# Supplementary material for: Incidence Trends of Inherited Anemias at the Global, Regional, and National Levels Over Three Decades
Source: Springer Nature journal article supplement (doi:10.1007/s44197-023-00170-9), 2023-12-11
Supplement: MOESM1 [file 44197_2023_170_MOESM1_ESM.pdf]

# Supplementary material

## Incidence trends of inherited anemias at the global, regional, and national levels over three decades

|                                                                                                                                                                                             |   |
|---------------------------------------------------------------------------------------------------------------------------------------------------------------------------------------------|---|
| <b>Supplementary Figure S1.</b> The hierarchical cluster analysis of the temporal trends in incidence rate of inherited anemias at national level. ....                                     | 1 |
| <b>Supplementary Figure S2.</b> The incidence rate of thalassemias in 2019. ....                                                                                                            | 2 |
| <b>Supplementary Figure S3.</b> The percentage change in incident cases of thalassemias between 1990 and 2019. ....                                                                         | 2 |
| <b>Supplementary Figure S4.</b> The EAPCs in incidence rate of thalassemias from 1990 to 2019. EAPCs, estimated annual percentage change. ....                                              | 3 |
| <b>Supplementary Figure S5.</b> The incidence rate of thalassemias trait in 2019. ....                                                                                                      | 3 |
| <b>Supplementary Figure S6.</b> The percentage change in incident cases of thalassemias trait between 1990 and 2019. ....                                                                   | 4 |
| <b>Supplementary Figure S7.</b> The EAPCs in incidence rate of thalassemias trait from 1990 to 2019. EAPCs, estimated annual percentage change. ....                                        | 4 |
| <b>Supplementary Figure S8.</b> The incidence rate of sickle cell disorders in 2019. ....                                                                                                   | 5 |
| <b>Supplementary Figure S9.</b> The percentage change in incident cases of sickle cell disorders between 1990 and 2019. ....                                                                | 5 |
| <b>Supplementary Figure S10.</b> The EAPCs in incidence rate of sickle cell disorders from 1990 to 2019. EAPCs, estimated annual percentage change. ....                                    | 6 |
| <b>Supplementary Figure S11.</b> The incidence rate of sickle cell trait in 2019. ....                                                                                                      | 6 |
| <b>Supplementary Figure S12.</b> The percentage change in incident cases of sickle cell trait between 1990 and 2019. ....                                                                   | 7 |
| <b>Supplementary Figure S13.</b> The EAPCs in incidence rate of sickle cell trait from 1990 to 2019. EAPCs, estimated annual percentage change. ....                                        | 7 |
| <b>Supplementary Figure S14.</b> The incidence rate of G6PD deficiency in 2019. G6PD, glucose-6-phosphate dehydrogenase. ....                                                               | 8 |
| <b>Supplementary Figure S15.</b> The percentage change in incident cases of G6PD deficiency between 1990 and 2019. G6PD, glucose-6-phosphate dehydrogenase. ....                            | 8 |
| <b>Supplementary Figure S16.</b> The EAPCs in incidence rate of G6PD deficiency from 1990 to 2019. EAPCs, estimated annual percentage change. G6PD, glucose-6-phosphate dehydrogenase. .... | 9 |

|                                                                                                                                                                                        |    |
|----------------------------------------------------------------------------------------------------------------------------------------------------------------------------------------|----|
| <b>Supplementary Figure S17.</b> The incidence rate of G6PD trait in 2019. G6PD, glucose-6-phosphate dehydrogenase. ....                                                               | 9  |
| <b>Supplementary Figure S18.</b> The percentage change in incident cases of G6PD trait between 1990 and 2019. G6PD, glucose-6-phosphate dehydrogenase. ....                            | 10 |
| <b>Supplementary Figure S19.</b> The EAPCs in incidence rate of G6PD trait from 1990 to 2019. EAPCs, estimated annual percentage change. G6PD, glucose-6-phosphate dehydrogenase. .... | 10 |
| <b>Supplementary Figure S20.</b> The EAPCs in incidence rate of thalassemias from 1990 to 2019, at global, regional and national level for both sexes combined. ....                   | 11 |
| <b>Supplementary Figure S21.</b> The EAPCs in incidence rate of thalassemias trait from 1990 to 2019, at global, regional and national level for both sexes combined. ....             | 12 |
| <b>Supplementary Figure S22.</b> The EAPCs in incidence rate of sickle cell disorders from 1990 to 2019, at global, regional and national level for both sexes combined. ....          | 13 |
| <b>Supplementary Figure S23.</b> The EAPCs in incidence rate of sickle cell trait from 1990 to 2019, at global, regional and national level for both sexes combined. ....              | 14 |
| <b>Supplementary Figure S24.</b> The EAPCs in incidence rate of G6PD deficiency from 1990 to 2019, at global, regional and national level for both sexes combined. ....                | 15 |
| <b>Supplementary Figure S25.</b> The EAPCs in incidence rate of G6PD trait from 1990 to 2019, at global, regional and national level for both sexes combined. ....                     | 16 |
| <b>Supplementary Table S1.</b> The incident cases and incidence rates of thalassemias in 1990 and 2019, along with their temporal trend. ....                                          | 17 |
| <b>Supplementary Table S2.</b> The incident cases and incidence rates of thalassemias trait in 1990 and 2019, along with their temporal trend. ....                                    | 19 |
| <b>Supplementary Table S3.</b> The incident cases and incidence rates of sickle cell disorders in 1990 and 2019, along with their temporal trend. ....                                 | 21 |
| <b>Supplementary Table S4.</b> The incident cases and incidence rates of sickle cell trait in 1990 and 2019, along with their temporal trend. ....                                     | 23 |
| <b>Supplementary Table S5.</b> The incident cases and incidence rates of G6PD deficiency in 1990 and 2019, along with their temporal trend. ....                                       | 25 |
| <b>Supplementary Table S6.</b> The incident cases and incidence rates of G6PD trait in 1990 and 2019, along with their temporal trend. ....                                            | 27 |
| <b>Supplementary Table S7.</b> The change of inherited anemias cases and incidence rates between 1990 and 2019 at national level, both sexes. ....                                     | 29 |

**Supplementary Figure S1.** The hierarchical cluster analysis of the temporal trends in incidence rate of inherited anemias at national level.

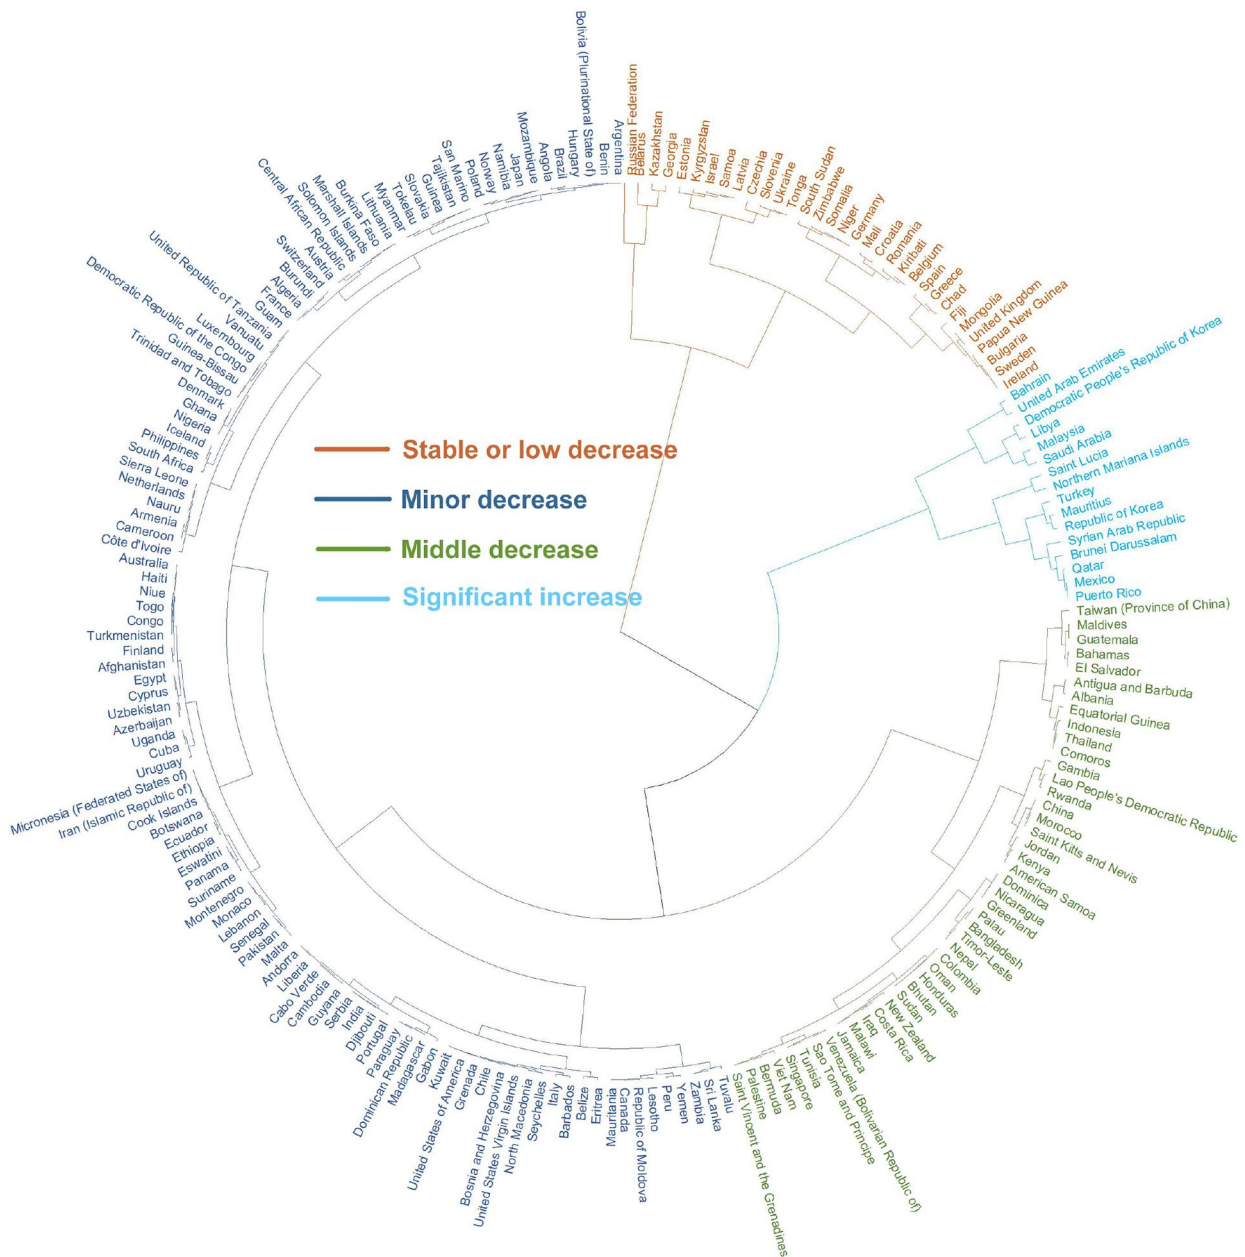

**Supplementary Figure S2.** The incidence rate of thalassemias in 2019.

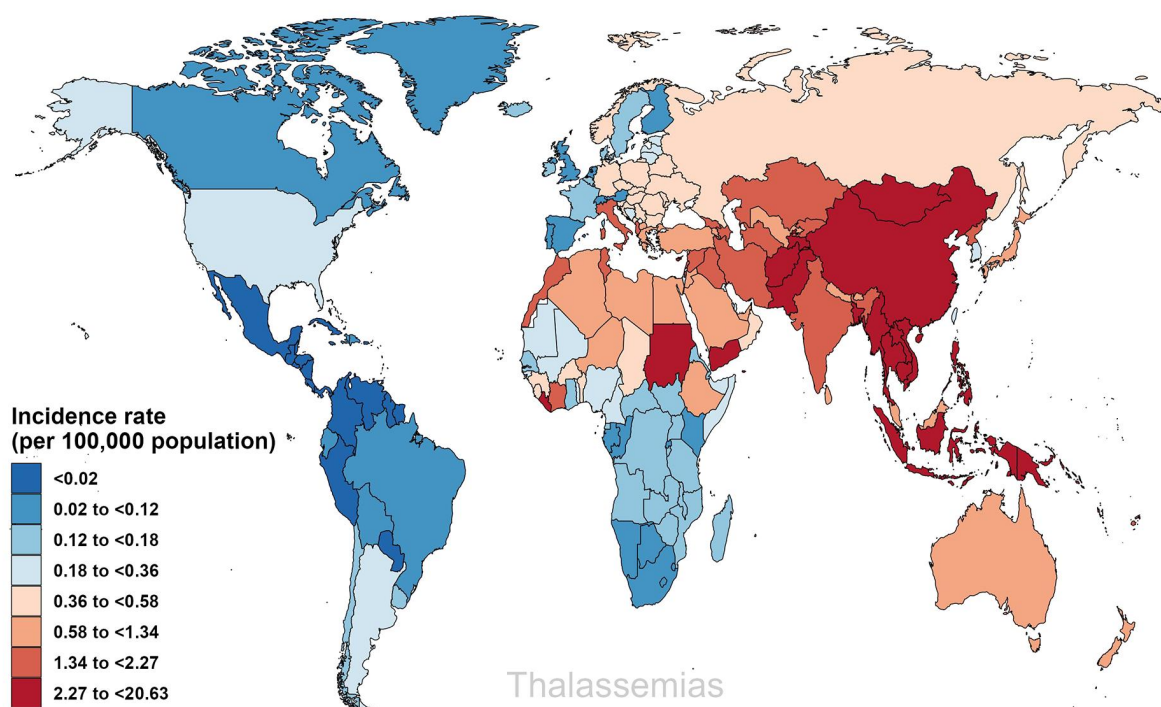

**Supplementary Figure S3.** The percentage change in incident cases of thalassemias between 1990 and 2019.

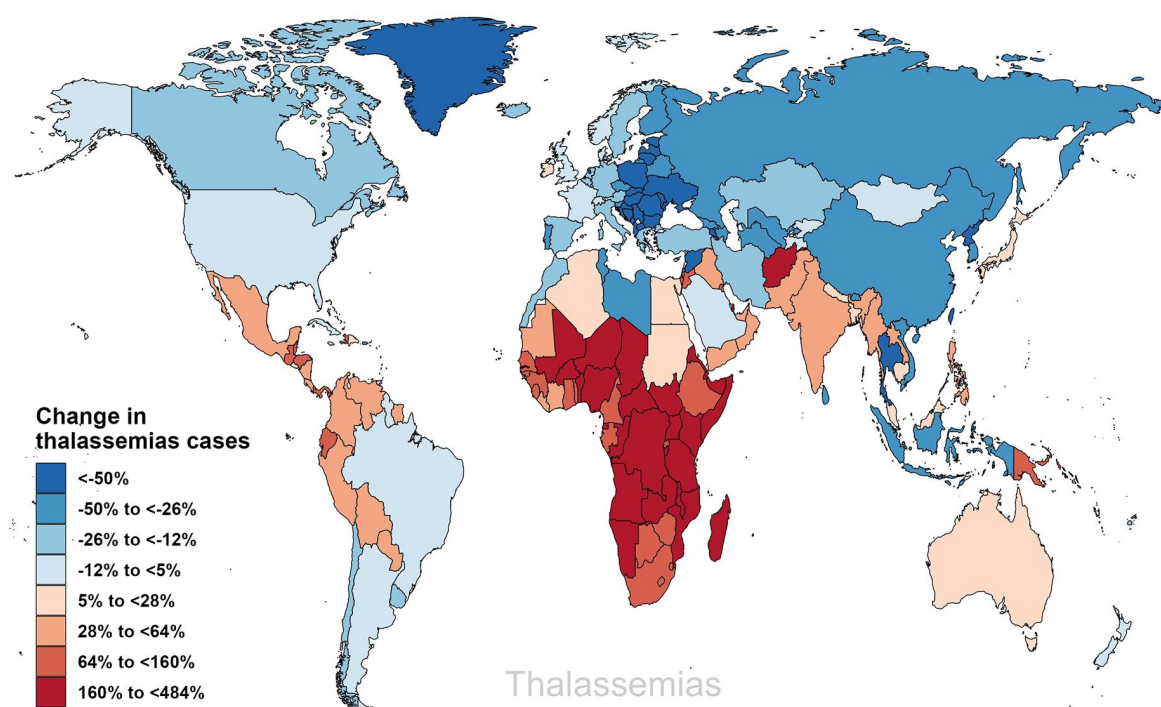

**Supplementary Figure S4.** The EAPCs in incidence rate of thalassemias from 1990 to 2019.

EAPCs, estimated annual percentage change.

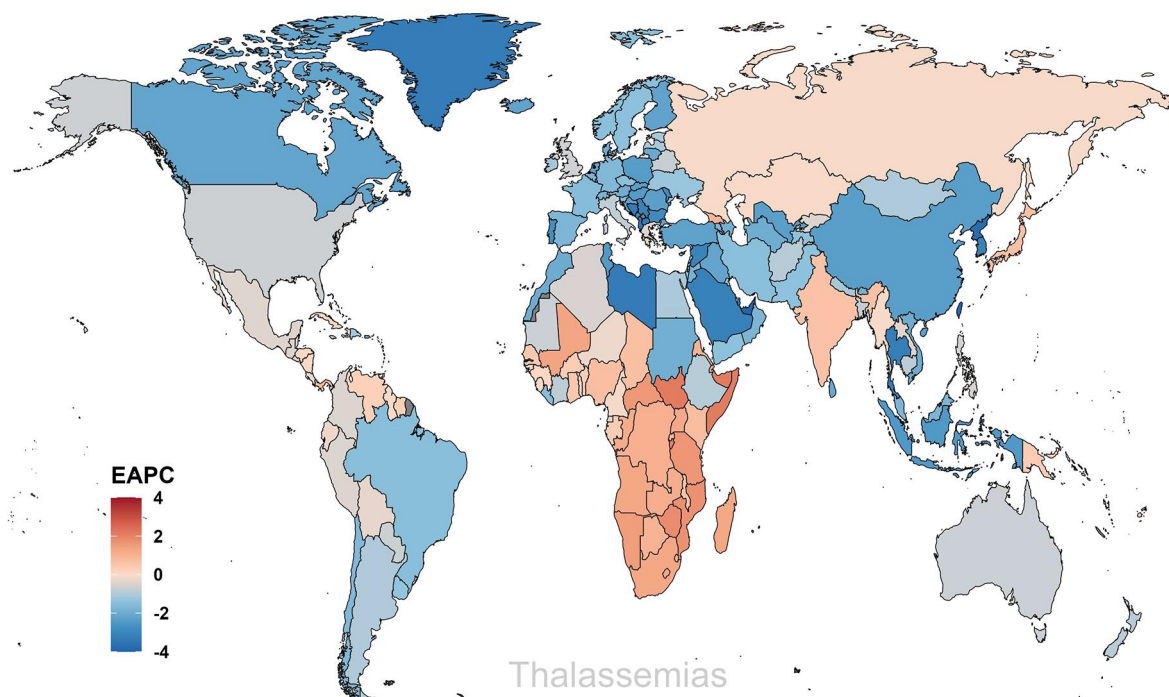

**Supplementary Figure S5.** The incidence rate of thalassemias trait in 2019.

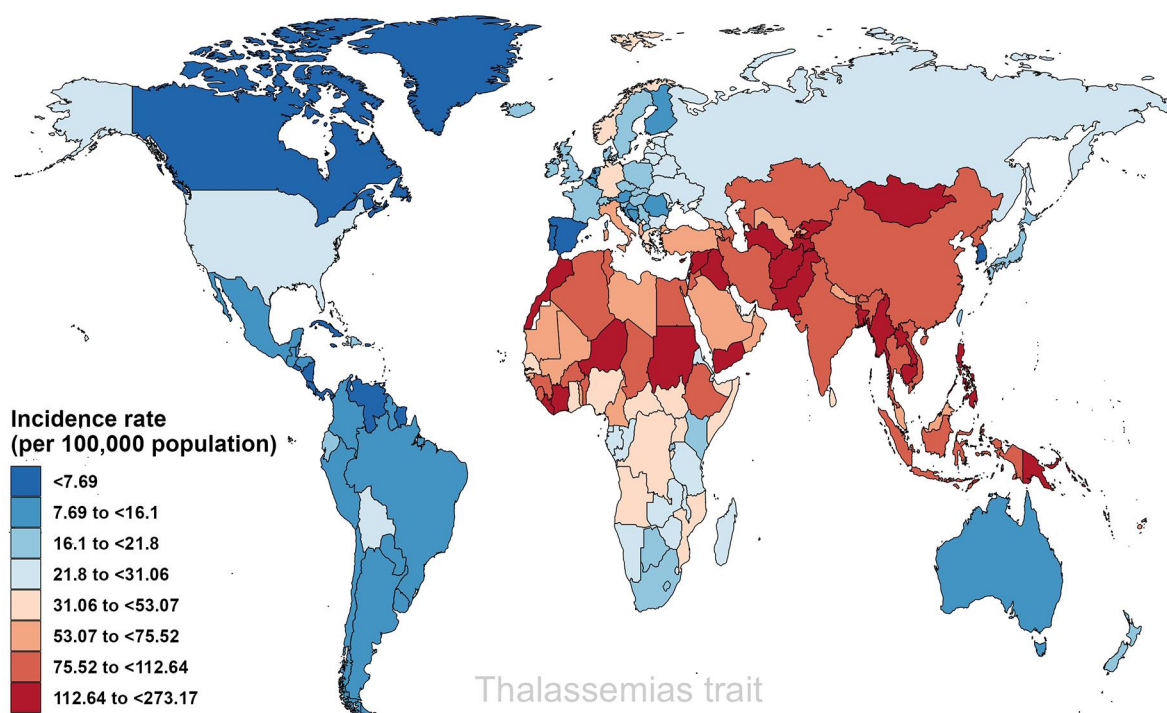



**Supplementary Figure S6.** The percentage change in incident cases of thalassemias trait between 1990 and 2019.

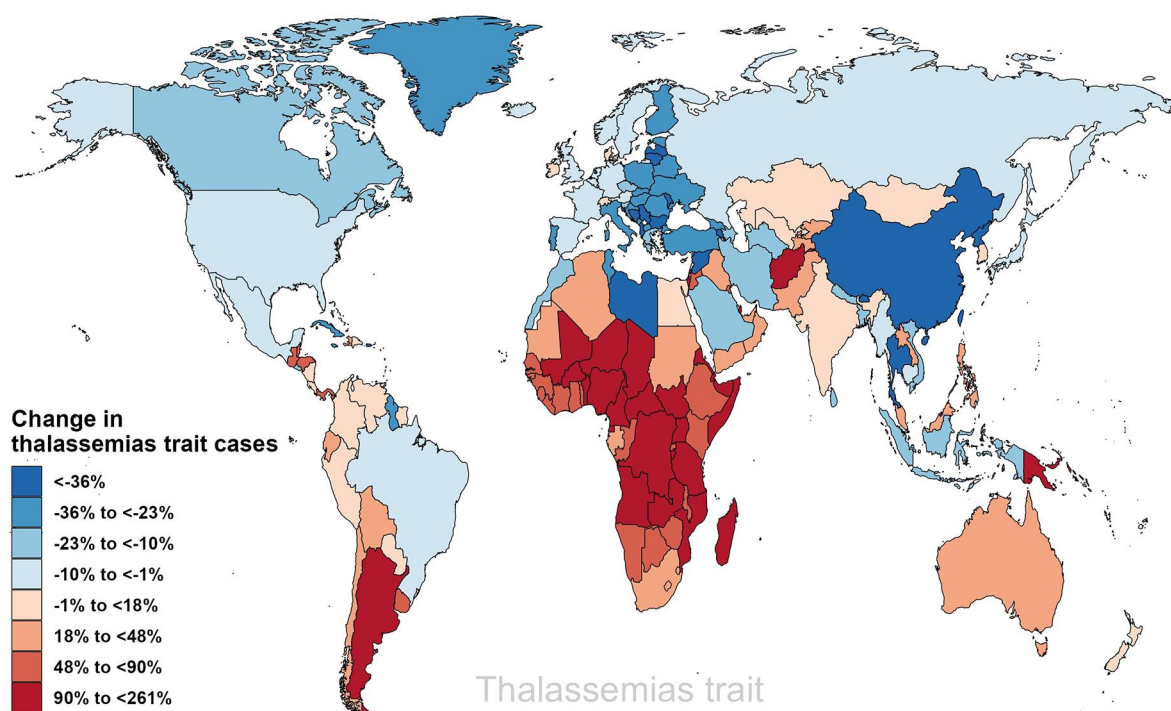

**Supplementary Figure S7.** The EAPCs in incidence rate of thalassemias trait from 1990 to 2019. EAPCs, estimated annual percentage change.

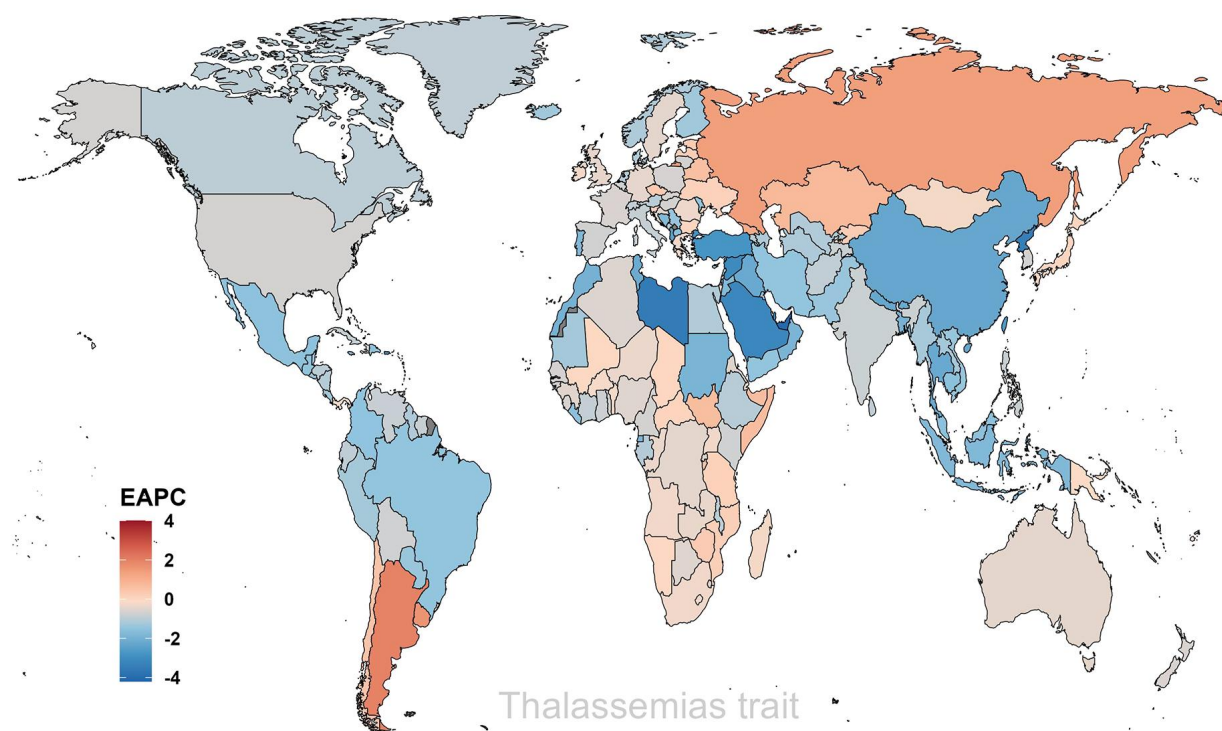

**Supplementary Figure S8.** The incidence rate of sickle cell disorders in 2019.

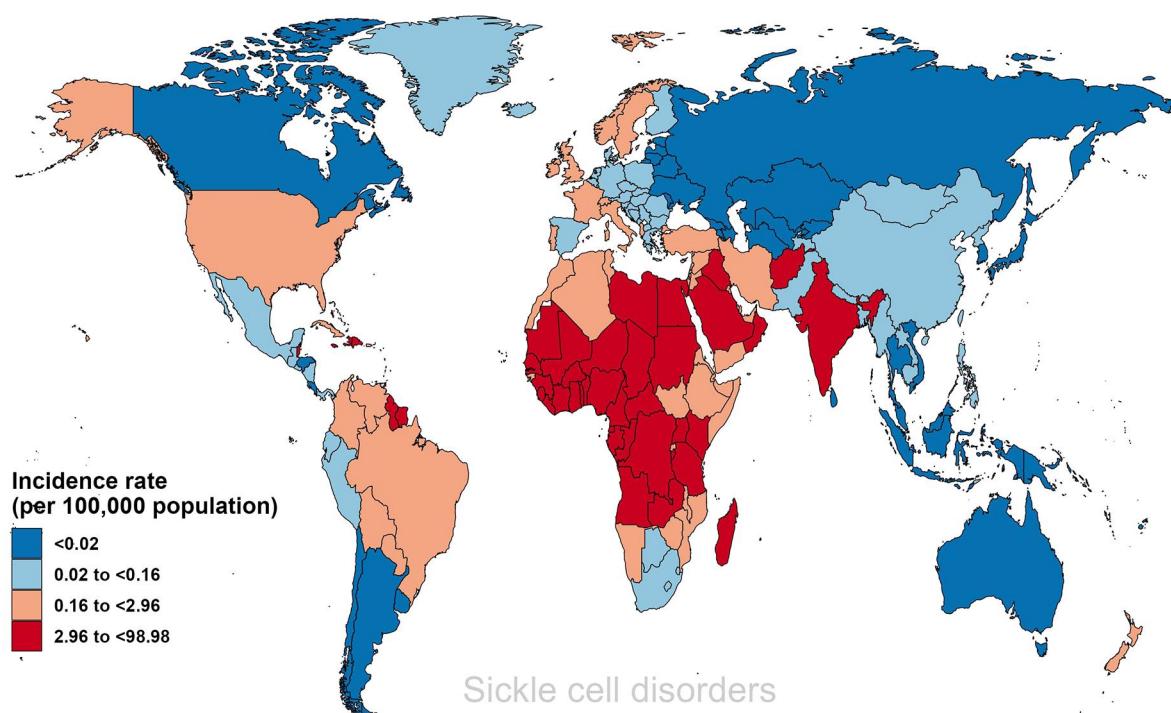

**Supplementary Figure S9.** The percentage change in incident cases of sickle cell disorders between 1990 and 2019.

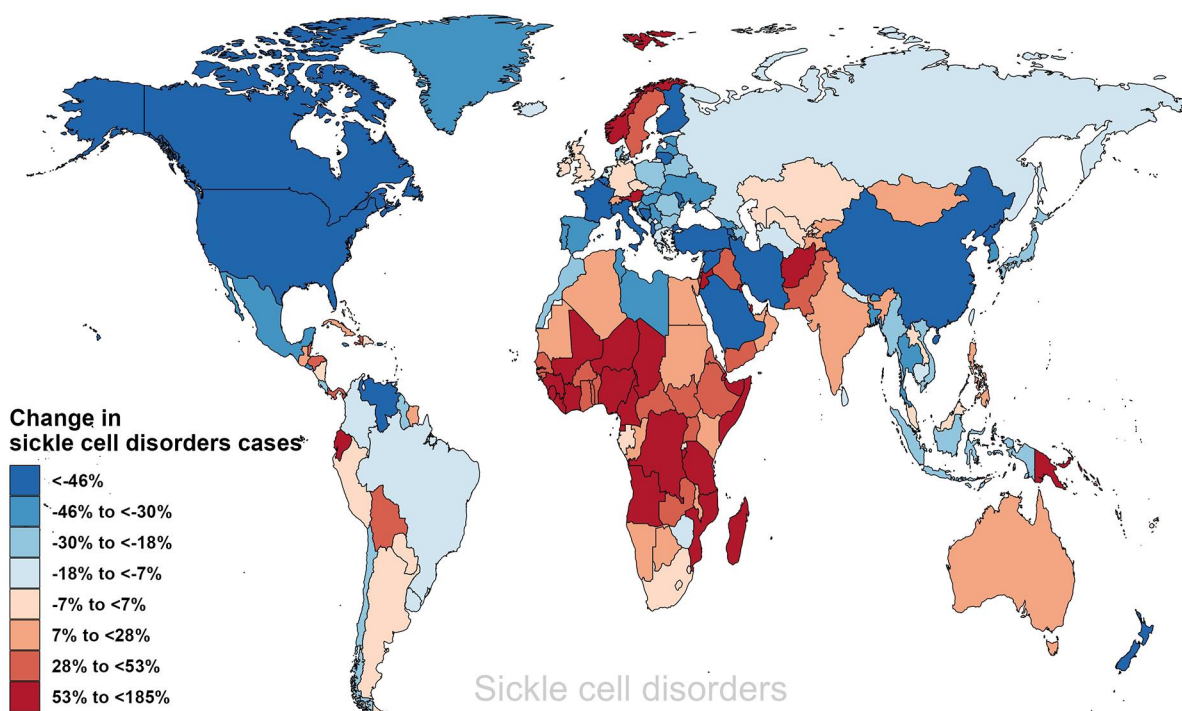

**Supplementary Figure S10.** The EAPCs in incidence rate of sickle cell disorders from 1990 to 2019. EAPCs, estimated annual percentage change.

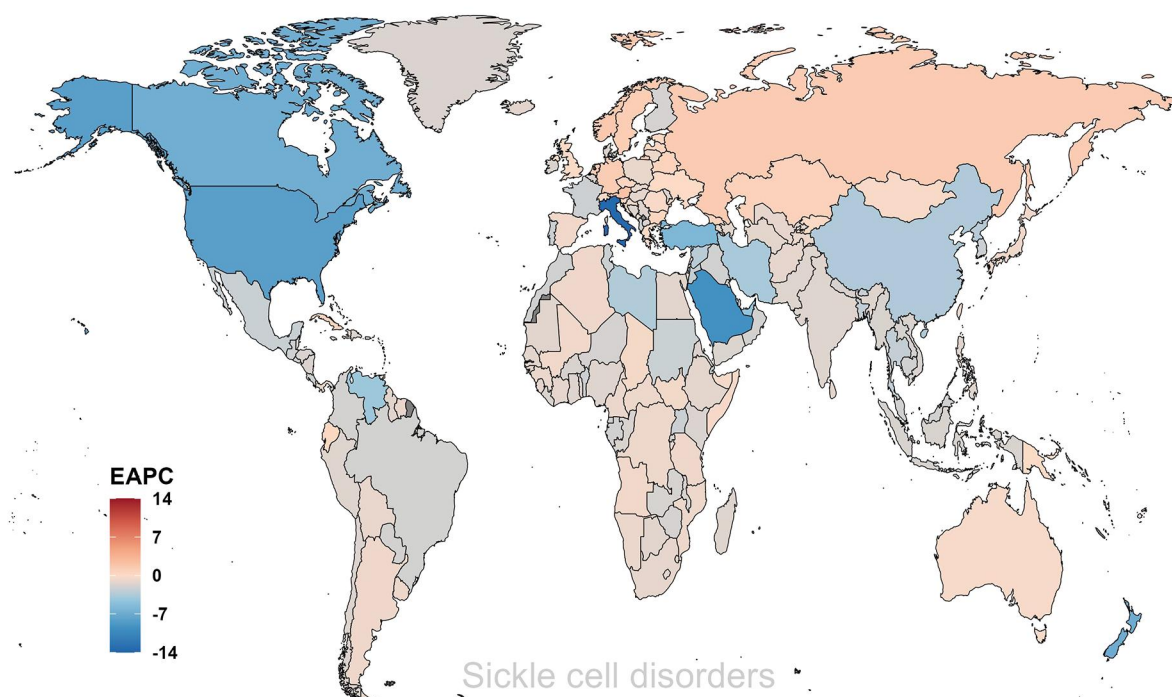

**Supplementary Figure S11.** The incidence rate of sickle cell trait in 2019.

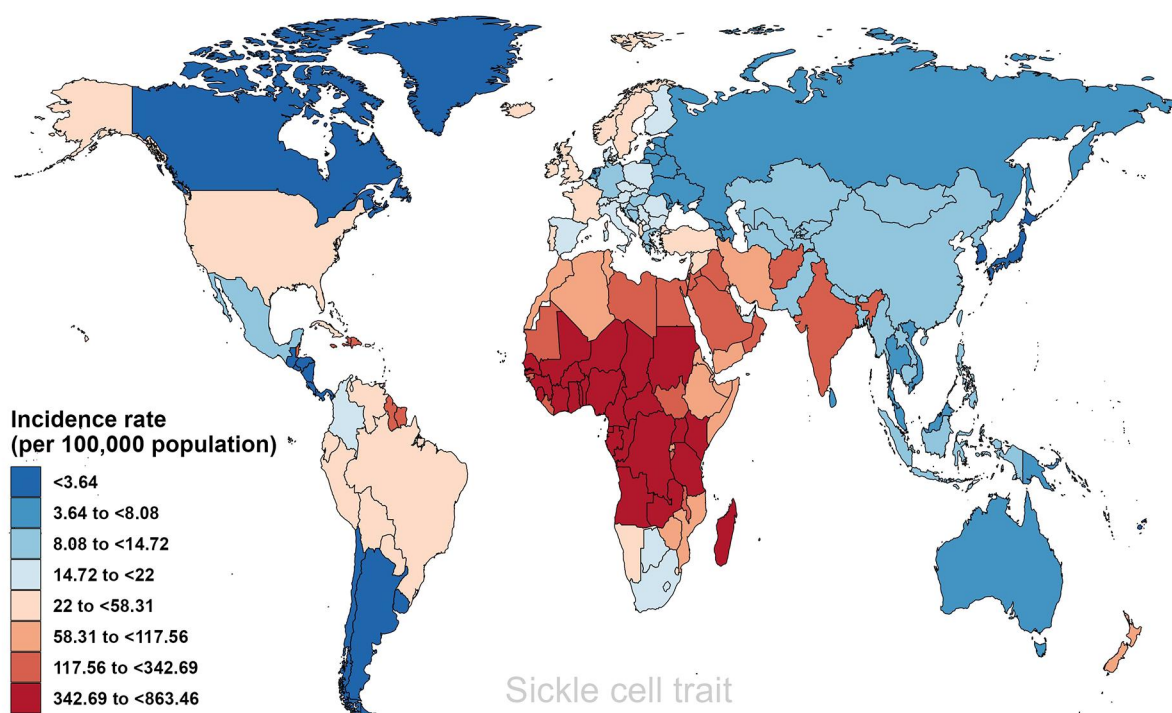



**Supplementary Figure S12.** The percentage change in incident cases of sickle cell trait between 1990 and 2019.

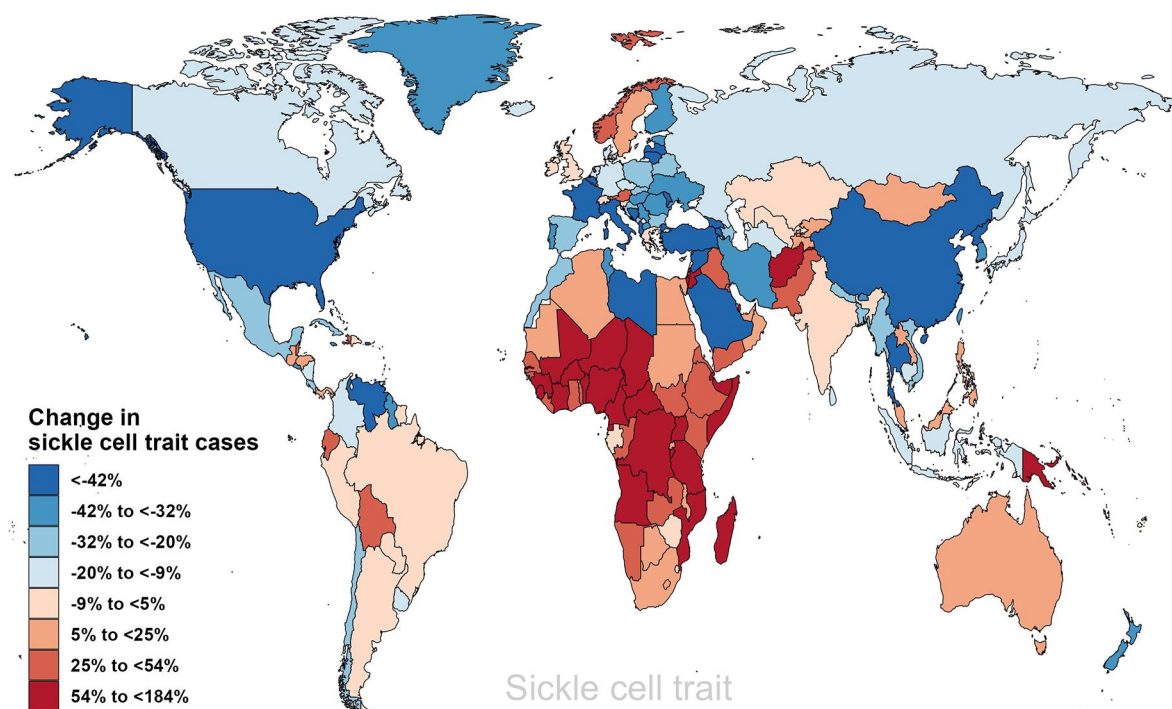

**Supplementary Figure S13.** The EAPCs in incidence rate of sickle cell trait from 1990 to 2019. EAPCs, estimated annual percentage change.

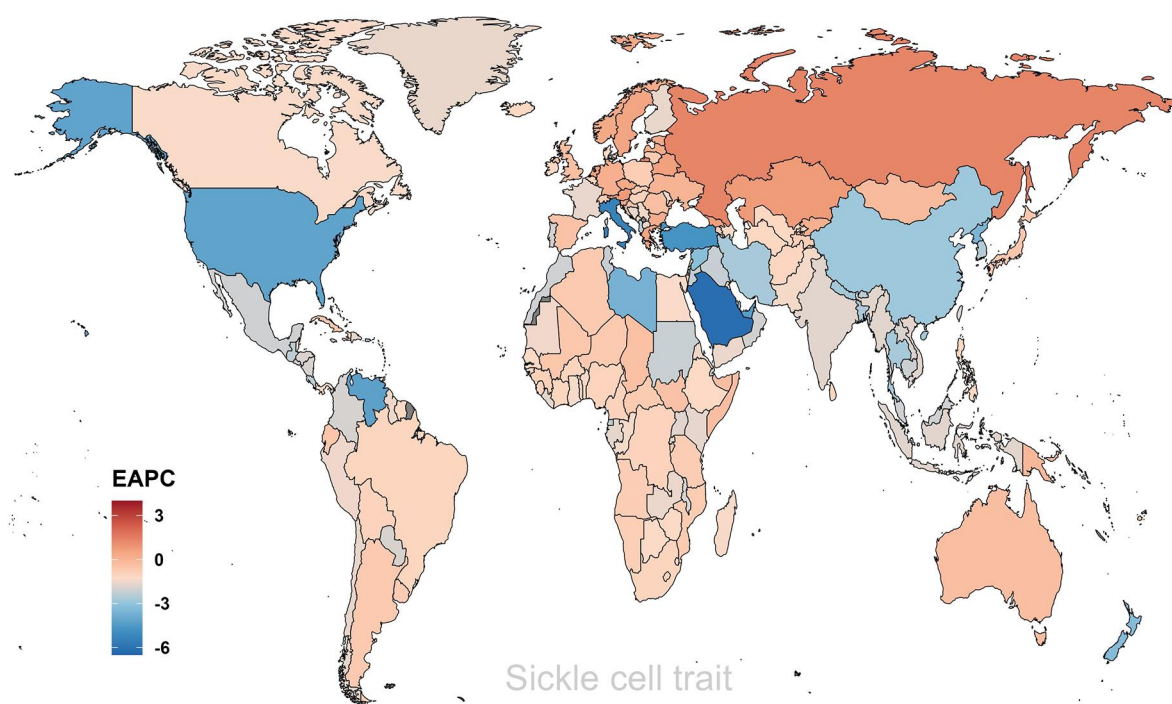

**Supplementary Figure S14.** The incidence rate of G6PD deficiency in 2019. G6PD, glucose-6-phosphate dehydrogenase.

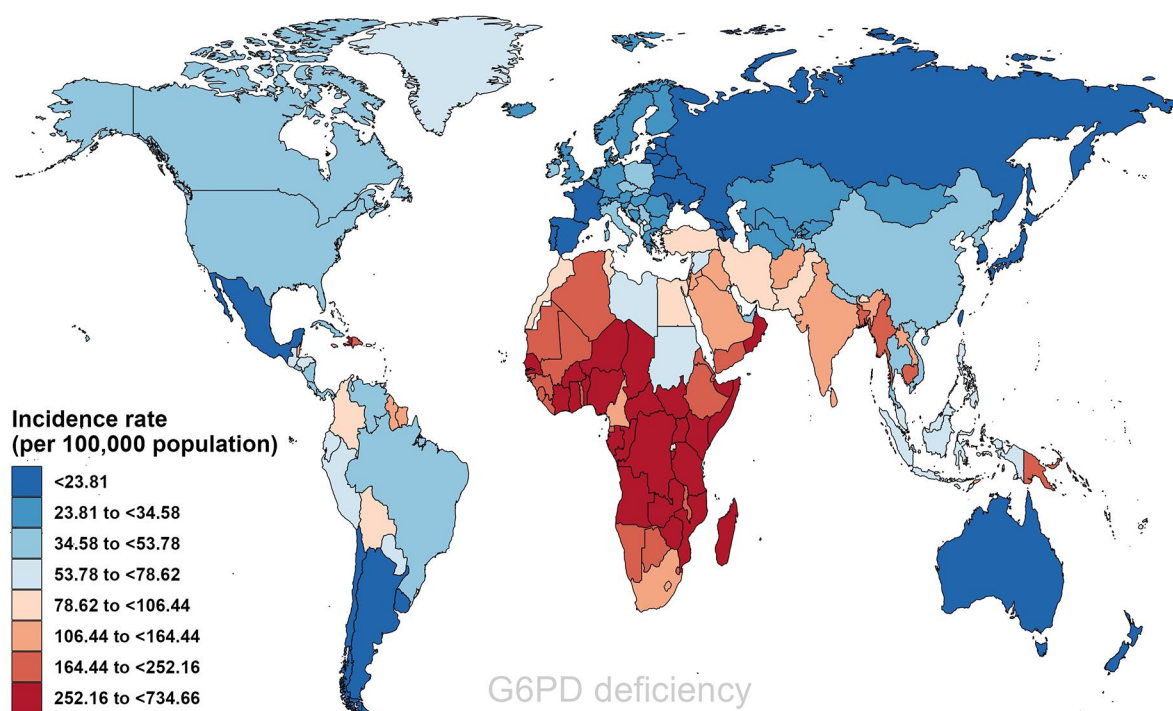

**Supplementary Figure S15.** The percentage change in incident cases of G6PD deficiency between 1990 and 2019. G6PD, glucose-6-phosphate dehydrogenase.

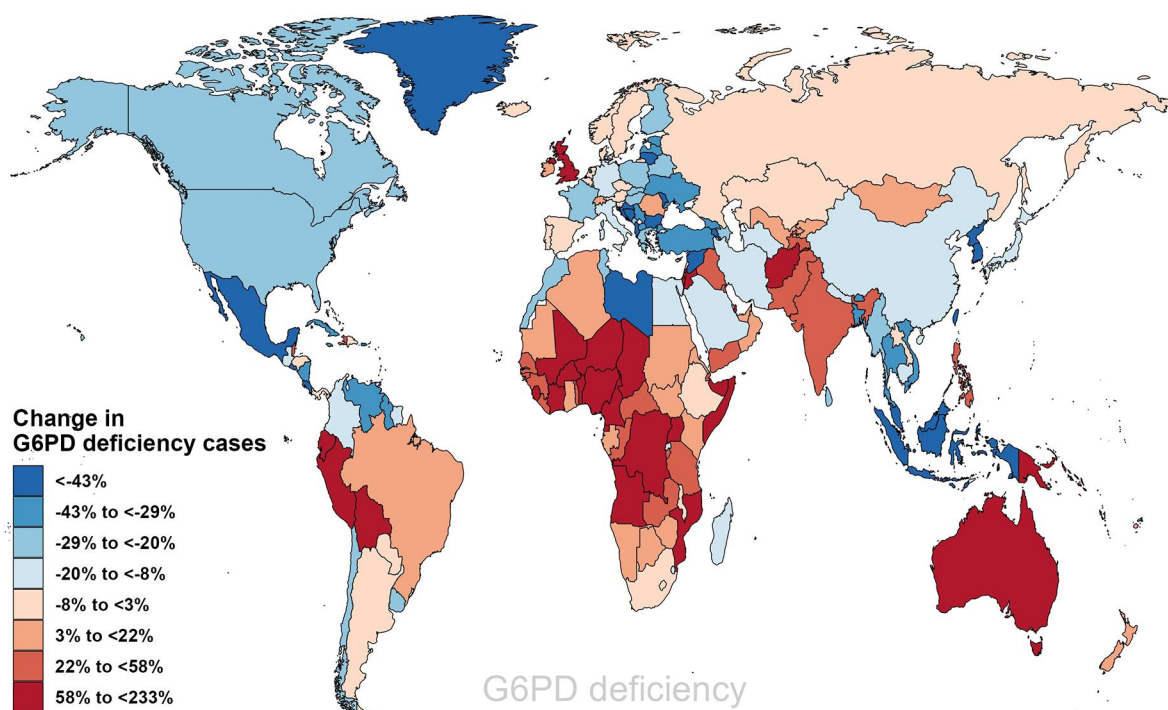

**Supplementary Figure S16.** The EAPCs in incidence rate of G6PD deficiency from 1990 to 2019. EAPCs, estimated annual percentage change. G6PD, glucose-6-phosphate dehydrogenase.

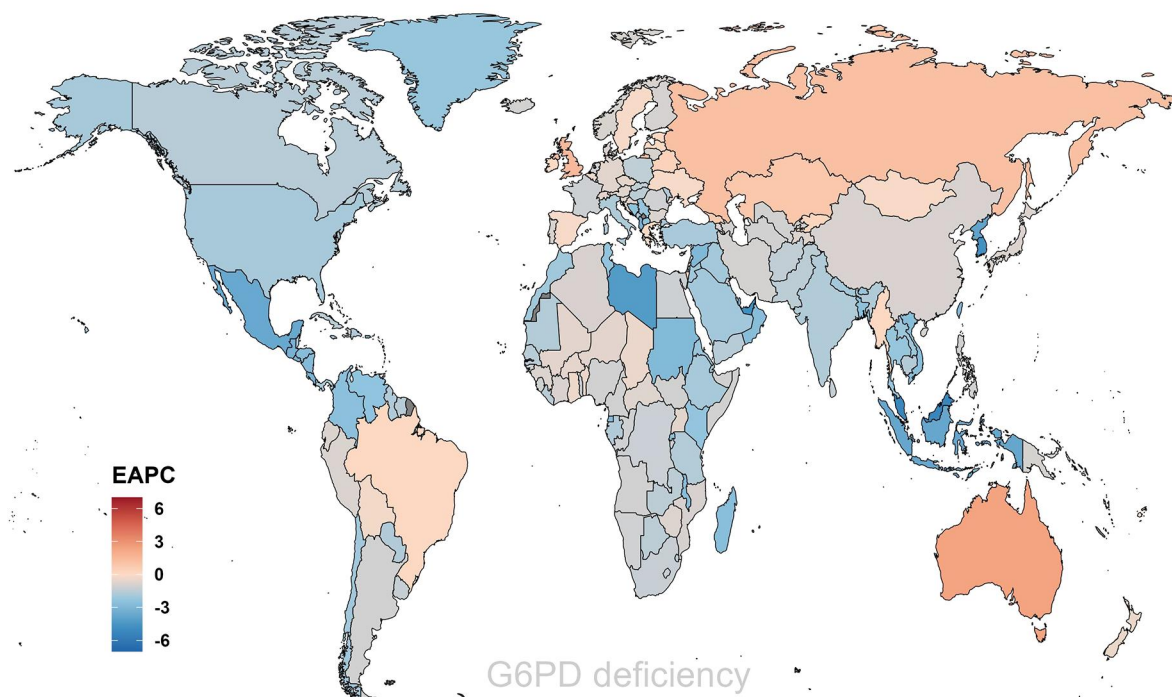

**Supplementary Figure S17.** The incidence rate of G6PD trait in 2019. G6PD, glucose-6-phosphate dehydrogenase.

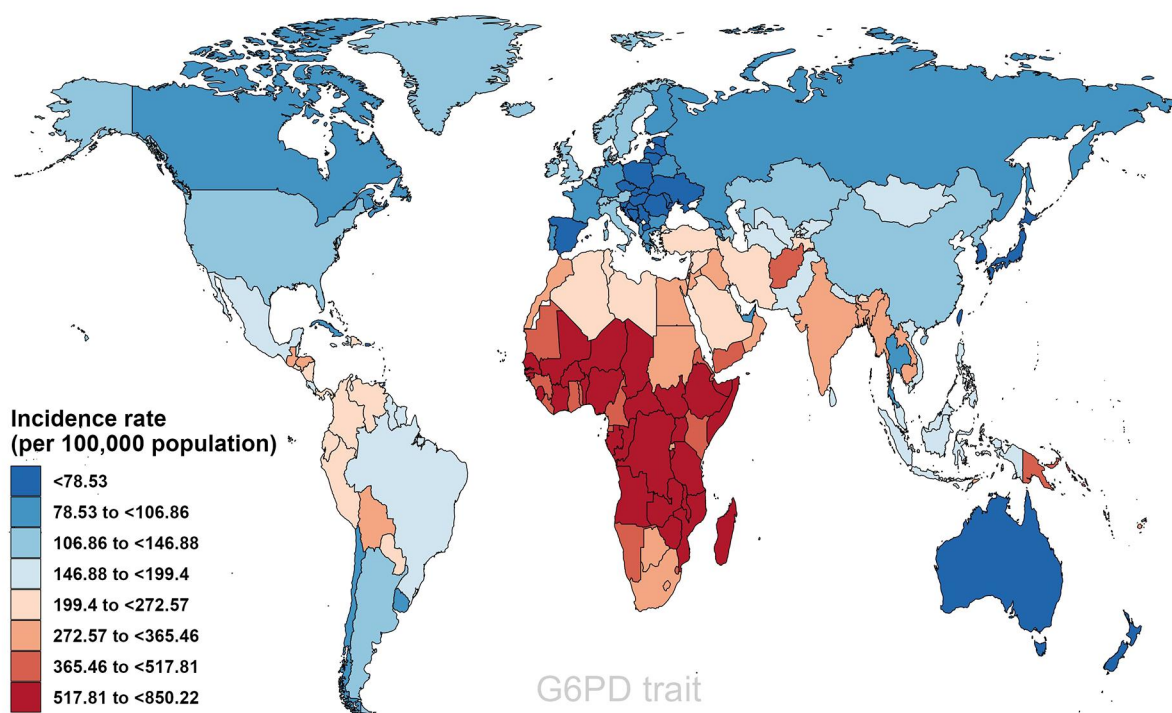



**Supplementary Figure S18.** The percentage change in incident cases of G6PD trait between 1990 and 2019. G6PD, glucose-6-phosphate dehydrogenase.

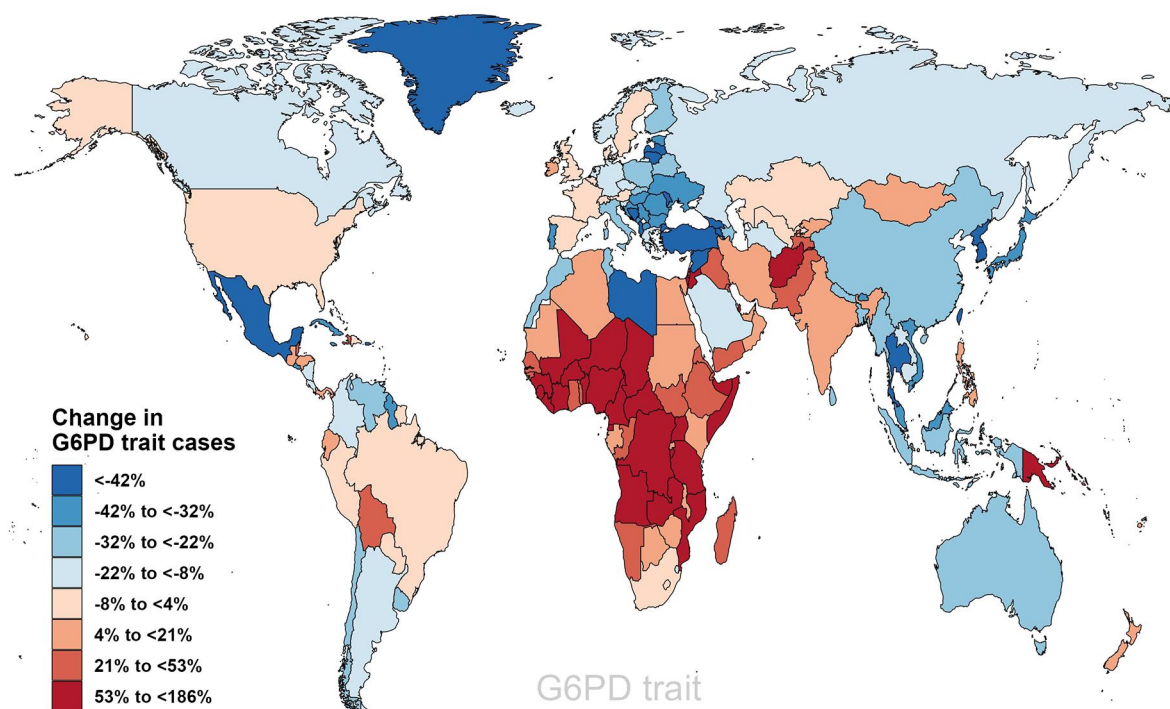

**Supplementary Figure S19.** The EAPCs in incidence rate of G6PD trait from 1990 to 2019.

EAPCs, estimated annual percentage change. G6PD, glucose-6-phosphate dehydrogenase.

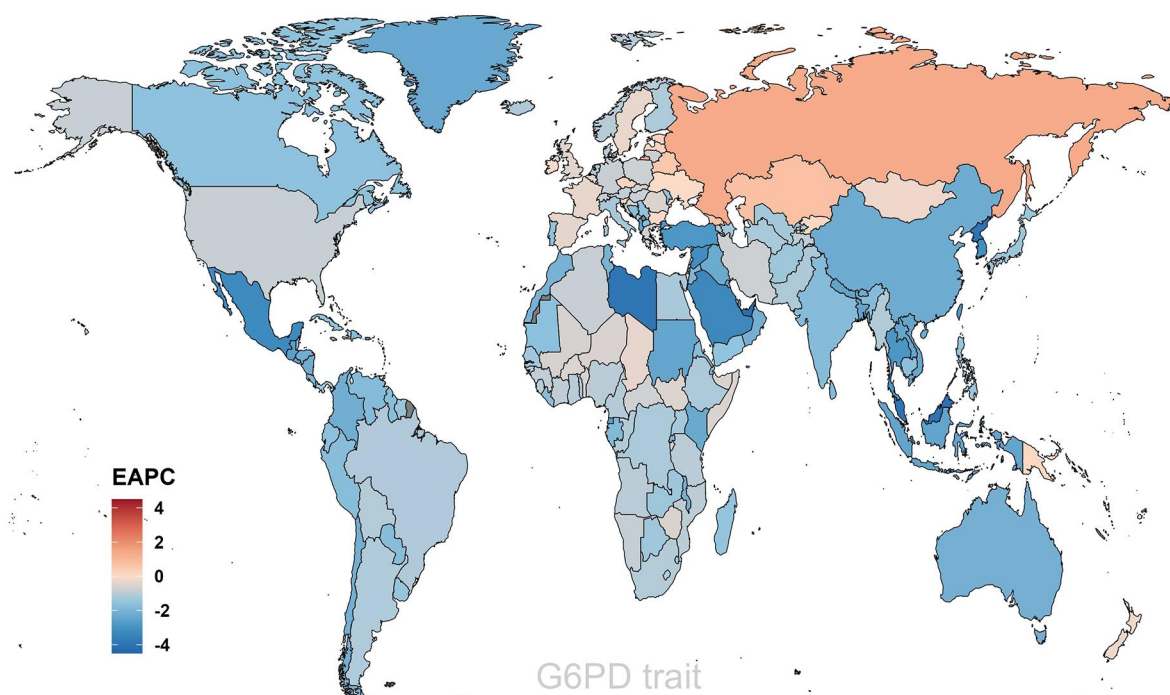



**Supplementary Figure S20.** The EAPCs in incidence rate of thalassemias from 1990 to 2019, at global, regional and national level for both sexes combined.

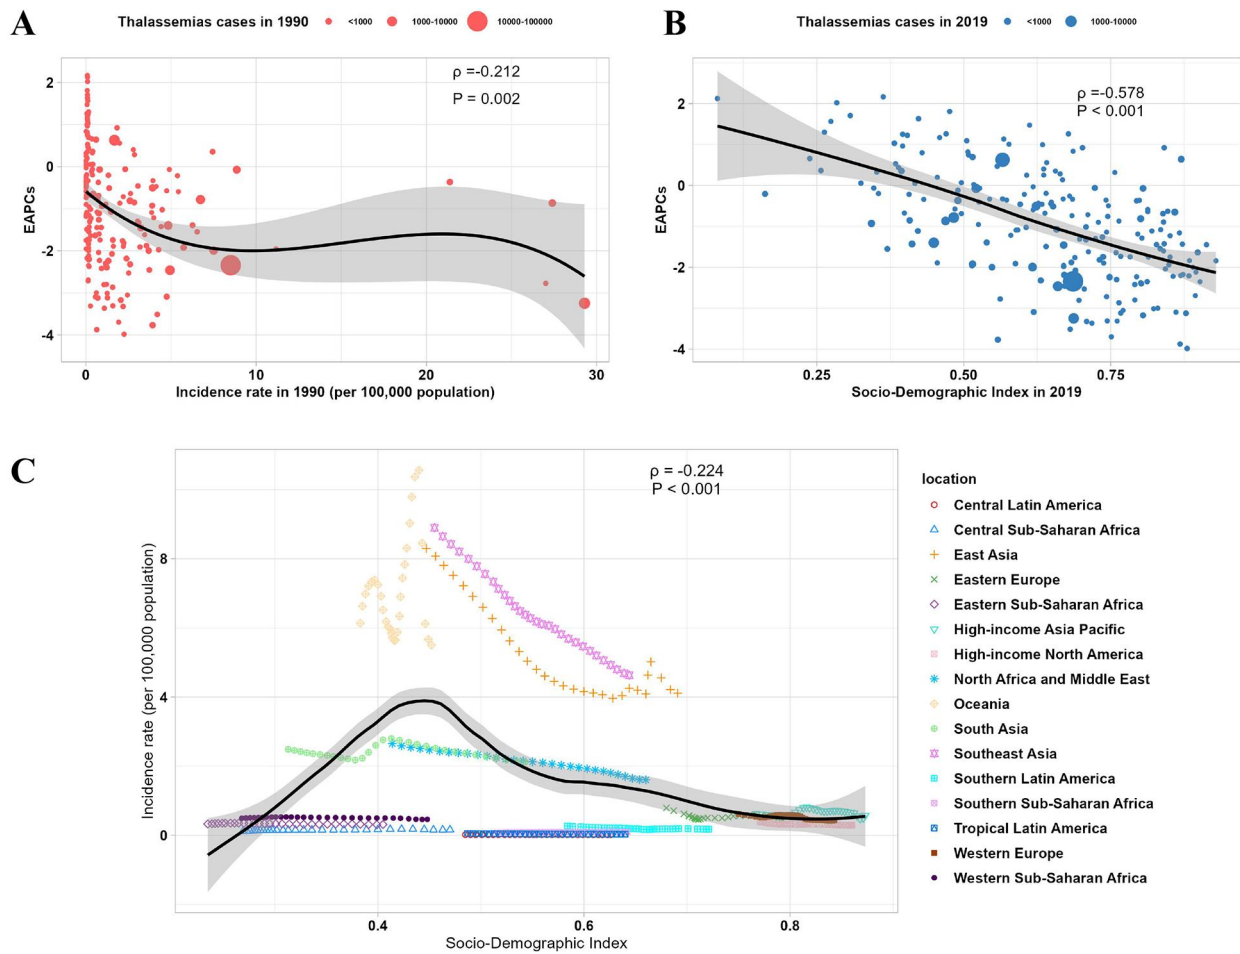

(A) The correlation between EAPCs and thalassemias incidence rate in 1990. (B) The correlation between EAPCs and SDI in 2019. (C) Incidence rate of thalassemias by region from 1990 to 2019 based on SDI levels. EAPCs, estimated annual percentage change. SDI, Socio-Demographic Index.

**Supplementary Figure S21.** The EAPCs in incidence rate of thalassemias trait from 1990 to 2019, at global, regional and national level for both sexes combined.

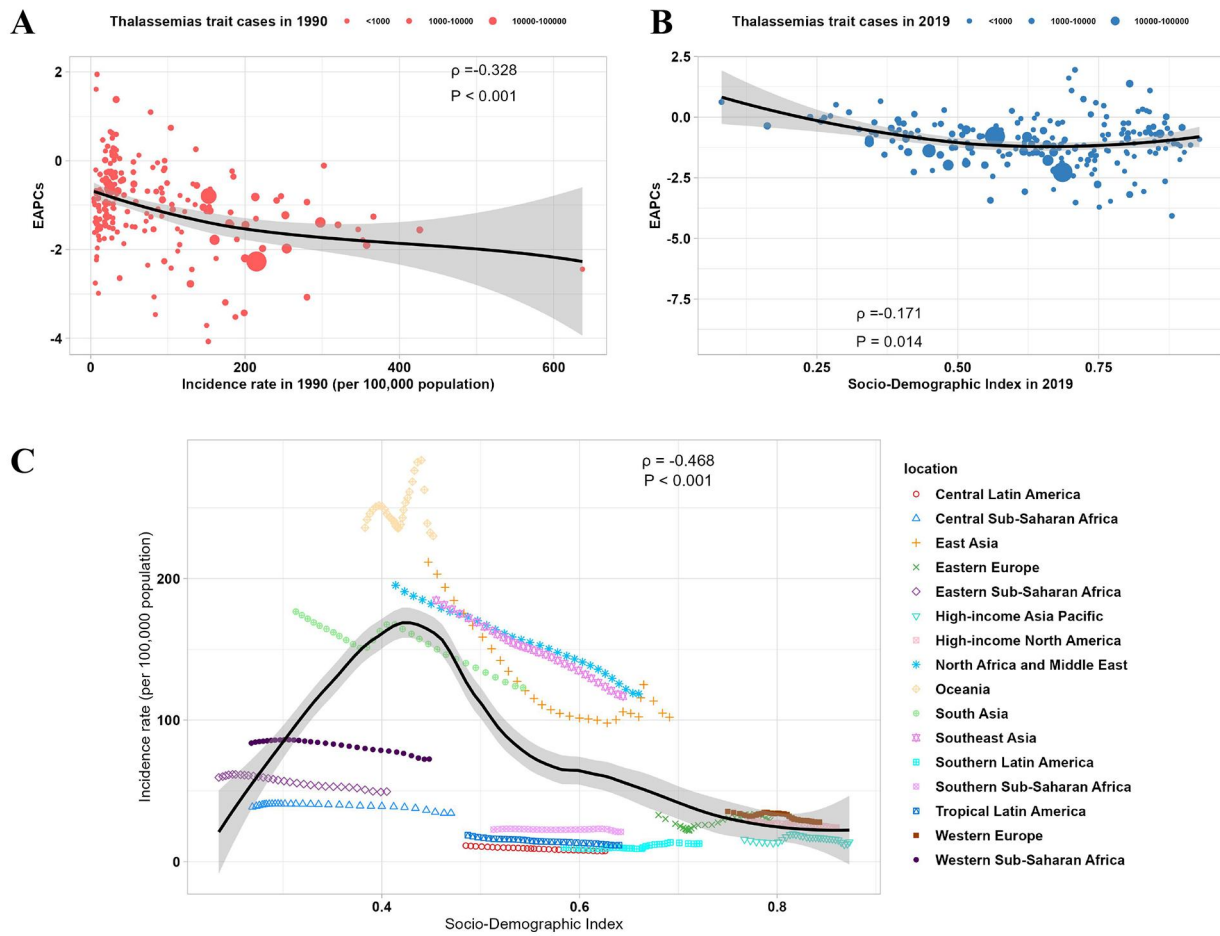

(A) The correlation between EAPCs and thalassemias trait incidence rate in 1990. (B) The correlation between EAPCs and SDI in 2019. (C) Incidence rate of thalassemias trait by region from 1990 to 2019 based on SDI levels. EAPCs, estimated annual percentage change. SDI, Socio-Demographic Index.

**Supplementary Figure S22.** The EAPCs in incidence rate of sickle cell disorders from 1990 to 2019, at global, regional and national level for both sexes combined.

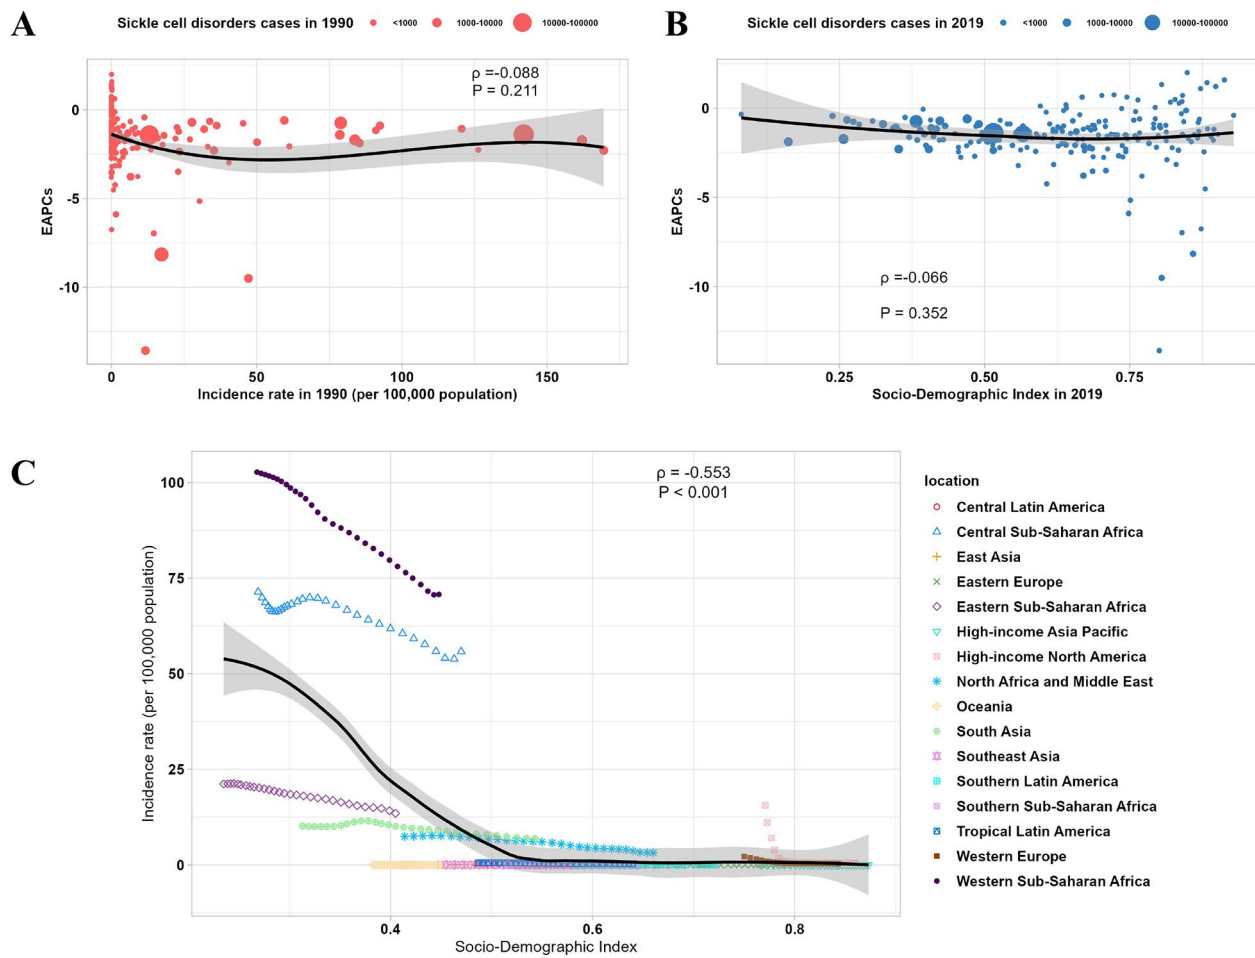

(A) The correlation between EAPCs and sickle cell disorders incidence rate in 1990. (B) The correlation between EAPCs and SDI in 2019. (C) Incidence rate of sickle cell disorders by region from 1990 to 2019 based on SDI levels. EAPCs, estimated annual percentage change. SDI, Socio-Demographic Index.

**Supplementary Figure S23.** The EAPCs in incidence rate of sickle cell trait from 1990 to 2019, at global, regional and national level for both sexes combined.

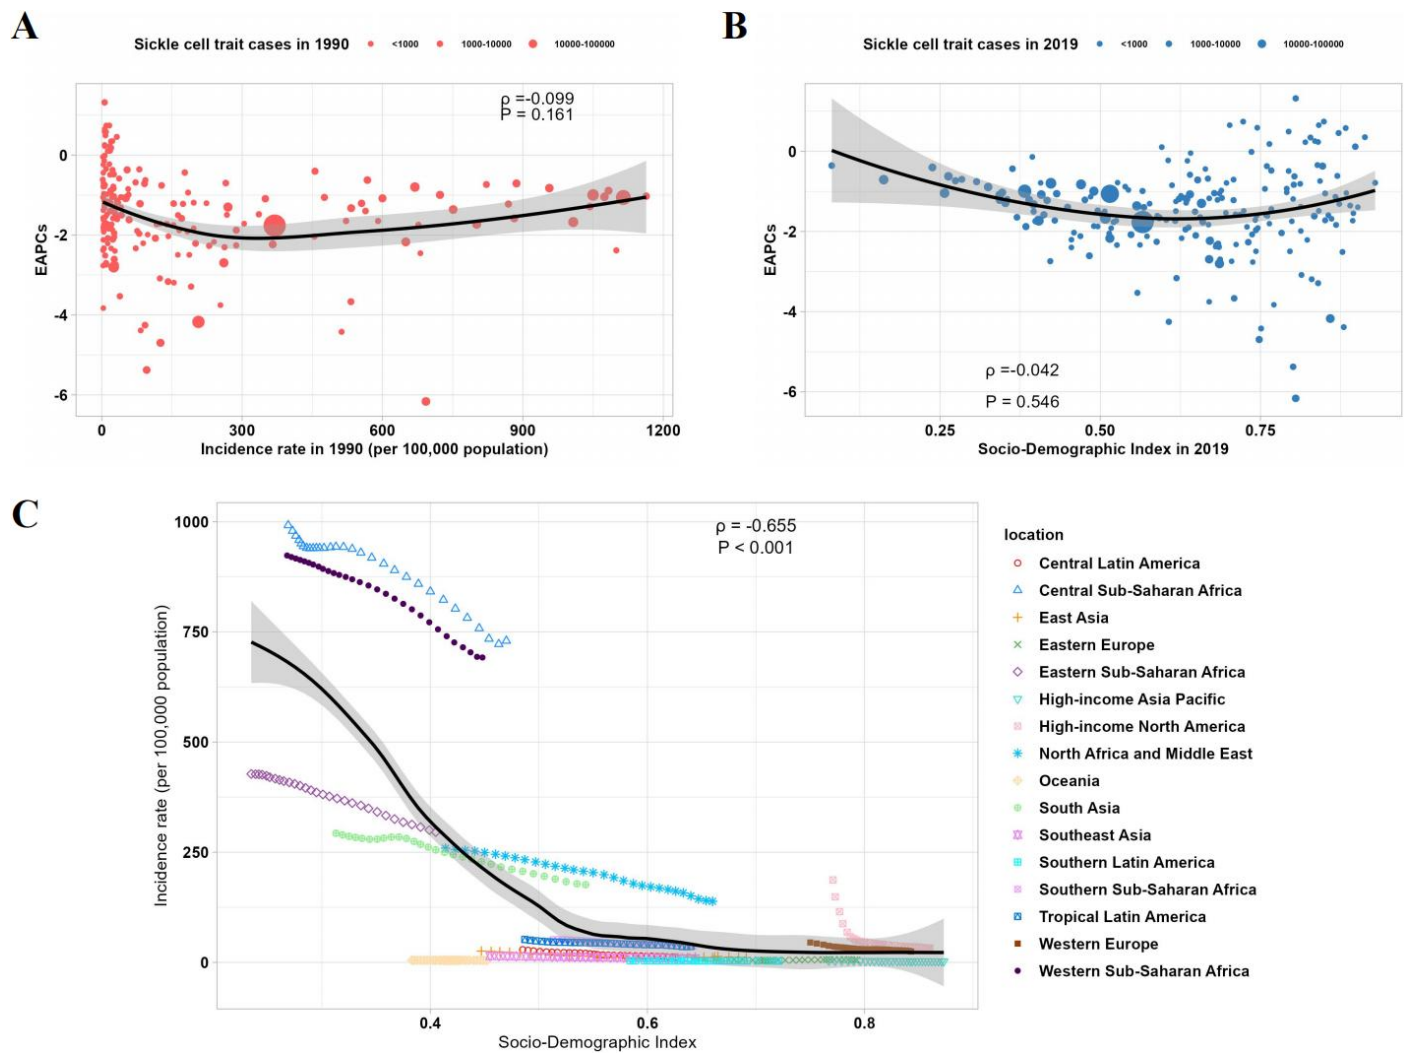

(A) The correlation between EAPCs and sickle cell trait incidence rate in 1990. (B) The correlation between EAPCs and SDI in 2019. (C) Incidence rate of sickle cell trait by region from 1990 to 2019 based on SDI levels. EAPCs, estimated annual percentage change. SDI, Socio-Demographic Index.



**Supplementary Figure S24.** The EAPCs in incidence rate of G6PD deficiency from 1990 to 2019, at global, regional and national level for both sexes combined.

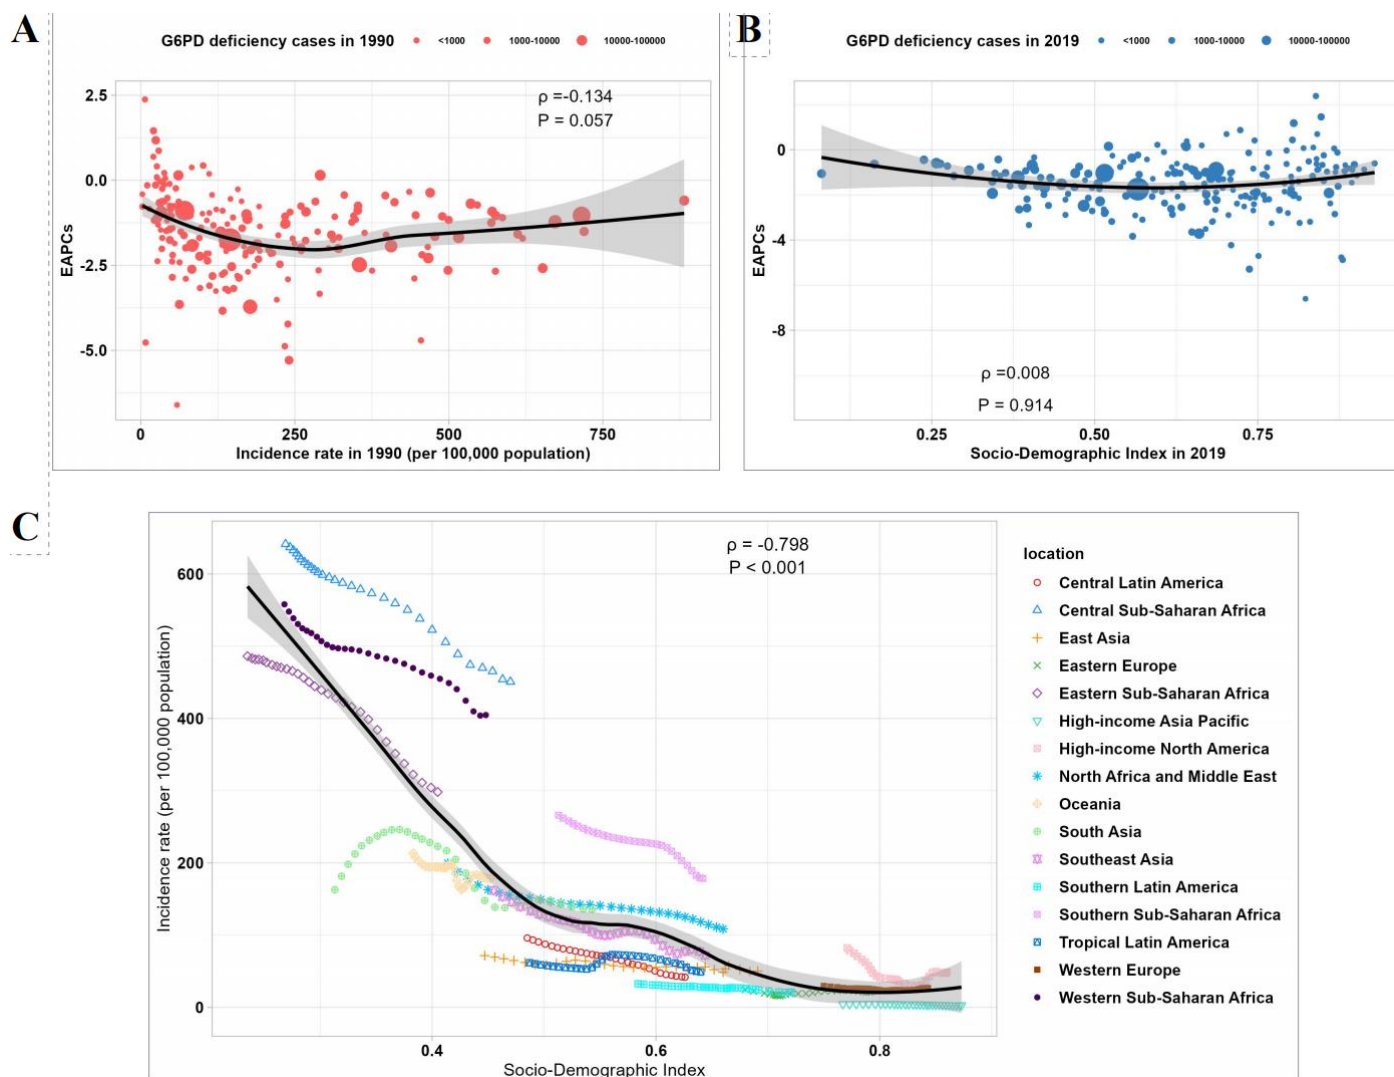

(A) The correlation between EAPCs and G6PD deficiency incidence rate in 1990. (B) The correlation between EAPCs and SDI in 2019. (C) Incidence rate of G6PD deficiency by region from 1990 to 2019 based on SDI levels. EAPCs, estimated annual percentage change. SDI, Socio-Demographic Index.

**Supplementary Figure S25.** The EAPCs in incidence rate of G6PD trait from 1990 to 2019, at global, regional and national level for both sexes combined.

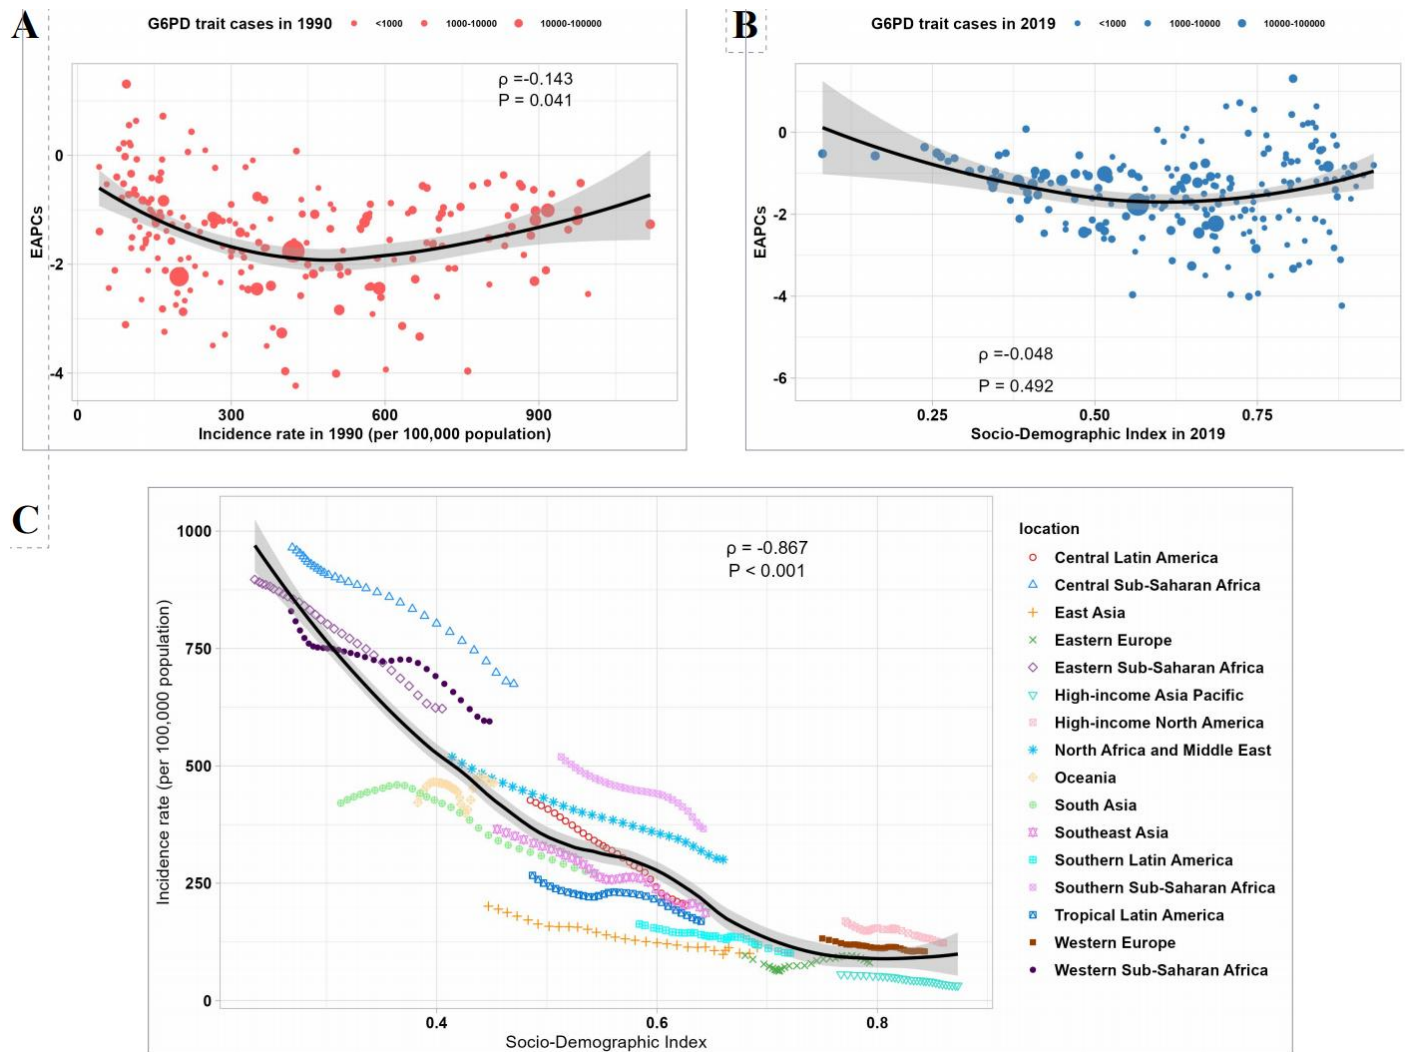

(A) The correlation between EAPCs and G6PD trait incidence rate in 1990. (B) The correlation between EAPCs and SDI in 2019. (C) Incidence rate of G6PD trait by region from 1990 to 2019 based on SDI levels. EAPCs, estimated annual percentage change. SDI, Socio-Demographic Index.

**Supplementary Table S1.** The incident cases and incidence rates of thalassemias in 1990 and 2019, along with their temporal trend.

| Characteristics            | 1990                                           |                                           | 2019                                           |                                           | 1990-2019                 |
|----------------------------|------------------------------------------------|-------------------------------------------|------------------------------------------------|-------------------------------------------|---------------------------|
|                            | Incident cases<br>No.×10 <sup>3</sup> (95% UI) | Incidence rates<br>per 100000<br>(95% UI) | Incident cases<br>No.×10 <sup>3</sup> (95% UI) | Incidence rates<br>per 100000<br>(95% UI) | EAPC<br>(95%CI)           |
| <b>Global</b>              | 192.08<br>(150.02 to 253.13)                   | 3.59<br>(2.8 to 4.73)                     | 151.9<br>(118.84 to 200.99)                    | 1.96<br>(1.54 to 2.6)                     | -1.9<br>(-2.08 to -1.71)  |
| <b>Sex</b>                 |                                                |                                           |                                                |                                           |                           |
| Male                       | 111.07<br>(85.67 to 146.49)                    | 4.12<br>(3.18 to 5.44)                    | 90.29<br>(70.08 to 120.52)                     | 2.33<br>(1.81 to 3.11)                    | -1.74<br>(-1.93 to -1.56) |
| Female                     | 81.01<br>(63.6 to 105.05)                      | 3.05<br>(2.39 to 3.96)                    | 61.6<br>(48.6 to 80.01)                        | 1.6<br>(1.26 to 2.07)                     | -2.11<br>(-2.31 to -1.91) |
| <b>Region</b>              |                                                |                                           |                                                |                                           |                           |
| Andean Latin America       | 0.01<br>(0.01 to 0.02)                         | 0.04<br>(0.03 to 0.05)                    | 0.02<br>(0.02 to 0.03)                         | 0.04<br>(0.03 to 0.04)                    | -0.24<br>(-0.34 to -0.14) |
| Australasia                | 0.17<br>(0.11 to 0.26)                         | 0.82<br>(0.55 to 1.29)                    | 0.18<br>(0.12 to 0.28)                         | 0.63<br>(0.43 to 0.97)                    | -0.76<br>(-0.91 to -0.6)  |
| Caribbean                  | 0.01<br>(0.01 to 0.01)                         | 0.03<br>(0.02 to 0.04)                    | 0.01<br>(0.01 to 0.02)                         | 0.03<br>(0.02 to 0.03)                    | 0.02<br>(-0.07 to 0.11)   |
| Central Asia               | 2.08<br>(1.54 to 2.82)                         | 3.01<br>(2.23 to 4.08)                    | 1.62<br>(1.23 to 2.15)                         | 1.73<br>(1.31 to 2.3)                     | -1.19<br>(-1.54 to -0.84) |
| Central Europe             | 1.53<br>(1.03 to 2.33)                         | 1.24<br>(0.84 to 1.89)                    | 0.58<br>(0.41 to 0.89)                         | 0.51<br>(0.36 to 0.78)                    | -2.58<br>(-2.85 to -2.31) |
| Central Latin America      | 0.03<br>(0.02 to 0.05)                         | 0.02<br>(0.01 to 0.03)                    | 0.04<br>(0.02 to 0.06)                         | 0.02<br>(0.01 to 0.02)                    | -0.28<br>(-0.47 to -0.08) |
| Central Sub-Saharan Africa | 0.06<br>(0.04 to 0.09)                         | 0.11<br>(0.07 to 0.17)                    | 0.21<br>(0.12 to 0.32)                         | 0.16<br>(0.09 to 0.24)                    | 1.11<br>(0.9 to 1.32)     |
| East Asia                  | 101.64<br>(72.42 to 144.03)                    | 8.3<br>(5.91 to 11.76)                    | 60.56<br>(43.52 to 86.44)                      | 4.11<br>(2.96 to 5.87)                    | -2.36<br>(-2.86 to -1.85) |
| Eastern Europe             | 1.8<br>(1.25 to 2.64)                          | 0.79<br>(0.55 to 1.17)                    | 0.96<br>(0.7 to 1.37)                          | 0.46<br>(0.33 to 0.65)                    | -0.43<br>(-0.92 to 0.07)  |

|                                   |                         |                        |                           |                        |                           |
|-----------------------------------|-------------------------|------------------------|---------------------------|------------------------|---------------------------|
| Eastern<br>Sub-Saharan<br>Africa  | 0.62<br>(0.44 to 0.86)  | 0.33<br>(0.23 to 0.45) | 1.28<br>(0.9 to 1.73)     | 0.31<br>(0.22 to 0.42) | -0.38<br>(-0.49 to -0.27) |
| High-income Asia<br>Pacific       | 1.08<br>(0.78 to 1.57)  | 0.62<br>(0.45 to 0.9)  | 1.07<br>(0.78 to 1.52)    | 0.57<br>(0.42 to 0.81) | -0.26<br>(-0.8 to 0.29)   |
| High-income<br>North America      | 1.1<br>(0.84 to 1.48)   | 0.39<br>(0.3 to 0.53)  | 1.07<br>(0.87 to 1.38)    | 0.29<br>(0.24 to 0.38) | -0.69<br>(-0.85 to -0.52) |
| North Africa and<br>Middle East   | 9.15<br>(6.92 to 12.31) | 2.65<br>(2.01 to 3.57) | 9.76<br>(7.51 to 12.86)   | 1.6<br>(1.23 to 2.11)  | -1.66<br>(-1.74 to -1.58) |
| Oceania                           | 0.4<br>(0.26 to 0.55)   | 6.13<br>(4.05 to 8.51) | 0.73<br>(0.49 to 1.03)    | 5.5<br>(3.7 to 7.75)   | 0.56<br>(-0.19 to 1.33)   |
| South Asia                        | 27.3<br>(20.7 to 36.31) | 2.49<br>(1.89 to 3.31) | 38.3<br>(28.42 to 51.93)  | 2.12<br>(1.57 to 2.88) | -0.13<br>(-0.45 to 0.2)   |
| Southeast Asia                    | 41.53<br>(34.5 to 51.9) | 8.9<br>(7.39 to 11.12) | 31.21<br>(25.91 to 38.32) | 4.63<br>(3.85 to 5.69) | -2.13<br>(-2.2 to -2.06)  |
| Southern Latin<br>America         | 0.13<br>(0.09 to 0.2)   | 0.27<br>(0.17 to 0.41) | 0.12<br>(0.09 to 0.17)    | 0.18<br>(0.13 to 0.25) | -1.18<br>(-1.48 to -0.89) |
| Southern<br>Sub-Saharan<br>Africa | 0.03<br>(0.02 to 0.05)  | 0.07<br>(0.04 to 0.1)  | 0.08<br>(0.05 to 0.12)    | 0.1<br>(0.06 to 0.15)  | 1.36<br>(1.19 to 1.52)    |
| Tropical Latin<br>America         | 0.09<br>(0.06 to 0.12)  | 0.06<br>(0.04 to 0.08) | 0.08<br>(0.06 to 0.1)     | 0.03<br>(0.03 to 0.04) | -1.48<br>(-1.59 to -1.38) |
| Western Europe                    | 2.36<br>(1.72 to 3.12)  | 0.61<br>(0.45 to 0.81) | 1.88<br>(1.42 to 2.43)    | 0.43<br>(0.32 to 0.56) | -1.22<br>(-1.55 to -0.89) |
| Western<br>Sub-Saharan<br>Africa  | 0.95<br>(0.73 to 1.24)  | 0.49<br>(0.38 to 0.64) | 2.11<br>(1.6 to 2.69)     | 0.46<br>(0.35 to 0.59) | -0.3<br>(-0.43 to -0.18)  |

---

**Abbreviations:** EAPC, estimated annual percentage change; UI, uncertainty interval. CI, confidence interval.



**Supplementary Table S2.** The incident cases and incidence rates of thalassemias trait in 1990 and 2019, along with their temporal trend.

| Characteristics            | 1990                                           |                                           | 2019                                           |                                           | 1990-2019                 |
|----------------------------|------------------------------------------------|-------------------------------------------|------------------------------------------------|-------------------------------------------|---------------------------|
|                            | Incident cases<br>No.×10 <sup>3</sup> (95% UI) | Incidence rates<br>per 100000<br>(95% UI) | Incident cases<br>No.×10 <sup>3</sup> (95% UI) | Incidence rates<br>per 100000<br>(95% UI) | EAPC<br>(95%CI)           |
| <b>Global</b>              | 6910.25<br>(6002.38 to 8062.8)                 | 129.17<br>(112.2 to 150.71)               | 6337.27<br>(5491.79 to 7335.76)                | 81.9<br>(70.98 to 94.81)                  | -1.35<br>(-1.47 to -1.23) |
| <b>Sex</b>                 |                                                |                                           |                                                |                                           |                           |
| Male                       | 3798.41<br>(3302.11 to 4438.7)                 | 141.01<br>(122.58 to 164.78)              | 3547.49<br>(3067.29 to 4121.63)                | 91.41<br>(79.03 to 106.2)                 | -1.24<br>(-1.37 to -1.12) |
| Female                     | 3111.84<br>(2707.23 to 3621.25)                | 117.16<br>(101.93 to 136.34)              | 2789.78<br>(2430.36 to 3225.03)                | 72.34<br>(63.02 to 83.63)                 | -1.48<br>(-1.6 to -1.36)  |
| <b>Region</b>              |                                                |                                           |                                                |                                           |                           |
| Andean Latin America       | 8.72<br>(7.65 to 9.97)                         | 22.84<br>(20.05 to 26.11)                 | 10.78<br>(9.45 to 12.12)                       | 16.94<br>(14.85 to 19.06)                 | -0.96<br>(-1 to -0.93)    |
| Australasia                | 3.48<br>(3.07 to 3.96)                         | 17.14<br>(15.14 to 19.54)                 | 4.22<br>(3.75 to 4.73)                         | 14.52<br>(12.91 to 16.29)                 | -0.5<br>(-0.62 to -0.38)  |
| Caribbean                  | 5.52<br>(4.8 to 6.36)                          | 15.65<br>(13.6 to 18.03)                  | 6.2<br>(5.39 to 7.13)                          | 13.14<br>(11.43 to 15.11)                 | -0.59<br>(-0.62 to -0.55) |
| Central Asia               | 88.11<br>(76.24 to 102.68)                     | 127.21<br>(110.07 to 148.24)              | 87.64<br>(76.28 to 102.1)                      | 93.7<br>(81.56 to 109.16)                 | -0.36<br>(-0.71 to -0.02) |
| Central Europe             | 32.12<br>(27.34 to 38.65)                      | 26.12<br>(22.24 to 31.43)                 | 20.95<br>(17.88 to 24.82)                      | 18.34<br>(15.65 to 21.73)                 | -0.82<br>(-1.09 to -0.56) |
| Central Latin America      | 18.68<br>(13.54 to 25)                         | 11.38<br>(8.25 to 15.23)                  | 19.14<br>(14.52 to 24.57)                      | 7.66<br>(5.81 to 9.83)                    | -1.39<br>(-1.43 to -1.35) |
| Central Sub-Saharan Africa | 21.48<br>(17.89 to 25.41)                      | 38.68<br>(32.21 to 45.77)                 | 45.21<br>(37.27 to 53.84)                      | 34.37<br>(28.34 to 40.93)                 | -0.39<br>(-0.55 to -0.24) |
| East Asia                  | 2592.39<br>(2205.53 to 3108.19)                | 211.6<br>(180.02 to 253.7)                | 1500.93<br>(1283.84 to 1777.41)                | 101.95<br>(87.21 to 120.73)               | -2.29<br>(-2.83 to -1.74) |

|                                   |                                 |                              |                                 |                              |                           |
|-----------------------------------|---------------------------------|------------------------------|---------------------------------|------------------------------|---------------------------|
| Eastern Europe                    | 74.77<br>(62.24 to 91.6)        | 33.01<br>(27.48 to 40.44)    | 61.16<br>(51.19 to 74.1)        | 29.13<br>(24.38 to 35.29)    | 0.98<br>(0.5 to 1.46)     |
| Eastern<br>Sub-Saharan<br>Africa  | 113.12<br>(96.03 to 131.05)     | 59.49<br>(50.5 to 68.91)     | 203.88<br>(173.25 to 236.97)    | 49.51<br>(42.07 to 57.55)    | -0.81<br>(-0.9 to -0.71)  |
| High-income Asia<br>Pacific       | 27.25<br>(21.04 to 33.88)       | 15.7<br>(12.13 to 19.52)     | 26.05<br>(20.85 to 31.16)       | 13.91<br>(11.13 to 16.64)    | -0.18<br>(-0.72 to 0.37)  |
| High-income<br>North America      | 90.37<br>(77.65 to 105)         | 32.17<br>(27.64 to 37.38)    | 88.32<br>(79.01 to 98.97)       | 24.23<br>(21.67 to 27.15)    | -0.69<br>(-0.83 to -0.55) |
| North Africa and<br>Middle East   | 673.7<br>(592.9 to 772.2)       | 195.26<br>(171.84 to 223.81) | 721.7<br>(639.68 to 818.46)     | 118.56<br>(105.09 to 134.46) | -1.65<br>(-1.71 to -1.59) |
| Oceania                           | 15.27<br>(13.08 to 17.5)        | 235.95<br>(202.1 to 270.43)  | 30.55<br>(26.35 to 35.11)       | 230.09<br>(198.47 to 264.44) | 0.19<br>(-0.03 to 0.41)   |
| South Asia                        | 1939.35<br>(1658.74 to 2266.66) | 176.69<br>(151.12 to 206.51) | 2219.25<br>(1883.56 to 2617.53) | 122.94<br>(104.34 to 145)    | -1.02<br>(-1.22 to -0.81) |
| Southeast Asia                    | 862.28<br>(769.55 to 972.62)    | 184.72<br>(164.86 to 208.36) | 787.29<br>(702.45 to 891.94)    | 116.85<br>(104.25 to 132.38) | -1.45<br>(-1.52 to -1.39) |
| Southern Latin<br>America         | 5.01<br>(4.37 to 5.77)          | 10.1<br>(8.83 to 11.66)      | 8.58<br>(7.41 to 9.78)          | 12.85<br>(11.1 to 14.65)     | 1.39<br>(1.06 to 1.73)    |
| Southern<br>Sub-Saharan<br>Africa | 11.95<br>(10.14 to 14.04)       | 22.77<br>(19.32 to 26.75)    | 16.64<br>(13.67 to 19.63)       | 21.17<br>(17.4 to 24.99)     | -0.16<br>(-0.25 to -0.08) |
| Tropical Latin<br>America         | 28.76<br>(24.4 to 33.58)        | 18.81<br>(15.96 to 21.96)    | 26.16<br>(22.34 to 30.07)       | 11.7<br>(9.99 to 13.45)      | -1.45<br>(-1.52 to -1.37) |
| Western Europe                    | 136.73<br>(118.77 to 156.38)    | 35.55<br>(30.88 to 40.66)    | 122<br>(106.57 to 138.61)       | 27.96<br>(24.43 to 31.77)    | -0.77<br>(-0.94 to -0.59) |
| Western<br>Sub-Saharan<br>Africa  | 161.2<br>(140.25 to 187.33)     | 83.71<br>(72.83 to 97.28)    | 330.63<br>(287.22 to 379.33)    | 72.46<br>(62.94 to 83.13)    | -0.56<br>(-0.67 to -0.45) |

---

**Abbreviations:** EAPC, estimated annual percentage change; UI, uncertainty interval. CI, confidence interval.

**Supplementary Table S3.** The incident cases and incidence rates of sickle cell disorders in 1990 and 2019, along with their temporal trend.

| Characteristics            | 1990                                           |                                           | 2019                                           |                                           | 1990-2019                 |
|----------------------------|------------------------------------------------|-------------------------------------------|------------------------------------------------|-------------------------------------------|---------------------------|
|                            | Incident cases<br>No.×10 <sup>3</sup> (95% UI) | Incidence rates<br>per 100000<br>(95% UI) | Incident cases<br>No.×10 <sup>3</sup> (95% UI) | Incidence rates<br>per 100000<br>(95% UI) | EAPC<br>(95%CI)           |
| <b>Global</b>              | 474.73<br>(373.95 to 596)                      | 8.87<br>(6.99 to 11.14)                   | 605.01<br>(466.3 to 780.99)                    | 7.82<br>(6.03 to 10.09)                   | -0.31<br>(-0.42 to -0.19) |
| <b>Sex</b>                 |                                                |                                           |                                                |                                           |                           |
| Male                       | 259.08<br>(207.08 to 319.81)                   | 9.62<br>(7.69 to 11.87)                   | 305.82<br>(236.65 to 393.15)                   | 7.88<br>(6.1 to 10.13)                    | -0.41<br>(-0.53 to -0.29) |
| Female                     | 215.65<br>(165.67 to 278.46)                   | 8.12<br>(6.24 to 10.48)                   | 299.2<br>(229.39 to 387.34)                    | 7.76<br>(5.95 to 10.04)                   | -0.2<br>(-0.34 to -0.06)  |
| <b>Region</b>              |                                                |                                           |                                                |                                           |                           |
| Andean Latin America       | 0.06<br>(0.05 to 0.09)                         | 0.16<br>(0.12 to 0.22)                    | 0.08<br>(0.06 to 0.11)                         | 0.12<br>(0.09 to 0.17)                    | -0.86<br>(-0.92 to -0.8)  |
| Australasia                | 0.5<br>(0.33 to 0.76)                          | 2.48<br>(1.62 to 3.73)                    | 0.14<br>(0.1 to 0.19)                          | 0.47<br>(0.33 to 0.66)                    | -7<br>(-9.16 to -4.79)    |
| Caribbean                  | 3.53<br>(2.97 to 4.18)                         | 10<br>(8.42 to 11.85)                     | 3.92<br>(3.3 to 4.76)                          | 8.31<br>(6.99 to 10.08)                   | -0.62<br>(-0.77 to -0.47) |
| Central Asia               | 0.01<br>(0.01 to 0.02)                         | 0.02<br>(0.01 to 0.02)                    | 0.01<br>(0.01 to 0.02)                         | 0.01<br>(0.01 to 0.02)                    | -0.45<br>(-0.78 to -0.11) |
| Central Europe             | 0.16<br>(0.12 to 0.21)                         | 0.13<br>(0.1 to 0.17)                     | 0.11<br>(0.08 to 0.14)                         | 0.1<br>(0.07 to 0.13)                     | -0.84<br>(-1.05 to -0.64) |
| Central Latin America      | 0.48<br>(0.37 to 0.63)                         | 0.29<br>(0.22 to 0.38)                    | 0.29<br>(0.21 to 0.38)                         | 0.12<br>(0.08 to 0.15)                    | -3.04<br>(-3.17 to -2.9)  |
| Central Sub-Saharan Africa | 39.66<br>(31.37 to 49.56)                      | 71.43<br>(56.5 to 89.27)                  | 73.44<br>(59.26 to 92.12)                      | 55.83<br>(45.05 to 70.03)                 | -0.76<br>(-0.96 to -0.56) |
| East Asia                  | 1.13<br>(0.78 to 1.61)                         | 0.09<br>(0.06 to 0.13)                    | 0.51<br>(0.36 to 0.71)                         | 0.03<br>(0.02 to 0.05)                    | -3.5<br>(-4.16 to -2.83)  |
| Eastern Europe             | 0.02<br>(0.01 to 0.03)                         | 0.01<br>(0.01 to 0.01)                    | 0.02<br>(0.01 to 0.02)                         | 0.01<br>(0 to 0.01)                       | 0.92<br>(0.46 to 1.38)    |

|                              |                             |                             |                              |                           |                            |
|------------------------------|-----------------------------|-----------------------------|------------------------------|---------------------------|----------------------------|
| Eastern Sub-Saharan Africa   | 40.22<br>(30.96 to 52.61)   | 21.15<br>(16.28 to 27.66)   | 55.47<br>(43.1 to 71.18)     | 13.47<br>(10.47 to 17.28) | -1.51<br>(-1.63 to -1.38)  |
| High-income Asia Pacific     | 0.01<br>(0.01 to 0.02)      | 0.01<br>(0 to 0.01)         | 0.01<br>(0.01 to 0.01)       | 0<br>(0 to 0.01)          | -1.48<br>(-1.57 to -1.4)   |
| High-income North America    | 43.77<br>(32.67 to 58.09)   | 15.58<br>(11.63 to 20.68)   | 1.7<br>(1.52 to 1.89)        | 0.47<br>(0.42 to 0.52)    | -8.16<br>(-10.49 to -5.77) |
| North Africa and Middle East | 25.73<br>(22.24 to 30.11)   | 7.46<br>(6.44 to 8.73)      | 19.47<br>(16.06 to 23.54)    | 3.2<br>(2.64 to 3.87)     | -3.15<br>(-3.42 to -2.88)  |
| Oceania                      | 0<br>(0 to 0)               | 0<br>(0 to 0.01)            | 0<br>(0 to 0)                | 0<br>(0 to 0.01)          | 0<br>(-0.12 to 0.11)       |
| South Asia                   | 111.89<br>(75.34 to 162.73) | 10.19<br>(6.86 to 14.83)    | 124.43<br>(83.25 to 179.19)  | 6.89<br>(4.61 to 9.93)    | -1.46<br>(-1.8 to -1.12)   |
| Southeast Asia               | 0.1<br>(0.08 to 0.15)       | 0.02<br>(0.02 to 0.03)      | 0.09<br>(0.07 to 0.13)       | 0.01<br>(0.01 to 0.02)    | -1.65<br>(-1.72 to -1.59)  |
| Southern Latin America       | 0<br>(0 to 0)               | 0<br>(0 to 0.01)            | 0<br>(0 to 0)                | 0<br>(0 to 0)             | -0.93<br>(-1.08 to -0.79)  |
| Southern Sub-Saharan Africa  | 0.21<br>(0.17 to 0.27)      | 0.41<br>(0.32 to 0.52)      | 0.2<br>(0.15 to 0.26)        | 0.26<br>(0.2 to 0.33)     | -1.87<br>(-2.06 to -1.68)  |
| Tropical Latin America       | 0.92<br>(0.75 to 1.12)      | 0.6<br>(0.49 to 0.73)       | 0.83<br>(0.69 to 1.01)       | 0.37<br>(0.31 to 0.45)    | -2.04<br>(-2.19 to -1.89)  |
| Western Europe               | 8.41<br>(6.16 to 11.3)      | 2.19<br>(1.6 to 2.94)       | 1.44<br>(1.11 to 1.84)       | 0.33<br>(0.26 to 0.42)    | -5.04<br>(-6.17 to -3.9)   |
| Western Sub-Saharan Africa   | 197.91<br>(158.6 to 246.78) | 102.77<br>(82.35 to 128.14) | 322.85<br>(248.23 to 412.82) | 70.75<br>(54.4 to 90.47)  | -1.4<br>(-1.5 to -1.3)     |

---

**Abbreviations:** EAPC, estimated annual percentage change; UI, uncertainty interval. CI, confidence interval.



**Supplementary Table S4.** The incident cases and incidence rates of sickle cell trait in 1990 and 2019, along with their temporal trend.

| Characteristics            | 1990                                           |                                           | 2019                                           |                                           | 1990-2019                 |
|----------------------------|------------------------------------------------|-------------------------------------------|------------------------------------------------|-------------------------------------------|---------------------------|
|                            | Incident cases<br>No.×10 <sup>3</sup> (95% UI) | Incidence rates<br>per 100000<br>(95% UI) | Incident cases<br>No.×10 <sup>3</sup> (95% UI) | Incidence rates<br>per 100000<br>(95% UI) | EAPC<br>(95%CI)           |
| <b>Global</b>              | 8662.5<br>(7659.58 to 9796.58)                 | 161.92<br>(143.17 to 183.12)              | 10113.13<br>(8915.24 to 11439.3)               | 130.7<br>(115.22 to 147.84)               | -0.65<br>(-0.73 to -0.57) |
| <b>Sex</b>                 |                                                |                                           |                                                |                                           |                           |
| Male                       | 4481.61<br>(3959.48 to 5054)                   | 166.37<br>(146.99 to 187.62)              | 5133<br>(4526.28 to 5817.39)                   | 132.26<br>(116.63 to 149.89)              | -0.65<br>(-0.74 to -0.57) |
| Female                     | 4180.89<br>(3684.59 to 4746.43)                | 157.41<br>(138.72 to 178.7)               | 4980.13<br>(4393.39 to 5628.01)                | 129.14<br>(113.92 to 145.94)              | -0.65<br>(-0.73 to -0.57) |
| <b>Region</b>              |                                                |                                           |                                                |                                           |                           |
| Andean Latin America       | 16.67<br>(14.11 to 19.62)                      | 43.66<br>(36.95 to 51.38)                 | 19.61<br>(16.68 to 22.99)                      | 30.83<br>(26.23 to 36.15)                 | -1.12<br>(-1.16 to -1.07) |
| Australasia                | 8.09<br>(6.87 to 9.58)                         | 39.9<br>(33.89 to 47.22)                  | 5.89<br>(5.07 to 6.91)                         | 20.28<br>(17.45 to 23.78)                 | -2.49<br>(-3.17 to -1.8)  |
| Caribbean                  | 85.42<br>(76.98 to 94.85)                      | 242.17<br>(218.24 to 268.88)              | 87.65<br>(78.8 to 97.96)                       | 185.84<br>(167.07 to 207.69)              | -0.86<br>(-0.98 to -0.75) |
| Central Asia               | 9.11<br>(7.29 to 11.19)                        | 13.16<br>(10.52 to 16.15)                 | 8.82<br>(7.04 to 10.76)                        | 9.43<br>(7.53 to 11.5)                    | -0.46<br>(-0.8 to -0.13)  |
| Central Europe             | 30.27<br>(26.2 to 34.72)                       | 24.61<br>(21.31 to 28.23)                 | 20.13<br>(17.32 to 23.09)                      | 17.62<br>(15.16 to 20.21)                 | -0.8<br>(-1.02 to -0.58)  |
| Central Latin America      | 47.35<br>(40.41 to 56.26)                      | 28.85<br>(24.62 to 34.28)                 | 30.8<br>(26.42 to 36.51)                       | 12.32<br>(10.57 to 14.6)                  | -2.79<br>(-2.9 to -2.69)  |
| Central Sub-Saharan Africa | 550.82<br>(495.39 to 609.03)                   | 992.11<br>(892.28 to 1096.95)             | 960.08<br>(872.88 to 1062.1)                   | 729.86<br>(663.56 to 807.41)              | -0.96<br>(-1.13 to -0.79) |
| East Asia                  | 313.85<br>(258.22 to 377.77)                   | 25.62<br>(21.08 to 30.84)                 | 164.15<br>(137.37 to 196.44)                   | 11.15<br>(9.33 to 13.34)                  | -2.81<br>(-3.4 to -2.22)  |

|                                   |                                    |                                  |                                    |                              |                           |
|-----------------------------------|------------------------------------|----------------------------------|------------------------------------|------------------------------|---------------------------|
| Eastern Europe                    | 14.12<br>(11.42 to 17.14)          | 6.24<br>(5.04 to 7.57)           | 11.24<br>(9.18 to 13.64)           | 5.35<br>(4.37 to 6.5)        | 0.91<br>(0.43 to 1.39)    |
| Eastern<br>Sub-Saharan<br>Africa  | 813.24<br>(732.67 to 906.27)       | 427.64<br>(385.28 to 476.56)     | 1217.76<br>(1105.38 to<br>1350.7)  | 295.73<br>(268.44 to 328.02) | -1.3<br>(-1.41 to -1.19)  |
| High-income Asia<br>Pacific       | 6.41<br>(4.96 to 8.03)             | 3.69<br>(2.86 to 4.63)           | 4.5<br>(3.57 to 5.54)              | 2.4<br>(1.91 to 2.96)        | -1.39<br>(-1.47 to -1.31) |
| High-income<br>North America      | 525.73<br>(471.79 to 584.4)        | 187.14<br>(167.94 to 208.03)     | 118.78<br>(111.47 to 126.88)       | 32.58<br>(30.58 to 34.8)     | -4.16<br>(-5.13 to -3.18) |
| North Africa and<br>Middle East   | 894.65<br>(826.66 to 975.47)       | 259.3<br>(239.59 to 282.72)      | 843.71<br>(771.36 to 926.26)       | 138.61<br>(126.72 to 152.17) | -2.21<br>(-2.31 to -2.1)  |
| Oceania                           | 0.31<br>(0.14 to 0.49)             | 4.87<br>(2.15 to 7.57)           | 0.61<br>(0.26 to 1.02)             | 4.6<br>(1.95 to 7.69)        | -0.12<br>(-0.2 to -0.03)  |
| South Asia                        | 3217.47<br>(2690.66 to<br>3833.2)  | 293.13<br>(245.13 to 349.23)     | 3184.15<br>(2666.87 to<br>3774.71) | 176.39<br>(147.73 to 209.1)  | -1.8<br>(-1.98 to -1.62)  |
| Southeast Asia                    | 67.6<br>(57.73 to 79.23)           | 14.48<br>(12.37 to 16.97)        | 58.63<br>(50.1 to 68.68)           | 8.7<br>(7.44 to 10.19)       | -1.65<br>(-1.71 to -1.59) |
| Southern Latin<br>America         | 1.95<br>(1.1 to 2.95)              | 3.94<br>(2.22 to 5.95)           | 1.84<br>(1.06 to 2.75)             | 2.76<br>(1.58 to 4.12)       | -0.95<br>(-1.09 to -0.81) |
| Southern<br>Sub-Saharan<br>Africa | 27.27<br>(23.72 to 31.4)           | 51.95<br>(45.18 to 59.81)        | 28.44<br>(24.6 to 32.88)           | 36.19<br>(31.3 to 41.85)     | -1.23<br>(-1.3 to -1.16)  |
| Tropical Latin<br>America         | 79.62<br>(71.23 to 88.77)          | 52.08<br>(46.59 to 58.07)        | 80.92<br>(72.94 to 89.7)           | 36.19<br>(32.62 to 40.12)    | -1.1<br>(-1.18 to -1.02)  |
| Western Europe                    | 174.09<br>(153.59 to 197.35)       | 45.27<br>(39.94 to 51.31)        | 107.63<br>(91.74 to 124.9)         | 24.67<br>(21.03 to 28.63)    | -1.49<br>(-1.71 to -1.27) |
| Western<br>Sub-Saharan<br>Africa  | 1778.46<br>(1586.41 to<br>1983.54) | 923.49<br>(823.77 to<br>1029.98) | 3157.8<br>(2776.44 to<br>3575.19)  | 692.02<br>(608.45 to 783.49) | -1.03<br>(-1.14 to -0.92) |

---

**Abbreviations:** EAPC, estimated annual percentage change; UI, uncertainty interval. CI, confidence interval.

**Supplementary Table S5.** The incident cases and incidence rates of G6PD deficiency in 1990 and 2019, along with their temporal trend.

| Characteristics            | 1990                                           |                                           | 2019                                           |                                           | 1990-2019                 |
|----------------------------|------------------------------------------------|-------------------------------------------|------------------------------------------------|-------------------------------------------|---------------------------|
|                            | Incident cases<br>No.×10 <sup>3</sup> (95% UI) | Incidence rates<br>per 100000<br>(95% UI) | Incident cases<br>No.×10 <sup>3</sup> (95% UI) | Incidence rates<br>per 100000<br>(95% UI) | EAPC<br>(95%CI)           |
| <b>Global</b>              | 7484.69<br>(6819.44 to 8244.42)                | 139.9<br>(127.47 to 154.11)               | 8956.94<br>(8050.43 to 10025.58)               | 115.76<br>(104.04 to 129.57)              | -0.86<br>(-1.03 to -0.68) |
| <b>Sex</b>                 |                                                |                                           |                                                |                                           |                           |
| Male                       | 5432.72<br>(4961.98 to 5966.03)                | 201.68<br>(184.2 to 221.48)               | 6531.66<br>(5873.55 to 7257.53)                | 168.3<br>(151.34 to 187)                  | -0.86<br>(-0.99 to -0.73) |
| Female                     | 2051.97<br>(1854.5 to 2285.62)                 | 77.26<br>(69.82 to 86.05)                 | 2425.28<br>(2169.68 to 2729.62)                | 62.89<br>(56.26 to 70.78)                 | -0.83<br>(-1.16 to -0.5)  |
| <b>Region</b>              |                                                |                                           |                                                |                                           |                           |
| Andean Latin America       | 18.85<br>(14.68 to 23.81)                      | 49.38<br>(38.45 to 62.38)                 | 50.98<br>(39.97 to 64.12)                      | 80.17<br>(62.85 to 100.82)                | -0.67<br>(-1.37 to 0.03)  |
| Australasia                | 1.23<br>(0.96 to 1.55)                         | 6.09<br>(4.73 to 7.65)                    | 3.12<br>(2.42 to 3.87)                         | 10.74<br>(8.32 to 13.31)                  | 2.27<br>(1.44 to 3.11)    |
| Caribbean                  | 82.31<br>(63.87 to 101.95)                     | 233.36<br>(181.07 to 289.03)              | 83.9<br>(64.94 to 103.79)                      | 177.87<br>(137.67 to 220.04)              | -0.92<br>(-0.97 to -0.86) |
| Central Asia               | 27.02<br>(20.88 to 34.07)                      | 39.02<br>(30.14 to 49.19)                 | 26.68<br>(20.67 to 33.79)                      | 28.52<br>(22.1 to 36.13)                  | -0.34<br>(-0.69 to 0.01)  |
| Central Europe             | 55.25<br>(46.83 to 65.12)                      | 44.93<br>(38.09 to 52.95)                 | 40.29<br>(34.19 to 47.42)                      | 35.27<br>(29.93 to 41.51)                 | -1.39<br>(-1.78 to -1)    |
| Central Latin America      | 157.78<br>(134.53 to 185.49)                   | 96.14<br>(81.97 to 113.02)                | 104.85<br>(86.4 to 125.29)                     | 41.93<br>(34.56 to 50.11)                 | -2.81<br>(-2.98 to -2.63) |
| Central Sub-Saharan Africa | 356.1<br>(276.15 to 442.58)                    | 641.4<br>(497.38 to 797.15)               | 593.09<br>(460.02 to 740.72)                   | 450.87<br>(349.71 to 563.09)              | -1.19<br>(-1.33 to -1.04) |
| East Asia                  | 879.28<br>(844.9 to 914.01)                    | 71.77<br>(68.96 to 74.61)                 | 742.31<br>(707.82 to 775.12)                   | 50.42<br>(48.08 to 52.65)                 | -0.98<br>(-1.17 to -0.8)  |

|                                   |                                    |                              |                                    |                              |                           |
|-----------------------------------|------------------------------------|------------------------------|------------------------------------|------------------------------|---------------------------|
| Eastern Europe                    | 55.85<br>(52.93 to 58.7)           | 24.66<br>(23.37 to 25.92)    | 46.82<br>(44.52 to 49.1)           | 22.3<br>(21.2 to 23.38)      | 0.76<br>(0.28 to 1.23)    |
| Eastern<br>Sub-Saharan<br>Africa  | 924.64<br>(800.78 to<br>1066.89)   | 486.22<br>(421.09 to 561.03) | 1228.27<br>(1025.02 to<br>1453.69) | 298.28<br>(248.93 to 353.03) | -1.62<br>(-1.86 to -1.37) |
| High-income Asia<br>Pacific       | 8.07<br>(7.02 to 9.27)             | 4.65<br>(4.05 to 5.34)       | 5.78<br>(5.12 to 6.49)             | 3.08<br>(2.73 to 3.47)       | -2.02<br>(-2.25 to -1.78) |
| High-income<br>North America      | 231.31<br>(221.2 to 241)           | 82.34<br>(78.74 to 85.79)    | 178.51<br>(169.73 to 186.98)       | 48.97<br>(46.56 to 51.29)    | -1.87<br>(-2.79 to -0.93) |
| North Africa and<br>Middle East   | 689.15<br>(605.74 to 789.89)       | 199.74<br>(175.56 to 228.94) | 662.38<br>(532.51 to 814)          | 108.82<br>(87.48 to 133.72)  | -1.59<br>(-1.73 to -1.44) |
| Oceania                           | 13.81<br>(12.53 to 15.28)          | 213.5<br>(193.61 to 236.16)  | 23.65<br>(18.28 to 29.57)          | 178.15<br>(137.72 to 222.74) | -0.59<br>(-0.77 to -0.42) |
| South Asia                        | 1788.98<br>(1672.95 to<br>1917.76) | 162.99<br>(152.42 to 174.72) | 2450.22<br>(2330.59 to<br>2571.13) | 135.73<br>(129.1 to 142.43)  | -1.91<br>(-2.54 to -1.27) |
| Southeast Asia                    | 755.15<br>(678.87 to 837.98)       | 161.77<br>(145.43 to 179.52) | 486.8<br>(425.85 to 555.55)        | 72.25<br>(63.2 to 82.45)     | -2.37<br>(-2.6 to -2.13)  |
| Southern Latin<br>America         | 16.21<br>(12.5 to 20.19)           | 32.71<br>(25.23 to 40.75)    | 14.36<br>(11.08 to 18.27)          | 21.51<br>(16.6 to 27.36)     | -1.29<br>(-1.46 to -1.13) |
| Southern<br>Sub-Saharan<br>Africa | 139.66<br>(126.31 to 154.22)       | 266.05<br>(240.62 to 293.8)  | 140.31<br>(126.64 to 154.74)       | 178.57<br>(161.17 to 196.94) | -1.17<br>(-1.32 to -1.03) |
| Tropical Latin<br>America         | 94.73<br>(91.17 to 98.22)          | 61.97<br>(59.63 to 64.24)    | 110.09<br>(105.7 to 114.41)        | 49.24<br>(47.27 to 51.17)    | 0.08<br>(-0.43 to 0.6)    |
| Western Europe                    | 114.68<br>(99.16 to 132.11)        | 29.82<br>(25.78 to 34.35)    | 117.38<br>(101.36 to 135.77)       | 26.9<br>(23.23 to 31.12)     | -0.39<br>(-0.62 to -0.15) |
| Western<br>Sub-Saharan<br>Africa  | 1074.62<br>(994.62 to 1164.8)      | 558.01<br>(516.47 to 604.84) | 1847.16<br>(1666.24 to<br>2043.51) | 404.8<br>(365.15 to 447.83)  | -0.94<br>(-1.03 to -0.85) |

---

**Abbreviations:** EAPC, estimated annual percentage change; UI, uncertainty interval. CI, confidence interval.

**Supplementary Table S6.** The incident cases and incidence rates of G6PD trait in 1990 and 2019, along with their temporal trend.

| Characteristics            | 1990                                           |                                           | 2019                                           |                                           | 1990-2019                 |
|----------------------------|------------------------------------------------|-------------------------------------------|------------------------------------------------|-------------------------------------------|---------------------------|
|                            | Incident cases<br>No.×10 <sup>3</sup> (95% UI) | Incidence rates<br>per 100000<br>(95% UI) | Incident cases<br>No.×10 <sup>3</sup> (95% UI) | Incidence rates<br>per 100000<br>(95% UI) | EAPC<br>(95%CI)           |
| <b>Global</b>              | 17715.84<br>(17107 to 18350.29)                | 331.15<br>(319.77 to 343.01)              | 18731.78<br>(17994.33 to 19540.11)             | 242.09<br>(232.56 to 252.54)              | -1.09<br>(-1.2 to -0.99)  |
| <b>Sex</b>                 |                                                |                                           |                                                |                                           |                           |
| Male                       | -                                              | -                                         | -                                              | -                                         | -                         |
| Female                     | 17715.84<br>(17107 to 18350.29)                | 666.99<br>(644.07 to 690.87)              | 18731.78<br>(17994.33 to 19540.11)             | 485.72<br>(466.6 to 506.68)               | -1.11<br>(-1.22 to -1.01) |
| <b>Region</b>              |                                                |                                           |                                                |                                           |                           |
| Andean Latin America       | 142.97<br>(128.91 to 157.47)                   | 374.48<br>(337.67 to 412.47)              | 150.82<br>(135.61 to 166.57)                   | 237.16<br>(213.23 to 261.92)              | -1.52<br>(-1.56 to -1.48) |
| Australasia                | 13.68<br>(12.07 to 15.47)                      | 67.47<br>(59.5 to 76.31)                  | 10.75<br>(9.04 to 12.42)                       | 36.98<br>(31.11 to 42.72)                 | -1.86<br>(-2.32 to -1.4)  |
| Caribbean                  | 80.23<br>(71.83 to 89.37)                      | 227.46<br>(203.65 to 253.36)              | 68.44<br>(61.11 to 76.48)                      | 145.1<br>(129.55 to 162.15)               | -1.5<br>(-1.6 to -1.41)   |
| Central Asia               | 153.1<br>(136.23 to 170.56)                    | 221.03<br>(196.67 to 246.24)              | 145.32<br>(129.31 to 161.92)                   | 155.37<br>(138.25 to 173.12)              | -0.53<br>(-0.87 to -0.19) |
| Central Europe             | 121.72<br>(112.51 to 131.68)                   | 98.99<br>(91.49 to 107.09)                | 77.99<br>(72.05 to 84.2)                       | 68.28<br>(63.07 to 73.71)                 | -0.75<br>(-1.01 to -0.49) |
| Central Latin America      | 700.78<br>(667.16 to 735.59)                   | 426.98<br>(406.5 to 448.19)               | 511.95<br>(481.29 to 543.18)                   | 204.76<br>(192.5 to 217.25)               | -2.59<br>(-2.74 to -2.43) |
| Central Sub-Saharan Africa | 535.71<br>(494.97 to 573.38)                   | 964.91<br>(891.52 to 1032.74)             | 887.19<br>(817.8 to 948.45)                    | 674.44<br>(621.69 to 721.01)              | -1.13<br>(-1.28 to -0.98) |
| East Asia                  | 2464.26<br>(2419.84 to 2505.21)                | 201.14<br>(197.52 to 204.48)              | 1661.29<br>(1629.32 to 1691.57)                | 112.84<br>(110.67 to 114.9)               | -2.29<br>(-2.48 to -2.09) |



|                                   |                                    |                              |                                    |                              |                           |
|-----------------------------------|------------------------------------|------------------------------|------------------------------------|------------------------------|---------------------------|
| Eastern Europe                    | 217.63<br>(211.93 to 222.92)       | 96.08<br>(93.57 to 98.42)    | 169.86<br>(165.68 to 173.7)        | 80.9<br>(78.9 to 82.72)      | 0.89<br>(0.39 to 1.39)    |
| Eastern<br>Sub-Saharan<br>Africa  | 1705.33<br>(1622.09 to<br>1785.98) | 896.75<br>(852.99 to 939.17) | 2561.51<br>(2428.82 to<br>2695.75) | 622.06<br>(589.84 to 654.66) | -1.29<br>(-1.41 to -1.16) |
| High-income Asia<br>Pacific       | 97.43<br>(91.49 to 103.51)         | 56.15<br>(52.73 to 59.66)    | 60.19<br>(56.69 to 63.95)          | 32.14<br>(30.27 to 34.15)    | -2.02<br>(-2.14 to -1.91) |
| High-income<br>North America      | 475.31<br>(465.69 to 485.13)       | 169.2<br>(165.77 to 172.69)  | 449.23<br>(439.45 to 458.2)        | 123.23<br>(120.54 to 125.69) | -0.91<br>(-1.06 to -0.75) |
| North Africa and<br>Middle East   | 1790.5<br>(1682.72 to<br>1899.05)  | 518.94<br>(487.71 to 550.4)  | 1829.64<br>(1684.07 to<br>1972.42) | 300.57<br>(276.66 to 324.03) | -1.77<br>(-1.81 to -1.73) |
| Oceania                           | 27.29<br>(24.54 to 29.98)          | 421.83<br>(379.26 to 463.38) | 61.6<br>(55.79 to 67.52)           | 463.96<br>(420.23 to 508.55) | 0.01<br>(-0.19 to 0.22)   |
| South Asia                        | 4617.95<br>(4527.5 to 4717.5)      | 420.72<br>(412.48 to 429.79) | 4923.01<br>(4831.32 to<br>5012.66) | 272.71<br>(267.63 to 277.68) | -1.83<br>(-2.13 to -1.53) |
| Southeast Asia                    | 1704<br>(1627.07 to<br>1781.8)     | 365.05<br>(348.57 to 381.71) | 1258.5<br>(1201.71 to<br>1317.7)   | 186.78<br>(178.35 to 195.57) | -2.14<br>(-2.29 to -1.99) |
| Southern Latin<br>America         | 80.8<br>(71.79 to 90.45)           | 163.1<br>(144.92 to 182.58)  | 67.82<br>(60.01 to 76.25)          | 101.6<br>(89.9 to 114.23)    | -1.39<br>(-1.58 to -1.2)  |
| Southern<br>Sub-Saharan<br>Africa | 272.49<br>(263.39 to 281.79)       | 519.1<br>(501.76 to 536.81)  | 287.73<br>(277.45 to 297.64)       | 366.19<br>(353.1 to 378.79)  | -0.99<br>(-1.08 to -0.89) |
| Tropical Latin<br>America         | 407.88<br>(400.11 to 415.23)       | 266.8<br>(261.71 to 271.6)   | 377.95<br>(370.96 to 384.64)       | 169.03<br>(165.91 to 172.03) | -1.15<br>(-1.38 to -0.93) |
| Western Europe                    | 509.43<br>(477.26 to 543.5)        | 132.46<br>(124.1 to 141.32)  | 457<br>(427.34 to 488.02)          | 104.74<br>(97.94 to 111.85)  | -0.65<br>(-0.74 to -0.56) |
| Western<br>Sub-Saharan<br>Africa  | 1597.33<br>(1537.16 to<br>1658.99) | 829.44<br>(798.19 to 861.45) | 2714<br>(2586.26 to<br>2839.77)    | 594.77<br>(566.77 to 622.33) | -0.9<br>(-1.04 to -0.77)  |

G6PD deficiency is inherited in an X-linked pattern, data on G6PD trait was not collected.

**Abbreviations:** EAPC, estimated annual percentage change; UI, uncertainty interval. CI, confidence interval. G6PD, glucose-6-phosphate dehydrogenase.

**Supplementary Table S7.** The change of inherited anemias cases and incidence rates between 1990 and 2019 at national level, both sexes.

| <b>Regions</b> | <b>Causes</b>         | <b>Cases in<br/>1990<br/>No.×103<br/>(95% UI)</b> | <b>Cases in<br/>2019<br/>No.×103<br/>(95% UI)</b> | <b>Change in<br/>absolute<br/>number<br/>(%)</b> | <b>Rates in<br/>1990 per<br/>100000<br/>(95% UI)</b> | <b>Rates in<br/>2019 per<br/>100000<br/>(95% UI)</b> | <b>EAPC<br/>from 1990<br/>and 2019<br/>(95%CI)</b> |
|----------------|-----------------------|---------------------------------------------------|---------------------------------------------------|--------------------------------------------------|------------------------------------------------------|------------------------------------------------------|----------------------------------------------------|
| Afghanistan    | Inherited anemias     | 148<br>(136 to 161)                               | 427<br>(392 to 464)                               | 1.88<br>(1.83 to 1.95)                           | 1298.78<br>(1191.73 to 1413.21)                      | 1116.16<br>(1024.25 to 1212.88)                      | -1.19<br>(-1.4 to -0.97)                           |
| Afghanistan    | Thalassemias          | 0<br>(0 to 1)                                     | 1<br>(1 to 2)                                     | 1.99<br>(1.7 to 2.32)                            | 3.89<br>(3 to 5.14)                                  | 3.47<br>(2.68 to 4.55)                               | -0.93<br>(-1.09 to -0.77)                          |
| Afghanistan    | Thalassemias trait    | 32<br>(28 to 37)                                  | 95<br>(84 to 108)                                 | 1.97<br>(1.84 to 2.12)                           | 280.25<br>(248.44 to 320.42)                         | 248.61<br>(220.26 to 282.42)                         | -0.93<br>(-1.09 to -0.77)                          |
| Afghanistan    | Sickle cell disorders | 1<br>(1 to 1)                                     | 2<br>(2 to 3)                                     | 1.85<br>(1.62 to 2.14)                           | 7.27<br>(5.51 to 9.44)                               | 6.18<br>(4.59 to 8.01)                               | -1.12<br>(-1.29 to -0.94)                          |
| Afghanistan    | Sickle cell trait     | 40<br>(35 to 45)                                  | 113<br>(99 to 129)                                | 1.84<br>(1.73 to 1.98)                           | 349.59<br>(306.49 to 397.25)                         | 296.28<br>(257.44 to 336.68)                         | -1.09<br>(-1.25 to -0.93)                          |
| Afghanistan    | G6PD deficiency       | 19<br>(15 to 24)                                  | 54<br>(41 to 67)                                  | 1.85<br>(1.63 to 2.07)                           | 164.59<br>(126.99 to 207.03)                         | 140.12<br>(108.36 to 175.13)                         | -1.41<br>(-1.7 to -1.12)                           |
| Afghanistan    | G6PD trait            | 56<br>(50 to 62)                                  | 161<br>(144 to 177)                               | 1.86<br>(1.77 to 1.97)                           | 493.17<br>(440.43 to 542.65)                         | 421.49<br>(376.94 to 463.22)                         | -1.35<br>(-1.64 to -1.05)                          |
| Albania        | Inherited anemias     | 17<br>(15 to 18)                                  | 7<br>(6 to 8)                                     | -0.57<br>(-0.57 to -0.56)                        | 499.45<br>(450.37 to 553.6)                          | 263.14<br>(237.45 to 291.41)                         | -2.59<br>(-2.9 to -2.28)                           |
| Albania        | Thalassemias          | 0<br>(0 to 0)                                     | 0<br>(0 to 0)                                     | -0.69<br>(-0.72 to -0.65)                        | 4.19<br>(3.04 to 5.96)                               | 1.58<br>(1.2 to 2.12)                                | -3.51<br>(-3.85 to -3.18)                          |
| Albania        | Thalassemias trait    | 4<br>(4 to 5)                                     | 2<br>(2 to 2)                                     | -0.57<br>(-0.59 to -0.55)                        | 131.04<br>(112.02 to 152.1)                          | 68.47<br>(59.26 to 78.6)                             | -2.45<br>(-2.78 to -2.11)                          |
| Albania        | Sickle cell disorders | 0<br>(0 to 0)                                     | 0<br>(0 to 0)                                     | -0.51<br>(-0.55 to -0.46)                        | 0.53<br>(0.41 to 0.69)                               | 0.32<br>(0.24 to 0.4)                                | -2.16<br>(-2.49 to -1.82)                          |
| Albania        | Sickle cell trait     | 2<br>(2 to 3)                                     | 1<br>(1 to 1)                                     | -0.55<br>(-0.57 to -0.52)                        | 72.68<br>(63.4 to 83.14)                             | 40.12<br>(35.09 to 45.49)                            | -2.33<br>(-2.65 to -2.01)                          |
| Albania        | G6PD deficiency       | 3<br>(2 to 4)                                     | 1<br>(1 to 2)                                     | -0.54<br>(-0.54 to -0.54)                        | 96.21<br>(74.26 to 120.53)                           | 53.99<br>(41.68 to 67.65)                            | -3.17<br>(-3.52 to -2.81)                          |

| <b>Regions</b>    | <b>Causes</b>               | <b>Cases in<br/>1990<br/>No.×103<br/>(95% UI)</b> | <b>Cases in<br/>2019<br/>No.×103<br/>(95% UI)</b> | <b>Change in<br/>absolute<br/>number<br/>(%)</b> | <b>Rates in<br/>1990 per<br/>100000<br/>(95% UI)</b> | <b>Rates in<br/>2019 per<br/>100000<br/>(95% UI)</b> | <b>EAPC<br/>from 1990<br/>and 2019<br/>(95%CI)</b> |
|-------------------|-----------------------------|---------------------------------------------------|---------------------------------------------------|--------------------------------------------------|------------------------------------------------------|------------------------------------------------------|----------------------------------------------------|
| Albania           | G6PD trait                  | 6<br>(6 to 7)                                     | 3<br>(2 to 3)                                     | -0.58<br>(-0.58 to<br>-0.58)                     | 194.8<br>(172.06 to<br>218.68)                       | 98.66<br>(87.15 to<br>110.76)                        | -2.53<br>(-2.87 to<br>-2.19)                       |
| Algeria           | Inherited<br>anemias        | 218<br>(194 to<br>245)                            | 247<br>(220 to<br>276)                            | 0.13<br>(0.11 to<br>0.16)                        | 863.16<br>(765.86 to<br>967.67)                      | 590.38<br>(524.71 to<br>660.55)                      | -0.8<br>(-1.02 to<br>-0.58)                        |
| Algeria           | Thalassemi<br>as            | 0<br>(0 to 0)                                     | 0<br>(0 to 1)                                     | 0.24<br>(0.13 to<br>0.36)                        | 1.37<br>(1.06 to<br>1.77)                            | 1.02<br>(0.8 to<br>1.3)                              | -0.51<br>(-0.74 to<br>-0.28)                       |
| Algeria           | Thalassemi<br>as trait      | 35<br>(31 to 40)                                  | 42<br>(38 to 48)                                  | 0.22<br>(0.16 to<br>0.27)                        | 137.45<br>(121.98 to<br>156.37)                      | 100.96<br>(89.67 to<br>113.65)                       | -0.56<br>(-0.78 to<br>-0.33)                       |
| Algeria           | Sickle<br>cell<br>disorders | 0<br>(0 to 0)                                     | 0<br>(0 to 0)                                     | 0.17<br>(0.1 to<br>0.23)                         | 0.77<br>(0.64 to<br>0.92)                            | 0.54<br>(0.46 to<br>0.64)                            | -0.71<br>(-0.95 to<br>-0.47)                       |
| Algeria           | Sickle<br>cell trait        | 23<br>(21 to 25)                                  | 27<br>(24 to 29)                                  | 0.16<br>(0.13 to<br>0.19)                        | 91.41<br>(83.26 to<br>100.18)                        | 64.01<br>(58.43 to<br>69.75)                         | -0.71<br>(-0.95 to<br>-0.48)                       |
| Algeria           | G6PD<br>deficiency          | 68<br>(52 to 84)                                  | 75<br>(57 to 92)                                  | 0.1<br>(0.01 to<br>0.18)                         | 268.12<br>(207.27 to<br>333)                         | 178.12<br>(137.22 to<br>219.39)                      | -0.93<br>(-1.14 to<br>-0.71)                       |
| Algeria           | G6PD trait                  | 92<br>(83 to 102)                                 | 103<br>(92 to 114)                                | 0.12<br>(0.1 to<br>0.15)                         | 364.03<br>(327.58 to<br>401.7)                       | 245.71<br>(220.9 to<br>271.52)                       | -0.82<br>(-1.04 to<br>-0.59)                       |
| American<br>Samoa | Inherited<br>anemias        | 0<br>(0 to 0)                                     | 0<br>(0 to 0)                                     | -0.33<br>(-0.35 to<br>-0.3)                      | 751.12<br>(668.13 to<br>839.8)                       | 442.37<br>(391.95 to<br>495.8)                       | -2.01<br>(-2.21 to<br>-1.8)                        |
| American<br>Samoa | Thalassemi<br>as            | 0<br>(0 to 0)                                     | 0<br>(0 to 0)                                     | -0.46<br>(-0.53 to<br>-0.38)                     | 3.45<br>(1.87 to<br>5.33)                            | 1.64<br>(0.88 to<br>2.57)                            | -1.62<br>(-2.57 to<br>-0.66)                       |
| American<br>Samoa | Thalassemi<br>as trait      | 0<br>(0 to 0)                                     | 0<br>(0 to 0)                                     | -0.41<br>(-0.45 to<br>-0.37)                     | 112.74<br>(86.59 to<br>138.13)                       | 57.99<br>(44.21 to<br>71.29)                         | -2.04<br>(-2.41 to<br>-1.65)                       |
| American<br>Samoa | Sickle<br>cell<br>disorders | 0<br>(0 to 0)                                     | 0<br>(0 to 0)                                     | -0.37<br>(-0.4 to<br>-0.03)                      | 0<br>(0 to 0)                                        | 0<br>(0 to 0)                                        | -2.28<br>(-2.38 to<br>-2.19)                       |
| American<br>Samoa | Sickle<br>cell trait        | 0<br>(0 to 0)                                     | 0<br>(0 to 0)                                     | -0.38<br>(-0.4 to<br>-0.16)                      | 4.41<br>(1.94 to<br>7.06)                            | 2.38<br>(1.02 to<br>3.81)                            | -2.33<br>(-2.41 to<br>-2.24)                       |
| American<br>Samoa | G6PD<br>deficiency          | 0<br>(0 to 0)                                     | 0<br>(0 to 0)                                     | -0.26<br>(-0.29 to<br>-0.24)                     | 154.65<br>(119.52 to<br>192.81)                      | 99.36<br>(76.79 to<br>123.49)                        | -1.79<br>(-2.05 to<br>-1.52)                       |
| American          | G6PD trait                  | 0                                                 | 0                                                 | -0.32                                            | 475.87                                               | 281                                                  | -2.09                                              |

| Regions | Causes                      | Cases in<br>1990<br>No.×103<br>(95% UI) | Cases in<br>2019<br>No.×103<br>(95% UI) | Change in<br>absolute<br>number<br>(%) | Rates in<br>1990 per<br>100000<br>(95% UI) | Rates in<br>2019 per<br>100000<br>(95% UI) | EAPC<br>from 1990<br>and 2019<br>(95%CI) |
|---------|-----------------------------|-----------------------------------------|-----------------------------------------|----------------------------------------|--------------------------------------------|--------------------------------------------|------------------------------------------|
| Samoa   |                             | (0 to 0)                                | (0 to 0)                                | (−0.35 to<br>−0.3)                     | (428.14 to<br>524.86)                      | (254.05 to<br>308.17)                      | (−2.29 to<br>−1.89)                      |
| Andorra | Inherited<br>anemias        | 0<br>(0 to 0)                           | 0<br>(0 to 0)                           | 0<br>(−0.03 to<br>0.03)                | 204.27<br>(183.16 to<br>226.19)            | 132.66<br>(118.72 to<br>147.75)            | −1.62<br>(−1.85 to<br>−1.39)             |
| Andorra | Thalassemi<br>as            | 0<br>(0 to 0)                           | 0<br>(0 to 0)                           | −0.07<br>(−0.2 to<br>0.06)             | 0.14<br>(0.09 to<br>0.19)                  | 0.08<br>(0.06 to<br>0.12)                  | −2.69<br>(−3.55 to<br>−1.83)             |
| Andorra | Thalassemi<br>as trait      | 0<br>(0 to 0)                           | 0<br>(0 to 0)                           | 0.02<br>(−0.04 to<br>0.09)             | 17.64<br>(15.16 to<br>20.17)               | 11.71<br>(10.1 to<br>13.43)                | −1.75<br>(−2.08 to<br>−1.42)             |
| Andorra | Sickle<br>cell<br>disorders | 0<br>(0 to 0)                           | 0<br>(0 to 0)                           | −0.04<br>(−0.13 to<br>0.04)            | 0.16<br>(0.12 to<br>0.21)                  | 0.1<br>(0.07 to<br>0.13)                   | −1.79<br>(−2.09 to<br>−1.49)             |
| Andorra | Sickle<br>cell trait        | 0<br>(0 to 0)                           | 0<br>(0 to 0)                           | −0.03<br>(−0.09 to<br>0.03)            | 21.48<br>(17.85 to<br>25.74)               | 13.53<br>(11.26 to<br>16.07)               | −1.73<br>(−2 to<br>−1.46)                |
| Andorra | G6PD<br>deficiency          | 0<br>(0 to 0)                           | 0<br>(0 to 0)                           | 0.05<br>(0.01 to<br>0.11)              | 32.26<br>(25.06 to<br>39.91)               | 22.02<br>(16.94 to<br>27.64)               | −1.46<br>(−1.64 to<br>−1.28)             |
| Andorra | G6PD trait                  | 0<br>(0 to 0)                           | 0<br>(0 to 0)                           | −0.01<br>(−0.05 to<br>0.03)            | 132.59<br>(118.85 to<br>146.78)            | 85.22<br>(76.27 to<br>94.26)               | −1.62<br>(−1.85 to<br>−1.4)              |
| Angola  | Inherited<br>anemias        | 269<br>(245 to<br>296)                  | 591<br>(540 to<br>646)                  | 1.2<br>(1.12 to<br>1.28)               | 2608.52<br>(2372.45 to<br>2865.32)         | 1961.97<br>(1791.19 to<br>2143.92)         | −0.93<br>(−1.1 to<br>−0.76)              |
| Angola  | Thalassemi<br>as            | 0<br>(0 to 0)                           | 0<br>(0 to 0)                           | 3.46<br>(2.86 to<br>4.3)               | 0.12<br>(0.07 to<br>0.17)                  | 0.18<br>(0.1 to<br>0.26)                   | 1.26<br>(1.03 to<br>1.49)                |
| Angola  | Thalassemi<br>as trait      | 4<br>(3 to 5)                           | 11<br>(9 to 13)                         | 1.74<br>(1.52 to<br>1.99)              | 39.6<br>(33.21 to<br>46.77)                | 37.18<br>(30.51 to<br>44.6)                | −0.28<br>(−0.45 to<br>−0.1)              |
| Angola  | Sickle<br>cell<br>disorders | 6<br>(5 to 8)                           | 14<br>(11 to 18)                        | 1.33<br>(1.03 to<br>1.66)              | 59.52<br>(46.53 to<br>78.1)                | 47.41<br>(38.04 to<br>60.65)               | −0.6<br>(−0.81 to<br>−0.39)              |
| Angola  | Sickle<br>cell trait        | 99<br>(89 to 111)                       | 220<br>(200 to<br>246)                  | 1.23<br>(1.1 to<br>1.37)               | 956.55<br>(857.78 to<br>1080.03)           | 731.37<br>(664.03 to<br>816.78)            | −0.82<br>(−1 to<br>−0.65)                |
| Angola  | G6PD<br>deficiency          | 59<br>(46 to 74)                        | 129<br>(99 to 159)                      | 1.16<br>(0.97 to<br>1.37)              | 576.42<br>(445.2 to<br>719.71)             | 426.64<br>(328.08 to<br>529.14)            | −1.04<br>(−1.21 to<br>−0.88)             |
| Angola  | G6PD trait                  | 101<br>(93 to 108)                      | 217<br>(199 to                          | 1.15<br>(1.09 to                       | 976.3<br>(899.35 to                        | 719.2<br>(661.94 to                        | −1.01<br>(−1.18 to                       |

| Regions             | Causes                | Cases in<br>1990<br>No.×103<br>(95% UI) | Cases in<br>2019<br>No.×103<br>(95% UI) | Change in<br>absolute<br>number<br>(%) | Rates in<br>1990 per<br>100000<br>(95% UI) | Rates in<br>2019 per<br>100000<br>(95% UI) | EAPC<br>from 1990<br>and 2019<br>(95%CI) |
|---------------------|-----------------------|-----------------------------------------|-----------------------------------------|----------------------------------------|--------------------------------------------|--------------------------------------------|------------------------------------------|
|                     |                       |                                         | 232)                                    | 1.22)                                  | 1043.82)                                   | 768.42)                                    | −0.85)                                   |
| Antigua and Barbuda | Inherited anemias     | 0<br>(0 to 0)                           | 0<br>(0 to 0)                           | −0.24<br>(−0.27 to −0.22)              | 557.97<br>(491.56 to 629.71)               | 289.11<br>(254.81 to 326.1)                | −2.61<br>(−2.74 to −2.49)                |
| Antigua and Barbuda | Thalassemias          | 0<br>(0 to 0)                           | 0<br>(0 to 0)                           | 0.2<br>(−0.26 to 1.5)                  | 0.01<br>(0.01 to 0.02)                     | 0.01<br>(0 to 0.01)                        | −1.14<br>(−1.44 to −0.84)                |
| Antigua and Barbuda | Thalassemias trait    | 0<br>(0 to 0)                           | 0<br>(0 to 0)                           | −0.13<br>(−0.26 to 0.13)               | 7.78<br>(5.89 to 9.93)                     | 4.64<br>(3.62 to 5.7)                      | −2.16<br>(−2.32 to −2)                   |
| Antigua and Barbuda | Sickle cell disorders | 0<br>(0 to 0)                           | 0<br>(0 to 0)                           | −0.15<br>(−0.24 to −0.05)              | 4.46<br>(3.26 to 6)                        | 2.6<br>(1.87 to 3.53)                      | −2.29<br>(−2.54 to −2.03)                |
| Antigua and Barbuda | Sickle cell trait     | 0<br>(0 to 0)                           | 0<br>(0 to 0)                           | −0.22<br>(−0.27 to −0.17)              | 162.74<br>(136.32 to 192.69)               | 87.34<br>(72.17 to 104.23)                 | −2.49<br>(−2.65 to −2.34)                |
| Antigua and Barbuda | G6PD deficiency       | 0<br>(0 to 0)                           | 0<br>(0 to 0)                           | −0.26<br>(−0.32 to −0.2)               | 173.97<br>(134.12 to 214.74)               | 87.83<br>(67.85 to 108.62)                 | −2.69<br>(−2.81 to −2.57)                |
| Antigua and Barbuda | G6PD trait            | 0<br>(0 to 0)                           | 0<br>(0 to 0)                           | −0.26<br>(−0.28 to −0.23)              | 209.01<br>(186.51 to 233.16)               | 106.68<br>(95.02 to 118.34)                | −2.67<br>(−2.8 to −2.54)                 |
| Argentina           | Inherited anemias     | 69<br>(60 to 78)                        | 66<br>(58 to 75)                        | −0.04<br>(−0.08 to 0.01)               | 207.12<br>(181.09 to 234.73)               | 146.26<br>(128.69 to 165.88)               | −0.94<br>(−1.15 to −0.73)                |
| Argentina           | Thalassemias          | 0<br>(0 to 0)                           | 0<br>(0 to 0)                           | −0.05<br>(−0.24 to 0.25)               | 0.27<br>(0.17 to 0.42)                     | 0.19<br>(0.13 to 0.27)                     | −1.01<br>(−1.28 to −0.74)                |
| Argentina           | Thalassemias trait    | 3<br>(2 to 3)                           | 5<br>(5 to 6)                           | 0.99<br>(0.69 to 1.37)                 | 8.21<br>(6.91 to 9.68)                     | 12<br>(10.11 to 13.96)                     | 1.95<br>(1.56 to 2.33)                   |
| Argentina           | Sickle cell disorders | 0<br>(0 to 0)                           | 0<br>(0 to 0)                           | 0.03<br>(0.03 to 0.03)                 | 0<br>(0 to 0.01)                           | 0<br>(0 to 0)                              | −0.71<br>(−0.85 to −0.57)                |
| Argentina           | Sickle cell trait     | 1<br>(1 to 2)                           | 1<br>(1 to 2)                           | 0.03<br>(0.03 to 0.03)                 | 3.91<br>(2.2 to 5.95)                      | 2.96<br>(1.69 to 4.49)                     | −0.71<br>(−0.85 to −0.56)                |
| Argentina           | G6PD deficiency       | 11<br>(8 to 13)                         | 10<br>(8 to 13)                         | −0.04<br>(−0.09 to 0.03)               | 32.55<br>(25 to 40.43)                     | 22.91<br>(17.7 to 29.14)                   | −1.04<br>(−1.24 to −0.83)                |
| Argentina           | G6PD trait            | 54<br>(48 to 60)                        | 49<br>(43 to 55)                        | −0.09<br>(−0.13 to −0.04)              | 162.18<br>(143.79 to 181.56)               | 108.21<br>(95.73 to 121.64)                | −1.13<br>(−1.37 to −0.9)                 |

| <b>Regions</b> | <b>Causes</b>               | <b>Cases in<br/>1990<br/>No.×103<br/>(95% UI)</b> | <b>Cases in<br/>2019<br/>No.×103<br/>(95% UI)</b> | <b>Change in<br/>absolute<br/>number<br/>(%)</b> | <b>Rates in<br/>1990 per<br/>100000<br/>(95% UI)</b> | <b>Rates in<br/>2019 per<br/>100000<br/>(95% UI)</b> | <b>EAPC<br/>from 1990<br/>and 2019<br/>(95%CI)</b> |
|----------------|-----------------------------|---------------------------------------------------|---------------------------------------------------|--------------------------------------------------|------------------------------------------------------|------------------------------------------------------|----------------------------------------------------|
| Armenia        | Inherited<br>anemias        | 11<br>(10 to 13)                                  | 5<br>(5 to 6)                                     | -0.52<br>(-0.53 to<br>-0.51)                     | 330.66<br>(295.8 to<br>368.12)                       | 178.23<br>(159.35 to<br>198.49)                      | -1.01<br>(-1.55 to<br>-0.47)                       |
| Armenia        | Thalassemi<br>as            | 0<br>(0 to 0)                                     | 0<br>(0 to 0)                                     | -0.61<br>(-0.66 to<br>-0.56)                     | 2.15<br>(1.52 to<br>3.01)                            | 0.94<br>(0.67 to<br>1.31)                            | -1.76<br>(-2.27 to<br>-1.25)                       |
| Armenia        | Thalassemi<br>as trait      | 4<br>(3 to 4)                                     | 2<br>(1 to 2)                                     | -0.51<br>(-0.54 to<br>-0.48)                     | 105.14<br>(86.55 to<br>130.86)                       | 58.08<br>(48.06 to<br>70.81)                         | -0.99<br>(-1.49 to<br>-0.48)                       |
| Armenia        | Sickle<br>cell<br>disorders | 0<br>(0 to 0)                                     | 0<br>(0 to 0)                                     | -0.52<br>(-0.62 to<br>-0.4)                      | 0.01<br>(0.01 to<br>0.02)                            | 0.01<br>(0 to 0.01)                                  | -0.97<br>(-1.49 to<br>-0.44)                       |
| Armenia        | Sickle<br>cell trait        | 0<br>(0 to 0)                                     | 0<br>(0 to 0)                                     | -0.52<br>(-0.57 to<br>-0.45)                     | 10.46<br>(8.3 to<br>13.07)                           | 5.72<br>(4.51 to<br>7.16)                            | -0.98<br>(-1.5 to<br>-0.45)                        |
| Armenia        | G6PD<br>deficiency          | 1<br>(1 to 1)                                     | 1<br>(0 to 1)                                     | -0.5<br>(-0.54 to<br>-0.46)                      | 32.46<br>(24.99 to<br>41.15)                         | 18.23<br>(14.14 to<br>23.18)                         | -0.83<br>(-1.36 to<br>-0.3)                        |
| Armenia        | G6PD trait                  | 6<br>(5 to 7)                                     | 3<br>(3 to 3)                                     | -0.53<br>(-0.53 to<br>-0.53)                     | 180.42<br>(160.53 to<br>202.04)                      | 95.25<br>(84.75 to<br>106.66)                        | -1.06<br>(-1.62 to<br>-0.5)                        |
| Australia      | Inherited<br>anemias        | 18<br>(16 to 20)                                  | 17<br>(15 to 20)                                  | -0.01<br>(-0.08 to<br>0.04)                      | 104.74<br>(92.97 to<br>117.38)                       | 70.99<br>(61.29 to<br>81.19)                         | -1.17<br>(-1.45 to<br>-0.89)                       |
| Australia      | Thalassemi<br>as            | 0<br>(0 to 0)                                     | 0<br>(0 to 0)                                     | 0.14<br>(-0.01 to<br>0.31)                       | 0.75<br>(0.49 to<br>1.18)                            | 0.59<br>(0.39 to<br>0.9)                             | -0.69<br>(-0.85 to<br>-0.53)                       |
| Australia      | Thalassemi<br>as trait      | 3<br>(2 to 3)                                     | 3<br>(3 to 4)                                     | 0.26<br>(0.17 to<br>0.38)                        | 15.27<br>(13.41 to<br>17.41)                         | 13.24<br>(11.69 to<br>14.92)                         | -0.44<br>(-0.55 to<br>-0.32)                       |
| Australia      | Sickle<br>cell<br>disorders | 0<br>(0 to 0)                                     | 0<br>(0 to 0)                                     | 0.27<br>(0.12 to<br>0.6)                         | 0.02<br>(0.01 to<br>0.02)                            | 0.01<br>(0.01 to<br>0.02)                            | -0.3<br>(-0.46 to<br>-0.15)                        |
| Australia      | Sickle<br>cell trait        | 2<br>(1 to 2)                                     | 2<br>(2 to 2)                                     | 0.24<br>(0.16 to<br>0.41)                        | 9.28<br>(7.8 to<br>11.03)                            | 7.92<br>(6.65 to<br>9.39)                            | -0.34<br>(-0.51 to<br>-0.17)                       |
| Australia      | G6PD<br>deficiency          | 1<br>(1 to 1)                                     | 3<br>(2 to 4)                                     | 1.64<br>(1.38 to<br>1.99)                        | 6.8<br>(5.16 to<br>8.67)                             | 12.3<br>(9.47 to<br>15.32)                           | 2.38<br>(1.52 to<br>3.24)                          |
| Australia      | G6PD trait                  | 12<br>(11 to 14)                                  | 9<br>(7 to 11)                                    | -0.26<br>(-0.35 to<br>-0.2)                      | 72.63<br>(63.28 to<br>82.94)                         | 36.94<br>(30.12 to<br>43.6)                          | -2.11<br>(-2.65 to<br>-1.57)                       |
| Austria        | Inherited                   | 16                                                | 16                                                | -0.04                                            | 207.21                                               | 174.06                                               | -0.71                                              |



| Regions           | Causes                       | Cases in 1990<br>No.×103<br>(95% UI) | Cases in 2019<br>No.×103<br>(95% UI) | Change in absolute number<br>(%) | Rates in 1990 per 100000<br>(95% UI) | Rates in 2019 per 100000<br>(95% UI) | EAPC from 1990 and 2019<br>(95%CI) |
|-------------------|------------------------------|--------------------------------------|--------------------------------------|----------------------------------|--------------------------------------|--------------------------------------|------------------------------------|
|                   | <b>anemias</b>               | (14 to 18)                           | (14 to 17)                           | (−0.07 to 0)                     | (185.61 to 230.27)                   | (156.23 to 193.79)                   | (−0.96 to −0.46)                   |
| <b>Austria</b>    | Thalassemi<br>as             | 0<br>(0 to 0)                        | 0<br>(0 to 0)                        | −0.13<br>(−0.25 to 0.01)         | 0.16<br>(0.11 to 0.21)               | 0.12<br>(0.08 to 0.17)               | −1.94<br>(−2.65 to −1.22)          |
| <b>Austria</b>    | Thalassemi<br>as trait       | 2<br>(1 to 2)                        | 1<br>(1 to 2)                        | −0.05<br>(−0.11 to 0.01)         | 19.44<br>(16.82 to 22.27)            | 16.09<br>(13.96 to 18.46)            | −1<br>(−1.24 to −0.75)             |
| <b>Austria</b>    | Sickle<br>cell disorders     | 0<br>(0 to 0)                        | 0<br>(0 to 0)                        | 0.76<br>(0.56 to 1)              | 0.07<br>(0.05 to 0.08)               | 0.1<br>(0.08 to 0.13)                | 1.99<br>(1.6 to 2.39)              |
| <b>Austria</b>    | Sickle<br>cell trait         | 1<br>(1 to 1)                        | 2<br>(1 to 2)                        | 0.32<br>(0.24 to 0.41)           | 16.25<br>(14.31 to 18.51)            | 18.72<br>(16.59 to 21.1)             | 0.74<br>(0.45 to 1.03)             |
| <b>Austria</b>    | G6PD<br>deficiency           | 3<br>(2 to 3)                        | 3<br>(2 to 3)                        | −0.02<br>(−0.07 to 0.03)         | 33.33<br>(25.68 to 41.52)            | 28.53<br>(21.87 to 36.04)            | −0.67<br>(−0.97 to −0.38)          |
| <b>Austria</b>    | G6PD trait                   | 11<br>(10 to 12)                     | 10<br>(9 to 11)                      | −0.08<br>(−0.12 to −0.04)        | 137.97<br>(123.66 to 152.8)          | 110.49<br>(98.81 to 122.12)          | −0.87<br>(−1.11 to −0.62)          |
| <b>Azerbaijan</b> | <b>Inherited<br/>anemias</b> | 31<br>(28 to 34)                     | 23<br>(21 to 25)                     | −0.25<br>(−0.27 to −0.24)        | 420.15<br>(380.93 to 460.11)         | 223.74<br>(202.92 to 245.65)         | −1.21<br>(−1.62 to −0.8)           |
| <b>Azerbaijan</b> | Thalassemi<br>as             | 0<br>(0 to 0)                        | 0<br>(0 to 0)                        | −0.38<br>(−0.44 to −0.32)        | 3.56<br>(2.7 to 4.68)                | 1.56<br>(1.21 to 2.01)               | −1.88<br>(−2.28 to −1.48)          |
| <b>Azerbaijan</b> | Thalassemi<br>as trait       | 11<br>(10 to 13)                     | 8<br>(7 to 10)                       | −0.23<br>(−0.27 to −0.19)        | 150.16<br>(130.64 to 170.8)          | 82.58<br>(72.24 to 93.3)             | −1.14<br>(−1.53 to −0.74)          |
| <b>Azerbaijan</b> | Sickle<br>cell disorders     | 0<br>(0 to 0)                        | 0<br>(0 to 0)                        | −0.26<br>(−0.38 to −0.11)        | 0.02<br>(0.01 to 0.03)               | 0.01<br>(0.01 to 0.01)               | −1.24<br>(−1.64 to −0.83)          |
| <b>Azerbaijan</b> | Sickle<br>cell trait         | 1<br>(1 to 1)                        | 1<br>(1 to 1)                        | −0.25<br>(−0.32 to −0.17)        | 13.22<br>(10.3 to 16.54)             | 7.04<br>(5.51 to 8.89)               | −1.21<br>(−1.61 to −0.81)          |
| <b>Azerbaijan</b> | G6PD<br>deficiency           | 3<br>(2 to 4)                        | 2<br>(2 to 3)                        | −0.22<br>(−0.27 to −0.15)        | 38.52<br>(29.64 to 48.01)            | 21.48<br>(16.65 to 27.16)            | −0.99<br>(−1.4 to −0.58)           |
| <b>Azerbaijan</b> | G6PD trait                   | 16<br>(14 to 18)                     | 11<br>(10 to 13)                     | −0.27<br>(−0.27 to −0.27)        | 214.67<br>(191.53 to 238.73)         | 111.07<br>(99.09 to 123.52)          | −1.3<br>(−1.72 to −0.88)           |
| <b>Bahamas</b>    | <b>Inherited<br/>anemias</b> | 1<br>(1 to 2)                        | 1<br>(1 to 1)                        | −0.17<br>(−0.2 to                | 549.95<br>(486.36 to                 | 308.94<br>(271.94 to                 | −2.66<br>(−2.89 to                 |

| <b>Regions</b>    | <b>Causes</b>                | <b>Cases in<br/>1990<br/>No.×103<br/>(95% UI)</b> | <b>Cases in<br/>2019<br/>No.×103<br/>(95% UI)</b> | <b>Change in<br/>absolute<br/>number<br/>(%)</b> | <b>Rates in<br/>1990 per<br/>100000<br/>(95% UI)</b> | <b>Rates in<br/>2019 per<br/>100000<br/>(95% UI)</b> | <b>EAPC<br/>from 1990<br/>and 2019<br/>(95%CI)</b> |
|-------------------|------------------------------|---------------------------------------------------|---------------------------------------------------|--------------------------------------------------|------------------------------------------------------|------------------------------------------------------|----------------------------------------------------|
|                   |                              |                                                   |                                                   | -0.14)                                           | 619.12)                                              | 348.52)                                              | -2.42)                                             |
| <b>Bahamas</b>    | Thalassemi<br>as             | 0<br>(0 to 0)                                     | 0<br>(0 to 0)                                     | 0.28<br>(-0.23 to<br>1.57)                       | 0.01<br>(0.01 to<br>0.02)                            | 0.01<br>(0 to 0.01)                                  | -1.19<br>(-1.48 to<br>-0.89)                       |
| <b>Bahamas</b>    | Thalassemi<br>as trait       | 0<br>(0 to 0)                                     | 0<br>(0 to 0)                                     | -0.08<br>(-0.23 to<br>0.18)                      | 7.37<br>(5.64 to<br>9.32)                            | 4.62<br>(3.59 to<br>5.62)                            | -2.23<br>(-2.43 to<br>-2.04)                       |
| <b>Bahamas</b>    | Sickle<br>cell<br>disorders  | 0<br>(0 to 0)                                     | 0<br>(0 to 0)                                     | 0.05<br>(-0.05 to<br>0.18)                       | 7.23<br>(5.36 to<br>9.36)                            | 5.18<br>(3.77 to<br>6.65)                            | -2.19<br>(-2.77 to<br>-1.59)                       |
| <b>Bahamas</b>    | Sickle<br>cell trait         | 0<br>(0 to 1)                                     | 0<br>(0 to 1)                                     | -0.09<br>(-0.14 to<br>-0.04)                     | 187.1<br>(159.25 to<br>216.37)                       | 115.25<br>(97.98 to<br>133.97)                       | -2.5<br>(-2.88 to<br>-2.11)                        |
| <b>Bahamas</b>    | G6PD<br>deficiency           | 0<br>(0 to 1)                                     | 0<br>(0 to 0)                                     | -0.23<br>(-0.28 to<br>-0.16)                     | 156.46<br>(120.84 to<br>196.87)                      | 81.82<br>(62.79 to<br>102.5)                         | -2.81<br>(-3 to<br>-2.61)                          |
| <b>Bahamas</b>    | G6PD trait                   | 0<br>(0 to 1)                                     | 0<br>(0 to 0)                                     | -0.22<br>(-0.25 to<br>-0.2)                      | 191.77<br>(170.95 to<br>214.18)                      | 102.06<br>(90.8 to<br>113.89)                        | -2.75<br>(-2.94 to<br>-2.55)                       |
| <b>Bahrain</b>    | <b>Inherited<br/>anemias</b> | 9<br>(8 to 10)                                    | 8<br>(7 to 9)                                     | -0.09<br>(-0.13 to<br>-0.06)                     | 1751.44<br>(1612.79 to<br>1892.7)                    | 559.89<br>(511.7 to<br>613.55)                       | -4.3<br>(-4.79 to<br>-3.81)                        |
| <b>Bahrain</b>    | Thalassemi<br>as             | 0<br>(0 to 0)                                     | 0<br>(0 to 0)                                     | -0.01<br>(-0.12 to<br>0.1)                       | 1.92<br>(1.34 to<br>2.75)                            | 0.67<br>(0.46 to<br>0.95)                            | -3.7<br>(-3.8 to<br>-3.6)                          |
| <b>Bahrain</b>    | Thalassemi<br>as trait       | 1<br>(1 to 1)                                     | 1<br>(1 to 1)                                     | -0.02<br>(-0.07 to<br>0.03)                      | 150.2<br>(127.19 to<br>177.26)                       | 52.05<br>(43.96 to<br>61.77)                         | -3.71<br>(-3.81 to<br>-3.6)                        |
| <b>Bahrain</b>    | Sickle<br>cell<br>disorders  | 0<br>(0 to 0)                                     | 0<br>(0 to 0)                                     | -0.2<br>(-0.28 to<br>-0.12)                      | 30.36<br>(24.65 to<br>37.56)                         | 8.58<br>(6.84 to<br>10.85)                           | -5.15<br>(-5.54 to<br>-4.77)                       |
| <b>Bahrain</b>    | Sickle<br>cell trait         | 3<br>(2 to 3)                                     | 2<br>(2 to 3)                                     | -0.12<br>(-0.16 to<br>-0.08)                     | 512.6<br>(467.9 to<br>563.44)                        | 158.3<br>(143.23 to<br>176.05)                       | -4.42<br>(-4.6 to<br>-4.24)                        |
| <b>Bahrain</b>    | G6PD<br>deficiency           | 2<br>(2 to 3)                                     | 2<br>(2 to 3)                                     | -0.12<br>(-0.22 to<br>-0.03)                     | 454.78<br>(360.81 to<br>552.72)                      | 140.73<br>(108.75 to<br>176.82)                      | -4.71<br>(-5.94 to<br>-3.46)                       |
| <b>Bahrain</b>    | G6PD trait                   | 3<br>(3 to 3)                                     | 3<br>(3 to 3)                                     | -0.06<br>(-0.08 to<br>-0.03)                     | 601.57<br>(565.91 to<br>630.99)                      | 199.57<br>(187.41 to<br>209.32)                      | -3.93<br>(-4.2 to<br>-3.66)                        |
| <b>Bangladesh</b> | <b>Inherited<br/>anemias</b> | 1342<br>(1200 to<br>1501)                         | 979<br>(878 to<br>1087)                           | -0.27<br>(-0.29 to<br>-0.25)                     | 1230.71<br>(1100.11 to<br>1376.68)                   | 614.81<br>(551.38 to<br>682.46)                      | -2.34<br>(-2.37 to<br>-2.32)                       |

| <b>Regions</b> | <b>Causes</b>                | <b>Cases in<br/>1990<br/>No.×103<br/>(95% UI)</b> | <b>Cases in<br/>2019<br/>No.×103<br/>(95% UI)</b> | <b>Change in<br/>absolute<br/>number<br/>(%)</b> | <b>Rates in<br/>1990 per<br/>100000<br/>(95% UI)</b> | <b>Rates in<br/>2019 per<br/>100000<br/>(95% UI)</b> | <b>EAPC<br/>from 1990<br/>and 2019<br/>(95%CI)</b> |
|----------------|------------------------------|---------------------------------------------------|---------------------------------------------------|--------------------------------------------------|------------------------------------------------------|------------------------------------------------------|----------------------------------------------------|
| Bangladesh     | Thalassemi<br>as             | 7<br>(6 to 9)                                     | 8<br>(7 to 11)                                    | 0.15<br>(0.06 to<br>0.24)                        | 6.73<br>(5.49 to<br>8.55)                            | 5.31<br>(4.26 to<br>6.69)                            | -0.78<br>(-0.82 to<br>-0.75)                       |
| Bangladesh     | Thalassemi<br>as trait       | 277<br>(253 to<br>304)                            | 227<br>(208 to<br>246)                            | -0.18<br>(-0.21 to<br>-0.16)                     | 253.94<br>(232.42 to<br>278.51)                      | 142.24<br>(130.52 to<br>154.54)                      | -1.98<br>(-2.01 to<br>-1.95)                       |
| Bangladesh     | Sickle<br>cell<br>disorders  | 0<br>(0 to 0)                                     | 0<br>(0 to 0)                                     | -0.32<br>(-0.43 to<br>-0.23)                     | 0.06<br>(0.04 to<br>0.09)                            | 0.03<br>(0.02 to<br>0.04)                            | -2.69<br>(-2.76 to<br>-2.62)                       |
| Bangladesh     | Sickle<br>cell trait         | 29<br>(24 to 36)                                  | 20<br>(16 to 25)                                  | -0.31<br>(-0.38 to<br>-0.27)                     | 26.73<br>(21.59 to<br>33.43)                         | 12.6<br>(10.11 to<br>15.82)                          | -2.61<br>(-2.66 to<br>-2.56)                       |
| Bangladesh     | G6PD<br>deficiency           | 387<br>(300 to<br>485)                            | 268<br>(209 to<br>332)                            | -0.31<br>(-0.35 to<br>-0.25)                     | 354.84<br>(274.98 to<br>445.02)                      | 168.05<br>(131.15 to<br>208.49)                      | -2.48<br>(-2.51 to<br>-2.46)                       |
| Bangladesh     | G6PD trait                   | 642<br>(585 to<br>695)                            | 456<br>(417 to<br>492)                            | -0.29<br>(-0.3 to<br>-0.28)                      | 588.4<br>(536.42 to<br>637.02)                       | 286.58<br>(262.08 to<br>309.16)                      | -2.44<br>(-2.46 to<br>-2.42)                       |
| Barbados       | <b>Inherited<br/>anemias</b> | 1<br>(1 to 1)                                     | 1<br>(1 to 1)                                     | -0.3<br>(-0.33 to<br>-0.28)                      | 423.36<br>(374.89 to<br>479.25)                      | 251.51<br>(222.79 to<br>285.5)                       | -1.83<br>(-1.97 to<br>-1.69)                       |
| Barbados       | Thalassemi<br>as             | 0<br>(0 to 0)                                     | 0<br>(0 to 0)                                     | 0.11<br>(-0.32 to<br>1.25)                       | 0.01<br>(0 to 0.01)                                  | 0.01<br>(0 to 0.01)                                  | -0.36<br>(-0.76 to<br>0.04)                        |
| Barbados       | Thalassemi<br>as trait       | 0<br>(0 to 0)                                     | 0<br>(0 to 0)                                     | -0.2<br>(-0.32 to<br>0.03)                       | 5.75<br>(4.38 to<br>7.33)                            | 3.93<br>(3.07 to<br>4.85)                            | -1.38<br>(-1.61 to<br>-1.14)                       |
| Barbados       | Sickle<br>cell<br>disorders  | 0<br>(0 to 0)                                     | 0<br>(0 to 0)                                     | -0.2<br>(-0.29 to<br>-0.09)                      | 3.67<br>(2.7 to<br>4.84)                             | 2.5<br>(1.77 to<br>3.31)                             | -1.49<br>(-1.65 to<br>-1.33)                       |
| Barbados       | Sickle<br>cell trait         | 0<br>(0 to 0)                                     | 0<br>(0 to 0)                                     | -0.27<br>(-0.32 to<br>-0.22)                     | 125.34<br>(105.26 to<br>146.52)                      | 77.69<br>(64.86 to<br>92.1)                          | -1.71<br>(-1.82 to<br>-1.61)                       |
| Barbados       | G6PD<br>deficiency           | 0<br>(0 to 0)                                     | 0<br>(0 to 0)                                     | -0.32<br>(-0.37 to<br>-0.27)                     | 132.11<br>(102 to<br>163.94)                         | 76.41<br>(58.89 to<br>94.81)                         | -1.9<br>(-2.07 to<br>-1.73)                        |
| Barbados       | G6PD trait                   | 0<br>(0 to 0)                                     | 0<br>(0 to 0)                                     | -0.32<br>(-0.35 to<br>-0.29)                     | 156.48<br>(139.25 to<br>174.57)                      | 90.97<br>(81.13 to<br>100.06)                        | -1.89<br>(-2.05 to<br>-1.73)                       |
| Belarus        | <b>Inherited<br/>anemias</b> | 17<br>(15 to 19)                                  | 13<br>(12 to 15)                                  | -0.25<br>(-0.26 to<br>-0.23)                     | 166.42<br>(147.84 to<br>186.05)                      | 137.95<br>(122.47 to<br>154.84)                      | 0.54<br>(0.01 to<br>1.06)                          |
| Belarus        | Thalassemi                   | 0                                                 | 0                                                 | -0.49                                            | 0.71                                                 | 0.4                                                  | -0.76                                              |

| Regions | Causes                   | Cases in 1990<br>No.×103<br>(95% UI) | Cases in 2019<br>No.×103<br>(95% UI) | Change in absolute number<br>(%) | Rates in 1990 per 100000<br>(95% UI) | Rates in 2019 per 100000<br>(95% UI) | EAPC from 1990 and 2019<br>(95%CI) |
|---------|--------------------------|--------------------------------------|--------------------------------------|----------------------------------|--------------------------------------|--------------------------------------|------------------------------------|
|         | as                       | (0 to 0)                             | (0 to 0)                             | (−0.55 to −0.42)                 | (0.5 to 1.05)                        | (0.29 to 0.56)                       | (−1.3 to −0.22)                    |
| Belarus | Thalassemi<br>as trait   | 3<br>(3 to 4)                        | 3<br>(2 to 3)                        | −0.24<br>(−0.28 to −0.18)        | 32.88<br>(27.16 to 40.03)            | 27.72<br>(23 to 33.81)               | 0.59<br>(0.06 to 1.13)             |
| Belarus | Sickle<br>cell disorders | 0<br>(0 to 0)                        | 0<br>(0 to 0)                        | −0.23<br>(−0.38 to −0.07)        | 0.01<br>(0.01 to 0.01)               | 0.01<br>(0 to 0.01)                  | 0.62<br>(0.13 to 1.12)             |
| Belarus | Sickle<br>cell trait     | 1<br>(1 to 1)                        | 0<br>(0 to 1)                        | −0.24<br>(−0.33 to −0.17)        | 6.28<br>(5.03 to 7.72)               | 5.24<br>(4.22 to 6.45)               | 0.59<br>(0.08 to 1.1)              |
| Belarus | G6PD<br>deficiency       | 3<br>(2 to 3)                        | 2<br>(2 to 3)                        | −0.21<br>(−0.23 to −0.19)        | 26.14<br>(20.2 to 33.16)             | 22.8<br>(17.61 to 28.41)             | 0.41<br>(−0.09 to 0.91)            |
| Belarus | G6PD trait               | 11<br>(9 to 12)                      | 8<br>(7 to 9)                        | −0.26<br>(−0.26 to −0.26)        | 100.4<br>(89.17 to 112.22)           | 81.79<br>(72.64 to 91.42)            | 0.55<br>(0.02 to 1.09)             |
| Belgium | Inherited<br>anemias     | 23<br>(21 to 26)                     | 21<br>(19 to 23)                     | −0.11<br>(−0.14 to −0.08)        | 235.05<br>(211.85 to 259.22)         | 182.56<br>(162.58 to 203.15)         | −0.51<br>(−0.66 to −0.35)          |
| Belgium | Thalassemi<br>as         | 0<br>(0 to 0)                        | 0<br>(0 to 0)                        | −0.2<br>(−0.3 to −0.1)           | 0.2<br>(0.14 to 0.27)                | 0.14<br>(0.09 to 0.2)                | −1.75<br>(−2.41 to −1.08)          |
| Belgium | Thalassemi<br>as trait   | 1<br>(1 to 2)                        | 1<br>(1 to 2)                        | −0.08<br>(−0.18 to 0.02)         | 14.11<br>(11.96 to 16.26)            | 11.39<br>(9.57 to 13.42)             | −0.71<br>(−0.96 to −0.45)          |
| Belgium | Sickle<br>cell disorders | 0<br>(0 to 0)                        | 0<br>(0 to 0)                        | −0.64<br>(−0.7 to −0.58)         | 0.4<br>(0.3 to 0.53)                 | 0.13<br>(0.09 to 0.17)               | −1.65<br>(−2.23 to −1.07)          |
| Belgium | Sickle<br>cell trait     | 4<br>(3 to 5)                        | 2<br>(2 to 3)                        | −0.43<br>(−0.49 to −0.37)        | 40.93<br>(34.76 to 47.89)            | 20.5<br>(16.76 to 24.52)             | −1.05<br>(−1.41 to −0.69)          |
| Belgium | G6PD<br>deficiency       | 3<br>(3 to 4)                        | 3<br>(3 to 4)                        | 0.01<br>(−0.06 to 0.05)          | 34.7<br>(26.68 to 43.34)             | 30.51<br>(23.66 to 37.91)            | −0.25<br>(−0.38 to −0.11)          |
| Belgium | G6PD trait               | 14<br>(13 to 16)                     | 14<br>(12 to 15)                     | −0.05<br>(−0.09 to −0.01)        | 144.71<br>(129.78 to 158.76)         | 119.89<br>(107.32 to 131.64)         | −0.42<br>(−0.57 to −0.26)          |
| Belize  | Inherited<br>anemias     | 2<br>(1 to 2)                        | 2<br>(2 to 2)                        | 0.32<br>(0.28 to 0.36)           | 877.93<br>(775.17 to 994.28)         | 525.08<br>(464.06 to 592.68)         | −1.8<br>(−1.87 to −1.72)           |
| Belize  | Thalassemi<br>as         | 0<br>(0 to 0)                        | 0<br>(0 to 0)                        | 1.1<br>(0.28 to                  | 0.02<br>(0.01 to                     | 0.02<br>(0.01 to                     | −0.22<br>(−0.52 to                 |

| Regions | Causes                      | Cases in<br>1990<br>No.×103<br>(95% UI) | Cases in<br>2019<br>No.×103<br>(95% UI) | Change in<br>absolute<br>number<br>(%) | Rates in<br>1990 per<br>100000<br>(95% UI) | Rates in<br>2019 per<br>100000<br>(95% UI) | EAPC<br>from 1990<br>and 2019<br>(95%CI) |
|---------|-----------------------------|-----------------------------------------|-----------------------------------------|----------------------------------------|--------------------------------------------|--------------------------------------------|------------------------------------------|
|         |                             |                                         |                                         | 3. 1)                                  | 0. 03)                                     | 0. 02)                                     | 0. 09)                                   |
| Belize  | Thalassemi<br>as trait      | 0<br>(0 to 0)                           | 0<br>(0 to 0)                           | 0. 51<br>(0. 29 to<br>0. 91)           | 11. 98<br>(9. 27 to<br>15. 06)             | 8. 23<br>(6. 38 to<br>9. 92)               | -1. 32<br>(-1. 46 to<br>-1. 17)          |
| Belize  | Sickle<br>cell<br>disorders | 0<br>(0 to 0)                           | 0<br>(0 to 0)                           | 0. 48<br>(0. 32 to<br>0. 65)           | 12. 9<br>(9. 29 to<br>17. 29)              | 8. 64<br>(6. 16 to<br>11. 54)              | -1. 51<br>(-1. 72 to<br>-1. 3)           |
| Belize  | Sickle<br>cell trait        | 1<br>(0 to 1)                           | 1<br>(1 to 1)                           | 0. 36<br>(0. 28 to<br>0. 43)           | 304. 32<br>(255. 63 to<br>360. 23)         | 187. 16<br>(155. 23 to<br>222)             | -1. 71<br>(-1. 83 to<br>-1. 6)           |
| Belize  | G6PD<br>deficiency          | 0<br>(0 to 1)                           | 1<br>(0 to 1)                           | 0. 28<br>(0. 24 to<br>0. 3)            | 249. 41<br>(191. 91 to<br>312. 55)         | 145. 23<br>(111. 48 to<br>182. 28)         | -1. 86<br>(-1. 95 to<br>-1. 78)          |
| Belize  | G6PD trait                  | 1<br>(0 to 1)                           | 1<br>(1 to 1)                           | 0. 3<br>(0. 25 to<br>0. 35)            | 299. 31<br>(266. 36 to<br>334. 43)         | 175. 81<br>(156. 61 to<br>195. 83)         | -1. 86<br>(-1. 94 to<br>-1. 78)          |
| Benin   | Inherited<br>anemias        | 117<br>(107 to<br>127)                  | 230<br>(210 to<br>251)                  | 0. 97<br>(0. 89 to<br>1. 04)           | 2408. 92<br>(2207. 43 to<br>2607. 35)      | 1816. 53<br>(1657. 21 to<br>1983. 97)      | -0. 94<br>(-1. 05 to<br>-0. 83)          |
| Benin   | Thalassemi<br>as            | 0<br>(0 to 0)                           | 0<br>(0 to 0)                           | 1. 77<br>(1. 36 to<br>2. 28)           | 0. 38<br>(0. 26 to<br>0. 57)               | 0. 41<br>(0. 28 to<br>0. 56)               | 0. 33<br>(0. 25 to<br>0. 4)              |
| Benin   | Thalassemi<br>as trait      | 5<br>(4 to 6)                           | 11<br>(9 to 13)                         | 1. 37<br>(1. 23 to<br>1. 52)           | 94. 58<br>(78. 33 to<br>115. 6)            | 85. 87<br>(71. 78 to<br>101. 94)           | -0. 22<br>(-0. 29 to<br>-0. 15)          |
| Benin   | Sickle<br>cell<br>disorders | 8<br>(7 to 10)                          | 12<br>(10 to 15)                        | 0. 47<br>(0. 32 to<br>0. 62)           | 169. 46<br>(142. 11 to<br>201. 32)         | 95. 64<br>(76. 88 to<br>115. 74)           | -2. 29<br>(-2. 63 to<br>-1. 95)          |
| Benin   | Sickle<br>cell trait        | 51<br>(46 to 56)                        | 91<br>(80 to 104)                       | 0. 81<br>(0. 67 to<br>0. 94)           | 1043. 27<br>(943. 22 to<br>1156. 97)       | 722. 36<br>(634. 24 to<br>817. 69)         | -1. 29<br>(-1. 46 to<br>-1. 11)          |
| Benin   | G6PD<br>deficiency          | 16<br>(12 to 20)                        | 35<br>(27 to 44)                        | 1. 2<br>(1. 04 to<br>1. 35)            | 330. 22<br>(254. 3 to<br>417. 92)          | 278. 4<br>(215. 58 to<br>346. 03)          | -0. 43<br>(-0. 47 to<br>-0. 39)          |
| Benin   | G6PD trait                  | 37<br>(34 to 41)                        | 80<br>(73 to 87)                        | 1. 15<br>(1. 07 to<br>1. 19)           | 771. 01<br>(697. 99 to<br>836. 18)         | 633. 86<br>(575. 28 to<br>686. 66)         | -0. 56<br>(-0. 63 to<br>-0. 5)           |
| Bermuda | Inherited<br>anemias        | 0<br>(0 to 0)                           | 0<br>(0 to 0)                           | -0. 41<br>(-0. 43 to<br>-0. 4)         | 353. 29<br>(310. 06 to<br>400. 11)         | 192. 19<br>(169. 68 to<br>217. 93)         | -2. 08<br>(-2. 27 to<br>-1. 89)          |
| Bermuda | Thalassemi<br>as            | 0<br>(0 to 0)                           | 0<br>(0 to 0)                           | -0. 06<br>(-0. 43 to<br>0. 92)         | 0. 01<br>(0 to 0. 01)                      | 0. 01<br>(0 to 0. 01)                      | -0. 59<br>(-1 to<br>-0. 17)              |

| <b>Regions</b>                                       | <b>Causes</b>                | <b>Cases in<br/>1990<br/>No.×103<br/>(95% UI)</b> | <b>Cases in<br/>2019<br/>No.×103<br/>(95% UI)</b> | <b>Change in<br/>absolute<br/>number<br/>(%)</b> | <b>Rates in<br/>1990 per<br/>100000<br/>(95% UI)</b> | <b>Rates in<br/>2019 per<br/>100000<br/>(95% UI)</b> | <b>EAPC<br/>from 1990<br/>and 2019<br/>(95%CI)</b> |
|------------------------------------------------------|------------------------------|---------------------------------------------------|---------------------------------------------------|--------------------------------------------------|------------------------------------------------------|------------------------------------------------------|----------------------------------------------------|
| <b>Bermuda</b>                                       | Thalassemi<br>as trait       | 0<br>(0 to 0)                                     | 0<br>(0 to 0)                                     | -0.32<br>(-0.43 to<br>-0.13)                     | 4.89<br>(3.83 to<br>6.1)                             | 3.08<br>(2.45 to<br>3.73)                            | -1.62<br>(-1.9 to<br>-1.34)                        |
| <b>Bermuda</b>                                       | Sickle<br>cell<br>disorders  | 0<br>(0 to 0)                                     | 0<br>(0 to 0)                                     | -0.35<br>(-0.42 to<br>-0.27)                     | 2.05<br>(1.5 to<br>2.76)                             | 1.23<br>(0.88 to<br>1.66)                            | -1.81<br>(-1.94 to<br>-1.69)                       |
| <b>Bermuda</b>                                       | Sickle<br>cell trait         | 0<br>(0 to 0)                                     | 0<br>(0 to 0)                                     | -0.39<br>(-0.43 to<br>-0.36)                     | 98.19<br>(82.41 to<br>115.4)                         | 55.29<br>(46.12 to<br>65.03)                         | -1.99<br>(-2.14 to<br>-1.84)                       |
| <b>Bermuda</b>                                       | G6PD<br>deficiency           | 0<br>(0 to 0)                                     | 0<br>(0 to 0)                                     | -0.43<br>(-0.43 to<br>-0.43)                     | 110.41<br>(85.44 to<br>137.98)                       | 58.55<br>(45.39 to<br>73.16)                         | -2.15<br>(-2.37 to<br>-1.93)                       |
| <b>Bermuda</b>                                       | G6PD trait                   | 0<br>(0 to 0)                                     | 0<br>(0 to 0)                                     | -0.42<br>(-0.42 to<br>-0.42)                     | 137.74<br>(122.56 to<br>153.63)                      | 74.03<br>(65.89 to<br>82.58)                         | -2.11<br>(-2.32 to<br>-1.91)                       |
| <b>Bhutan</b>                                        | <b>Inherited<br/>anemias</b> | 5<br>(4 to 5)                                     | 3<br>(3 to 3)                                     | -0.37<br>(-0.38 to<br>-0.36)                     | 807.07<br>(718.88 to<br>896.99)                      | 412.5<br>(365.79 to<br>459.79)                       | -2.22<br>(-2.26 to<br>-2.18)                       |
| <b>Bhutan</b>                                        | Thalassemi<br>as             | 0<br>(0 to 0)                                     | 0<br>(0 to 0)                                     | -0.31<br>(-0.38 to<br>-0.25)                     | 1.61<br>(1.16 to<br>2.16)                            | 0.9<br>(0.62 to<br>1.23)                             | -1.89<br>(-1.92 to<br>-1.86)                       |
| <b>Bhutan</b>                                        | Thalassemi<br>as trait       | 1<br>(1 to 1)                                     | 1<br>(1 to 1)                                     | -0.37<br>(-0.4 to<br>-0.34)                      | 162.44<br>(138.08 to<br>189.62)                      | 83<br>(70.07 to<br>97.61)                            | -2.2<br>(-2.24 to<br>-2.17)                        |
| <b>Bhutan</b>                                        | Sickle<br>cell<br>disorders  | 0<br>(0 to 0)                                     | 0<br>(0 to 0)                                     | -0.4<br>(-0.46 to<br>-0.29)                      | 0.06<br>(0.04 to<br>0.09)                            | 0.03<br>(0.02 to<br>0.04)                            | -2.44<br>(-2.5 to<br>-2.39)                        |
| <b>Bhutan</b>                                        | Sickle<br>cell trait         | 0<br>(0 to 0)                                     | 0<br>(0 to 0)                                     | -0.4<br>(-0.43 to<br>-0.34)                      | 28.23<br>(22.76 to<br>35.02)                         | 13.79<br>(11.12 to<br>17)                            | -2.4<br>(-2.45 to<br>-2.35)                        |
| <b>Bhutan</b>                                        | G6PD<br>deficiency           | 1<br>(1 to 1)                                     | 1<br>(1 to 1)                                     | -0.34<br>(-0.38 to<br>-0.3)                      | 169.58<br>(130.91 to<br>211.22)                      | 91.36<br>(70.82 to<br>113.64)                        | -2.21<br>(-2.27 to<br>-2.15)                       |
| <b>Bhutan</b>                                        | G6PD trait                   | 3<br>(2 to 3)                                     | 2<br>(2 to 2)                                     | -0.38<br>(-0.4 to<br>-0.37)                      | 445.15<br>(398.87 to<br>487.08)                      | 223.42<br>(200.16 to<br>244.62)                      | -2.23<br>(-2.27 to<br>-2.18)                       |
| <b>Bolivia<br/>(Plurinatio<br/>nal State<br/>of)</b> | <b>Inherited<br/>anemias</b> | 38<br>(34 to 42)                                  | 57<br>(50 to 64)                                  | 0.51<br>(0.46 to<br>0.56)                        | 586.8<br>(527.72 to<br>647.5)                        | 473.68<br>(418.07 to<br>531.53)                      | -0.93<br>(-1.12 to<br>-0.75)                       |
| <b>Bolivia<br/>(Plurinatio<br/>nal State</b>         | Thalassemi<br>as             | 0<br>(0 to 0)                                     | 0<br>(0 to 0)                                     | 0.61<br>(0.27 to<br>1.11)                        | 0.07<br>(0.05 to<br>0.09)                            | 0.06<br>(0.04 to<br>0.07)                            | -0.33<br>(-0.43 to<br>-0.22)                       |



| Regions                                    | Causes                      | Cases in<br>1990<br>No.×103<br>(95% UI) | Cases in<br>2019<br>No.×103<br>(95% UI) | Change in<br>absolute<br>number<br>(%) | Rates in<br>1990 per<br>100000<br>(95% UI) | Rates in<br>2019 per<br>100000<br>(95% UI) | EAPC<br>from 1990<br>and 2019<br>(95%CI) |
|--------------------------------------------|-----------------------------|-----------------------------------------|-----------------------------------------|----------------------------------------|--------------------------------------------|--------------------------------------------|------------------------------------------|
| of)                                        |                             |                                         |                                         |                                        |                                            |                                            |                                          |
| Bolivia<br>(Plurinatio<br>nal State<br>of) | Thalassemi<br>as trait      | 2<br>(2 to 3)                           | 3<br>(3 to 4)                           | 0.43<br>(0.29 to<br>0.61)              | 33.87<br>(29.47 to<br>38.94)               | 25.95<br>(22.51 to<br>29.74)               | -0.74<br>(-0.88 to<br>-0.6)              |
| Bolivia<br>(Plurinatio<br>nal State<br>of) | Sickle<br>cell<br>disorders | 0<br>(0 to 0)                           | 0<br>(0 to 0)                           | 0.35<br>(0.21 to<br>0.5)               | 0.24<br>(0.16 to<br>0.33)                  | 0.17<br>(0.12 to<br>0.24)                  | -0.98<br>(-1.11 to<br>-0.86)             |
| Bolivia<br>(Plurinatio<br>nal State<br>of) | Sickle<br>cell trait        | 4<br>(3 to 4)                           | 5<br>(4 to 6)                           | 0.34<br>(0.27 to<br>0.42)              | 57.29<br>(46.6 to<br>69.04)                | 41.14<br>(33.8 to<br>49.6)                 | -0.99<br>(-1.13 to<br>-0.85)             |
| Bolivia<br>(Plurinatio<br>nal State<br>of) | G6PD<br>deficiency          | 4<br>(3 to 5)                           | 12<br>(9 to 15)                         | 2.33<br>(2.1 to<br>2.52)               | 56.92<br>(44.28 to<br>72.43)               | 101.21<br>(78.52 to<br>126.22)             | -0.24<br>(-0.96 to<br>0.49)              |
| Bolivia<br>(Plurinatio<br>nal State<br>of) | G6PD trait                  | 28<br>(25 to 31)                        | 37<br>(33 to 41)                        | 0.3<br>(0.24 to<br>0.36)               | 438.42<br>(394.02 to<br>484.65)            | 305.15<br>(273.41 to<br>338.4)             | -1.08<br>(-1.23 to<br>-0.93)             |
| Bosnia and<br>Herzegovina                  | Inherited<br>anemias        | 9<br>(8 to 11)                          | 4<br>(3 to 4)                           | -0.59<br>(-0.6 to<br>-0.58)            | 208.26<br>(184.33 to<br>234.32)            | 117.11<br>(103.79 to<br>131.62)            | -1.85<br>(-2.05 to<br>-1.65)             |
| Bosnia and<br>Herzegovina                  | Thalassemi<br>as            | 0<br>(0 to 0)                           | 0<br>(0 to 0)                           | -0.76<br>(-0.78 to<br>-0.72)           | 1.08<br>(0.71 to<br>1.7)                   | 0.36<br>(0.25 to<br>0.54)                  | -3.37<br>(-3.59 to<br>-3.14)             |
| Bosnia and<br>Herzegovina                  | Thalassemi<br>as trait      | 1<br>(1 to 2)                           | 0<br>(0 to 1)                           | -0.6<br>(-0.63 to<br>-0.56)            | 27.29<br>(22.88 to<br>33.44)               | 15.13<br>(12.73 to<br>18.39)               | -1.74<br>(-1.97 to<br>-1.51)             |
| Bosnia and<br>Herzegovina                  | Sickle<br>cell<br>disorders | 0<br>(0 to 0)                           | 0<br>(0 to 0)                           | -0.56<br>(-0.6 to<br>-0.5)             | 0.11<br>(0.08 to<br>0.15)                  | 0.07<br>(0.05 to<br>0.09)                  | -1.46<br>(-1.6 to<br>-1.31)              |
| Bosnia and<br>Herzegovina                  | Sickle<br>cell trait        | 1<br>(1 to 1)                           | 0<br>(0 to 1)                           | -0.58<br>(-0.6 to<br>-0.56)            | 24.12<br>(20.74 to<br>27.79)               | 13.91<br>(11.91 to<br>15.98)               | -1.58<br>(-1.76 to<br>-1.4)              |
| Bosnia and<br>Herzegovina                  | G6PD<br>deficiency          | 2<br>(2 to 3)                           | 1<br>(1 to 1)                           | -0.57<br>(-0.6 to<br>-0.53)            | 50.89<br>(39.45 to<br>63.51)               | 30.32<br>(23.47 to<br>37.67)               | -2.39<br>(-2.73 to<br>-2.04)             |
| Bosnia and<br>Herzegovina                  | G6PD trait                  | 5<br>(4 to 5)                           | 2<br>(2 to 2)                           | -0.6<br>(-0.6 to<br>-0.6)              | 104.78<br>(92.95 to<br>117.92)             | 57.32<br>(50.85 to<br>64.51)               | -1.7<br>(-1.92 to<br>-1.49)              |
| Botswana                                   | Inherited                   | 12                                      | 13                                      | 0.15                                   | 888.63                                     | 569.67                                     | -1.36                                    |

| Regions                      | Causes                       | Cases in<br>1990<br>No.×103<br>(95% UI) | Cases in<br>2019<br>No.×103<br>(95% UI) | Change in<br>absolute<br>number<br>(%) | Rates in<br>1990 per<br>100000<br>(95% UI) | Rates in<br>2019 per<br>100000<br>(95% UI) | EAPC<br>from 1990<br>and 2019<br>(95%CI) |
|------------------------------|------------------------------|-----------------------------------------|-----------------------------------------|----------------------------------------|--------------------------------------------|--------------------------------------------|------------------------------------------|
|                              | <b>anemias</b>               | (10 to 13)                              | (12 to 15)                              | (0.12 to<br>0.18)                      | (775.93 to<br>1008.11)                     | (498.42 to<br>646.06)                      | (−1.46 to<br>−1.27)                      |
| <b>Botswana</b>              | Thalassemi<br>as             | 0<br>(0 to 0)                           | 0<br>(0 to 0)                           | 1.5<br>(1.03 to<br>2.08)               | 0.06<br>(0.04 to<br>0.09)                  | 0.08<br>(0.05 to<br>0.13)                  | 1<br>(0.84 to<br>1.15)                   |
| <b>Botswana</b>              | Thalassemi<br>as trait       | 0<br>(0 to 0)                           | 0<br>(0 to 1)                           | 0.53<br>(0.38 to<br>0.68)              | 22.41<br>(19.03 to<br>26.31)               | 19.05<br>(15.52 to<br>22.53)               | −0.52<br>(−0.59 to<br>−0.45)             |
| <b>Botswana</b>              | Sickle<br>cell<br>disorders  | 0<br>(0 to 0)                           | 0<br>(0 to 0)                           | 0.18<br>(0.07 to<br>0.29)              | 0.09<br>(0.06 to<br>0.14)                  | 0.06<br>(0.04 to<br>0.09)                  | −1.3<br>(−1.37 to<br>−1.24)              |
| <b>Botswana</b>              | Sickle<br>cell trait         | 0<br>(0 to 0)                           | 0<br>(0 to 1)                           | 0.19<br>(0.12 to<br>0.25)              | 28.61<br>(22.16 to<br>37.16)               | 18.91<br>(14.55 to<br>24.67)               | −1.29<br>(−1.35 to<br>−1.22)             |
| <b>Botswana</b>              | G6PD<br>deficiency           | 4<br>(3 to 5)                           | 4<br>(3 to 5)                           | 0.11<br>(0.03 to<br>0.16)              | 287.06<br>(221.96 to<br>362.37)            | 176.59<br>(135.68 to<br>220.41)            | −1.51<br>(−1.64 to<br>−1.38)             |
| <b>Botswana</b>              | G6PD trait                   | 7<br>(7 to 8)                           | 8<br>(8 to 9)                           | 0.16<br>(0.12 to<br>0.2)               | 550.39<br>(501.94 to<br>594.72)            | 354.97<br>(323.51 to<br>385.17)            | −1.33<br>(−1.42 to<br>−1.25)             |
| <b>Brazil</b>                | <b>Inherited<br/>anemias</b> | 589<br>(576 to<br>603)                  | 573<br>(560 to<br>587)                  | −0.03<br>(−0.03 to<br>−0.02)           | 396.02<br>(386.75 to<br>405.37)            | 264.62<br>(258.45 to<br>270.84)            | −0.92<br>(−1.17 to<br>−0.66)             |
| <b>Brazil</b>                | Thalassemi<br>as             | 0<br>(0 to 0)                           | 0<br>(0 to 0)                           | −0.11<br>(−0.25 to<br>0.09)            | 0.06<br>(0.04 to<br>0.08)                  | 0.03<br>(0.03 to<br>0.05)                  | −1.49<br>(−1.6 to<br>−1.39)              |
| <b>Brazil</b>                | Thalassemi<br>as trait       | 28<br>(24 to 33)                        | 25<br>(22 to 29)                        | −0.1<br>(−0.17 to<br>0)                | 18.83<br>(15.93 to<br>21.99)               | 11.7<br>(9.99 to<br>13.48)                 | −1.45<br>(−1.53 to<br>−1.37)             |
| <b>Brazil</b>                | Sickle<br>cell<br>disorders  | 1<br>(1 to 1)                           | 1<br>(1 to 1)                           | −0.1<br>(−0.16 to<br>−0.03)            | 0.6<br>(0.49 to<br>0.73)                   | 0.37<br>(0.31 to<br>0.45)                  | −2.04<br>(−2.2 to<br>−1.89)              |
| <b>Brazil</b>                | Sickle<br>cell trait         | 77<br>(69 to 85)                        | 78<br>(70 to 86)                        | 0.02<br>(−0.02 to<br>0.05)             | 51.43<br>(46.03 to<br>57.27)               | 35.9<br>(32.38 to<br>39.69)                | −1.07<br>(−1.16 to<br>−0.98)             |
| <b>Brazil</b>                | G6PD<br>deficiency           | 91<br>(87 to 94)                        | 106<br>(102 to<br>110)                  | 0.17<br>(0.15 to<br>0.19)              | 61.07<br>(58.75 to<br>63.2)                | 49.05<br>(47.16 to<br>50.93)               | 0.15<br>(−0.39 to<br>0.68)               |
| <b>Brazil</b>                | G6PD trait                   | 393<br>(386 to<br>400)                  | 363<br>(356 to<br>369)                  | −0.08<br>(−0.08 to<br>−0.07)           | 264.02<br>(259.14 to<br>268.62)            | 167.56<br>(164.39 to<br>170.45)            | −1.14<br>(−1.37 to<br>−0.91)             |
| <b>Brunei<br/>Darussalam</b> | <b>Inherited<br/>anemias</b> | 1<br>(0 to 1)                           | 0<br>(0 to 0)                           | −0.3<br>(−0.33 to                      | 205.43<br>(175.33 to                       | 85.19<br>(74.65 to                         | −3.26<br>(−3.49 to                       |

| <b>Regions</b>               | <b>Causes</b>                | <b>Cases in<br/>1990<br/>No.×103<br/>(95% UI)</b> | <b>Cases in<br/>2019<br/>No.×103<br/>(95% UI)</b> | <b>Change in<br/>absolute<br/>number<br/>(%)</b> | <b>Rates in<br/>1990 per<br/>100000<br/>(95% UI)</b> | <b>Rates in<br/>2019 per<br/>100000<br/>(95% UI)</b> | <b>EAPC<br/>from 1990<br/>and 2019<br/>(95%CI)</b> |
|------------------------------|------------------------------|---------------------------------------------------|---------------------------------------------------|--------------------------------------------------|------------------------------------------------------|------------------------------------------------------|----------------------------------------------------|
|                              |                              |                                                   |                                                   | −0.26)                                           | 237.26)                                              | 96.88)                                               | −3.04)                                             |
| <b>Brunei<br/>Darussalam</b> | Thalassemi<br>as             | 0<br>(0 to 0)                                     | 0<br>(0 to 0)                                     | −0.25<br>(−0.34 to<br>−0.14)                     | 1.25<br>(0.81 to<br>1.97)                            | 0.56<br>(0.36 to<br>0.88)                            | −3.01<br>(−3.17 to<br>−2.85)                       |
| <b>Brunei<br/>Darussalam</b> | Thalassemi<br>as trait       | 0<br>(0 to 0)                                     | 0<br>(0 to 0)                                     | 0.57<br>(0.3 to<br>0.89)                         | 7.77<br>(6 to 9.91)                                  | 7.22<br>(5.93 to<br>8.72)                            | −0.7<br>(−1 to<br>−0.39)                           |
| <b>Brunei<br/>Darussalam</b> | Sickle<br>cell<br>disorders  | 0<br>(0 to 0)                                     | 0<br>(0 to 0)                                     | −0.08<br>(−0.27 to<br>0.04)                      | 0.03<br>(0.02 to<br>0.04)                            | 0.01<br>(0.01 to<br>0.02)                            | −2.21<br>(−2.38 to<br>−2.05)                       |
| <b>Brunei<br/>Darussalam</b> | Sickle<br>cell trait         | 0<br>(0 to 0)                                     | 0<br>(0 to 0)                                     | −0.07<br>(−0.18 to<br>0.05)                      | 12.74<br>(10.09 to<br>15.71)                         | 7.03<br>(5.55 to<br>8.7)                             | −2.21<br>(−2.36 to<br>−2.06)                       |
| <b>Brunei<br/>Darussalam</b> | G6PD<br>deficiency           | 0<br>(0 to 0)                                     | 0<br>(0 to 0)                                     | −0.76<br>(−0.78 to<br>−0.73)                     | 58.85<br>(44.99 to<br>73.59)                         | 8.51<br>(6.51 to<br>10.76)                           | −6.6<br>(−7.85 to<br>−5.35)                        |
| <b>Brunei<br/>Darussalam</b> | G6PD trait                   | 0<br>(0 to 0)                                     | 0<br>(0 to 0)                                     | −0.16<br>(−0.2 to<br>−0.11)                      | 124.79<br>(108.43 to<br>143.64)                      | 61.86<br>(53.28 to<br>70.97)                         | −2.65<br>(−2.74 to<br>−2.56)                       |
| <b>Bulgaria</b>              | <b>Inherited<br/>anemias</b> | 19<br>(17 to 21)                                  | 11<br>(10 to 12)                                  | −0.41<br>(−0.42 to<br>−0.4)                      | 215.94<br>(192.58 to<br>242.37)                      | 159.29<br>(142.67 to<br>177.49)                      | −0.2<br>(−0.54 to<br>0.16)                         |
| <b>Bulgaria</b>              | Thalassemi<br>as             | 0<br>(0 to 0)                                     | 0<br>(0 to 0)                                     | −0.72<br>(−0.77 to<br>−0.66)                     | 1.57<br>(1.15 to<br>2.12)                            | 0.55<br>(0.39 to<br>0.8)                             | −2.87<br>(−3.39 to<br>−2.34)                       |
| <b>Bulgaria</b>              | Thalassemi<br>as trait       | 3<br>(2 to 3)                                     | 2<br>(1 to 2)                                     | −0.38<br>(−0.41 to<br>−0.34)                     | 30.28<br>(25.89 to<br>35.49)                         | 23.69<br>(20.18 to<br>27.52)                         | 0.02<br>(−0.33 to<br>0.36)                         |
| <b>Bulgaria</b>              | Sickle<br>cell<br>disorders  | 0<br>(0 to 0)                                     | 0<br>(0 to 0)                                     | −0.23<br>(−0.32 to<br>−0.13)                     | 0.1<br>(0.08 to<br>0.13)                             | 0.1<br>(0.07 to<br>0.13)                             | 0.46<br>(0.16 to<br>0.76)                          |
| <b>Bulgaria</b>              | Sickle<br>cell trait         | 2<br>(2 to 2)                                     | 1<br>(1 to 1)                                     | −0.32<br>(−0.36 to<br>−0.28)                     | 20.26<br>(17.39 to<br>23.44)                         | 17.2<br>(14.63 to<br>19.92)                          | 0.18<br>(−0.13 to<br>0.49)                         |
| <b>Bulgaria</b>              | G6PD<br>deficiency           | 4<br>(3 to 5)                                     | 2<br>(2 to 3)                                     | −0.5<br>(−0.5 to<br>−0.49)                       | 48.28<br>(37.23 to<br>60.41)                         | 30.44<br>(23.54 to<br>38)                            | −0.79<br>(−1.21 to<br>−0.36)                       |
| <b>Bulgaria</b>              | G6PD trait                   | 10<br>(9 to 11)                                   | 6<br>(5 to 7)                                     | −0.4<br>(−0.4 to<br>−0.4)                        | 115.44<br>(103 to<br>128.44)                         | 87.32<br>(77.91 to<br>97.15)                         | −0.07<br>(−0.42 to<br>0.28)                        |
| <b>Burkina<br/>Faso</b>      | <b>Inherited<br/>anemias</b> | 305<br>(295 to<br>317)                            | 588<br>(530 to<br>647)                            | 0.92<br>(0.75 to<br>1.11)                        | 3195.97<br>(3081.68 to<br>3312.35)                   | 2590.21<br>(2337.45 to<br>2852.36)                   | −0.75<br>(−0.83 to<br>−0.67)                       |

| <b>Regions</b> | <b>Causes</b>         | <b>Cases in<br/>1990<br/>No.×103<br/>(95% UI)</b> | <b>Cases in<br/>2019<br/>No.×103<br/>(95% UI)</b> | <b>Change in<br/>absolute<br/>number<br/>(%)</b> | <b>Rates in<br/>1990 per<br/>100000<br/>(95% UI)</b> | <b>Rates in<br/>2019 per<br/>100000<br/>(95% UI)</b> | <b>EAPC<br/>from 1990<br/>and 2019<br/>(95%CI)</b> |
|----------------|-----------------------|---------------------------------------------------|---------------------------------------------------|--------------------------------------------------|------------------------------------------------------|------------------------------------------------------|----------------------------------------------------|
| Burkina Faso   | Thalassemias          | 0<br>(0 to 0)                                     | 0<br>(0 to 0)                                     | 1.65<br>(1.33 to 2.05)                           | 0.4<br>(0.3 to 0.53)                                 | 0.45<br>(0.33 to 0.59)                               | 0.36<br>(0.31 to 0.42)                             |
| Burkina Faso   | Thalassemias trait    | 9<br>(8 to 11)                                    | 21<br>(18 to 24)                                  | 1.28<br>(1.17 to 1.39)                           | 95.91<br>(82.81 to 111.05)                           | 91.91<br>(79.52 to 105.6)                            | -0.17<br>(-0.21 to -0.13)                          |
| Burkina Faso   | Sickle cell disorders | 15<br>(14 to 17)                                  | 22<br>(18 to 27)                                  | 0.45<br>(0.2 to 0.7)                             | 161.95<br>(144.14 to 182.27)                         | 98.79<br>(80.25 to 120.79)                           | -1.72<br>(-1.96 to -1.49)                          |
| Burkina Faso   | Sickle cell trait     | 103<br>(96 to 110)                                | 185<br>(164 to 209)                               | 0.8<br>(0.61 to 0.99)                            | 1074.27<br>(1000.12 to 1149.04)                      | 814.2<br>(722.19 to 921.26)                          | -1.04<br>(-1.3 to -0.78)                           |
| Burkina Faso   | G6PD deficiency       | 84<br>(79 to 89)                                  | 167<br>(129 to 207)                               | 0.98<br>(0.54 to 1.46)                           | 882.04<br>(829.8 to 936.05)                          | 734.66<br>(568.79 to 912.74)                         | -0.6<br>(-0.78 to -0.41)                           |
| Burkina Faso   | G6PD trait            | 94<br>(92 to 95)                                  | 193<br>(179 to 205)                               | 1.06<br>(0.91 to 1.19)                           | 981.4<br>(963.85 to 997.85)                          | 850.22<br>(787.48 to 905.22)                         | -0.51<br>(-0.54 to -0.47)                          |
| Burundi        | Inherited anemias     | 94<br>(84 to 105)                                 | 151<br>(135 to 168)                               | 0.61<br>(0.57 to 0.65)                           | 1687.06<br>(1500.45 to 1880.72)                      | 1268.05<br>(1133.67 to 1411.39)                      | -0.77<br>(-0.91 to -0.63)                          |
| Burundi        | Thalassemias          | 0<br>(0 to 0)                                     | 0<br>(0 to 0)                                     | 2.95<br>(2.37 to 3.75)                           | 0.1<br>(0.06 to 0.15)                                | 0.18<br>(0.1 to 0.28)                                | 2.02<br>(1.86 to 2.18)                             |
| Burundi        | Thalassemias trait    | 2<br>(1 to 2)                                     | 4<br>(3 to 5)                                     | 1.44<br>(1.24 to 1.7)                            | 27.95<br>(22.01 to 34.06)                            | 31.84<br>(24.84 to 39.11)                            | 0.51<br>(0.43 to 0.59)                             |
| Burundi        | Sickle cell disorders | 0<br>(0 to 0)                                     | 0<br>(0 to 0)                                     | 0.6<br>(0.39 to 0.76)                            | 4.07<br>(3.15 to 5.28)                               | 3.04<br>(2.39 to 3.98)                               | -0.9<br>(-1 to -0.8)                               |
| Burundi        | Sickle cell trait     | 15<br>(13 to 17)                                  | 25<br>(22 to 28)                                  | 0.68<br>(0.56 to 0.76)                           | 265.11<br>(234.4 to 302.41)                          | 207.56<br>(184.15 to 237.8)                          | -0.7<br>(-0.78 to -0.62)                           |
| Burundi        | G6PD deficiency       | 28<br>(22 to 35)                                  | 40<br>(31 to 49)                                  | 0.43<br>(0.35 to 0.5)                            | 499.83<br>(386.99 to 623.44)                         | 333.9<br>(258.95 to 414.23)                          | -1.17<br>(-1.42 to -0.91)                          |
| Burundi        | G6PD trait            | 50<br>(46 to 53)                                  | 83<br>(75 to 89)                                  | 0.66<br>(0.63 to 0.71)                           | 890.01<br>(818.65 to 955.83)                         | 691.52<br>(631.85 to 746.91)                         | -0.63<br>(-0.75 to -0.52)                          |
| Cabo Verde     | Inherited anemias     | 3<br>(3 to 3)                                     | 3<br>(2 to 3)                                     | -0.04<br>(-0.06 to -0.02)                        | 802.56<br>(729.45 to 879.12)                         | 480.2<br>(433.64 to 528.84)                          | -1.61<br>(-1.7 to -1.52)                           |
| Cabo Verde     | Thalassemias          | 0                                                 | 0                                                 | 0.18                                             | 0.18                                                 | 0.13                                                 | -0.95                                              |

| Regions    | Causes                      | Cases in<br>1990<br>No.×103<br>(95% UI) | Cases in<br>2019<br>No.×103<br>(95% UI) | Change in<br>absolute<br>number<br>(%) | Rates in<br>1990 per<br>100000<br>(95% UI) | Rates in<br>2019 per<br>100000<br>(95% UI) | EAPC<br>from 1990<br>and 2019<br>(95%CI) |
|------------|-----------------------------|-----------------------------------------|-----------------------------------------|----------------------------------------|--------------------------------------------|--------------------------------------------|------------------------------------------|
|            | as                          | (0 to 0)                                | (0 to 0)                                | (0 to 0.42)                            | (0.13 to<br>0.27)                          | (0.09 to<br>0.19)                          | (−1.02 to<br>−0.89)                      |
| Cabo Verde | Thalassemi<br>as trait      | 0<br>(0 to 0)                           | 0<br>(0 to 0)                           | 0.01<br>(−0.06 to<br>0.08)             | 53.75<br>(44.78 to<br>66.23)               | 33.84<br>(28.36 to<br>40.67)               | −1.48<br>(−1.56 to<br>−1.41)             |
| Cabo Verde | Sickle<br>cell<br>disorders | 0<br>(0 to 0)                           | 0<br>(0 to 0)                           | −0.09<br>(−0.15 to<br>−0.03)           | 2.6<br>(1.97 to<br>3.33)                   | 1.47<br>(1.14 to<br>1.9)                   | −1.79<br>(−1.9 to<br>−1.68)              |
| Cabo Verde | Sickle<br>cell trait        | 0<br>(0 to 0)                           | 0<br>(0 to 0)                           | −0.08<br>(−0.12 to<br>−0.05)           | 116.88<br>(101.92 to<br>134.03)            | 67.15<br>(58.06 to<br>77.26)               | −1.73<br>(−1.84 to<br>−1.62)             |
| Cabo Verde | G6PD<br>deficiency          | 0<br>(0 to 0)                           | 0<br>(0 to 1)                           | 0.09<br>(0.01 to<br>0.17)              | 111.32<br>(88.24 to<br>137.44)             | 75.64<br>(58.16 to<br>94.95)               | −0.96<br>(−1.14 to<br>−0.78)             |
| Cabo Verde | G6PD trait                  | 2<br>(2 to 2)                           | 2<br>(2 to 2)                           | −0.07<br>(−0.08 to<br>−0.04)           | 517.83<br>(469.27 to<br>563.32)            | 301.97<br>(273.75 to<br>329.53)            | −1.75<br>(−1.84 to<br>−1.66)             |
| Cambodia   | Inherited<br>anemias        | 171<br>(153 to<br>191)                  | 150<br>(135 to<br>166)                  | −0.12<br>(−0.14 to<br>−0.1)            | 1648.13<br>(1474.12 to<br>1840.62)         | 905.67<br>(813.56 to<br>1002.68)           | −1.61<br>(−1.93 to<br>−1.29)             |
| Cambodia   | Thalassemi<br>as            | 3<br>(2 to 4)                           | 3<br>(3 to 4)                           | 0.2<br>(0.08 to<br>0.3)                | 27.4<br>(22.43 to<br>33.75)                | 20.63<br>(16.33 to<br>26.32)               | −0.87<br>(−1.09 to<br>−0.64)             |
| Cambodia   | Thalassemi<br>as trait      | 44<br>(40 to 49)                        | 44<br>(40 to 48)                        | −0.01<br>(−0.05 to<br>0.02)            | 426.3<br>(387.57 to<br>473.2)              | 262.81<br>(239.85 to<br>289.34)            | −1.56<br>(−1.76 to<br>−1.36)             |
| Cambodia   | Sickle<br>cell<br>disorders | 0<br>(0 to 0)                           | 0<br>(0 to 0)                           | −0.16<br>(−0.25 to<br>0)               | 0.04<br>(0.03 to<br>0.06)                  | 0.02<br>(0.01 to<br>0.03)                  | −2.1<br>(−2.32 to<br>−1.87)              |
| Cambodia   | Sickle<br>cell trait        | 2<br>(2 to 3)                           | 2<br>(2 to 2)                           | −0.17<br>(−0.21 to<br>−0.09)           | 23.78<br>(19.46 to<br>28.49)               | 12.41<br>(10.17 to<br>14.73)               | −2.12<br>(−2.33 to<br>−1.9)              |
| Cambodia   | G6PD<br>deficiency          | 50<br>(38 to 62)                        | 41<br>(32 to 51)                        | −0.16<br>(−0.23 to<br>−0.1)            | 477.44<br>(369.01 to<br>593.06)            | 249.9<br>(192.77 to<br>309.91)             | −1.65<br>(−2.02 to<br>−1.28)             |
| Cambodia   | G6PD trait                  | 72<br>(65 to 78)                        | 60<br>(54 to 65)                        | −0.17<br>(−0.17 to<br>−0.17)           | 693.18<br>(629.95 to<br>755.45)            | 359.9<br>(327.06 to<br>392.28)             | −1.63<br>(−2.01 to<br>−1.25)             |
| Cameroon   | Inherited<br>anemias        | 186<br>(173 to<br>200)                  | 372<br>(343 to<br>403)                  | 1<br>(0.93 to<br>1.09)                 | 1789.38<br>(1664.05 to<br>1921.73)         | 1279.35<br>(1178.35 to<br>1384)            | −1.01<br>(−1.23 to<br>−0.8)              |
| Cameroon   | Thalassemi<br>as            | 0<br>(0 to 0)                           | 0<br>(0 to 0)                           | 1.6<br>(1.24 to                        | 0.34<br>(0.23 to                           | 0.31<br>(0.22 to                           | −0.12<br>(−0.32 to                       |

| Regions                        | Causes                      | Cases in<br>1990<br>No.×103<br>(95% UI) | Cases in<br>2019<br>No.×103<br>(95% UI) | Change in<br>absolute<br>number<br>(%) | Rates in<br>1990 per<br>100000<br>(95% UI) | Rates in<br>2019 per<br>100000<br>(95% UI) | EAPC<br>from 1990<br>and 2019<br>(95%CI) |
|--------------------------------|-----------------------------|-----------------------------------------|-----------------------------------------|----------------------------------------|--------------------------------------------|--------------------------------------------|------------------------------------------|
|                                |                             |                                         |                                         | 2.06)                                  | 0.49)                                      | 0.44)                                      | 0.08)                                    |
| Cameroon                       | Thalassemi<br>as trait      | 9<br>(7 to 11)                          | 19<br>(16 to 23)                        | 1.19<br>(1.07 to<br>1.33)              | 84.92<br>(70.02 to<br>103.28)              | 66.45<br>(55.69 to<br>79.48)               | -0.69<br>(-0.9 to<br>-0.49)              |
| Cameroon                       | Sickle<br>cell<br>disorders | 4<br>(3 to 4)                           | 8<br>(7 to 10)                          | 1.14<br>(0.79 to<br>1.58)              | 36.27<br>(32.79 to<br>40.06)               | 27.71<br>(22.61 to<br>35.32)               | -0.89<br>(-1.12 to<br>-0.65)             |
| Cameroon                       | Sickle<br>cell trait        | 75<br>(72 to 79)                        | 152<br>(139 to<br>171)                  | 1.03<br>(0.87 to<br>1.21)              | 722.87<br>(689.72 to<br>757.38)            | 523.58<br>(477.08 to<br>586.05)            | -0.99<br>(-1.22 to<br>-0.77)             |
| Cameroon                       | G6PD<br>deficiency          | 24<br>(19 to 30)                        | 48<br>(37 to 60)                        | 0.96<br>(0.89 to<br>1.08)              | 234.22<br>(180.98 to<br>291.23)            | 164.1<br>(126.61 to<br>206.75)             | -1.06<br>(-1.26 to<br>-0.86)             |
| Cameroon                       | G6PD trait                  | 74<br>(67 to 80)                        | 145<br>(131 to<br>157)                  | 0.96<br>(0.96 to<br>0.97)              | 710.77<br>(644.3 to<br>771.92)             | 497.19<br>(451.29 to<br>539.69)            | -1.06<br>(-1.27 to<br>-0.86)             |
| Canada                         | Inherited<br>anemias        | 72<br>(63 to 82)                        | 57<br>(49 to 65)                        | -0.21<br>(-0.25 to<br>-0.18)           | 264.48<br>(229.92 to<br>302.41)            | 155.59<br>(134.65 to<br>178.23)            | -1.57<br>(-1.81 to<br>-1.32)             |
| Canada                         | Thalassemi<br>as            | 0<br>(0 to 0)                           | 0<br>(0 to 0)                           | -0.21<br>(-0.34 to<br>-0.07)           | 0.07<br>(0.05 to<br>0.09)                  | 0.04<br>(0.03 to<br>0.06)                  | -2.18<br>(-2.38 to<br>-1.97)             |
| Canada                         | Thalassemi<br>as trait      | 2<br>(1 to 2)                           | 1<br>(1 to 2)                           | -0.14<br>(-0.32 to<br>0.04)            | 5.56<br>(4.7 to<br>6.51)                   | 3.59<br>(2.96 to<br>4.26)                  | -0.99<br>(-1.3 to<br>-0.68)              |
| Canada                         | Sickle<br>cell<br>disorders | 0<br>(0 to 0)                           | 0<br>(0 to 0)                           | -0.85<br>(-0.9 to<br>-0.77)            | 0.08<br>(0.05 to<br>0.12)                  | 0.01<br>(0.01 to<br>0.01)                  | -6.76<br>(-8.48 to<br>-5.01)             |
| Canada                         | Sickle<br>cell trait        | 2<br>(1 to 2)                           | 1<br>(1 to 2)                           | -0.16<br>(-0.35 to<br>-0.07)           | 5.81<br>(4.85 to<br>6.86)                  | 3.63<br>(2.9 to<br>4.43)                   | -1.31<br>(-1.6 to<br>-1.03)              |
| Canada                         | G6PD<br>deficiency          | 19<br>(15 to 24)                        | 15<br>(12 to 19)                        | -0.2<br>(-0.25 to<br>-0.14)            | 70.03<br>(54.12 to<br>87.07)               | 41.65<br>(32.13 to<br>52.51)               | -1.62<br>(-1.87 to<br>-1.37)             |
| Canada                         | G6PD trait                  | 50<br>(45 to 55)                        | 39<br>(35 to 43)                        | -0.22<br>(-0.26 to<br>-0.19)           | 182.93<br>(164.38 to<br>202.04)            | 106.67<br>(95.49 to<br>118.3)              | -1.57<br>(-1.82 to<br>-1.33)             |
| Central<br>African<br>Republic | Inherited<br>anemias        | 65<br>(59 to 71)                        | 101<br>(92 to 111)                      | 0.55<br>(0.51 to<br>0.59)              | 2376.47<br>(2161.09 to<br>2599.21)         | 1908.83<br>(1732.81 to<br>2103.6)          | -0.71<br>(-0.78 to<br>-0.64)             |
| Central<br>African<br>Republic | Thalassemi<br>as            | 0<br>(0 to 0)                           | 0<br>(0 to 0)                           | 2.2<br>(1.76 to<br>2.72)               | 0.11<br>(0.07 to<br>0.16)                  | 0.18<br>(0.1 to<br>0.28)                   | 1.56<br>(1.4 to<br>1.73)                 |



| <b>Regions</b>           | <b>Causes</b>               | <b>Cases in<br/>1990<br/>No.×103<br/>(95% UI)</b> | <b>Cases in<br/>2019<br/>No.×103<br/>(95% UI)</b> | <b>Change in<br/>absolute<br/>number<br/>(%)</b> | <b>Rates in<br/>1990 per<br/>100000<br/>(95% UI)</b> | <b>Rates in<br/>2019 per<br/>100000<br/>(95% UI)</b> | <b>EAPC<br/>from 1990<br/>and 2019<br/>(95%CI)</b> |
|--------------------------|-----------------------------|---------------------------------------------------|---------------------------------------------------|--------------------------------------------------|------------------------------------------------------|------------------------------------------------------|----------------------------------------------------|
| Central African Republic | Thalassemi<br>as trait      | 1<br>(1 to 1)                                     | 2<br>(2 to 2)                                     | 0.98<br>(0.84 to<br>1.13)                        | 37.55<br>(31.26 to<br>44.42)                         | 38.48<br>(31.44 to<br>46.36)                         | 0.05<br>(−0.03 to<br>0.13)                         |
| Central African Republic | Sickle<br>cell<br>disorders | 1<br>(1 to 2)                                     | 2<br>(1 to 2)                                     | 0.52<br>(0.38 to<br>0.68)                        | 45.34<br>(35.59 to<br>58.72)                         | 35.74<br>(27.86 to<br>47.03)                         | −0.76<br>(−0.82 to<br>−0.7)                        |
| Central African Republic | Sickle<br>cell trait        | 23<br>(20 to 25)                                  | 35<br>(31 to 39)                                  | 0.54<br>(0.47 to<br>0.61)                        | 822.03<br>(738.55 to<br>924.95)                      | 653.99<br>(585.57 to<br>741.41)                      | −0.73<br>(−0.8 to<br>−0.67)                        |
| Central African Republic | G6PD<br>deficiency          | 15<br>(12 to 19)                                  | 23<br>(18 to 29)                                  | 0.56<br>(0.46 to<br>0.66)                        | 546.31<br>(422.22 to<br>677.9)                       | 440.79<br>(341.49 to<br>552.03)                      | −0.73<br>(−0.81 to<br>−0.65)                       |
| Central African Republic | G6PD trait                  | 25<br>(23 to 27)                                  | 39<br>(36 to 42)                                  | 0.54<br>(0.5 to<br>0.58)                         | 925.13<br>(853.3 to<br>988.9)                        | 739.64<br>(683.05 to<br>792.93)                      | −0.71<br>(−0.78 to<br>−0.64)                       |
| Chad                     | Inherited<br>anemias        | 108<br>(98 to 119)                                | 265<br>(240 to<br>292)                            | 1.46<br>(1.39 to<br>1.52)                        | 1791.43<br>(1619.68 to<br>1968.92)                   | 1617.72<br>(1461.37 to<br>1782.15)                   | −0.37<br>(−0.42 to<br>−0.32)                       |
| Chad                     | Thalassemi<br>as            | 0<br>(0 to 0)                                     | 0<br>(0 to 0)                                     | 2.36<br>(1.92 to<br>2.89)                        | 0.36<br>(0.27 to<br>0.48)                            | 0.45<br>(0.32 to<br>0.6)                             | 0.66<br>(0.6 to<br>0.72)                           |
| Chad                     | Thalassemi<br>as trait      | 6<br>(5 to 7)                                     | 16<br>(14 to 18)                                  | 1.76<br>(1.64 to<br>1.92)                        | 95.78<br>(82.04 to<br>111.77)                        | 97.21<br>(83.72 to<br>112.3)                         | 0<br>(−0.04 to<br>0.05)                            |
| Chad                     | Sickle<br>cell<br>disorders | 1<br>(1 to 1)                                     | 2<br>(1 to 2)                                     | 1.41<br>(1.21 to<br>1.6)                         | 11.35<br>(9.21 to<br>13.71)                          | 10.04<br>(8.27 to<br>12.21)                          | −0.43<br>(−0.48 to<br>−0.38)                       |
| Chad                     | Sickle<br>cell trait        | 27<br>(25 to 30)                                  | 67<br>(61 to 74)                                  | 1.44<br>(1.33 to<br>1.53)                        | 455.8<br>(410.9 to<br>501)                           | 407.73<br>(369.81 to<br>449.62)                      | −0.4<br>(−0.45 to<br>−0.36)                        |
| Chad                     | G6PD<br>deficiency          | 24<br>(19 to 30)                                  | 57<br>(44 to 71)                                  | 1.37<br>(1.18 to<br>1.58)                        | 396.94<br>(307.63 to<br>492.97)                      | 346.15<br>(267.56 to<br>432.04)                      | −0.45<br>(−0.52 to<br>−0.38)                       |
| Chad                     | G6PD trait                  | 50<br>(45 to 54)                                  | 124<br>(112 to<br>135)                            | 1.48<br>(1.39 to<br>1.55)                        | 831.19<br>(753.63 to<br>904.27)                      | 756.14<br>(684.57 to<br>820.83)                      | −0.36<br>(−0.41 to<br>−0.32)                       |
| Chile                    | Inherited<br>anemias        | 30<br>(26 to 34)                                  | 22<br>(20 to 25)                                  | −0.25<br>(−0.28 to<br>−0.22)                     | 225.26<br>(198.52 to<br>254.58)                      | 122.87<br>(108.79 to<br>138.74)                      | −1.85<br>(−2.03 to<br>−1.67)                       |
| Chile                    | Thalassemi<br>as            | 0<br>(0 to 0)                                     | 0<br>(0 to 0)                                     | −0.22<br>(−0.36 to<br>0.02)                      | 0.28<br>(0.18 to<br>0.41)                            | 0.16<br>(0.12 to<br>0.22)                            | −1.64<br>(−1.99 to<br>−1.3)                        |
| Chile                    | Thalassemi                  | 2                                                 | 3                                                 | 0.36                                             | 15.55                                                | 15.47                                                | 0.47                                               |

| Regions  | Causes                | Cases in 1990<br>No.×103<br>(95% UI) | Cases in 2019<br>No.×103<br>(95% UI) | Change in absolute number<br>(%) | Rates in 1990 per 100000<br>(95% UI) | Rates in 2019 per 100000<br>(95% UI) | EAPC from 1990 and 2019<br>(95%CI) |
|----------|-----------------------|--------------------------------------|--------------------------------------|----------------------------------|--------------------------------------|--------------------------------------|------------------------------------|
|          | as trait              | (2 to 2)                             | (2 to 3)                             | (0.21 to 0.53)                   | (13.31 to 18.21)                     | (13.63 to 17.39)                     | (0.21 to 0.73)                     |
| Chile    | Sickle cell disorders | 0<br>(0 to 0)                        | 0<br>(0 to 0)                        | -0.25<br>(-0.5 to -0.12)         | 0<br>(0 to 0.01)                     | 0<br>(0 to 0)                        | -1.53<br>(-1.82 to -1.24)          |
| Chile    | Sickle cell trait     | 1<br>(0 to 1)                        | 0<br>(0 to 1)                        | -0.25<br>(-0.47 to -0.21)        | 4.17<br>(2.4 to 6.35)                | 2.28<br>(1.29 to 3.44)               | -1.6<br>(-1.84 to -1.35)           |
| Chile    | G6PD deficiency       | 5<br>(4 to 6)                        | 3<br>(3 to 4)                        | -0.27<br>(-0.31 to -0.23)        | 34.21<br>(26.52 to 43.62)            | 18.3<br>(14.15 to 22.91)             | -2.02<br>(-2.19 to -1.84)          |
| Chile    | G6PD trait            | 23<br>(20 to 25)                     | 16<br>(14 to 18)                     | -0.31<br>(-0.33 to -0.27)        | 171.04<br>(152.05 to 191.27)         | 86.66<br>(76.7 to 97.49)             | -2.11<br>(-2.3 to -1.93)           |
| China    | Inherited anemias     | 6133<br>(5719 to 6696)               | 4025<br>(3790 to 4339)               | -0.34<br>(-0.36 to -0.33)        | 518.17<br>(483.18 to 565.73)         | 282.95<br>(266.48 to 305.08)         | -2.05<br>(-2.37 to -1.74)          |
| China    | Thalassemias          | 101<br>(72 to 143)                   | 60<br>(43 to 86)                     | -0.4<br>(-0.44 to -0.36)         | 8.51<br>(6.06 to 12.08)              | 4.23<br>(3.04 to 6.04)               | -2.34<br>(-2.85 to -1.84)          |
| China    | Thalassemias trait    | 2543<br>(2164 to 3051)               | 1475<br>(1261 to 1748)               | -0.42<br>(-0.44 to -0.4)         | 214.83<br>(182.84 to 257.76)         | 103.73<br>(88.68 to 122.9)           | -2.27<br>(-2.82 to -1.71)          |
| China    | Sickle cell disorders | 1<br>(1 to 2)                        | 0<br>(0 to 1)                        | -0.56<br>(-0.57 to -0.53)        | 0.09<br>(0.06 to 0.13)               | 0.03<br>(0.02 to 0.05)               | -3.53<br>(-4.22 to -2.84)          |
| China    | Sickle cell trait     | 303<br>(249 to 365)                  | 158<br>(132 to 190)                  | -0.48<br>(-0.49 to -0.46)        | 25.58<br>(20.99 to 30.8)             | 11.13<br>(9.31 to 13.33)             | -2.8<br>(-3.41 to -2.19)           |
| China    | G6PD deficiency       | 841<br>(808 to 872)                  | 724<br>(691 to 753)                  | -0.14<br>(-0.17 to -0.12)        | 71.04<br>(68.26 to 73.65)            | 50.89<br>(48.6 to 52.97)             | -0.89<br>(-1.08 to -0.7)           |
| China    | G6PD trait            | 2345<br>(2303 to 2382)               | 1606<br>(1576 to 1635)               | -0.32<br>(-0.32 to -0.31)        | 198.12<br>(194.6 to 201.24)          | 112.94<br>(110.79 to 114.96)         | -2.23<br>(-2.43 to -2.03)          |
| Colombia | Inherited anemias     | 210<br>(186 to 235)                  | 180<br>(159 to 202)                  | -0.15<br>(-0.16 to -0.11)        | 646.5<br>(572.18 to 722.57)          | 376.47<br>(333.1 to 423.5)           | -2.23<br>(-2.5 to -1.96)           |
| Colombia | Thalassemias          | 0<br>(0 to 0)                        | 0<br>(0 to 0)                        | 0.36<br>(-0.15 to 1.49)          | 0.02<br>(0.01 to 0.03)               | 0.01<br>(0.01 to 0.02)               | -0.46<br>(-0.7 to -0.22)           |
| Colombia | Thalassemias trait    | 4<br>(3 to 5)                        | 4<br>(3 to 4)                        | -0.01<br>(-0.15 to               | 11.78<br>(9.73 to                    | 7.97<br>(6.62 to                     | -1.49<br>(-1.57 to                 |

| Regions  | Causes                      | Cases in<br>1990<br>No.×103<br>(95% UI) | Cases in<br>2019<br>No.×103<br>(95% UI) | Change in<br>absolute<br>number<br>(%) | Rates in<br>1990 per<br>100000<br>(95% UI) | Rates in<br>2019 per<br>100000<br>(95% UI) | EAPC<br>from 1990<br>and 2019<br>(95%CI) |
|----------|-----------------------------|-----------------------------------------|-----------------------------------------|----------------------------------------|--------------------------------------------|--------------------------------------------|------------------------------------------|
|          |                             |                                         |                                         | 0.21)                                  | 14.42)                                     | 9.36)                                      | -1.41)                                   |
| Colombia | Sickle<br>cell<br>disorders | 0<br>(0 to 0)                           | 0<br>(0 to 0)                           | -0.16<br>(-0.24 to<br>-0.05)           | 0.46<br>(0.31 to<br>0.66)                  | 0.26<br>(0.18 to<br>0.37)                  | -1.98<br>(-2.02 to<br>-1.94)             |
| Colombia | Sickle<br>cell trait        | 9<br>(8 to 10)                          | 7<br>(6 to 8)                           | -0.18<br>(-0.25 to<br>-0.14)           | 26.52<br>(23.49 to<br>29.96)               | 14.74<br>(13.15 to<br>16.58)               | -1.95<br>(-2.02 to<br>-1.88)             |
| Colombia | G6PD<br>deficiency          | 48<br>(37 to 60)                        | 41<br>(32 to 51)                        | -0.15<br>(-0.2 to<br>-0.1)             | 147.51<br>(113.84 to<br>183.72)            | 85.5<br>(66.18 to<br>106.81)               | -2.54<br>(-3.05 to<br>-2.02)             |
| Colombia | G6PD trait                  | 150<br>(136 to<br>162)                  | 128<br>(116 to<br>140)                  | -0.15<br>(-0.16 to<br>-0.12)           | 460.21<br>(417.91 to<br>497.27)            | 267.98<br>(243.46 to<br>292.21)            | -2.18<br>(-2.4 to<br>-1.96)              |
| Comoros  | Inherited<br>anemias        | 6<br>(6 to 7)                           | 5<br>(4 to 5)                           | -0.24<br>(-0.26 to<br>-0.22)           | 1361.57<br>(1187.7 to<br>1535.19)          | 670.83<br>(590.62 to<br>755.67)            | -2.5<br>(-2.67 to<br>-2.32)              |
| Comoros  | Thalassemi<br>as            | 0<br>(0 to 0)                           | 0<br>(0 to 0)                           | 0.83<br>(0.57 to<br>1.2)               | 0.08<br>(0.05 to<br>0.12)                  | 0.1<br>(0.05 to<br>0.15)                   | 0.2<br>(-0.02 to<br>0.41)                |
| Comoros  | Thalassemi<br>as trait      | 0<br>(0 to 0)                           | 0<br>(0 to 0)                           | 0.14<br>(0.05 to<br>0.26)              | 24.78<br>(19.46 to<br>30.4)                | 18.43<br>(14.56 to<br>22.44)               | -1.26<br>(-1.39 to<br>-1.13)             |
| Comoros  | Sickle<br>cell<br>disorders | 0<br>(0 to 0)                           | 0<br>(0 to 0)                           | -0.18<br>(-0.25 to<br>-0.08)           | 0.54<br>(0.34 to<br>0.83)                  | 0.29<br>(0.18 to<br>0.45)                  | -2.19<br>(-2.28 to<br>-2.1)              |
| Comoros  | Sickle<br>cell trait        | 0<br>(0 to 1)                           | 0<br>(0 to 0)                           | -0.17<br>(-0.22 to<br>-0.12)           | 88.56<br>(68.49 to<br>113.2)               | 47.67<br>(36.96 to<br>61.11)               | -2.21<br>(-2.29 to<br>-2.12)             |
| Comoros  | G6PD<br>deficiency          | 2<br>(2 to 3)                           | 1<br>(1 to 2)                           | -0.32<br>(-0.36 to<br>-0.28)           | 444.16<br>(341.86 to<br>552.39)            | 195.47<br>(151.58 to<br>246.5)             | -2.89<br>(-3.18 to<br>-2.59)             |
| Comoros  | G6PD trait                  | 4<br>(3 to 4)                           | 3<br>(3 to 3)                           | -0.22<br>(-0.24 to<br>-0.19)           | 803.46<br>(735.48 to<br>866.53)            | 408.87<br>(373.08 to<br>441.93)            | -2.37<br>(-2.51 to<br>-2.24)             |
| Congo    | Inherited<br>anemias        | 50<br>(45 to 55)                        | 71<br>(63 to 78)                        | 0.41<br>(0.37 to<br>0.46)              | 2049.99<br>(1847.05 to<br>2258.65)         | 1342.47<br>(1203.96 to<br>1489.15)         | -1.18<br>(-1.43 to<br>-0.93)             |
| Congo    | Thalassemi<br>as            | 0<br>(0 to 0)                           | 0<br>(0 to 0)                           | 1.88<br>(1.44 to<br>2.39)              | 0.09<br>(0.06 to<br>0.14)                  | 0.12<br>(0.07 to<br>0.18)                  | 1.13<br>(0.87 to<br>1.4)                 |
| Congo    | Thalassemi<br>as trait      | 1<br>(1 to 1)                           | 1<br>(1 to 2)                           | 0.81<br>(0.67 to<br>0.97)              | 32.22<br>(26.8 to<br>38.23)                | 27.01<br>(22.04 to<br>31.98)               | -0.36<br>(-0.6 to<br>-0.13)              |

| Regions         | Causes                      | Cases in<br>1990<br>No.×103<br>(95% UI) | Cases in<br>2019<br>No.×103<br>(95% UI) | Change in<br>absolute<br>number<br>(%) | Rates in<br>1990 per<br>100000<br>(95% UI) | Rates in<br>2019 per<br>100000<br>(95% UI) | EAPC<br>from 1990<br>and 2019<br>(95%CI) |
|-----------------|-----------------------------|-----------------------------------------|-----------------------------------------|----------------------------------------|--------------------------------------------|--------------------------------------------|------------------------------------------|
| Congo           | Sickle<br>cell<br>disorders | 1<br>(1 to 1)                           | 1<br>(1 to 1)                           | 0.23<br>(0.1 to<br>0.36)               | 27.04<br>(21.72 to<br>32.92)               | 15.49<br>(12.09 to<br>19.48)               | -1.67<br>(-1.96 to<br>-1.37)             |
| Congo           | Sickle<br>cell trait        | 14<br>(12 to 15)                        | 18<br>(16 to 20)                        | 0.33<br>(0.24 to<br>0.4)               | 563.74<br>(501.76 to<br>622.74)            | 347.42<br>(305.17 to<br>388.39)            | -1.4<br>(-1.66 to<br>-1.14)              |
| Congo           | G6PD<br>deficiency          | 14<br>(11 to 18)                        | 21<br>(16 to 26)                        | 0.46<br>(0.35 to<br>0.59)              | 587.04<br>(463.2 to<br>725.33)             | 397.26<br>(306.38 to<br>493.65)            | -1.1<br>(-1.37 to<br>-0.83)              |
| Congo           | G6PD trait                  | 21<br>(19 to 22)                        | 29<br>(27 to 31)                        | 0.42<br>(0.42 to<br>0.44)              | 839.87<br>(775.05 to<br>897.59)            | 555.16<br>(511.91 to<br>593.41)            | -1.11<br>(-1.35 to<br>-0.86)             |
| Cook<br>Islands | Inherited<br>anemias        | 0<br>(0 to 0)                           | 0<br>(0 to 0)                           | -0.36<br>(-0.37 to<br>-0.35)           | 514.26<br>(457.02 to<br>577.72)            | 347.86<br>(307.13 to<br>390.03)            | -1.37<br>(-1.51 to<br>-1.23)             |
| Cook<br>Islands | Thalassemi<br>as            | 0<br>(0 to 0)                           | 0<br>(0 to 0)                           | -0.5<br>(-0.57 to<br>-0.41)            | 1.99<br>(1.1 to<br>3.21)                   | 1.06<br>(0.58 to<br>1.77)                  | -0.87<br>(-1.99 to<br>0.27)              |
| Cook<br>Islands | Thalassemi<br>as trait      | 0<br>(0 to 0)                           | 0<br>(0 to 0)                           | -0.45<br>(-0.49 to<br>-0.41)           | 71.72<br>(54.98 to<br>89.64)               | 41.8<br>(31.97 to<br>53.19)                | -1.36<br>(-1.82 to<br>-0.9)              |
| Cook<br>Islands | Sickle<br>cell<br>disorders | 0<br>(0 to 0)                           | 0<br>(0 to 0)                           | -0.42<br>(-0.43 to<br>-0.29)           | 0<br>(0 to 0)                              | 0<br>(0 to 0)                              | -1.78<br>(-1.84 to<br>-1.71)             |
| Cook<br>Islands | Sickle<br>cell trait        | 0<br>(0 to 0)                           | 0<br>(0 to 0)                           | -0.42<br>(-0.43 to<br>-0.34)           | 3.02<br>(1.33 to<br>4.87)                  | 1.85<br>(0.8 to<br>2.99)                   | -1.8<br>(-1.87 to<br>-1.74)              |
| Cook<br>Islands | G6PD<br>deficiency          | 0<br>(0 to 0)                           | 0<br>(0 to 0)                           | -0.31<br>(-0.34 to<br>-0.26)           | 107.18<br>(83.24 to<br>134.41)             | 78.7<br>(60.51 to<br>98.29)                | -1.18<br>(-1.35 to<br>-1.01)             |
| Cook<br>Islands | G6PD trait                  | 0<br>(0 to 0)                           | 0<br>(0 to 0)                           | -0.36<br>(-0.37 to<br>-0.35)           | 330.34<br>(297.17 to<br>363.11)            | 224.45<br>(202.56 to<br>244.39)            | -1.46<br>(-1.56 to<br>-1.35)             |
| Costa Rica      | Inherited<br>anemias        | 14<br>(13 to 16)                        | 11<br>(10 to 12)                        | -0.24<br>(-0.29 to<br>-0.19)           | 472.53<br>(419.23 to<br>528.98)            | 230.93<br>(202.18 to<br>258.39)            | -2.2<br>(-2.36 to<br>-2.05)              |
| Costa Rica      | Thalassemi<br>as            | 0<br>(0 to 0)                           | 0<br>(0 to 0)                           | 0.38<br>(-0.18 to<br>2.02)             | 0.01<br>(0.01 to<br>0.02)                  | 0.01<br>(0 to 0.01)                        | -0.26<br>(-0.4 to<br>-0.12)              |
| Costa Rica      | Thalassemi<br>as trait      | 0<br>(0 to 0)                           | 0<br>(0 to 0)                           | 0.01<br>(-0.18 to<br>0.41)             | 6.55<br>(4.79 to<br>8.91)                  | 4.28<br>(3.16 to<br>5.4)                   | -1.29<br>(-1.38 to<br>-1.2)              |
| Costa Rica      | Sickle                      | 0                                       | 0                                       | -0.18                                  | 0.01                                       | 0                                          | -2.24                                    |

| Regions       | Causes                | Cases in<br>1990<br>No.×103<br>(95% UI) | Cases in<br>2019<br>No.×103<br>(95% UI) | Change in<br>absolute<br>number<br>(%) | Rates in<br>1990 per<br>100000<br>(95% UI) | Rates in<br>2019 per<br>100000<br>(95% UI) | EAPC<br>from 1990<br>and 2019<br>(95%CI) |
|---------------|-----------------------|-----------------------------------------|-----------------------------------------|----------------------------------------|--------------------------------------------|--------------------------------------------|------------------------------------------|
|               | cell disorders        | (0 to 0)                                | (0 to 0)                                | (−0.34 to 0.08)                        | (0 to 0.01)                                | (0 to 0.01)                                | (−2.72 to −1.76)                         |
| Costa Rica    | Sickle cell trait     | 0<br>(0 to 0)                           | 0<br>(0 to 0)                           | −0.2<br>(−0.46 to −0.18)               | 2.62<br>(1.18 to 4.12)                     | 1.35<br>(0.63 to 2.15)                     | −2.38<br>(−3.03 to −1.73)                |
| Costa Rica    | G6PD deficiency       | 4<br>(3 to 5)                           | 2<br>(2 to 3)                           | −0.46<br>(−0.53 to −0.38)              | 138.66<br>(112.31 to 167.23)               | 48.14<br>(37.32 to 59.7)                   | −3.19<br>(−3.5 to −2.89)                 |
| Costa Rica    | G6PD trait            | 10<br>(9 to 11)                         | 8<br>(8 to 9)                           | −0.15<br>(−0.21 to −0.11)              | 324.68<br>(296.36 to 353.9)                | 177.14<br>(159.11 to 193.39)               | −1.88<br>(−2.08 to −1.67)                |
| Côte d’Ivoire | Inherited anemias     | 241<br>(222 to 263)                     | 384<br>(354 to 418)                     | 0.59<br>(0.56 to 0.62)                 | 1975.02<br>(1819.25 to 2148.72)            | 1467.09<br>(1353.87 to 1595.35)            | −0.97<br>(−1.05 to −0.89)                |
| Côte d’Ivoire | Thalassemias          | 0<br>(0 to 0)                           | 1<br>(0 to 1)                           | 0.64<br>(0.48 to 0.8)                  | 2.84<br>(2.17 to 3.63)                     | 2.17<br>(1.68 to 2.79)                     | −0.85<br>(−0.94 to −0.76)                |
| Côte d’Ivoire | Thalassemias trait    | 29<br>(26 to 33)                        | 48<br>(42 to 54)                        | 0.63<br>(0.55 to 0.71)                 | 240.87<br>(212.56 to 270.17)               | 183.15<br>(162.01 to 205.76)               | −0.89<br>(−0.98 to −0.81)                |
| Côte d’Ivoire | Sickle cell disorders | 4<br>(3 to 4)                           | 6<br>(5 to 7)                           | 0.53<br>(0.46 to 0.61)                 | 31.93<br>(27.9 to 36.18)                   | 22.88<br>(19.88 to 25.96)                  | −1.1<br>(−1.18 to −1.01)                 |
| Côte d’Ivoire | Sickle cell trait     | 73<br>(68 to 79)                        | 113<br>(104 to 122)                     | 0.54<br>(0.49 to 0.59)                 | 599.88<br>(555.56 to 646.89)               | 431.83<br>(398.12 to 467.91)               | −1.08<br>(−1.16 to −0.99)                |
| Côte d’Ivoire | G6PD deficiency       | 43<br>(33 to 54)                        | 69<br>(53 to 87)                        | 0.59<br>(0.56 to 0.63)                 | 352.29<br>(272.18 to 437.69)               | 262.43<br>(202.87 to 331.01)               | −0.89<br>(−0.99 to −0.78)                |
| Côte d’Ivoire | G6PD trait            | 91<br>(83 to 99)                        | 148<br>(134 to 161)                     | 0.62<br>(0.58 to 0.65)                 | 747.21<br>(676.98 to 813.74)               | 564.62<br>(513.68 to 614.69)               | −0.95<br>(−1.02 to −0.88)                |
| Croatia       | Inherited anemias     | 8<br>(7 to 9)                           | 5<br>(4 to 5)                           | −0.39<br>(−0.41 to −0.37)              | 156.61<br>(135.32 to 179.65)               | 110.46<br>(96.23 to 126.05)                | −0.57<br>(−0.86 to −0.27)                |
| Croatia       | Thalassemias          | 0<br>(0 to 0)                           | 0<br>(0 to 0)                           | −0.6<br>(−0.64 to −0.54)               | 0.8<br>(0.53 to 1.26)                      | 0.37<br>(0.25 to 0.57)                     | −2.23<br>(−2.44 to −2.02)                |
| Croatia       | Thalassemias trait    | 1<br>(1 to 1)                           | 1<br>(1 to 1)                           | −0.32<br>(−0.36 to −0.27)              | 19.62<br>(16.26 to 23.7)                   | 15.46<br>(12.98 to 18.64)                  | −0.5<br>(−0.71 to −0.29)                 |
| Croatia       | Sickle cell           | 0<br>(0 to 0)                           | 0<br>(0 to 0)                           | −0.32<br>(−0.38 to                     | 0.1<br>(0.08 to                            | 0.08<br>(0.06 to                           | −0.59<br>(−0.85 to                       |

| Regions | Causes                      | Cases in<br>1990<br>No.×103<br>(95% UI) | Cases in<br>2019<br>No.×103<br>(95% UI) | Change in<br>absolute<br>number<br>(%) | Rates in<br>1990 per<br>100000<br>(95% UI) | Rates in<br>2019 per<br>100000<br>(95% UI) | EAPC<br>from 1990<br>and 2019<br>(95%CI) |
|---------|-----------------------------|-----------------------------------------|-----------------------------------------|----------------------------------------|--------------------------------------------|--------------------------------------------|------------------------------------------|
|         | disorders                   |                                         |                                         | −0.26)                                 | 0.13)                                      | 0.1)                                       | −0.33)                                   |
| Croatia | Sickle<br>cell trait        | 1<br>(1 to 1)                           | 1<br>(1 to 1)                           | −0.31<br>(−0.34 to<br>−0.28)           | 17.79<br>(15.23 to<br>20.49)               | 14.2<br>(12.22 to<br>16.36)                | −0.49<br>(−0.72 to<br>−0.26)             |
| Croatia | G6PD<br>deficiency          | 3<br>(2 to 4)                           | 2<br>(1 to 2)                           | −0.47<br>(−0.52 to<br>−0.42)           | 61.5<br>(47.54 to<br>77.49)                | 37.49<br>(28.86 to<br>46.57)               | −0.63<br>(−1.09 to<br>−0.17)             |
| Croatia | G6PD trait                  | 3<br>(2 to 3)                           | 2<br>(2 to 2)                           | −0.35<br>(−0.35 to<br>−0.35)           | 56.8<br>(49.68 to<br>64.89)                | 42.87<br>(37.49 to<br>48.97)               | −0.53<br>(−0.76 to<br>−0.3)              |
| Cuba    | Inherited<br>anemias        | 32<br>(29 to 36)                        | 20<br>(18 to 23)                        | −0.37<br>(−0.39 to<br>−0.34)           | 297.17<br>(264.47 to<br>333.34)            | 179.56<br>(160.46 to<br>200.62)            | −1.27<br>(−1.56 to<br>−0.98)             |
| Cuba    | Thalassemi<br>as            | 0<br>(0 to 0)                           | 0<br>(0 to 0)                           | −0.01<br>(−0.42 to<br>1.19)            | 0.01<br>(0 to 0.01)                        | 0.01<br>(0 to 0.01)                        | 0.14<br>(−0.18 to<br>0.45)               |
| Cuba    | Thalassemi<br>as trait      | 0<br>(0 to 1)                           | 0<br>(0 to 0)                           | −0.28<br>(−0.42 to<br>0)               | 4.02<br>(2.95 to<br>5.41)                  | 2.77<br>(2.07 to<br>3.44)                  | −0.86<br>(−1.11 to<br>−0.6)              |
| Cuba    | Sickle<br>cell<br>disorders | 0<br>(0 to 0)                           | 0<br>(0 to 0)                           | 0.11<br>(−0.05 to<br>0.3)              | 1.14<br>(0.96 to<br>1.35)                  | 1.21<br>(0.92 to<br>1.55)                  | 0.62<br>(−0.04 to<br>1.29)               |
| Cuba    | Sickle<br>cell trait        | 8<br>(7 to 9)                           | 6<br>(5 to 7)                           | −0.25<br>(−0.31 to<br>−0.18)           | 72.28<br>(65.41 to<br>80.61)               | 52.03<br>(45 to<br>60.58)                  | −0.68<br>(−1.07 to<br>−0.3)              |
| Cuba    | G6PD<br>deficiency          | 7<br>(5 to 9)                           | 4<br>(3 to 5)                           | −0.41<br>(−0.44 to<br>−0.37)           | 64.96<br>(50.18 to<br>81.39)               | 36.71<br>(28.46 to<br>45.84)               | −1.51<br>(−1.77 to<br>−1.25)             |
| Cuba    | G6PD trait                  | 17<br>(15 to 19)                        | 10<br>(9 to 11)                         | −0.41<br>(−0.44 to<br>−0.38)           | 154.77<br>(137.83 to<br>172.56)            | 86.85<br>(77.42 to<br>96.24)               | −1.5<br>(−1.77 to<br>−1.24)              |
| Cyprus  | Inherited<br>anemias        | 5<br>(5 to 6)                           | 5<br>(5 to 6)                           | 0.05<br>(0.02 to<br>0.08)              | 658.64<br>(596.74 to<br>727.39)            | 408.55<br>(368.44 to<br>451.63)            | −1.23<br>(−1.9 to<br>−0.55)              |
| Cyprus  | Thalassemi<br>as            | 0<br>(0 to 0)                           | 0<br>(0 to 0)                           | 0.04<br>(−0.09 to<br>0.17)             | 4.42<br>(3.22 to<br>5.83)                  | 2.72<br>(1.96 to<br>3.64)                  | −1.43<br>(−1.77 to<br>−1.08)             |
| Cyprus  | Thalassemi<br>as trait      | 1<br>(1 to 2)                           | 1<br>(1 to 2)                           | 0.04<br>(−0.02 to<br>0.1)              | 182.59<br>(157.94 to<br>208.12)            | 112.81<br>(97.31 to<br>129.33)             | −1.43<br>(−1.78 to<br>−1.07)             |
| Cyprus  | Sickle<br>cell<br>disorders | 0<br>(0 to 0)                           | 0<br>(0 to 0)                           | 0<br>(−0.1 to<br>0.12)                 | 0.73<br>(0.52 to<br>0.99)                  | 0.43<br>(0.31 to<br>0.58)                  | −1.46<br>(−1.77 to<br>−1.15)             |



| <b>Regions</b>                                 | <b>Causes</b>               | <b>Cases in<br/>1990<br/>No.×103<br/>(95% UI)</b> | <b>Cases in<br/>2019<br/>No.×103<br/>(95% UI)</b> | <b>Change in<br/>absolute<br/>number<br/>(%)</b> | <b>Rates in<br/>1990 per<br/>100000<br/>(95% UI)</b> | <b>Rates in<br/>2019 per<br/>100000<br/>(95% UI)</b> | <b>EAPC<br/>from 1990<br/>and 2019<br/>(95%CI)</b> |
|------------------------------------------------|-----------------------------|---------------------------------------------------|---------------------------------------------------|--------------------------------------------------|------------------------------------------------------|------------------------------------------------------|----------------------------------------------------|
| Cyprus                                         | Sickle<br>cell trait        | 0<br>(0 to 0)                                     | 0<br>(0 to 0)                                     | -0.01<br>(-0.08 to<br>0.06)                      | 41.73<br>(33.9 to<br>50.44)                          | 24.37<br>(20.11 to<br>28.9)                          | -1.49<br>(-1.83 to<br>-1.13)                       |
| Cyprus                                         | G6PD<br>deficiency          | 1<br>(1 to 1)                                     | 1<br>(1 to 1)                                     | 0.08<br>(0.01 to<br>0.15)                        | 132.75<br>(102.77 to<br>164.65)                      | 84.66<br>(65.54 to<br>106.09)                        | -0.89<br>(-2.1 to<br>0.33)                         |
| Cyprus                                         | G6PD trait                  | 2<br>(2 to 3)                                     | 2<br>(2 to 3)                                     | 0.05<br>(0.02 to<br>0.08)                        | 296.41<br>(269.04 to<br>321.76)                      | 183.56<br>(166.65 to<br>199.63)                      | -1.2<br>(-1.96 to<br>-0.43)                        |
| Czechia                                        | Inherited<br>anemias        | 18<br>(16 to 20)                                  | 16<br>(14 to 18)                                  | -0.12<br>(-0.14 to<br>-0.1)                      | 175.82<br>(155.23 to<br>197.76)                      | 149.09<br>(131.13 to<br>168.97)                      | 0.08<br>(-0.34 to<br>0.51)                         |
| Czechia                                        | Thalassemi<br>as            | 0<br>(0 to 0)                                     | 0<br>(0 to 0)                                     | -0.48<br>(-0.54 to<br>-0.41)                     | 0.9<br>(0.59 to<br>1.42)                             | 0.45<br>(0.31 to<br>0.68)                            | -1.45<br>(-1.89 to<br>-1.01)                       |
| Czechia                                        | Thalassemi<br>as trait      | 2<br>(2 to 3)                                     | 2<br>(2 to 2)                                     | -0.11<br>(-0.17 to<br>-0.04)                     | 21.87<br>(18.08 to<br>26.54)                         | 18.89<br>(15.8 to<br>22.72)                          | 0.33<br>(-0.1 to<br>0.76)                          |
| Czechia                                        | Sickle<br>cell<br>disorders | 0<br>(0 to 0)                                     | 0<br>(0 to 0)                                     | -0.04<br>(-0.14 to<br>0.06)                      | 0.09<br>(0.06 to<br>0.11)                            | 0.08<br>(0.06 to<br>0.11)                            | 0.49<br>(0.1 to<br>0.88)                           |
| Czechia                                        | Sickle<br>cell trait        | 2<br>(2 to 2)                                     | 2<br>(2 to 2)                                     | -0.1<br>(-0.14 to<br>-0.06)                      | 19.96<br>(17.2 to<br>22.87)                          | 17.39<br>(14.89 to<br>20.09)                         | 0.35<br>(-0.07 to<br>0.76)                         |
| Czechia                                        | G6PD<br>deficiency          | 4<br>(3 to 6)                                     | 4<br>(3 to 5)                                     | -0.08<br>(-0.15 to<br>0)                         | 43.12<br>(33.36 to<br>53.47)                         | 38.39<br>(29.67 to<br>48.65)                         | -0.52<br>(-1.04 to<br>0)                           |
| Czechia                                        | G6PD trait                  | 9<br>(8 to 10)                                    | 8<br>(7 to 9)                                     | -0.15<br>(-0.15 to<br>-0.15)                     | 89.88<br>(79.3 to<br>100.74)                         | 73.89<br>(65.19 to<br>82.81)                         | 0.22<br>(-0.21 to<br>0.66)                         |
| Democratic<br>People's<br>Republic of<br>Korea | Inherited<br>anemias        | 164<br>(147 to<br>182)                            | 76<br>(68 to 85)                                  | -0.54<br>(-0.55 to<br>-0.52)                     | 779.55<br>(700.43 to<br>864.63)                      | 290.11<br>(260.77 to<br>323.05)                      | -3.78<br>(-3.94 to<br>-3.61)                       |
| Democratic<br>People's<br>Republic of<br>Korea | Thalassemi<br>as            | 1<br>(1 to 1)                                     | 0<br>(0 to 1)                                     | -0.54<br>(-0.6 to<br>-0.47)                      | 3.92<br>(2.87 to<br>5.27)                            | 1.45<br>(1.03 to<br>2.01)                            | -3.77<br>(-3.94 to<br>-3.6)                        |
| Democratic<br>People's<br>Republic of<br>Korea | Thalassemi<br>as trait      | 42<br>(35 to 50)                                  | 21<br>(18 to 26)                                  | -0.49<br>(-0.52 to<br>-0.45)                     | 198.87<br>(165.48 to<br>237.62)                      | 81.63<br>(68.26 to<br>97.9)                          | -3.43<br>(-3.6 to<br>-3.26)                        |
| Democratic                                     | Sickle                      | 0                                                 | 0                                                 | -0.5                                             | 0.11                                                 | 0.05                                                 | -3.21                                              |

| <b>Regions</b>                                 | <b>Causes</b>                | <b>Cases in<br/>1990<br/>No.×103<br/>(95% UI)</b> | <b>Cases in<br/>2019<br/>No.×103<br/>(95% UI)</b> | <b>Change in<br/>absolute<br/>number<br/>(%)</b> | <b>Rates in<br/>1990 per<br/>100000<br/>(95% UI)</b> | <b>Rates in<br/>2019 per<br/>100000<br/>(95% UI)</b> | <b>EAPC<br/>from 1990<br/>and 2019<br/>(95%CI)</b> |
|------------------------------------------------|------------------------------|---------------------------------------------------|---------------------------------------------------|--------------------------------------------------|------------------------------------------------------|------------------------------------------------------|----------------------------------------------------|
| People's<br>Republic of<br>Korea               | cell<br>disorders            | (0 to 0)                                          | (0 to 0)                                          | (−0.57 to<br>−0.43)                              | (0.08 to<br>0.16)                                    | (0.03 to<br>0.06)                                    | (−3.38 to<br>−3.03)                                |
| Democratic<br>People's<br>Republic of<br>Korea | Sickle<br>cell trait         | 8<br>(7 to 10)                                    | 4<br>(3 to 5)                                     | −0.53<br>(−0.56 to<br>−0.49)                     | 38.73<br>(32.54 to<br>46.24)                         | 14.72<br>(12.09 to<br>17.49)                         | −3.53<br>(−3.67 to<br>−3.39)                       |
| Democratic<br>People's<br>Republic of<br>Korea | G6PD<br>deficiency           | 28<br>(22 to 35)                                  | 13<br>(10 to 16)                                  | −0.53<br>(−0.56 to<br>−0.5)                      | 132.79<br>(102.64 to<br>165.4)                       | 49.62<br>(38.42 to<br>61.47)                         | −3.84<br>(−4.04 to<br>−3.63)                       |
| Democratic<br>People's<br>Republic of<br>Korea | G6PD trait                   | 85<br>(77 to 94)                                  | 37<br>(33 to 41)                                  | −0.56<br>(−0.58 to<br>−0.55)                     | 405.13<br>(363.97 to<br>444.56)                      | 142.65<br>(127.39 to<br>156.98)                      | −3.97<br>(−4.13 to<br>−3.8)                        |
| Democratic<br>Republic of<br>the Congo         | <b>Inherited<br/>anemias</b> | 1086<br>(986 to<br>1188)                          | 1754<br>(1599 to<br>1923)                         | 0.61<br>(0.56 to<br>0.68)                        | 2815.29<br>(2555.37 to<br>3077.74)                   | 2001.1<br>(1823.95 to<br>2193.21)                    | −1.1<br>(−1.25 to<br>−0.94)                        |
| Democratic<br>Republic of<br>the Congo         | Thalassemi<br>as             | 0<br>(0 to 0)                                     | 0<br>(0 to 0)                                     | 2.15<br>(1.75 to<br>2.74)                        | 0.11<br>(0.07 to<br>0.17)                            | 0.16<br>(0.09 to<br>0.24)                            | 1.03<br>(0.82 to<br>1.24)                          |
| Democratic<br>Republic of<br>the Congo         | Thalassemi<br>as trait       | 15<br>(13 to 18)                                  | 30<br>(24 to 35)                                  | 0.97<br>(0.84 to<br>1.13)                        | 39.11<br>(32.58 to<br>46.51)                         | 33.95<br>(27.94 to<br>40.43)                         | −0.46<br>(−0.61 to<br>−0.3)                        |
| Democratic<br>Republic of<br>the Congo         | Sickle<br>cell<br>disorders  | 30<br>(24 to 38)                                  | 55<br>(44 to 69)                                  | 0.8<br>(0.57 to<br>1.1)                          | 78.92<br>(61.65 to<br>97.92)                         | 62.68<br>(50.21 to<br>78.77)                         | −0.74<br>(−0.96 to<br>−0.52)                       |
| Democratic<br>Republic of<br>the Congo         | Sickle<br>cell trait         | 405<br>(362 to<br>447)                            | 673<br>(610 to<br>744)                            | 0.66<br>(0.56 to<br>0.78)                        | 1049.97<br>(937.47 to<br>1159.48)                    | 767.53<br>(696.35 to<br>848.88)                      | −1<br>(−1.17 to<br>−0.82)                          |
| Democratic<br>Republic of<br>the Congo         | G6PD<br>deficiency           | 260<br>(200 to<br>322)                            | 411<br>(318 to<br>514)                            | 0.58<br>(0.48 to<br>0.72)                        | 672.49<br>(519.31 to<br>835.4)                       | 468.64<br>(362.36 to<br>586.07)                      | −1.22<br>(−1.36 to<br>−1.08)                       |
| Democratic<br>Republic of<br>the Congo         | G6PD trait                   | 376<br>(347 to<br>402)                            | 586<br>(540 to<br>626)                            | 0.56<br>(0.52 to<br>0.6)                         | 974.69<br>(899.69 to<br>1041.09)                     | 668.14<br>(615.43 to<br>714.13)                      | −1.18<br>(−1.34 to<br>−1.03)                       |
| <b>Denmark</b>                                 | <b>Inherited<br/>anemias</b> | 12<br>(10 to 13)                                  | 11<br>(10 to 12)                                  | −0.04<br>(−0.07 to<br>−0.02)                     | 224.44<br>(200.96 to<br>248.67)                      | 190.6<br>(170.94 to<br>212.31)                       | −1.03<br>(−1.21 to<br>−0.85)                       |
| <b>Denmark</b>                                 | Thalassemi<br>as             | 0<br>(0 to 0)                                     | 0<br>(0 to 0)                                     | −0.08<br>(−0.2 to<br>0.05)                       | 0.16<br>(0.11 to<br>0.21)                            | 0.13<br>(0.09 to<br>0.17)                            | −2<br>(−2.89 to<br>−1.1)                           |
| <b>Denmark</b>                                 | Thalassemi                   | 1                                                 | 1                                                 | 0                                                | 19.85                                                | 17.51                                                | −1.12                                              |

| Regions  | Causes                      | Cases in<br>1990<br>No.×103<br>(95% UI) | Cases in<br>2019<br>No.×103<br>(95% UI) | Change in<br>absolute<br>number<br>(%) | Rates in<br>1990 per<br>100000<br>(95% UI) | Rates in<br>2019 per<br>100000<br>(95% UI) | EAPC<br>from 1990<br>and 2019<br>(95%CI) |
|----------|-----------------------------|-----------------------------------------|-----------------------------------------|----------------------------------------|--------------------------------------------|--------------------------------------------|------------------------------------------|
|          | as trait                    | (1 to 1)                                | (1 to 1)                                | (−0.07 to<br>0.06)                     | (17.16 to<br>22.55)                        | (15.28 to<br>20.11)                        | (−1.44 to<br>−0.8)                       |
| Denmark  | Sickle<br>cell<br>disorders | 0<br>(0 to 0)                           | 0<br>(0 to 0)                           | −0.22<br>(−0.31 to<br>−0.12)           | 0.2<br>(0.14 to<br>0.29)                   | 0.14<br>(0.1 to<br>0.19)                   | −1.6<br>(−2.05 to<br>−1.14)              |
| Denmark  | Sickle<br>cell trait        | 1<br>(1 to 2)                           | 1<br>(1 to 2)                           | −0.15<br>(−0.2 to<br>−0.09)            | 28.67<br>(23.14 to<br>34.98)               | 21.69<br>(17.91 to<br>26.11)               | −1.35<br>(−1.66 to<br>−1.05)             |
| Denmark  | G6PD<br>deficiency          | 2<br>(1 to 2)                           | 2<br>(1 to 2)                           | 0.02<br>(−0.04 to<br>0.08)             | 33.75<br>(25.94 to<br>42)                  | 30.52<br>(23.55 to<br>38.79)               | −0.83<br>(−0.98 to<br>−0.68)             |
| Denmark  | G6PD trait                  | 7<br>(7 to 8)                           | 7<br>(6 to 8)                           | −0.04<br>(−0.07 to<br>0)               | 141.8<br>(127.01 to<br>156.2)              | 120.62<br>(108.25 to<br>133.2)             | −1<br>(−1.15 to<br>−0.84)                |
| Djibouti | Inherited<br>anemias        | 7<br>(6 to 8)                           | 10<br>(9 to 12)                         | 0.46<br>(0.43 to<br>0.48)              | 1473.52<br>(1294.67 to<br>1650.57)         | 869.24<br>(768.56 to<br>971.13)            | −1.64<br>(−1.98 to<br>−1.29)             |
| Djibouti | Thalassemi<br>as            | 0<br>(0 to 0)                           | 0<br>(0 to 0)                           | 2.55<br>(2.01 to<br>3.4)               | 0.09<br>(0.05 to<br>0.13)                  | 0.13<br>(0.07 to<br>0.19)                  | 1.17<br>(0.86 to<br>1.48)                |
| Djibouti | Thalassemi<br>as trait      | 0<br>(0 to 0)                           | 0<br>(0 to 0)                           | 1.21<br>(1.02 to<br>1.48)              | 26.1<br>(20.58 to<br>32.09)                | 23.26<br>(18.43 to<br>28.43)               | −0.31<br>(−0.57 to<br>−0.05)             |
| Djibouti | Sickle<br>cell<br>disorders | 0<br>(0 to 0)                           | 0<br>(0 to 0)                           | 0.55<br>(0.4 to<br>0.69)               | 1.2<br>(0.88 to<br>1.64)                   | 0.75<br>(0.54 to<br>1.03)                  | −2.75<br>(−3.31 to<br>−2.19)             |
| Djibouti | Sickle<br>cell trait        | 1<br>(1 to 1)                           | 1<br>(1 to 1)                           | 0.57<br>(0.5 to<br>0.64)               | 142.39<br>(121.97 to<br>167.7)             | 90.44<br>(76.93 to<br>106.47)              | −2.03<br>(−2.38 to<br>−1.68)             |
| Djibouti | G6PD<br>deficiency          | 2<br>(2 to 3)                           | 3<br>(2 to 4)                           | 0.3<br>(0.23 to<br>0.37)               | 465.8<br>(358.94 to<br>577.42)             | 245.09<br>(188.28 to<br>307.7)             | −1.96<br>(−2.43 to<br>−1.49)             |
| Djibouti | G6PD trait                  | 4<br>(4 to 4)                           | 6<br>(6 to 7)                           | 0.51<br>(0.5 to<br>0.51)               | 837.94<br>(767.87 to<br>899.87)            | 509.57<br>(465.66 to<br>549.41)            | −1.45<br>(−1.76 to<br>−1.15)             |
| Dominica | Inherited<br>anemias        | 0<br>(0 to 0)                           | 0<br>(0 to 0)                           | −0.48<br>(−0.5 to<br>−0.45)            | 583.68<br>(515.83 to<br>660.33)            | 328.73<br>(289.57 to<br>372.25)            | −2.29<br>(−2.39 to<br>−2.18)             |
| Dominica | Thalassemi<br>as            | 0<br>(0 to 0)                           | 0<br>(0 to 0)                           | −0.2<br>(−0.52 to<br>0.55)             | 0.01<br>(0.01 to<br>0.02)                  | 0.01<br>(0.01 to<br>0.01)                  | −0.9<br>(−1.13 to<br>−0.67)              |
| Dominica | Thalassemi<br>as trait      | 0<br>(0 to 0)                           | 0<br>(0 to 0)                           | −0.43<br>(−0.52 to                     | 8.62<br>(6.69 to                           | 5.3<br>(4.15 to                            | −1.97<br>(−2.07 to                       |

| Regions               | Causes                      | Cases in<br>1990<br>No.×103<br>(95% UI) | Cases in<br>2019<br>No.×103<br>(95% UI) | Change in<br>absolute<br>number<br>(%) | Rates in<br>1990 per<br>100000<br>(95% UI) | Rates in<br>2019 per<br>100000<br>(95% UI) | EAPC<br>from 1990<br>and 2019<br>(95%CI) |
|-----------------------|-----------------------------|-----------------------------------------|-----------------------------------------|----------------------------------------|--------------------------------------------|--------------------------------------------|------------------------------------------|
|                       |                             |                                         |                                         | -0.29)                                 | 10.96)                                     | 6.43)                                      | -1.87)                                   |
| Dominica              | Sickle<br>cell<br>disorders | 0<br>(0 to 0)                           | 0<br>(0 to 0)                           | -0.28<br>(-0.38 to<br>-0.16)           | 5.03<br>(3.74 to<br>6.6)                   | 3.88<br>(2.74 to<br>5.22)                  | -1.49<br>(-1.77 to<br>-1.21)             |
| Dominica              | Sickle<br>cell trait        | 0<br>(0 to 0)                           | 0<br>(0 to 0)                           | -0.39<br>(-0.43 to<br>-0.33)           | 165.52<br>(140.09 to<br>192.5)             | 109.35<br>(90.64 to<br>130.15)             | -1.89<br>(-2.07 to<br>-1.7)              |
| Dominica              | G6PD<br>deficiency          | 0<br>(0 to 0)                           | 0<br>(0 to 0)                           | -0.52<br>(-0.57 to<br>-0.47)           | 184.68<br>(142.66 to<br>229.12)            | 95.4<br>(73.42 to<br>117.54)               | -2.51<br>(-2.62 to<br>-2.41)             |
| Dominica              | G6PD trait                  | 0<br>(0 to 0)                           | 0<br>(0 to 0)                           | -0.52<br>(-0.53 to<br>-0.49)           | 219.83<br>(196.42 to<br>242.27)            | 114.8<br>(102.38 to<br>128.14)             | -2.48<br>(-2.59 to<br>-2.36)             |
| Dominican<br>Republic | Inherited<br>anemias        | 72<br>(64 to 80)                        | 68<br>(61 to 76)                        | -0.05<br>(-0.07 to<br>-0.02)           | 994.2<br>(888.68 to<br>1109.16)            | 627.57<br>(563.7 to<br>697.91)             | -1.72<br>(-1.9 to<br>-1.53)              |
| Dominican<br>Republic | Thalassemi<br>as            | 0<br>(0 to 0)                           | 0<br>(0 to 0)                           | 0.15<br>(-0.14 to<br>0.56)             | 0.05<br>(0.04 to<br>0.07)                  | 0.04<br>(0.03 to<br>0.05)                  | -1.09<br>(-1.19 to<br>-0.99)             |
| Dominican<br>Republic | Thalassemi<br>as trait      | 2<br>(2 to 2)                           | 2<br>(2 to 2)                           | 0.01<br>(-0.11 to<br>0.13)             | 28.87<br>(24.28 to<br>34.04)               | 19.25<br>(16.32 to<br>22.65)               | -1.53<br>(-1.66 to<br>-1.39)             |
| Dominican<br>Republic | Sickle<br>cell<br>disorders | 1<br>(1 to 1)                           | 1<br>(1 to 1)                           | -0.01<br>(-0.08 to<br>0.08)            | 15.98<br>(13.25 to<br>18.95)               | 10.51<br>(8.84 to<br>12.44)                | -1.61<br>(-1.85 to<br>-1.37)             |
| Dominican<br>Republic | Sickle<br>cell trait        | 26<br>(23 to 29)                        | 25<br>(23 to 28)                        | -0.03<br>(-0.07 to<br>0.03)            | 360.94<br>(322.16 to<br>399.98)            | 232.42<br>(209.57 to<br>256.52)            | -1.66<br>(-1.86 to<br>-1.45)             |
| Dominican<br>Republic | G6PD<br>deficiency          | 19<br>(15 to 24)                        | 18<br>(14 to 22)                        | -0.07<br>(-0.07 to<br>-0.06)           | 267.4<br>(205.74 to<br>332.26)             | 165.46<br>(127.32 to<br>205.65)            | -1.77<br>(-1.93 to<br>-1.61)             |
| Dominican<br>Republic | G6PD trait                  | 23<br>(21 to 26)                        | 22<br>(19 to 24)                        | -0.06<br>(-0.1 to<br>-0.02)            | 320.97<br>(284.97 to<br>356.46)            | 199.89<br>(178.05 to<br>221.77)            | -1.76<br>(-1.93 to<br>-1.59)             |
| Ecuador               | Inherited<br>anemias        | 46<br>(42 to 51)                        | 63<br>(56 to 71)                        | 0.35<br>(0.31 to<br>0.41)              | 462.39<br>(416.65 to<br>510.78)            | 356.85<br>(316.75 to<br>401.21)            | -1.35<br>(-1.48 to<br>-1.23)             |
| Ecuador               | Thalassemi<br>as            | 0<br>(0 to 0)                           | 0<br>(0 to 0)                           | 0.64<br>(0.26 to<br>1.13)              | 0.05<br>(0.03 to<br>0.06)                  | 0.04<br>(0.03 to<br>0.06)                  | -0.19<br>(-0.34 to<br>-0.05)             |
| Ecuador               | Thalassemi<br>as trait      | 2<br>(2 to 3)                           | 3<br>(3 to 4)                           | 0.34<br>(0.2 to<br>0.51)               | 24.06<br>(20.83 to<br>27.76)               | 18.42<br>(15.92 to<br>21.13)               | -0.96<br>(-1.02 to<br>-0.9)              |

| <b>Regions</b> | <b>Causes</b>         | <b>Cases in<br/>1990<br/>No.×103<br/>(95% UI)</b> | <b>Cases in<br/>2019<br/>No.×103<br/>(95% UI)</b> | <b>Change in<br/>absolute<br/>number<br/>(%)</b> | <b>Rates in<br/>1990 per<br/>100000<br/>(95% UI)</b> | <b>Rates in<br/>2019 per<br/>100000<br/>(95% UI)</b> | <b>EAPC<br/>from 1990<br/>and 2019<br/>(95%CI)</b> |
|----------------|-----------------------|---------------------------------------------------|---------------------------------------------------|--------------------------------------------------|------------------------------------------------------|------------------------------------------------------|----------------------------------------------------|
| Ecuador        | Sickle cell disorders | 0<br>(0 to 0)                                     | 0<br>(0 to 0)                                     | 0.91<br>(0.71 to 1.12)                           | 0.13<br>(0.11 to 0.16)                               | 0.14<br>(0.11 to 0.17)                               | 0.19<br>(0.1 to 0.28)                              |
| Ecuador        | Sickle cell trait     | 4<br>(3 to 4)                                     | 6<br>(5 to 6)                                     | 0.52<br>(0.44 to 0.59)                           | 37.27<br>(33.32 to 41.82)                            | 32.27<br>(28.89 to 36.11)                            | -0.58<br>(-0.63 to -0.54)                          |
| Ecuador        | G6PD deficiency       | 5<br>(4 to 6)                                     | 14<br>(11 to 17)                                  | 1.9<br>(1.7 to 2.13)                             | 47.46<br>(36.64 to 60.35)                            | 78.54<br>(61.71 to 98.21)                            | -0.75<br>(-1.46 to -0.04)                          |
| Ecuador        | G6PD trait            | 35<br>(32 to 39)                                  | 40<br>(36 to 44)                                  | 0.13<br>(0.09 to 0.18)                           | 353.44<br>(317.29 to 391.23)                         | 227.43<br>(204.37 to 251.44)                         | -1.6<br>(-1.65 to -1.55)                           |
| Egypt          | Inherited anemias     | 648<br>(605 to 698)                               | 686<br>(633 to 742)                               | 0.06<br>(0.03 to 0.09)                           | 1164.09<br>(1086.77 to 1253.66)                      | 692.15<br>(639.2 to 749.44)                          | -1.22<br>(-1.42 to -1.02)                          |
| Egypt          | Thalassemias          | 1<br>(1 to 1)                                     | 1<br>(1 to 1)                                     | 0.16<br>(0.05 to 0.28)                           | 1.48<br>(1.17 to 1.93)                               | 0.97<br>(0.76 to 1.21)                               | -1.07<br>(-1.23 to -0.91)                          |
| Egypt          | Thalassemias trait    | 86<br>(77 to 97)                                  | 98<br>(87 to 110)                                 | 0.14<br>(0.09 to 0.19)                           | 154.22<br>(138.31 to 174.66)                         | 98.66<br>(88.17 to 110.7)                            | -1.13<br>(-1.28 to -0.97)                          |
| Egypt          | Sickle cell disorders | 3<br>(3 to 4)                                     | 3<br>(3 to 4)                                     | 0.07<br>(-0.01 to 0.15)                          | 5.7<br>(4.74 to 6.9)                                 | 3.42<br>(2.88 to 4.13)                               | -1.31<br>(-1.46 to -1.16)                          |
| Egypt          | Sickle cell trait     | 150<br>(138 to 165)                               | 161<br>(148 to 177)                               | 0.07<br>(0.04 to 0.11)                           | 269.75<br>(247.13 to 296.28)                         | 162.93<br>(149.59 to 178.58)                         | -1.3<br>(-1.45 to -1.15)                           |
| Egypt          | G6PD deficiency       | 96<br>(81 to 113)                                 | 81<br>(62 to 100)                                 | -0.16<br>(-0.27 to -0.07)                        | 173.03<br>(145.38 to 202.31)                         | 81.59<br>(62.65 to 101.21)                           | -1.13<br>(-1.68 to -0.58)                          |
| Egypt          | G6PD trait            | 312<br>(284 to 339)                               | 341<br>(310 to 370)                               | 0.09<br>(0.07 to 0.13)                           | 559.92<br>(509.67 to 608.07)                         | 344.59<br>(312.8 to 373.19)                          | -1.23<br>(-1.38 to -1.08)                          |
| El Salvador    | Inherited anemias     | 29<br>(26 to 33)                                  | 17<br>(15 to 19)                                  | -0.41<br>(-0.43 to -0.39)                        | 558.82<br>(491.77 to 624.1)                          | 277.4<br>(244.06 to 310.55)                          | -2.65<br>(-2.85 to -2.46)                          |
| El Salvador    | Thalassemias          | 0<br>(0 to 0)                                     | 0<br>(0 to 0)                                     | 0.16<br>(-0.32 to 1.39)                          | 0.01<br>(0.01 to 0.02)                               | 0.01<br>(0.01 to 0.02)                               | -0.36<br>(-0.56 to -0.15)                          |
| El Salvador    | Thalassemias trait    | 0<br>(0 to 1)                                     | 0<br>(0 to 0)                                     | -0.15<br>(-0.32 to 0.17)                         | 8.46<br>(6.09 to 11.46)                              | 6.04<br>(4.49 to 7.74)                               | -1.41<br>(-1.62 to -1.21)                          |
| El Salvador    | Sickle                | 0                                                 | 0                                                 | -0.33                                            | 0.07                                                 | 0.04                                                 | -2.19                                              |

| Regions           | Causes                | Cases in 1990<br>No.×103<br>(95% UI) | Cases in 2019<br>No.×103<br>(95% UI) | Change in absolute number<br>(%) | Rates in 1990 per 100000<br>(95% UI) | Rates in 2019 per 100000<br>(95% UI) | EAPC from 1990 and 2019<br>(95%CI) |
|-------------------|-----------------------|--------------------------------------|--------------------------------------|----------------------------------|--------------------------------------|--------------------------------------|------------------------------------|
|                   | cell disorders        | (0 to 0)                             | (0 to 0)                             | (−0.41 to −0.24)                 | (0.03 to 0.11)                       | (0.02 to 0.06)                       | (−2.48 to −1.91)                   |
| El Salvador       | Sickle cell trait     | 0<br>(0 to 0)                        | 0<br>(0 to 0)                        | −0.34<br>(−0.45 to −0.32)        | 3.48<br>(1.41 to 6.08)               | 1.93<br>(0.8 to 3.07)                | −2.12<br>(−2.37 to −1.87)          |
| El Salvador       | G6PD deficiency       | 6<br>(5 to 7)                        | 3<br>(2 to 4)                        | −0.49<br>(−0.51 to −0.45)        | 111.49<br>(85.92 to 137.92)          | 47.87<br>(36.91 to 60.33)            | −3.1<br>(−3.27 to −2.92)           |
| El Salvador       | G6PD trait            | 23<br>(21 to 25)                     | 14<br>(12 to 15)                     | −0.4<br>(−0.42 to −0.37)         | 435.31<br>(392.4 to 475.44)          | 221.51<br>(198.94 to 242.49)         | −2.58<br>(−2.8 to −2.36)           |
| Equatorial Guinea | Inherited anemias     | 11<br>(10 to 12)                     | 19<br>(18 to 20)                     | 0.65<br>(0.55 to 0.76)           | 2640.52<br>(2426.37 to 2869.86)      | 1322.2<br>(1247.2 to 1406.4)         | −2.47<br>(−2.63 to −2.31)          |
| Equatorial Guinea | Thalassemias          | 0<br>(0 to 0)                        | 0<br>(0 to 0)                        | 2.4<br>(1.88 to 3)               | 0.13<br>(0.08 to 0.18)               | 0.13<br>(0.07 to 0.2)                | −0.34<br>(−0.58 to −0.09)          |
| Equatorial Guinea | Thalassemias trait    | 0<br>(0 to 0)                        | 0<br>(0 to 0)                        | 1.08<br>(0.85 to 1.25)           | 42.94<br>(35.86 to 50.85)            | 27.06<br>(22.03 to 31.98)            | −1.87<br>(−2.04 to −1.69)          |
| Equatorial Guinea | Sickle cell disorders | 1<br>(0 to 1)                        | 1<br>(1 to 1)                        | 0.65<br>(0.53 to 0.79)           | 126.34<br>(100.42 to 156.53)         | 63.25<br>(50.87 to 78.56)            | −2.26<br>(−2.45 to −2.07)          |
| Equatorial Guinea | Sickle cell trait     | 5<br>(4 to 5)                        | 8<br>(7 to 9)                        | 0.64<br>(0.58 to 0.72)           | 1099.69<br>(987.53 to 1237.01)       | 547.22<br>(488.85 to 612.39)         | −2.38<br>(−2.55 to −2.22)          |
| Equatorial Guinea | G6PD deficiency       | 2<br>(1 to 2)                        | 3<br>(2 to 3)                        | 0.62<br>(0.31 to 1.08)           | 375.44<br>(289.39 to 472.07)         | 184.3<br>(170.53 to 198.59)          | −2.66<br>(−2.84 to −2.47)          |
| Equatorial Guinea | G6PD trait            | 4<br>(4 to 5)                        | 7<br>(7 to 7)                        | 0.66<br>(0.55 to 0.79)           | 995.98<br>(913.7 to 1076.37)         | 500.25<br>(485.34 to 515.57)         | −2.55<br>(−2.72 to −2.38)          |
| Eritrea           | Inherited anemias     | 44<br>(39 to 50)                     | 60<br>(53 to 66)                     | 0.34<br>(0.31 to 0.38)           | 1480.77<br>(1305.66 to 1658.81)      | 889.52<br>(792.39 to 989.47)         | −1.77<br>(−1.93 to −1.61)          |
| Eritrea           | Thalassemias          | 0<br>(0 to 0)                        | 0<br>(0 to 0)                        | 2.29<br>(1.81 to 3.03)           | 0.09<br>(0.05 to 0.13)               | 0.13<br>(0.07 to 0.2)                | 0.96<br>(0.74 to 1.19)             |
| Eritrea           | Thalassemias trait    | 1<br>(1 to 1)                        | 2<br>(1 to 2)                        | 1.03<br>(0.87 to 1.28)           | 26.11<br>(20.72 to 31.93)            | 23.72<br>(18.8 to 28.97)             | −0.52<br>(−0.64 to −0.4)           |
| Eritrea           | Sickle cell           | 0<br>(0 to 0)                        | 0<br>(0 to 0)                        | 0.47<br>(0.33 to                 | 1.59<br>(1.13 to                     | 1.04<br>(0.74 to                     | −1.5<br>(−1.57 to                  |

| Regions  | Causes                      | Cases in<br>1990<br>No.×103<br>(95% UI) | Cases in<br>2019<br>No.×103<br>(95% UI) | Change in<br>absolute<br>number<br>(%) | Rates in<br>1990 per<br>100000<br>(95% UI) | Rates in<br>2019 per<br>100000<br>(95% UI) | EAPC<br>from 1990<br>and 2019<br>(95%CI) |
|----------|-----------------------------|-----------------------------------------|-----------------------------------------|----------------------------------------|--------------------------------------------|--------------------------------------------|------------------------------------------|
|          | disorders                   |                                         |                                         | 0.62)                                  | 2.24)                                      | 1.44)                                      | -1.43)                                   |
| Eritrea  | Sickle<br>cell trait        | 5<br>(4 to 6)                           | 7<br>(6 to 8)                           | 0.47<br>(0.39 to<br>0.54)              | 163.04<br>(136.92 to<br>194.52)            | 106.86<br>(89.52 to<br>126.45)             | -1.5<br>(-1.57 to<br>-1.43)              |
| Eritrea  | G6PD<br>deficiency          | 14<br>(11 to 17)                        | 16<br>(13 to 21)                        | 0.19<br>(0.12 to<br>0.26)              | 456.52<br>(351.39 to<br>567.72)            | 242.97<br>(188.06 to<br>305.85)            | -2.19<br>(-2.48 to<br>-1.9)              |
| Eritrea  | G6PD trait                  | 25<br>(23 to 27)                        | 35<br>(32 to 37)                        | 0.38<br>(0.34 to<br>0.42)              | 833.42<br>(762.18 to<br>897.05)            | 514.8<br>(470.86 to<br>555.58)             | -1.66<br>(-1.79 to<br>-1.54)             |
| Estonia  | Inherited<br>anemias        | 3<br>(2 to 3)                           | 2<br>(1 to 2)                           | -0.36<br>(-0.37 to<br>-0.35)           | 165.66<br>(147.15 to<br>185.66)            | 126.82<br>(112.47 to<br>142.34)            | 0.21<br>(-0.22 to<br>0.65)               |
| Estonia  | Thalassemi<br>as            | 0<br>(0 to 0)                           | 0<br>(0 to 0)                           | -0.57<br>(-0.62 to<br>-0.5)            | 0.66<br>(0.45 to 1)                        | 0.34<br>(0.24 to<br>0.48)                  | -1.08<br>(-1.52 to<br>-0.64)             |
| Estonia  | Thalassemi<br>as trait      | 0<br>(0 to 1)                           | 0<br>(0 to 0)                           | -0.35<br>(-0.39 to<br>-0.3)            | 31.52<br>(26.08 to<br>38.14)               | 24.49<br>(20.44 to<br>29.8)                | 0.27<br>(-0.16 to<br>0.69)               |
| Estonia  | Sickle<br>cell<br>disorders | 0<br>(0 to 0)                           | 0<br>(0 to 0)                           | -0.34<br>(-0.45 to<br>-0.19)           | 0.01<br>(0.01 to<br>0.01)                  | 0.01<br>(0 to 0.01)                        | 0.28<br>(-0.14 to<br>0.71)               |
| Estonia  | Sickle<br>cell trait        | 0<br>(0 to 0)                           | 0<br>(0 to 0)                           | -0.36<br>(-0.42 to<br>-0.28)           | 6.26<br>(5.07 to<br>7.74)                  | 4.81<br>(3.89 to<br>5.92)                  | 0.26<br>(-0.17 to<br>0.69)               |
| Estonia  | G6PD<br>deficiency          | 0<br>(0 to 1)                           | 0<br>(0 to 0)                           | -0.32<br>(-0.32 to<br>-0.32)           | 25.95<br>(19.87 to<br>32.31)               | 20.99<br>(16.07 to<br>26.13)               | 0.1<br>(-0.35 to<br>0.55)                |
| Estonia  | G6PD trait                  | 2<br>(1 to 2)                           | 1<br>(1 to 1)                           | -0.37<br>(-0.37 to<br>-0.37)           | 101.27<br>(90.12 to<br>113.15)             | 76.17<br>(67.79 to<br>85.11)               | 0.23<br>(-0.21 to<br>0.68)               |
| Eswatini | Inherited<br>anemias        | 9<br>(8 to 10)                          | 8<br>(7 to 9)                           | -0.1<br>(-0.12 to<br>-0.07)            | 1140.83<br>(997.98 to<br>1294.1)           | 725.27<br>(636.76 to<br>819.29)            | -1.4<br>(-1.52 to<br>-1.28)              |
| Eswatini | Thalassemi<br>as            | 0<br>(0 to 0)                           | 0<br>(0 to 0)                           | 0.96<br>(0.69 to<br>1.3)               | 0.09<br>(0.06 to<br>0.13)                  | 0.12<br>(0.07 to<br>0.19)                  | 1.01<br>(0.85 to<br>1.16)                |
| Eswatini | Thalassemi<br>as trait      | 0<br>(0 to 0)                           | 0<br>(0 to 0)                           | 0.2<br>(0.1 to<br>0.31)                | 31.03<br>(25.78 to<br>37.1)                | 26.22<br>(21.51 to<br>31.13)               | -0.53<br>(-0.61 to<br>-0.45)             |
| Eswatini | Sickle<br>cell<br>disorders | 0<br>(0 to 0)                           | 0<br>(0 to 0)                           | -0.06<br>(-0.13 to<br>0.01)            | 0.15<br>(0.1 to<br>0.22)                   | 0.1<br>(0.07 to<br>0.15)                   | -1.31<br>(-1.39 to<br>-1.23)             |

| <b>Regions</b> | <b>Causes</b>                | <b>Cases in<br/>1990<br/>No.×103<br/>(95% UI)</b> | <b>Cases in<br/>2019<br/>No.×103<br/>(95% UI)</b> | <b>Change in<br/>absolute<br/>number<br/>(%)</b> | <b>Rates in<br/>1990 per<br/>100000<br/>(95% UI)</b> | <b>Rates in<br/>2019 per<br/>100000<br/>(95% UI)</b> | <b>EAPC<br/>from 1990<br/>and 2019<br/>(95%CI)</b> |
|----------------|------------------------------|---------------------------------------------------|---------------------------------------------------|--------------------------------------------------|------------------------------------------------------|------------------------------------------------------|----------------------------------------------------|
| Eswatini       | Sickle<br>cell trait         | 0<br>(0 to 0)                                     | 0<br>(0 to 0)                                     | -0.06<br>(-0.1 to<br>-0.02)                      | 41.34<br>(32.16 to<br>53.03)                         | 27.31<br>(21.34 to<br>34.81)                         | -1.31<br>(-1.39 to<br>-1.23)                       |
| Eswatini       | G6PD<br>deficiency           | 3<br>(2 to 4)                                     | 3<br>(2 to 3)                                     | -0.14<br>(-0.18 to<br>-0.09)                     | 363.3<br>(280.83 to<br>456.72)                       | 221.76<br>(171.2 to<br>276.15)                       | -1.55<br>(-1.7 to<br>-1.39)                        |
| Eswatini       | G6PD trait                   | 6<br>(5 to 6)                                     | 5<br>(5 to 6)                                     | -0.1<br>(-0.12 to<br>-0.06)                      | 704.91<br>(644.13 to<br>761.16)                      | 449.76<br>(410.34 to<br>487.11)                      | -1.37<br>(-1.48 to<br>-1.27)                       |
| Ethiopia       | <b>Inherited<br/>anemias</b> | 786<br>(762 to<br>810)                            | 1067<br>(1038 to<br>1100)                         | 0.36<br>(0.35 to<br>0.37)                        | 1528.58<br>(1483.7 to<br>1576.91)                    | 992.13<br>(964.53 to<br>1022.7)                      | -1.36<br>(-1.46 to<br>-1.26)                       |
| Ethiopia       | Thalassemi<br>as             | 0<br>(0 to 1)                                     | 1<br>(1 to 1)                                     | 0.65<br>(0.51 to<br>0.83)                        | 0.95<br>(0.63 to<br>1.43)                            | 0.75<br>(0.51 to<br>1.06)                            | -0.94<br>(-1 to<br>-0.87)                          |
| Ethiopia       | Thalassemi<br>as trait       | 75<br>(62 to 91)                                  | 119<br>(99 to 142)                                | 0.59<br>(0.53 to<br>0.64)                        | 145.96<br>(120.41 to<br>177.2)                       | 110.59<br>(92.15 to<br>131.65)                       | -1.05<br>(-1.11 to<br>-0.99)                       |
| Ethiopia       | Sickle<br>cell<br>disorders  | 0<br>(0 to 0)                                     | 0<br>(0 to 0)                                     | 0.5<br>(0.45 to<br>0.58)                         | 0.42<br>(0.28 to<br>0.63)                            | 0.3<br>(0.2 to<br>0.45)                              | -1.21<br>(-1.27 to<br>-1.15)                       |
| Ethiopia       | Sickle<br>cell trait         | 42<br>(33 to 53)                                  | 63<br>(50 to 80)                                  | 0.5<br>(0.46 to<br>0.53)                         | 81.84<br>(64.37 to<br>102.75)                        | 58.49<br>(46.1 to<br>74.38)                          | -1.22<br>(-1.27 to<br>-1.16)                       |
| Ethiopia       | G6PD<br>deficiency           | 209<br>(199 to<br>218)                            | 199<br>(190 to<br>208)                            | -0.05<br>(-0.06 to<br>-0.03)                     | 406.27<br>(387.46 to<br>424.1)                       | 185.32<br>(176.61 to<br>193.46)                      | -1.93<br>(-2.24 to<br>-1.63)                       |
| Ethiopia       | G6PD trait                   | 459<br>(452 to<br>465)                            | 685<br>(674 to<br>695)                            | 0.49<br>(0.49 to<br>0.5)                         | 893.14<br>(879.68 to<br>905.08)                      | 636.69<br>(626.79 to<br>645.81)                      | -1.19<br>(-1.24 to<br>-1.14)                       |
| Fiji           | <b>Inherited<br/>anemias</b> | 4<br>(3 to 4)                                     | 4<br>(3 to 4)                                     | 0.03<br>(0 to 0.06)                              | 474.01<br>(425.64 to<br>526.15)                      | 408.34<br>(367.41 to<br>451.61)                      | -0.14<br>(-0.33 to<br>0.05)                        |
| Fiji           | Thalassemi<br>as             | 0<br>(0 to 0)                                     | 0<br>(0 to 0)                                     | -0.15<br>(-0.27 to<br>-0.01)                     | 2.85<br>(1.57 to<br>4.24)                            | 2.03<br>(1.13 to<br>3.08)                            | 0.28<br>(-0.73 to<br>1.31)                         |
| Fiji           | Thalassemi<br>as trait       | 1<br>(0 to 1)                                     | 1<br>(0 to 1)                                     | -0.09<br>(-0.15 to<br>-0.03)                     | 80.44<br>(61.3 to<br>97.75)                          | 60.92<br>(46.61 to<br>74.77)                         | -0.15<br>(-0.62 to<br>0.33)                        |
| Fiji           | Sickle<br>cell<br>disorders  | 0<br>(0 to 0)                                     | 0<br>(0 to 0)                                     | -0.05<br>(-0.07 to<br>0.29)                      | 0<br>(0 to 0)                                        | 0<br>(0 to 0)                                        | -0.36<br>(-0.62 to<br>-0.11)                       |
| Fiji           | Sickle                       | 0                                                 | 0                                                 | -0.06                                            | 3.43                                                 | 2.7                                                  | -0.44                                              |



| <b>Regions</b> | <b>Causes</b>                | <b>Cases in<br/>1990<br/>No.×103<br/>(95% UI)</b> | <b>Cases in<br/>2019<br/>No.×103<br/>(95% UI)</b> | <b>Change in<br/>absolute<br/>number<br/>(%)</b> | <b>Rates in<br/>1990 per<br/>100000<br/>(95% UI)</b> | <b>Rates in<br/>2019 per<br/>100000<br/>(95% UI)</b> | <b>EAPC<br/>from 1990<br/>and 2019<br/>(95%CI)</b> |
|----------------|------------------------------|---------------------------------------------------|---------------------------------------------------|--------------------------------------------------|------------------------------------------------------|------------------------------------------------------|----------------------------------------------------|
|                | cell trait                   | (0 to 0)                                          | (0 to 0)                                          | (−0.07 to<br>0.2)                                | (1.43 to<br>5.17)                                    | (1.1 to<br>4.24)                                     | (−0.65 to<br>−0.23)                                |
| <b>Fiji</b>    | G6PD<br>deficiency           | 0<br>(0 to 1)                                     | 1<br>(0 to 1)                                     | 0.17<br>(0.13 to<br>0.21)                        | 59.56<br>(46.07 to<br>74.12)                         | 57.9<br>(44.86 to<br>71.65)                          | 0.19<br>(−0.04 to<br>0.42)                         |
| <b>Fiji</b>    | G6PD trait                   | 2<br>(2 to 3)                                     | 3<br>(2 to 3)                                     | 0.04<br>(0 to 0.07)                              | 327.73<br>(294.9 to<br>360.31)                       | 284.78<br>(258.23 to<br>309.22)                      | −0.22<br>(−0.34 to<br>−0.09)                       |
| <b>Finland</b> | <b>Inherited<br/>anemias</b> | 12<br>(11 to 13)                                  | 9<br>(8 to 10)                                    | −0.27<br>(−0.29 to<br>−0.25)                     | 236.56<br>(213.1 to<br>262.05)                       | 156.09<br>(139.83 to<br>173.22)                      | −1.19<br>(−1.4 to<br>−0.98)                        |
| <b>Finland</b> | Thalassemi<br>as             | 0<br>(0 to 0)                                     | 0<br>(0 to 0)                                     | −0.31<br>(−0.4 to<br>−0.21)                      | 0.17<br>(0.11 to<br>0.23)                            | 0.1<br>(0.07 to<br>0.14)                             | −2.22<br>(−2.9 to<br>−1.54)                        |
| <b>Finland</b> | Thalassemi<br>as trait       | 1<br>(1 to 1)                                     | 1<br>(1 to 1)                                     | −0.24<br>(−0.29 to<br>−0.19)                     | 21.05<br>(18.18 to<br>24.2)                          | 14.44<br>(12.46 to<br>16.62)                         | −1.29<br>(−1.46 to<br>−1.11)                       |
| <b>Finland</b> | Sickle<br>cell<br>disorders  | 0<br>(0 to 0)                                     | 0<br>(0 to 0)                                     | −0.47<br>(−0.54 to<br>−0.41)                     | 0.24<br>(0.17 to<br>0.33)                            | 0.11<br>(0.08 to<br>0.15)                            | −1.88<br>(−2.5 to<br>−1.25)                        |
| <b>Finland</b> | Sickle<br>cell trait         | 2<br>(1 to 2)                                     | 1<br>(1 to 1)                                     | −0.4<br>(−0.44 to<br>−0.36)                      | 31.18<br>(25.74 to<br>37.77)                         | 16.98<br>(14.03 to<br>20.16)                         | −1.59<br>(−2.06 to<br>−1.12)                       |
| <b>Finland</b> | G6PD<br>deficiency           | 2<br>(1 to 2)                                     | 1<br>(1 to 2)                                     | −0.21<br>(−0.26 to<br>−0.17)                     | 34.68<br>(26.92 to<br>43.19)                         | 24.72<br>(19.06 to<br>31.24)                         | −0.97<br>(−1.16 to<br>−0.78)                       |
| <b>Finland</b> | G6PD trait                   | 7<br>(7 to 8)                                     | 6<br>(5 to 6)                                     | −0.26<br>(−0.28 to<br>−0.24)                     | 149.25<br>(133.59 to<br>165.05)                      | 99.74<br>(89.31 to<br>110.25)                        | −1.15<br>(−1.36 to<br>−0.94)                       |
| <b>France</b>  | <b>Inherited<br/>anemias</b> | 120<br>(109 to<br>131)                            | 98<br>(89 to 108)                                 | −0.18<br>(−0.2 to<br>−0.16)                      | 207.56<br>(189.48 to<br>225.97)                      | 148.11<br>(134.71 to<br>162.69)                      | −0.79<br>(−0.96 to<br>−0.62)                       |
| <b>France</b>  | Thalassemi<br>as             | 0<br>(0 to 0)                                     | 0<br>(0 to 0)                                     | −0.12<br>(−0.25 to<br>0.01)                      | 0.17<br>(0.11 to<br>0.23)                            | 0.13<br>(0.09 to<br>0.18)                            | −1.54<br>(−2.39 to<br>−0.69)                       |
| <b>France</b>  | Thalassemi<br>as trait       | 12<br>(11 to 14)                                  | 12<br>(10 to 13)                                  | −0.05<br>(−0.11 to<br>0.01)                      | 21.25<br>(18.58 to<br>24.1)                          | 17.7<br>(15.46 to<br>20.09)                          | −0.63<br>(−0.91 to<br>−0.35)                       |
| <b>France</b>  | Sickle<br>cell<br>disorders  | 1<br>(0 to 1)                                     | 0<br>(0 to 0)                                     | −0.62<br>(−0.66 to<br>−0.56)                     | 1<br>(0.84 to<br>1.2)                                | 0.34<br>(0.27 to<br>0.42)                            | −2.35<br>(−2.75 to<br>−1.96)                       |
| <b>France</b>  | Sickle<br>cell trait         | 34<br>(30 to 38)                                  | 19<br>(16 to 22)                                  | −0.44<br>(−0.49 to                               | 58.59<br>(52.63 to                                   | 28.56<br>(24.85 to                                   | −1.62<br>(−1.9 to                                  |

| Regions | Causes                      | Cases in<br>1990<br>No.×103<br>(95% UI) | Cases in<br>2019<br>No.×103<br>(95% UI) | Change in<br>absolute<br>number<br>(%) | Rates in<br>1990 per<br>100000<br>(95% UI) | Rates in<br>2019 per<br>100000<br>(95% UI) | EAPC<br>from 1990<br>and 2019<br>(95%CI) |
|---------|-----------------------------|-----------------------------------------|-----------------------------------------|----------------------------------------|--------------------------------------------|--------------------------------------------|------------------------------------------|
|         |                             |                                         |                                         | -0.4)                                  | 65.93)                                     | 32.71)                                     | -1.34)                                   |
| France  | G6PD<br>deficiency          | 13<br>(10 to 16)                        | 10<br>(8 to 12)                         | -0.24<br>(-0.29 to<br>-0.18)           | 22.06<br>(17.05 to<br>27.45)               | 14.69<br>(11.44 to<br>18.45)               | -1.17<br>(-1.55 to<br>-0.8)              |
| France  | G6PD trait                  | 60<br>(54 to 67)                        | 57<br>(51 to 64)                        | -0.05<br>(-0.09 to<br>-0.02)           | 104.48<br>(92.99 to<br>116.25)             | 86.69<br>(77.11 to<br>96.33)               | -0.34<br>(-0.48 to<br>-0.2)              |
| Gabon   | Inherited<br>anemias        | 22<br>(20 to 24)                        | 23<br>(21 to 25)                        | 0.06<br>(0.03 to<br>0.1)               | 2172.28<br>(1975.65 to<br>2381.62)         | 1309.12<br>(1178.53 to<br>1444.6)          | -1.74<br>(-1.8 to<br>-1.68)              |
| Gabon   | Thalassemi<br>as            | 0<br>(0 to 0)                           | 0<br>(0 to 0)                           | 1.11<br>(0.77 to<br>1.53)              | 0.08<br>(0.05 to<br>0.12)                  | 0.1<br>(0.06 to<br>0.15)                   | 0.35<br>(0.2 to<br>0.51)                 |
| Gabon   | Thalassemi<br>as trait      | 0<br>(0 to 0)                           | 0<br>(0 to 0)                           | 0.35<br>(0.23 to<br>0.48)              | 29.87<br>(25.17 to<br>35.16)               | 22.77<br>(18.68 to<br>27.1)                | -1.07<br>(-1.13 to<br>-1.01)             |
| Gabon   | Sickle<br>cell<br>disorders | 1<br>(0 to 1)                           | 1<br>(0 to 1)                           | -0.03<br>(-0.1 to<br>0.06)             | 61.27<br>(47.24 to<br>77.78)               | 33.81<br>(26.2 to<br>42.34)                | -2.06<br>(-2.12 to<br>-2.01)             |
| Gabon   | Sickle<br>cell trait        | 6<br>(5 to 7)                           | 6<br>(5 to 7)                           | 0.03<br>(-0.02 to<br>0.08)             | 590.58<br>(526.82 to<br>671.28)            | 345<br>(309.54 to<br>390.68)               | -1.65<br>(-1.79 to<br>-1.51)             |
| Gabon   | G6PD<br>deficiency          | 6<br>(5 to 8)                           | 7<br>(5 to 8)                           | 0.1<br>(0.01 to<br>0.2)                | 619.8<br>(495.75 to<br>763.43)             | 385.74<br>(299.24 to<br>477.1)             | -1.71<br>(-1.75 to<br>-1.66)             |
| Gabon   | G6PD trait                  | 9<br>(8 to 9)                           | 9<br>(9 to 10)                          | 0.06<br>(0.04 to<br>0.08)              | 870.68<br>(810.53 to<br>920.18)            | 521.71<br>(485.84 to<br>553)               | -1.83<br>(-1.86 to<br>-1.8)              |
| Gambia  | Inherited<br>anemias        | 18<br>(16 to 19)                        | 24<br>(22 to 26)                        | 0.35<br>(0.31 to<br>0.38)              | 1787.19<br>(1633.76 to<br>1951.13)         | 1062.23<br>(973.37 to<br>1152.3)           | -1.89<br>(-2.07 to<br>-1.71)             |
| Gambia  | Thalassemi<br>as            | 0<br>(0 to 0)                           | 0<br>(0 to 0)                           | 0.9<br>(0.63 to<br>1.23)               | 0.35<br>(0.24 to<br>0.51)                  | 0.3<br>(0.2 to<br>0.41)                    | -0.68<br>(-0.8 to<br>-0.55)              |
| Gambia  | Thalassemi<br>as trait      | 1<br>(1 to 1)                           | 1<br>(1 to 2)                           | 0.61<br>(0.5 to<br>0.71)               | 92.07<br>(76.38 to<br>111.52)              | 65.58<br>(54.73 to<br>78.45)               | -1.25<br>(-1.37 to<br>-1.12)             |
| Gambia  | Sickle<br>cell<br>disorders | 0<br>(0 to 0)                           | 0<br>(0 to 1)                           | 0.31<br>(0.2 to<br>0.42)               | 33.18<br>(27.36 to<br>40)                  | 19.23<br>(15.52 to<br>23.67)               | -2.08<br>(-2.25 to<br>-1.92)             |
| Gambia  | Sickle<br>cell trait        | 7<br>(6 to 7)                           | 9<br>(8 to 11)                          | 0.41<br>(0.34 to<br>0.48)              | 676.78<br>(613.5 to<br>750.46)             | 421.1<br>(377.5 to<br>469.59)              | -1.74<br>(-1.9 to<br>-1.59)              |

| <b>Regions</b> | <b>Causes</b>                | <b>Cases in<br/>1990<br/>No.×103<br/>(95% UI)</b> | <b>Cases in<br/>2019<br/>No.×103<br/>(95% UI)</b> | <b>Change in<br/>absolute<br/>number<br/>(%)</b> | <b>Rates in<br/>1990 per<br/>100000<br/>(95% UI)</b> | <b>Rates in<br/>2019 per<br/>100000<br/>(95% UI)</b> | <b>EAPC<br/>from 1990<br/>and 2019<br/>(95%CI)</b> |
|----------------|------------------------------|---------------------------------------------------|---------------------------------------------------|--------------------------------------------------|------------------------------------------------------|------------------------------------------------------|----------------------------------------------------|
| <b>Gambia</b>  | G6PD<br>deficiency           | 3<br>(2 to 4)                                     | 3<br>(2 to 3)                                     | -0.11<br>(-0.17 to<br>-0.05)                     | 290.29<br>(224.5 to<br>359.25)                       | 114.17<br>(88.48 to<br>141.72)                       | -3.34<br>(-3.82 to<br>-2.86)                       |
| <b>Gambia</b>  | G6PD trait                   | 7<br>(6 to 8)                                     | 10<br>(9 to 11)                                   | 0.44<br>(0.4 to<br>0.49)                         | 694.52<br>(625.12 to<br>758.98)                      | 441.86<br>(397.64 to<br>482.79)                      | -1.61<br>(-1.73 to<br>-1.49)                       |
| <b>Georgia</b> | <b>Inherited<br/>anemias</b> | 12<br>(11 to 13)                                  | 7<br>(6 to 8)                                     | -0.41<br>(-0.42 to<br>-0.39)                     | 220.42<br>(198.45 to<br>244.32)                      | 196.3<br>(176.72 to<br>218.03)                       | 0.81<br>(0.33 to<br>1.29)                          |
| <b>Georgia</b> | Thalassemi<br>as             | 0<br>(0 to 0)                                     | 0<br>(0 to 0)                                     | -0.41<br>(-0.49 to<br>-0.31)                     | 1.83<br>(1.35 to<br>2.52)                            | 1.62<br>(1.18 to<br>2.21)                            | 0.92<br>(0.42 to<br>1.43)                          |
| <b>Georgia</b> | Thalassemi<br>as trait       | 4<br>(4 to 5)                                     | 3<br>(2 to 3)                                     | -0.36<br>(-0.4 to<br>-0.32)                      | 77.58<br>(65.3 to<br>92.17)                          | 74.83<br>(63.5 to<br>87.94)                          | 1.09<br>(0.63 to<br>1.56)                          |
| <b>Georgia</b> | Sickle<br>cell<br>disorders  | 0<br>(0 to 0)                                     | 0<br>(0 to 0)                                     | -0.42<br>(-0.52 to<br>-0.28)                     | 0.01<br>(0.01 to<br>0.01)                            | 0.01<br>(0 to 0.01)                                  | 0.72<br>(0.26 to<br>1.18)                          |
| <b>Georgia</b> | Sickle<br>cell trait         | 0<br>(0 to 0)                                     | 0<br>(0 to 0)                                     | -0.43<br>(-0.49 to<br>-0.36)                     | 6.56<br>(5.21 to<br>8.28)                            | 5.66<br>(4.51 to<br>7.06)                            | 0.65<br>(0.19 to<br>1.11)                          |
| <b>Georgia</b> | G6PD<br>deficiency           | 1<br>(1 to 1)                                     | 1<br>(0 to 1)                                     | -0.42<br>(-0.46 to<br>-0.39)                     | 20.38<br>(15.66 to<br>25.96)                         | 17.66<br>(13.6 to<br>22.31)                          | 0.69<br>(0.23 to<br>1.15)                          |
| <b>Georgia</b> | G6PD trait                   | 6<br>(6 to 7)                                     | 4<br>(3 to 4)                                     | -0.44<br>(-0.44 to<br>-0.44)                     | 114.06<br>(101.76 to<br>126.84)                      | 96.52<br>(86.11 to<br>107.34)                        | 0.63<br>(0.13 to<br>1.14)                          |
| <b>Germany</b> | <b>Inherited<br/>anemias</b> | 173<br>(157 to<br>190)                            | 149<br>(135 to<br>164)                            | -0.14<br>(-0.17 to<br>-0.12)                     | 216.79<br>(196.03 to<br>238.24)                      | 175.25<br>(158.44 to<br>192.89)                      | -0.66<br>(-0.84 to<br>-0.48)                       |
| <b>Germany</b> | Thalassemi<br>as             | 0<br>(0 to 1)                                     | 0<br>(0 to 0)                                     | -0.17<br>(-0.34 to<br>0.02)                      | 0.55<br>(0.39 to<br>0.74)                            | 0.43<br>(0.32 to<br>0.55)                            | -1.64<br>(-2.52 to<br>-0.75)                       |
| <b>Germany</b> | Thalassemi<br>as trait       | 33<br>(28 to 38)                                  | 32<br>(28 to 37)                                  | -0.03<br>(-0.1 to<br>0.04)                       | 41.67<br>(35.59 to<br>48.07)                         | 38.02<br>(32.95 to<br>43.39)                         | -0.43<br>(-0.79 to<br>-0.07)                       |
| <b>Germany</b> | Sickle<br>cell<br>disorders  | 0<br>(0 to 0)                                     | 0<br>(0 to 0)                                     | -0.01<br>(-0.17 to<br>0.19)                      | 0.09<br>(0.06 to<br>0.12)                            | 0.08<br>(0.07 to<br>0.1)                             | 1.22<br>(0.73 to<br>1.71)                          |
| <b>Germany</b> | Sickle<br>cell trait         | 14<br>(11 to 16)                                  | 12<br>(10 to 13)                                  | -0.15<br>(-0.23 to<br>-0.05)                     | 17.22<br>(14.25 to<br>20.44)                         | 13.85<br>(12.2 to<br>15.66)                          | 0.12<br>(-0.21 to<br>0.45)                         |
| <b>Germany</b> | G6PD                         | 24                                                | 21                                                | -0.13                                            | 30.43                                                | 24.95                                                | -0.66                                              |

| Regions | Causes                      | Cases in<br>1990<br>No.×103<br>(95% UI) | Cases in<br>2019<br>No.×103<br>(95% UI) | Change in<br>absolute<br>number<br>(%) | Rates in<br>1990 per<br>100000<br>(95% UI) | Rates in<br>2019 per<br>100000<br>(95% UI) | EAPC<br>from 1990<br>and 2019<br>(95%CI) |
|---------|-----------------------------|-----------------------------------------|-----------------------------------------|----------------------------------------|--------------------------------------------|--------------------------------------------|------------------------------------------|
|         | deficiency                  | (19 to 30)                              | (16 to 26)                              | (−0.16 to<br>−0.09)                    | (23.39 to<br>37.99)                        | (19.24 to<br>30.96)                        | (−0.9 to<br>−0.43)                       |
| Germany | G6PD trait                  | 101<br>(91 to 111)                      | 83<br>(75 to 91)                        | −0.18<br>(−0.21 to<br>−0.15)           | 126.83<br>(113.86 to<br>139.1)             | 97.93<br>(87.76 to<br>107.11)              | −0.83<br>(−1.02 to<br>−0.63)             |
| Ghana   | Inherited<br>anemias        | 300<br>(273 to<br>327)                  | 401<br>(365 to<br>439)                  | 0.34<br>(0.29 to<br>0.39)              | 1996.15<br>(1815.77 to<br>2179.78)         | 1271.75<br>(1158.04 to<br>1392.48)         | −1.03<br>(−1.24 to<br>−0.82)             |
| Ghana   | Thalassemi<br>as            | 0<br>(0 to 0)                           | 0<br>(0 to 0)                           | 1.46<br>(1 to 1.92)                    | 0.12<br>(0.08 to<br>0.16)                  | 0.14<br>(0.08 to<br>0.2)                   | 0.47<br>(0.36 to<br>0.58)                |
| Ghana   | Thalassemi<br>as trait      | 6<br>(5 to 8)                           | 11<br>(9 to 13)                         | 0.67<br>(0.54 to<br>0.8)               | 43.19<br>(36.27 to<br>51.06)               | 34.34<br>(28.61 to<br>40.45)               | −0.77<br>(−0.86 to<br>−0.69)             |
| Ghana   | Sickle<br>cell<br>disorders | 12<br>(11 to 13)                        | 16<br>(13 to 19)                        | 0.34<br>(0.18 to<br>0.51)              | 78.63<br>(72 to<br>86.92)                  | 50.11<br>(42.77 to<br>58.86)               | −1.41<br>(−1.53 to<br>−1.3)              |
| Ghana   | Sickle<br>cell trait        | 113<br>(105 to<br>121)                  | 154<br>(137 to<br>173)                  | 0.36<br>(0.26 to<br>0.47)              | 751.01<br>(702.46 to<br>808.59)            | 487.51<br>(434.26 to<br>547.65)            | −1.36<br>(−1.47 to<br>−1.26)             |
| Ghana   | G6PD<br>deficiency          | 71<br>(55 to 87)                        | 82<br>(63 to 102)                       | 0.16<br>(0.07 to<br>0.25)              | 469.68<br>(363.72 to<br>580.6)             | 258.85<br>(200.16 to<br>322.33)            | −0.36<br>(−0.96 to<br>0.23)              |
| Ghana   | G6PD trait                  | 98<br>(89 to 107)                       | 139<br>(126 to<br>151)                  | 0.42<br>(0.37 to<br>0.45)              | 653.52<br>(592.73 to<br>710.5)             | 440.81<br>(400.64 to<br>478.1)             | −1.01<br>(−1.2 to<br>−0.81)              |
| Greece  | Inherited<br>anemias        | 21<br>(21 to 22)                        | 18<br>(16 to 19)                        | −0.17<br>(−0.25 to<br>−0.1)            | 206.35<br>(198.4 to<br>215.22)             | 171.26<br>(155.22 to<br>188.52)            | −0.38<br>(−0.77 to<br>0)                 |
| Greece  | Thalassemi<br>as            | 0<br>(0 to 0)                           | 0<br>(0 to 0)                           | −0.16<br>(−0.25 to<br>−0.06)           | 0.73<br>(0.55 to<br>0.93)                  | 0.62<br>(0.46 to<br>0.8)                   | −0.38<br>(−0.63 to<br>−0.12)             |
| Greece  | Thalassemi<br>as trait      | 6<br>(5 to 6)                           | 5<br>(4 to 6)                           | −0.15<br>(−0.2 to<br>−0.1)             | 55.25<br>(48.06 to<br>62.24)               | 47.19<br>(40.87 to<br>53.52)               | −0.26<br>(−0.48 to<br>−0.03)             |
| Greece  | Sickle<br>cell<br>disorders | 0<br>(0 to 0)                           | 0<br>(0 to 0)                           | −0.09<br>(−0.17 to<br>0.01)            | 0.09<br>(0.06 to<br>0.13)                  | 0.09<br>(0.06 to<br>0.12)                  | 0.04<br>(−0.13 to<br>0.22)               |
| Greece  | Sickle<br>cell trait        | 1<br>(1 to 1)                           | 1<br>(1 to 1)                           | 0.04<br>(−0.04 to<br>0.13)             | 7.94<br>(6.9 to<br>9.19)                   | 8.33<br>(7.02 to<br>9.81)                  | 0.49<br>(0.35 to<br>0.64)                |
| Greece  | G6PD<br>deficiency          | 3<br>(3 to 3)                           | 3<br>(2 to 3)                           | −0.23<br>(−0.39 to                     | 31.34<br>(30.2 to                          | 24.29<br>(18.86 to                         | −0.04<br>(−0.83 to                       |

| Regions   | Causes                      | Cases in<br>1990<br>No.×103<br>(95% UI) | Cases in<br>2019<br>No.×103<br>(95% UI) | Change in<br>absolute<br>number<br>(%) | Rates in<br>1990 per<br>100000<br>(95% UI) | Rates in<br>2019 per<br>100000<br>(95% UI) | EAPC<br>from 1990<br>and 2019<br>(95%CI) |
|-----------|-----------------------------|-----------------------------------------|-----------------------------------------|----------------------------------------|--------------------------------------------|--------------------------------------------|------------------------------------------|
|           |                             |                                         |                                         | -0.04)                                 | 32.7)                                      | 30.42)                                     | 0.77)                                    |
| Greece    | G6PD trait                  | 12<br>(11 to 12)                        | 9<br>(8 to 10)                          | -0.19<br>(-0.27 to<br>-0.11)           | 110.98<br>(108.13 to<br>114.24)            | 90.73<br>(81.21 to<br>100.3)               | -0.63<br>(-1.02 to<br>-0.23)             |
| Greenland | Inherited<br>anemias        | 0<br>(0 to 0)                           | 0<br>(0 to 0)                           | -0.47<br>(-0.49 to<br>-0.45)           | 390.39<br>(338.56 to<br>441.65)            | 203.64<br>(175.95 to<br>234.35)            | -2.28<br>(-2.42 to<br>-2.14)             |
| Greenland | Thalassemi<br>as            | 0<br>(0 to 0)                           | 0<br>(0 to 0)                           | -0.62<br>(-0.66 to<br>-0.58)           | 0.27<br>(0.16 to<br>0.42)                  | 0.1<br>(0.06 to<br>0.16)                   | -3.31<br>(-3.56 to<br>-3.07)             |
| Greenland | Thalassemi<br>as trait      | 0<br>(0 to 0)                           | 0<br>(0 to 0)                           | -0.24<br>(-0.37 to<br>0.19)            | 4.23<br>(2.45 to<br>5.97)                  | 3.19<br>(2.16 to<br>4.31)                  | -0.93<br>(-1.18 to<br>-0.68)             |
| Greenland | Sickle<br>cell<br>disorders | 0<br>(0 to 0)                           | 0<br>(0 to 0)                           | -0.37<br>(-0.45 to<br>-0.3)            | 0.08<br>(0.05 to<br>0.12)                  | 0.05<br>(0.03 to<br>0.08)                  | -1.63<br>(-1.87 to<br>-1.38)             |
| Greenland | Sickle<br>cell trait        | 0<br>(0 to 0)                           | 0<br>(0 to 0)                           | -0.37<br>(-0.37 to<br>-0.26)           | 3.31<br>(1.41 to<br>5.83)                  | 2.08<br>(0.88 to<br>3.61)                  | -1.61<br>(-1.85 to<br>-1.37)             |
| Greenland | G6PD<br>deficiency          | 0<br>(0 to 0)                           | 0<br>(0 to 0)                           | -0.46<br>(-0.49 to<br>-0.42)           | 103.33<br>(79.74 to<br>128.51)             | 55.65<br>(43.11 to<br>69.48)               | -2.23<br>(-2.38 to<br>-2.08)             |
| Greenland | G6PD trait                  | 0<br>(0 to 0)                           | 0<br>(0 to 0)                           | -0.48<br>(-0.5 to<br>-0.46)            | 279.18<br>(250.32 to<br>305.53)            | 142.58<br>(127.02 to<br>158.85)            | -2.33<br>(-2.47 to<br>-2.2)              |
| Grenada   | Inherited<br>anemias        | 1<br>(0 to 1)                           | 0<br>(0 to 0)                           | -0.26<br>(-0.29 to<br>-0.23)           | 611.7<br>(536.95 to<br>692.22)             | 375.36<br>(331.23 to<br>424.73)            | -1.86<br>(-1.93 to<br>-1.78)             |
| Grenada   | Thalassemi<br>as            | 0<br>(0 to 0)                           | 0<br>(0 to 0)                           | 0.17<br>(-0.29 to<br>1.34)             | 0.01<br>(0.01 to<br>0.02)                  | 0.01<br>(0.01 to<br>0.02)                  | -0.33<br>(-0.57 to<br>-0.09)             |
| Grenada   | Thalassemi<br>as trait      | 0<br>(0 to 0)                           | 0<br>(0 to 0)                           | -0.16<br>(-0.29 to<br>0.08)            | 8.26<br>(6.29 to<br>10.5)                  | 5.76<br>(4.45 to<br>7.02)                  | -1.37<br>(-1.45 to<br>-1.29)             |
| Grenada   | Sickle<br>cell<br>disorders | 0<br>(0 to 0)                           | 0<br>(0 to 0)                           | -0.15<br>(-0.24 to<br>-0.04)           | 6.66<br>(4.79 to<br>8.89)                  | 4.71<br>(3.37 to<br>6.36)                  | -1.74<br>(-2 to<br>-1.47)                |
| Grenada   | Sickle<br>cell trait        | 0<br>(0 to 0)                           | 0<br>(0 to 0)                           | -0.22<br>(-0.28 to<br>-0.16)           | 196.58<br>(165.46 to<br>234.23)            | 127.25<br>(105.15 to<br>150.6)             | -1.83<br>(-1.98 to<br>-1.68)             |
| Grenada   | G6PD<br>deficiency          | 0<br>(0 to 0)                           | 0<br>(0 to 0)                           | -0.29<br>(-0.34 to<br>-0.23)           | 183.37<br>(141.48 to<br>227.88)            | 108.58<br>(83.83 to<br>136.26)             | -1.88<br>(-1.92 to<br>-1.85)             |

| <b>Regions</b>   | <b>Causes</b>                | <b>Cases in<br/>1990<br/>No.×103<br/>(95% UI)</b> | <b>Cases in<br/>2019<br/>No.×103<br/>(95% UI)</b> | <b>Change in<br/>absolute<br/>number<br/>(%)</b> | <b>Rates in<br/>1990 per<br/>100000<br/>(95% UI)</b> | <b>Rates in<br/>2019 per<br/>100000<br/>(95% UI)</b> | <b>EAPC<br/>from 1990<br/>and 2019<br/>(95%CI)</b> |
|------------------|------------------------------|---------------------------------------------------|---------------------------------------------------|--------------------------------------------------|------------------------------------------------------|------------------------------------------------------|----------------------------------------------------|
| <b>Grenada</b>   | G6PD trait                   | 0<br>(0 to 0)                                     | 0<br>(0 to 0)                                     | -0.28<br>(-0.31 to<br>-0.26)                     | 216.82<br>(193.17 to<br>241.3)                       | 129.05<br>(114.81 to<br>143.75)                      | -1.88<br>(-1.93 to<br>-1.84)                       |
| <b>Guam</b>      | <b>Inherited<br/>anemias</b> | 1<br>(1 to 1)                                     | 1<br>(1 to 1)                                     | -0.06<br>(-0.09 to<br>-0.02)                     | 592.05<br>(526.05 to<br>659.26)                      | 446.99<br>(396.23 to<br>499.37)                      | -1.08<br>(-1.48 to<br>-0.68)                       |
| <b>Guam</b>      | Thalassemi<br>as             | 0<br>(0 to 0)                                     | 0<br>(0 to 0)                                     | -0.23<br>(-0.33 to<br>-0.12)                     | 2.62<br>(1.39 to<br>4.14)                            | 1.62<br>(0.86 to<br>2.53)                            | -0.64<br>(-1.82 to<br>0.56)                        |
| <b>Guam</b>      | Thalassemi<br>as trait       | 0<br>(0 to 0)                                     | 0<br>(0 to 0)                                     | -0.17<br>(-0.22 to<br>-0.12)                     | 87.14<br>(66.11 to<br>108.06)                        | 57.9<br>(44.17 to<br>71.39)                          | -1.08<br>(-1.68 to<br>-0.48)                       |
| <b>Guam</b>      | Sickle<br>cell<br>disorders  | 0<br>(0 to 0)                                     | 0<br>(0 to 0)                                     | -0.11<br>(-0.15 to<br>0.42)                      | 0<br>(0 to 0)                                        | 0<br>(0 to 0)                                        | -1.33<br>(-1.65 to<br>-1.01)                       |
| <b>Guam</b>      | Sickle<br>cell trait         | 0<br>(0 to 0)                                     | 0<br>(0 to 0)                                     | -0.13<br>(-0.15 to<br>0.18)                      | 3.48<br>(1.53 to<br>5.59)                            | 2.44<br>(1.04 to<br>3.86)                            | -1.38<br>(-1.68 to<br>-1.08)                       |
| <b>Guam</b>      | G6PD<br>deficiency           | 0<br>(0 to 0)                                     | 0<br>(0 to 0)                                     | 0.03<br>(-0.03 to<br>0.08)                       | 122.51<br>(94.51 to<br>151.54)                       | 101.01<br>(78.06 to<br>126.39)                       | -0.86<br>(-1.28 to<br>-0.43)                       |
| <b>Guam</b>      | G6PD trait                   | 1<br>(0 to 1)                                     | 0<br>(0 to 1)                                     | -0.06<br>(-0.09 to<br>-0.02)                     | 376.3<br>(338.37 to<br>410.43)                       | 284.03<br>(256.94 to<br>309.01)                      | -1.17<br>(-1.53 to<br>-0.8)                        |
| <b>Guatemala</b> | <b>Inherited<br/>anemias</b> | 60<br>(53 to 68)                                  | 64<br>(56 to 71)                                  | 0.05<br>(0.02 to<br>0.08)                        | 759.38<br>(666.87 to<br>849.16)                      | 358.75<br>(315.72 to<br>399.73)                      | -2.69<br>(-2.78 to<br>-2.6)                        |
| <b>Guatemala</b> | Thalassemi<br>as             | 0<br>(0 to 0)                                     | 0<br>(0 to 0)                                     | 1.09<br>(0.2 to<br>3.36)                         | 0.02<br>(0.01 to<br>0.04)                            | 0.02<br>(0.01 to<br>0.03)                            | -0.41<br>(-0.65 to<br>-0.17)                       |
| <b>Guatemala</b> | Thalassemi<br>as trait       | 1<br>(1 to 1)                                     | 1<br>(1 to 2)                                     | 0.52<br>(0.2 to<br>1.09)                         | 11.75<br>(8.43 to<br>15.76)                          | 8<br>(5.89 to<br>10.08)                              | -1.47<br>(-1.56 to<br>-1.39)                       |
| <b>Guatemala</b> | Sickle<br>cell<br>disorders  | 0<br>(0 to 0)                                     | 0<br>(0 to 0)                                     | 0.23<br>(0.13 to<br>0.41)                        | 0.1<br>(0.05 to<br>0.16)                             | 0.05<br>(0.03 to<br>0.09)                            | -2.21<br>(-2.32 to<br>-2.09)                       |
| <b>Guatemala</b> | Sickle<br>cell trait         | 0<br>(0 to 1)                                     | 0<br>(0 to 1)                                     | 0.15<br>(-0.32 to<br>0.2)                        | 4.91<br>(1.95 to<br>8.25)                            | 2.54<br>(1.03 to<br>4.44)                            | -2.34<br>(-2.44 to<br>-2.23)                       |
| <b>Guatemala</b> | G6PD<br>deficiency           | 12<br>(9 to 15)                                   | 11<br>(8 to 13)                                   | -0.1<br>(-0.15 to<br>-0.06)                      | 150.76<br>(115.96 to<br>188.57)                      | 60.77<br>(46.74 to<br>75.33)                         | -3.18<br>(-3.4 to<br>-2.96)                        |
| <b>Guatemala</b> | G6PD trait                   | 47                                                | 51                                                | 0.08                                             | 591.83                                               | 287.37                                               | -2.61                                              |

| Regions           | Causes                      | Cases in<br>1990<br>No.×103<br>(95% UI) | Cases in<br>2019<br>No.×103<br>(95% UI) | Change in<br>absolute<br>number<br>(%) | Rates in<br>1990 per<br>100000<br>(95% UI) | Rates in<br>2019 per<br>100000<br>(95% UI) | EAPC<br>from 1990<br>and 2019<br>(95%CI) |
|-------------------|-----------------------------|-----------------------------------------|-----------------------------------------|----------------------------------------|--------------------------------------------|--------------------------------------------|------------------------------------------|
|                   |                             | (42 to 51)                              | (46 to 56)                              | (0.05 to<br>0.11)                      | (532.13 to<br>646.09)                      | (258.02 to<br>313.75)                      | (−2.68 to<br>−2.54)                      |
| Guinea            | Inherited<br>anemias        | 130<br>(120 to<br>141)                  | 203<br>(187 to<br>220)                  | 0.56<br>(0.52 to<br>0.6)               | 2105.97<br>(1940.88 to<br>2279.32)         | 1605.14<br>(1480.38 to<br>1739.12)         | −0.86<br>(−0.91 to<br>−0.8)              |
| Guinea            | Thalassemi<br>as            | 0<br>(0 to 0)                           | 0<br>(0 to 0)                           | 1.04<br>(0.77 to<br>1.34)              | 0.41<br>(0.28 to<br>0.58)                  | 0.41<br>(0.28 to<br>0.57)                  | 0.06<br>(−0.05 to<br>0.16)               |
| Guinea            | Thalassemi<br>as trait      | 6<br>(5 to 7)                           | 11<br>(9 to 13)                         | 0.73<br>(0.63 to<br>0.83)              | 98.91<br>(82.26 to<br>118.45)              | 83.76<br>(70.44 to<br>100.29)              | −0.5<br>(−0.57 to<br>−0.43)              |
| Guinea            | Sickle<br>cell<br>disorders | 6<br>(5 to 7)                           | 9<br>(7 to 11)                          | 0.54<br>(0.42 to<br>0.68)              | 92.46<br>(75.86 to<br>111.36)              | 69.76<br>(56.59 to<br>84.33)               | −0.89<br>(−0.94 to<br>−0.84)             |
| Guinea            | Sickle<br>cell trait        | 67<br>(61 to 73)                        | 103<br>(93 to 113)                      | 0.54<br>(0.48 to<br>0.61)              | 1083.04<br>(980.81 to<br>1185.09)          | 817.21<br>(739.51 to<br>894.26)            | −0.89<br>(−0.94 to<br>−0.84)             |
| Guinea            | G6PD<br>deficiency          | 16<br>(12 to 20)                        | 25<br>(19 to 31)                        | 0.56<br>(0.45 to<br>0.68)              | 259.93<br>(200.88 to<br>328.36)            | 198.08<br>(152.89 to<br>247.01)            | −0.76<br>(−0.84 to<br>−0.68)             |
| Guinea            | G6PD trait                  | 35<br>(32 to 39)                        | 55<br>(50 to 60)                        | 0.56<br>(0.5 to<br>0.62)               | 571.23<br>(511.31 to<br>631.78)            | 435.91<br>(392.17 to<br>476.8)             | −0.9<br>(−0.96 to<br>−0.83)              |
| Guinea-Biss<br>au | Inherited<br>anemias        | 14<br>(12 to 15)                        | 19<br>(17 to 21)                        | 0.35<br>(0.32 to<br>0.38)              | 1369.25<br>(1222.09 to<br>1527.38)         | 979.13<br>(873.1 to<br>1088.89)            | −1.09<br>(−1.2 to<br>−0.97)              |
| Guinea-Biss<br>au | Thalassemi<br>as            | 0<br>(0 to 0)                           | 0<br>(0 to 0)                           | 0.76<br>(0.5 to<br>1.06)               | 0.39<br>(0.26 to<br>0.57)                  | 0.36<br>(0.25 to<br>0.5)                   | −0.2<br>(−0.29 to<br>−0.1)               |
| Guinea-Biss<br>au | Thalassemi<br>as trait      | 1<br>(1 to 1)                           | 1<br>(1 to 2)                           | 0.51<br>(0.41 to<br>0.61)              | 92.58<br>(76.76 to<br>113.41)              | 73.84<br>(61.87 to<br>88.25)               | −0.73<br>(−0.82 to<br>−0.63)             |
| Guinea-Biss<br>au | Sickle<br>cell<br>disorders | 0<br>(0 to 0)                           | 0<br>(0 to 0)                           | 0.34<br>(0.25 to<br>0.44)              | 2.82<br>(2.22 to<br>3.52)                  | 2<br>(1.56 to<br>2.5)                      | −1.26<br>(−1.46 to<br>−1.05)             |
| Guinea-Biss<br>au | Sickle<br>cell trait        | 2<br>(2 to 2)                           | 3<br>(2 to 3)                           | 0.34<br>(0.29 to<br>0.4)               | 196.56<br>(171.01 to<br>224.04)            | 139.97<br>(122.08 to<br>160.13)            | −1.19<br>(−1.35 to<br>−1.02)             |
| Guinea-Biss<br>au | G6PD<br>deficiency          | 4<br>(3 to 4)                           | 5<br>(4 to 6)                           | 0.3<br>(0.24 to<br>0.37)               | 348.96<br>(270.16 to<br>441.21)            | 240.4<br>(184.97 to<br>301.1)              | −1.16<br>(−1.29 to<br>−1.03)             |
| Guinea-Biss<br>au | G6PD trait                  | 7<br>(7 to 8)                           | 10<br>(9 to 11)                         | 0.35<br>(0.32 to                       | 727.95<br>(662.21 to                       | 522.57<br>(473.78 to                       | −1.08<br>(−1.17 to                       |

| Regions | Causes                      | Cases in<br>1990<br>No.×103<br>(95% UI) | Cases in<br>2019<br>No.×103<br>(95% UI) | Change in<br>absolute<br>number<br>(%) | Rates in<br>1990 per<br>100000<br>(95% UI) | Rates in<br>2019 per<br>100000<br>(95% UI) | EAPC<br>from 1990<br>and 2019<br>(95%CI) |
|---------|-----------------------------|-----------------------------------------|-----------------------------------------|----------------------------------------|--------------------------------------------|--------------------------------------------|------------------------------------------|
|         |                             |                                         |                                         | 0. 4)                                  | 790. 34)                                   | 568. 2)                                    | −0. 98)                                  |
| Guyana  | Inherited<br>anemias        | 6<br>(6 to 7)                           | 4<br>(4 to 5)                           | −0. 35<br>(−0. 38 to<br>−0. 33)        | 817. 73<br>(724. 2 to<br>925. 47)          | 527. 65<br>(463. 65 to<br>596. 34)         | −1. 61<br>(−1. 85 to<br>−1. 37)          |
| Guyana  | Thalassemi<br>as            | 0<br>(0 to 0)                           | 0<br>(0 to 0)                           | 0. 05<br>(−0. 37 to<br>1. 01)          | 0. 02<br>(0. 01 to<br>0. 03)               | 0. 02<br>(0. 01 to<br>0. 02)               | −0. 03<br>(−0. 16 to<br>0. 09)           |
| Guyana  | Thalassemi<br>as trait      | 0<br>(0 to 0)                           | 0<br>(0 to 0)                           | −0. 25<br>(−0. 37 to<br>−0. 07)        | 11. 22<br>(8. 61 to<br>14. 19)             | 8. 4<br>(6. 46 to<br>10. 07)               | −1. 14<br>(−1. 27 to<br>−1)              |
| Guyana  | Sickle<br>cell<br>disorders | 0<br>(0 to 0)                           | 0<br>(0 to 0)                           | −0. 29<br>(−0. 37 to<br>−0. 2)         | 9. 2<br>(6. 67 to<br>12. 23)               | 6. 54<br>(4. 7 to<br>8. 79)                | −1. 3<br>(−1. 7 to<br>−0. 9)             |
| Guyana  | Sickle<br>cell trait        | 2<br>(2 to 2)                           | 1<br>(1 to 2)                           | −0. 33<br>(−0. 38 to<br>−0. 29)        | 267. 5<br>(224. 62 to<br>315. 82)          | 178. 29<br>(147. 28 to<br>211. 67)         | −1. 49<br>(−1. 8 to<br>−1. 19)           |
| Guyana  | G6PD<br>deficiency          | 2<br>(1 to 2)                           | 1<br>(1 to 1)                           | −0. 37<br>(−0. 43 to<br>−0. 32)        | 246. 5<br>(189. 74 to<br>305. 61)          | 154. 26<br>(118. 94 to<br>192. 13)         | −1. 72<br>(−1. 92 to<br>−1. 51)          |
| Guyana  | G6PD trait                  | 2<br>(2 to 2)                           | 1<br>(1 to 2)                           | −0. 36<br>(−0. 39 to<br>−0. 33)        | 283. 3<br>(252. 19 to<br>313. 19)          | 180. 13<br>(160. 34 to<br>200. 68)         | −1. 67<br>(−1. 89 to<br>−1. 46)          |
| Haiti   | Inherited<br>anemias        | 86<br>(75 to 97)                        | 117<br>(103 to<br>132)                  | 0. 36<br>(0. 3 to<br>0. 41)            | 1347. 88<br>(1181. 23 to<br>1528. 27)      | 941. 32<br>(827. 08 to<br>1066. 97)        | −1. 17<br>(−1. 21 to<br>−1. 12)          |
| Haiti   | Thalassemi<br>as            | 0<br>(0 to 0)                           | 0<br>(0 to 0)                           | 0. 73<br>(0. 32 to<br>1. 37)           | 0. 06<br>(0. 04 to<br>0. 08)               | 0. 05<br>(0. 04 to<br>0. 07)               | −0. 34<br>(−0. 48 to<br>−0. 2)           |
| Haiti   | Thalassemi<br>as trait      | 2<br>(2 to 2)                           | 3<br>(3 to 4)                           | 0. 48<br>(0. 32 to<br>0. 67)           | 32. 25<br>(27. 1 to<br>37. 95)             | 24. 47<br>(20. 78 to<br>28. 62)            | −0. 85<br>(−0. 92 to<br>−0. 78)          |
| Haiti   | Sickle<br>cell<br>disorders | 1<br>(1 to 2)                           | 2<br>(2 to 3)                           | 0. 41<br>(0. 3 to<br>0. 53)            | 22. 61<br>(18. 82 to<br>27. 59)            | 16. 37<br>(13. 64 to<br>20. 34)            | −0. 99<br>(−1. 07 to<br>−0. 91)          |
| Haiti   | Sickle<br>cell trait        | 30<br>(27 to 34)                        | 42<br>(38 to 47)                        | 0. 38<br>(0. 31 to<br>0. 45)           | 475. 88<br>(428. 96 to<br>534. 47)         | 336. 91<br>(303. 06 to<br>378. 73)         | −1. 06<br>(−1. 12 to<br>−1)              |
| Haiti   | G6PD<br>deficiency          | 36<br>(28 to 46)                        | 49<br>(38 to 60)                        | 0. 34<br>(0. 2 to<br>0. 46)            | 569. 05<br>(440. 34 to<br>716. 84)         | 392. 03<br>(302. 68 to<br>483. 51)         | −1. 25<br>(−1. 29 to<br>−1. 21)          |
| Haiti   | G6PD trait                  | 16<br>(14 to 18)                        | 21<br>(19 to 24)                        | 0. 35<br>(0. 29 to<br>0. 42)           | 248. 03<br>(218. 32 to<br>279. 57)         | 171. 49<br>(150. 57 to<br>193. 18)         | −1. 24<br>(−1. 28 to<br>−1. 2)           |



| <b>Regions</b> | <b>Causes</b>               | <b>Cases in<br/>1990<br/>No.×103<br/>(95% UI)</b> | <b>Cases in<br/>2019<br/>No.×103<br/>(95% UI)</b> | <b>Change in<br/>absolute<br/>number<br/>(%)</b> | <b>Rates in<br/>1990 per<br/>100000<br/>(95% UI)</b> | <b>Rates in<br/>2019 per<br/>100000<br/>(95% UI)</b> | <b>EAPC<br/>from 1990<br/>and 2019<br/>(95%CI)</b> |
|----------------|-----------------------------|---------------------------------------------------|---------------------------------------------------|--------------------------------------------------|------------------------------------------------------|------------------------------------------------------|----------------------------------------------------|
| Honduras       | Inherited<br>anemias        | 32<br>(28 to 36)                                  | 36<br>(32 to 40)                                  | 0.13<br>(0.09 to<br>0.17)                        | 678.05<br>(596.13 to<br>757.26)                      | 368.24<br>(325.01 to<br>411.58)                      | -2.23<br>(-2.29 to<br>-2.16)                       |
| Honduras       | Thalassemi<br>as            | 0<br>(0 to 0)                                     | 0<br>(0 to 0)                                     | 1.25<br>(0.29 to<br>3.74)                        | 0.02<br>(0.01 to<br>0.03)                            | 0.02<br>(0.01 to<br>0.03)                            | 0.07<br>(-0.14 to<br>0.28)                         |
| Honduras       | Thalassemi<br>as trait      | 0<br>(0 to 1)                                     | 1<br>(1 to 1)                                     | 0.63<br>(0.29 to<br>1.23)                        | 10.42<br>(7.54 to<br>14.05)                          | 8.12<br>(6.05 to<br>10.3)                            | -1.01<br>(-1.07 to<br>-0.94)                       |
| Honduras       | Sickle<br>cell<br>disorders | 0<br>(0 to 0)                                     | 0<br>(0 to 0)                                     | 0.31<br>(0.15 to<br>0.94)                        | 0.02<br>(0.01 to<br>0.04)                            | 0.01<br>(0.01 to<br>0.02)                            | -1.71<br>(-1.85 to<br>-1.58)                       |
| Honduras       | Sickle<br>cell trait        | 0<br>(0 to 0)                                     | 0<br>(0 to 0)                                     | 0.21<br>(-0.28 to<br>0.29)                       | 3.91<br>(1.48 to<br>6.22)                            | 2.26<br>(0.92 to<br>3.63)                            | -1.87<br>(-2.02 to<br>-1.73)                       |
| Honduras       | G6PD<br>deficiency          | 6<br>(5 to 8)                                     | 6<br>(5 to 8)                                     | -0.03<br>(-0.07 to<br>0.02)                      | 136.05<br>(104.87 to<br>168.52)                      | 63.27<br>(48.75 to<br>78.8)                          | -2.71<br>(-2.9 to<br>-2.53)                        |
| Honduras       | G6PD trait                  | 25<br>(22 to 27)                                  | 29<br>(26 to 32)                                  | 0.16<br>(0.12 to<br>0.2)                         | 527.63<br>(474.52 to<br>575.26)                      | 294.55<br>(265.11 to<br>322.72)                      | -2.14<br>(-2.2 to<br>-2.08)                        |
| Hungary        | Inherited<br>anemias        | 18<br>(16 to 20)                                  | 12<br>(11 to 14)                                  | -0.32<br>(-0.34 to<br>-0.3)                      | 170.38<br>(150.01 to<br>191.74)                      | 124.56<br>(109.69 to<br>140.57)                      | -0.95<br>(-1.13 to<br>-0.76)                       |
| Hungary        | Thalassemi<br>as            | 0<br>(0 to 0)                                     | 0<br>(0 to 0)                                     | -0.59<br>(-0.64 to<br>-0.52)                     | 0.92<br>(0.59 to<br>1.46)                            | 0.4<br>(0.27 to<br>0.64)                             | -2.42<br>(-2.62 to<br>-2.22)                       |
| Hungary        | Thalassemi<br>as trait      | 2<br>(2 to 3)                                     | 2<br>(1 to 2)                                     | -0.3<br>(-0.35 to<br>-0.25)                      | 21.94<br>(18.16 to<br>27.02)                         | 16.41<br>(13.73 to<br>19.81)                         | -0.69<br>(-0.9 to<br>-0.48)                        |
| Hungary        | Sickle<br>cell<br>disorders | 0<br>(0 to 0)                                     | 0<br>(0 to 0)                                     | -0.34<br>(-0.4 to<br>-0.29)                      | 0.09<br>(0.07 to<br>0.12)                            | 0.06<br>(0.05 to<br>0.08)                            | -1.12<br>(-1.29 to<br>-0.94)                       |
| Hungary        | Sickle<br>cell trait        | 2<br>(2 to 2)                                     | 1<br>(1 to 2)                                     | -0.34<br>(-0.36 to<br>-0.31)                     | 19.58<br>(16.95 to<br>22.58)                         | 13.94<br>(12 to<br>16.14)                            | -0.93<br>(-1.1 to<br>-0.76)                        |
| Hungary        | G6PD<br>deficiency          | 4<br>(3 to 5)                                     | 3<br>(2 to 4)                                     | -0.28<br>(-0.35 to<br>-0.21)                     | 41.48<br>(32.09 to<br>52.58)                         | 32.21<br>(24.89 to<br>40.32)                         | -1.49<br>(-1.83 to<br>-1.15)                       |
| Hungary        | G6PD trait                  | 9<br>(8 to 10)                                    | 6<br>(5 to 7)                                     | -0.34<br>(-0.34 to<br>-0.34)                     | 86.36<br>(76.03 to<br>96.92)                         | 61.54<br>(54.17 to<br>69.06)                         | -0.78<br>(-0.98 to<br>-0.57)                       |
| Iceland        | Inherited                   | 1                                                 | 1                                                 | -0.08                                            | 318.69                                               | 215.07                                               | -1.14                                              |

| Regions   | Causes                       | Cases in 1990<br>No.×103<br>(95% UI) | Cases in 2019<br>No.×103<br>(95% UI) | Change in absolute number<br>(%) | Rates in 1990 per 100000<br>(95% UI) | Rates in 2019 per 100000<br>(95% UI) | EAPC from 1990 and 2019<br>(95%CI) |
|-----------|------------------------------|--------------------------------------|--------------------------------------|----------------------------------|--------------------------------------|--------------------------------------|------------------------------------|
|           | <b>anemias</b>               | (1 to 1)                             | (1 to 1)                             | (−0.12 to −0.05)                 | (286.18 to 353.99)                   | (192.18 to 239.49)                   | (−1.3 to −0.98)                    |
| Iceland   | Thalassemi<br>as             | 0<br>(0 to 0)                        | 0<br>(0 to 0)                        | −0.15<br>(−0.25 to −0.03)        | 0.22<br>(0.15 to 0.3)                | 0.14<br>(0.1 to 0.19)                | −2.2<br>(−2.87 to −1.52)           |
| Iceland   | Thalassemi<br>as trait       | 0<br>(0 to 0)                        | 0<br>(0 to 0)                        | −0.07<br>(−0.12 to −0.01)        | 28.86<br>(24.8 to 32.99)             | 19.73<br>(17.15 to 22.56)            | −1.29<br>(−1.44 to −1.15)          |
| Iceland   | Sickle<br>cell disorders     | 0<br>(0 to 0)                        | 0<br>(0 to 0)                        | −0.12<br>(−0.22 to −0.02)        | 0.19<br>(0.13 to 0.27)               | 0.12<br>(0.08 to 0.17)               | −1.29<br>(−1.47 to −1.1)           |
| Iceland   | Sickle<br>cell trait         | 0<br>(0 to 0)                        | 0<br>(0 to 0)                        | −0.1<br>(−0.15 to −0.05)         | 35.53<br>(28.99 to 42.8)             | 23.58<br>(19.43 to 28.11)            | −1.19<br>(−1.36 to −1.01)          |
| Iceland   | G6PD<br>deficiency           | 0<br>(0 to 0)                        | 0<br>(0 to 0)                        | −0.04<br>(−0.08 to 0.02)         | 48.1<br>(36.88 to 59.7)              | 33.95<br>(26.05 to 42.56)            | −1<br>(−1.17 to −0.83)             |
| Iceland   | G6PD trait                   | 1<br>(0 to 1)                        | 0<br>(0 to 1)                        | −0.09<br>(−0.13 to −0.05)        | 205.8<br>(184.26 to 227.8)           | 137.55<br>(122.51 to 152.07)         | −1.14<br>(−1.31 to −0.96)          |
| India     | <b>Inherited<br/>anemias</b> | 9437<br>(8826 to 10149)              | 10728<br>(10107 to 11424)            | 0.14<br>(0.12 to 0.15)           | 1102.97<br>(1031.63 to 1186.22)      | 771.38<br>(726.72 to 821.43)         | −1.64<br>(−1.97 to −1.31)          |
| India     | Thalassemi<br>as             | 14<br>(10 to 20)                     | 22<br>(15 to 32)                     | 0.55<br>(0.39 to 0.7)            | 1.68<br>(1.2 to 2.34)                | 1.6<br>(1.1 to 2.3)                  | 0.63<br>(0.07 to 1.19)             |
| India     | Thalassemi<br>as trait       | 1307<br>(1101 to 1549)               | 1516<br>(1275 to 1805)               | 0.16<br>(0.12 to 0.2)            | 152.76<br>(128.68 to 181.04)         | 109.03<br>(91.68 to 129.79)          | −0.79<br>(−1.08 to −0.51)          |
| India     | Sickle<br>cell disorders     | 112<br>(75 to 163)                   | 124<br>(83 to 179)                   | 0.11<br>(0.07 to 0.16)           | 13.06<br>(8.79 to 19.01)             | 8.94<br>(5.98 to 12.88)              | −1.42<br>(−1.76 to −1.09)          |
| India     | Sickle<br>cell trait         | 3161<br>(2639 to 3778)               | 3131<br>(2613 to 3717)               | −0.01<br>(−0.03 to 0.01)         | 369.51<br>(308.39 to 441.51)         | 225.15<br>(187.87 to 267.3)          | −1.76<br>(−1.95 to −1.58)          |
| India     | G6PD<br>deficiency           | 1240<br>(1190 to 1286)               | 1956<br>(1873 to 2034)               | 0.58<br>(0.53 to 0.61)           | 144.94<br>(139.13 to 150.3)          | 140.66<br>(134.65 to 146.27)         | −1.75<br>(−2.56 to −0.93)          |
| India     | G6PD trait                   | 3602<br>(3543 to 3654)               | 3978<br>(3914 to 4034)               | 0.1<br>(0.09 to 0.11)            | 421.01<br>(414.16 to 427.11)         | 286.01<br>(281.41 to 290.09)         | −1.76<br>(−2.12 to −1.41)          |
| Indonesia | <b>Inherited<br/>anemias</b> | 1311<br>(1261 to                     | 878<br>(838 to                       | −0.33<br>(−0.34 to               | 707.23<br>(680 to                    | 338.38<br>(323.08 to                 | −2.52<br>(−2.72 to                 |

| Regions                    | Causes                | Cases in 1990<br>No.×103<br>(95% UI) | Cases in 2019<br>No.×103<br>(95% UI) | Change in absolute number<br>(%) | Rates in 1990 per 100000<br>(95% UI) | Rates in 2019 per 100000<br>(95% UI) | EAPC from 1990 and 2019<br>(95%CI) |
|----------------------------|-----------------------|--------------------------------------|--------------------------------------|----------------------------------|--------------------------------------|--------------------------------------|------------------------------------|
|                            |                       | 1367)                                | 923)                                 | −0.32)                           | 737.38)                              | 355.6)                               | −2.32)                             |
| Indonesia                  | Thalassemi as         | 9<br>(7 to 12)                       | 6<br>(5 to 8)                        | −0.34<br>(−0.38 to −0.29)        | 4.94<br>(3.73 to 6.64)               | 2.33<br>(1.76 to 3.11)               | −2.46<br>(−2.61 to −2.32)          |
| Indonesia                  | Thalassemi as trait   | 297<br>(254 to 346)                  | 240<br>(205 to 279)                  | −0.19<br>(−0.21 to −0.18)        | 160.48<br>(137.03 to 186.44)         | 92.31<br>(78.98 to 107.59)           | −1.78<br>(−1.93 to −1.63)          |
| Indonesia                  | Sickle cell disorders | 0<br>(0 to 0)                        | 0<br>(0 to 0)                        | −0.18<br>(−0.22 to −0.12)        | 0.02<br>(0.02 to 0.03)               | 0.01<br>(0.01 to 0.02)               | −1.75<br>(−1.89 to −1.61)          |
| Indonesia                  | Sickle cell trait     | 26<br>(22 to 31)                     | 21<br>(18 to 25)                     | −0.19<br>(−0.21 to −0.15)        | 14.23<br>(11.95 to 16.84)            | 8.24<br>(6.91 to 9.77)               | −1.76<br>(−1.91 to −1.62)          |
| Indonesia                  | G6PD deficiency       | 329<br>(316 to 341)                  | 161<br>(153 to 168)                  | −0.51<br>(−0.53 to −0.5)         | 177.55<br>(170.56 to 184.21)         | 62.01<br>(59.14 to 64.75)            | −3.72<br>(−4.3 to −3.13)           |
| Indonesia                  | G6PD trait            | 649<br>(637 to 659)                  | 450<br>(441 to 458)                  | −0.31<br>(−0.31 to −0.3)         | 350<br>(343.62 to 355.64)            | 173.47<br>(170.06 to 176.6)          | −2.45<br>(−2.71 to −2.2)           |
| Iran (Islamic Republic of) | Inherited anemias     | 582<br>(553 to 615)                  | 498<br>(477 to 523)                  | −0.14<br>(−0.16 to −0.13)        | 993.37<br>(944.92 to 1049.98)        | 590.88<br>(566.09 to 620.96)         | −1.38<br>(−1.55 to −1.2)           |
| Iran (Islamic Republic of) | Thalassemi as         | 2<br>(1 to 3)                        | 2<br>(1 to 2)                        | −0.19<br>(−0.22 to −0.16)        | 3.23<br>(2.14 to 4.86)               | 1.81<br>(1.22 to 2.69)               | −1.46<br>(−1.67 to −1.24)          |
| Iran (Islamic Republic of) | Thalassemi as trait   | 117<br>(98 to 143)                   | 95<br>(79 to 114)                    | −0.19<br>(−0.21 to −0.18)        | 200.55<br>(166.63 to 243.59)         | 112.35<br>(94.05 to 135.31)          | −1.45<br>(−1.66 to −1.23)          |
| Iran (Islamic Republic of) | Sickle cell disorders | 4<br>(3 to 5)                        | 2<br>(2 to 3)                        | −0.49<br>(−0.5 to −0.46)         | 6.59<br>(5.07 to 8.59)               | 2.35<br>(1.82 to 3.06)               | −3.78<br>(−4.15 to −3.4)           |
| Iran (Islamic Republic of) | Sickle cell trait     | 153<br>(133 to 174)                  | 96<br>(84 to 110)                    | −0.37<br>(−0.38 to −0.36)        | 260.91<br>(228.04 to 297.49)         | 113.86<br>(99.39 to 130.12)          | −2.69<br>(−2.84 to −2.55)          |
| Iran (Islamic Republic of) | G6PD deficiency       | 100<br>(96 to 104)                   | 89<br>(85 to 93)                     | −0.12<br>(−0.15 to −0.09)        | 171.56<br>(164.76 to 177.97)         | 105.21<br>(100.25 to 110.03)         | −1<br>(−1.42 to −0.58)             |

| <b>Regions</b>                | <b>Causes</b>         | <b>Cases in<br/>1990<br/>No.×103<br/>(95% UI)</b> | <b>Cases in<br/>2019<br/>No.×103<br/>(95% UI)</b> | <b>Change in<br/>absolute<br/>number<br/>(%)</b> | <b>Rates in<br/>1990 per<br/>100000<br/>(95% UI)</b> | <b>Rates in<br/>2019 per<br/>100000<br/>(95% UI)</b> | <b>EAPC<br/>from 1990<br/>and 2019<br/>(95%CI)</b> |
|-------------------------------|-----------------------|---------------------------------------------------|---------------------------------------------------|--------------------------------------------------|------------------------------------------------------|------------------------------------------------------|----------------------------------------------------|
| Iran<br>(Islamic Republic of) | G6PD trait            | 205<br>(201 to 209)                               | 215<br>(211 to 219)                               | 0.05<br>(0.03 to 0.06)                           | 350.53<br>(344.18 to 356.19)                         | 255.31<br>(250.84 to 259.38)                         | -0.76<br>(-0.99 to -0.52)                          |
| Iraq                          | Inherited anemias     | 265<br>(242 to 289)                               | 351<br>(322 to 383)                               | 0.33<br>(0.3 to 0.35)                            | 1506.19<br>(1376.53 to 1643.71)                      | 834.32<br>(763.61 to 908.79)                         | -2.2<br>(-2.28 to -2.13)                           |
| Iraq                          | Thalassemias          | 0<br>(0 to 1)                                     | 1<br>(0 to 1)                                     | 0.39<br>(0.26 to 0.53)                           | 2.38<br>(1.85 to 3.06)                               | 1.38<br>(1.08 to 1.77)                               | -2.19<br>(-2.28 to -2.09)                          |
| Iraq                          | Thalassemias trait    | 37<br>(33 to 42)                                  | 51<br>(45 to 57)                                  | 0.37<br>(0.31 to 0.44)                           | 210.54<br>(187.38 to 236.34)                         | 120.75<br>(107.32 to 136.13)                         | -2.2<br>(-2.29 to -2.11)                           |
| Iraq                          | Sickle cell disorders | 2<br>(1 to 2)                                     | 2<br>(2 to 2)                                     | 0.29<br>(0.21 to 0.38)                           | 8.89<br>(7.37 to 10.86)                              | 4.81<br>(3.95 to 5.86)                               | -2.12<br>(-2.36 to -1.88)                          |
| Iraq                          | Sickle cell trait     | 64<br>(59 to 71)                                  | 84<br>(76 to 92)                                  | 0.3<br>(0.25 to 0.34)                            | 365.44<br>(334.34 to 401.87)                         | 198.4<br>(180.77 to 218.41)                          | -2.23<br>(-2.37 to -2.1)                           |
| Iraq                          | G6PD deficiency       | 46<br>(35 to 57)                                  | 61<br>(47 to 75)                                  | 0.32<br>(0.25 to 0.4)                            | 260.08<br>(200.54 to 321.87)                         | 143.64<br>(111.17 to 178.34)                         | -1.98<br>(-2.11 to -1.86)                          |
| Iraq                          | G6PD trait            | 116<br>(105 to 125)                               | 154<br>(140 to 167)                               | 0.33<br>(0.3 to 0.38)                            | 658.87<br>(598.31 to 711.92)                         | 365.33<br>(331.54 to 396.56)                         | -2.28<br>(-2.36 to -2.19)                          |
| Ireland                       | Inherited anemias     | 9<br>(8 to 10)                                    | 11<br>(10 to 12)                                  | 0.14<br>(0.11 to 0.18)                           | 261.07<br>(234.01 to 289.78)                         | 218.64<br>(195.8 to 242.68)                          | -0.2<br>(-0.5 to 0.1)                              |
| Ireland                       | Thalassemias          | 0<br>(0 to 0)                                     | 0<br>(0 to 0)                                     | 0.09<br>(-0.06 to 0.26)                          | 0.18<br>(0.13 to 0.25)                               | 0.15<br>(0.1 to 0.2)                                 | -1.16<br>(-2.02 to -0.29)                          |
| Ireland                       | Thalassemias trait    | 1<br>(1 to 1)                                     | 1<br>(1 to 1)                                     | 0.17<br>(0.1 to 0.25)                            | 23.3<br>(20.34 to 26.63)                             | 20.07<br>(17.21 to 23.02)                            | -0.24<br>(-0.62 to 0.15)                           |
| Ireland                       | Sickle cell disorders | 0<br>(0 to 0)                                     | 0<br>(0 to 0)                                     | -0.07<br>(-0.18 to 0.04)                         | 0.25<br>(0.18 to 0.35)                               | 0.17<br>(0.13 to 0.23)                               | -1.67<br>(-2.09 to -1.25)                          |
| Ireland                       | Sickle cell trait     | 1<br>(1 to 1)                                     | 1<br>(1 to 1)                                     | 0<br>(-0.07 to 0.07)                             | 32.75<br>(26.92 to 39.96)                            | 24.11<br>(19.78 to 29.05)                            | -1.13<br>(-1.42 to -0.85)                          |
| Ireland                       | G6PD deficiency       | 1<br>(1 to 2)                                     | 2<br>(1 to 2)                                     | 0.21<br>(0.17 to 0.26)                           | 39.66<br>(30.34 to 49.36)                            | 35.22<br>(27.05 to 43.95)                            | 0.05<br>(-0.23 to 0.34)                            |

| <b>Regions</b> | <b>Causes</b>               | <b>Cases in<br/>1990<br/>No.×103<br/>(95% UI)</b> | <b>Cases in<br/>2019<br/>No.×103<br/>(95% UI)</b> | <b>Change in<br/>absolute<br/>number<br/>(%)</b> | <b>Rates in<br/>1990 per<br/>100000<br/>(95% UI)</b> | <b>Rates in<br/>2019 per<br/>100000<br/>(95% UI)</b> | <b>EAPC<br/>from 1990<br/>and 2019<br/>(95%CI)</b> |
|----------------|-----------------------------|---------------------------------------------------|---------------------------------------------------|--------------------------------------------------|------------------------------------------------------|------------------------------------------------------|----------------------------------------------------|
| Ireland        | G6PD trait                  | 6<br>(5 to 7)                                     | 7<br>(6 to 8)                                     | 0.15<br>(0.1 to<br>0.2)                          | 164.92<br>(147.61 to<br>180.99)                      | 138.92<br>(124.26 to<br>153.91)                      | -0.08<br>(-0.41 to<br>0.26)                        |
| Israel         | Inherited<br>anemias        | 22<br>(20 to 24)                                  | 43<br>(38 to 49)                                  | 0.96<br>(0.89 to<br>1.03)                        | 443.23<br>(395.23 to<br>492.85)                      | 463.55<br>(410.22 to<br>521.67)                      | 0.19<br>(0.1 to<br>0.28)                           |
| Israel         | Thalassemi<br>as            | 0<br>(0 to 0)                                     | 0<br>(0 to 0)                                     | 0.74<br>(0.46 to<br>1.01)                        | 0.24<br>(0.16 to<br>0.34)                            | 0.22<br>(0.15 to<br>0.32)                            | -1.29<br>(-2.22 to<br>-0.34)                       |
| Israel         | Thalassemi<br>as trait      | 1<br>(1 to 1)                                     | 2<br>(2 to 3)                                     | 0.92<br>(0.79 to<br>1.05)                        | 25.05<br>(21.66 to<br>28.67)                         | 25.68<br>(22.01 to<br>29.75)                         | -0.25<br>(-0.54 to<br>0.05)                        |
| Israel         | Sickle<br>cell<br>disorders | 0<br>(0 to 0)                                     | 0<br>(0 to 0)                                     | 0.35<br>(0.1 to<br>0.63)                         | 1.25<br>(0.95 to<br>1.6)                             | 0.9<br>(0.64 to<br>1.27)                             | -1.1<br>(-1.4 to<br>-0.8)                          |
| Israel         | Sickle<br>cell trait        | 5<br>(4 to 5)                                     | 7<br>(6 to 9)                                     | 0.55<br>(0.38 to<br>0.73)                        | 93.25<br>(80.22 to<br>106.51)                        | 77.16<br>(62.36 to<br>93.15)                         | -0.63<br>(-0.81 to<br>-0.45)                       |
| Israel         | G6PD<br>deficiency          | 5<br>(4 to 6)                                     | 11<br>(9 to 14)                                   | 1.19<br>(1.05 to<br>1.37)                        | 101.27<br>(78.3 to<br>125.24)                        | 118.37<br>(92.02 to<br>148.2)                        | 0.43<br>(0.26 to<br>0.61)                          |
| Israel         | G6PD trait                  | 11<br>(10 to 12)                                  | 22<br>(20 to 25)                                  | 1.04<br>(0.97 to<br>1.12)                        | 222.17<br>(199.27 to<br>243.68)                      | 241.21<br>(216.59 to<br>265.51)                      | 0.43<br>(0.35 to<br>0.52)                          |
| Italy          | Inherited<br>anemias        | 229<br>(216 to<br>243)                            | 141<br>(135 to<br>148)                            | -0.38<br>(-0.41 to<br>-0.36)                     | 403.05<br>(379.9 to<br>428.35)                       | 233.67<br>(223.14 to<br>245.54)                      | -1.82<br>(-2.13 to<br>-1.5)                        |
| Italy          | Thalassemi<br>as            | 1<br>(1 to 2)                                     | 1<br>(1 to 1)                                     | -0.24<br>(-0.28 to<br>-0.19)                     | 2.59<br>(1.88 to<br>3.45)                            | 1.85<br>(1.38 to<br>2.4)                             | -0.81<br>(-1.05 to<br>-0.57)                       |
| Italy          | Thalassemi<br>as trait      | 53<br>(46 to 61)                                  | 41<br>(35 to 47)                                  | -0.23<br>(-0.24 to<br>-0.21)                     | 92.97<br>(80.17 to<br>107.14)                        | 67.51<br>(58.76 to<br>77.51)                         | -0.88<br>(-1.09 to<br>-0.67)                       |
| Italy          | Sickle<br>cell<br>disorders | 7<br>(4 to 10)                                    | 0<br>(0 to 0)                                     | -0.98<br>(-0.98 to<br>-0.98)                     | 11.73<br>(7.9 to<br>16.78)                           | 0.21<br>(0.16 to<br>0.28)                            | -13.58<br>(-15.82 to<br>-11.29)                    |
| Italy          | Sickle<br>cell trait        | 55<br>(47 to 63)                                  | 11<br>(10 to 13)                                  | -0.79<br>(-0.81 to<br>-0.77)                     | 96.1<br>(82.34 to<br>111.64)                         | 18.64<br>(16.57 to<br>21.09)                         | -5.38<br>(-6.14 to<br>-4.61)                       |
| Italy          | G6PD<br>deficiency          | 27<br>(26 to 28)                                  | 23<br>(22 to 24)                                  | -0.13<br>(-0.16 to<br>-0.11)                     | 47.16<br>(45.36 to<br>48.95)                         | 38.6<br>(36.78 to<br>40.24)                          | -1.75<br>(-2.78 to<br>-0.71)                       |
| Italy          | G6PD trait                  | 87                                                | 64                                                | -0.26                                            | 152.5                                                | 106.87                                               | -1.25                                              |

| Regions | Causes                      | Cases in<br>1990<br>No.×103<br>(95% UI) | Cases in<br>2019<br>No.×103<br>(95% UI) | Change in<br>absolute<br>number<br>(%) | Rates in<br>1990 per<br>100000<br>(95% UI) | Rates in<br>2019 per<br>100000<br>(95% UI) | EAPC<br>from 1990<br>and 2019<br>(95%CI) |
|---------|-----------------------------|-----------------------------------------|-----------------------------------------|----------------------------------------|--------------------------------------------|--------------------------------------------|------------------------------------------|
|         |                             | (85 to 88)                              | (63 to 66)                              | (−0.26 to<br>−0.25)                    | (149.99 to<br>154.96)                      | (104.77 to<br>108.85)                      | (−1.51 to<br>−0.98)                      |
| Jamaica | Inherited<br>anemias        | 19<br>(17 to 21)                        | 12<br>(11 to 14)                        | −0.36<br>(−0.38 to<br>−0.33)           | 816.28<br>(735.19 to<br>897.58)            | 439.65<br>(393.34 to<br>490.25)            | −2.2<br>(−2.32 to<br>−2.07)              |
| Jamaica | Thalassemi<br>as            | 0<br>(0 to 0)                           | 0<br>(0 to 0)                           | 0<br>(−0.37 to<br>0.85)                | 0.01<br>(0.01 to<br>0.02)                  | 0.01<br>(0.01 to<br>0.02)                  | −0.74<br>(−0.83 to<br>−0.65)             |
| Jamaica | Thalassemi<br>as trait      | 0<br>(0 to 0)                           | 0<br>(0 to 0)                           | −0.26<br>(−0.37 to<br>−0.09)           | 10.01<br>(8.1 to<br>12.11)                 | 6.25<br>(5.07 to<br>7.45)                  | −1.69<br>(−1.78 to<br>−1.61)             |
| Jamaica | Sickle<br>cell<br>disorders | 0<br>(0 to 0)                           | 0<br>(0 to 0)                           | −0.39<br>(−0.47 to<br>−0.29)           | 13.61<br>(12.46 to<br>14.87)               | 7.02<br>(5.72 to<br>8.51)                  | −2.25<br>(−2.38 to<br>−2.13)             |
| Jamaica | Sickle<br>cell trait        | 6<br>(6 to 7)                           | 4<br>(3 to 4)                           | −0.38<br>(−0.43 to<br>−0.32)           | 262.47<br>(248.45 to<br>276.82)            | 136.78<br>(121.85 to<br>153.36)            | −2.3<br>(−2.41 to<br>−2.2)               |
| Jamaica | G6PD<br>deficiency          | 5<br>(4 to 6)                           | 3<br>(3 to 4)                           | −0.35<br>(−0.4 to<br>−0.28)            | 210.91<br>(162.27 to<br>260.39)            | 115.65<br>(89.02 to<br>143.23)             | −2.16<br>(−2.29 to<br>−2.02)             |
| Jamaica | G6PD trait                  | 8<br>(7 to 8)                           | 5<br>(4 to 5)                           | −0.35<br>(−0.35 to<br>−0.35)           | 319.26<br>(287.2 to<br>349.09)             | 173.94<br>(156.72 to<br>190.13)            | −2.15<br>(−2.29 to<br>−2.01)             |
| Japan   | Inherited<br>anemias        | 85<br>(79 to 91)                        | 64<br>(60 to 69)                        | −0.24<br>(−0.29 to<br>−0.2)            | 67.29<br>(62.68 to<br>72.25)               | 50.28<br>(46.7 to<br>54.08)                | −0.9<br>(−1.2 to<br>−0.61)               |
| Japan   | Thalassemi<br>as            | 1<br>(1 to 1)                           | 1<br>(1 to 1)                           | 0.2<br>(0.05 to<br>0.39)               | 0.6<br>(0.44 to<br>0.86)                   | 0.71<br>(0.51 to 1)                        | 0.64<br>(−0.08 to<br>1.36)               |
| Japan   | Thalassemi<br>as trait      | 24<br>(18 to 30)                        | 22<br>(18 to 26)                        | −0.07<br>(−0.25 to<br>0.08)            | 18.82<br>(14.38 to<br>23.58)               | 17.26<br>(13.81 to<br>20.66)               | 0.01<br>(−0.57 to<br>0.6)                |
| Japan   | Sickle<br>cell<br>disorders | 0<br>(0 to 0)                           | 0<br>(0 to 0)                           | −0.2<br>(−0.52 to<br>0.14)             | 0<br>(0 to 0.01)                           | 0<br>(0 to 0)                              | −0.62<br>(−0.89 to<br>−0.34)             |
| Japan   | Sickle<br>cell trait        | 3<br>(2 to 4)                           | 2<br>(2 to 3)                           | −0.19<br>(−0.25 to<br>−0.08)           | 2.26<br>(1.32 to<br>3.2)                   | 1.79<br>(1.18 to<br>2.43)                  | −0.61<br>(−0.74 to<br>−0.49)             |
| Japan   | G6PD<br>deficiency          | 4<br>(3 to 4)                           | 3<br>(3 to 3)                           | −0.08<br>(−0.1 to<br>−0.06)            | 2.88<br>(2.76 to<br>3.02)                  | 2.61<br>(2.48 to<br>2.74)                  | −0.77<br>(−1.04 to<br>−0.5)              |
| Japan   | G6PD trait                  | 54<br>(52 to 55)                        | 36<br>(35 to 37)                        | −0.34<br>(−0.35 to                     | 42.73<br>(41.64 to                         | 27.92<br>(27.1 to                          | −1.4<br>(−1.59 to                        |

| Regions    | Causes                      | Cases in<br>1990<br>No.×103<br>(95% UI) | Cases in<br>2019<br>No.×103<br>(95% UI) | Change in<br>absolute<br>number<br>(%) | Rates in<br>1990 per<br>100000<br>(95% UI) | Rates in<br>2019 per<br>100000<br>(95% UI) | EAPC<br>from 1990<br>and 2019<br>(95%CI) |
|------------|-----------------------------|-----------------------------------------|-----------------------------------------|----------------------------------------|--------------------------------------------|--------------------------------------------|------------------------------------------|
|            |                             |                                         |                                         | -0.32)                                 | 43.88)                                     | 28.74)                                     | -1.21)                                   |
| Jordan     | Inherited<br>anemias        | 49<br>(44 to 53)                        | 83<br>(76 to 90)                        | 0.7<br>(0.66 to<br>0.74)               | 1286.87<br>(1177.41 to<br>1399.85)         | 709.25<br>(649.32 to<br>772.35)            | -1.97<br>(-2.05 to<br>-1.9)              |
| Jordan     | Thalassemi<br>as            | 0<br>(0 to 0)                           | 0<br>(0 to 0)                           | 0.8<br>(0.62 to 1)                     | 2.23<br>(1.66 to<br>2.93)                  | 1.3<br>(0.97 to<br>1.7)                    | -1.82<br>(-1.89 to<br>-1.75)             |
| Jordan     | Thalassemi<br>as trait      | 7<br>(6 to 8)                           | 13<br>(11 to 15)                        | 0.81<br>(0.73 to<br>0.9)               | 189.38<br>(165.4 to<br>215.87)             | 111.17<br>(97.39 to<br>126.59)             | -1.77<br>(-1.84 to<br>-1.7)              |
| Jordan     | Sickle<br>cell<br>disorders | 0<br>(0 to 0)                           | 0<br>(0 to 0)                           | 0.68<br>(0.55 to<br>0.81)              | 4<br>(3.07 to<br>5.03)                     | 2.18<br>(1.68 to<br>2.75)                  | -2.67<br>(-2.94 to<br>-2.39)             |
| Jordan     | Sickle<br>cell trait        | 9<br>(8 to 10)                          | 15<br>(13 to 17)                        | 0.71<br>(0.64 to<br>0.77)              | 229.66<br>(201.6 to<br>258.21)             | 127.08<br>(112.29 to<br>143.05)            | -2.27<br>(-2.41 to<br>-2.12)             |
| Jordan     | G6PD<br>deficiency          | 8<br>(6 to 10)                          | 13<br>(10 to 16)                        | 0.61<br>(0.51 to<br>0.71)              | 207.71<br>(162.01 to<br>257.59)            | 108.63<br>(84.38 to<br>136.44)             | -2.05<br>(-2.16 to<br>-1.94)             |
| Jordan     | G6PD trait                  | 25<br>(23 to 27)                        | 42<br>(38 to 45)                        | 0.69<br>(0.64 to<br>0.74)              | 653.9<br>(598.18 to<br>704.27)             | 358.9<br>(328.01 to<br>387.13)             | -1.9<br>(-1.99 to<br>-1.81)              |
| Kazakhstan | Inherited<br>anemias        | 51<br>(45 to 56)                        | 51<br>(45 to 56)                        | -0.01<br>(-0.03 to<br>0.01)            | 311.51<br>(277.64 to<br>345.02)            | 275.08<br>(246.24 to<br>305.97)            | 0.74<br>(0.27 to<br>1.2)                 |
| Kazakhstan | Thalassemi<br>as            | 0<br>(0 to 1)                           | 0<br>(0 to 0)                           | -0.21<br>(-0.3 to<br>-0.1)             | 2.31<br>(1.65 to<br>3.18)                  | 1.62<br>(1.17 to<br>2.27)                  | -0.06<br>(-0.53 to<br>0.41)              |
| Kazakhstan | Thalassemi<br>as trait      | 17<br>(14 to 21)                        | 17<br>(14 to 21)                        | 0<br>(-0.06 to<br>0.07)                | 103.84<br>(86.12 to<br>126)                | 92.46<br>(76.8 to<br>113.74)               | 0.74<br>(0.28 to<br>1.21)                |
| Kazakhstan | Sickle<br>cell<br>disorders | 0<br>(0 to 0)                           | 0<br>(0 to 0)                           | -0.01<br>(-0.21 to<br>0.11)            | 0.01<br>(0.01 to<br>0.02)                  | 0.01<br>(0.01 to<br>0.02)                  | 0.75<br>(0.28 to<br>1.22)                |
| Kazakhstan | Sickle<br>cell trait        | 2<br>(1 to 2)                           | 2<br>(1 to 2)                           | -0.01<br>(-0.12 to<br>0.06)            | 9.8<br>(7.74 to<br>12.25)                  | 8.63<br>(6.76 to<br>10.75)                 | 0.74<br>(0.28 to<br>1.21)                |
| Kazakhstan | G6PD<br>deficiency          | 5<br>(4 to 6)                           | 5<br>(4 to 6)                           | 0.01<br>(-0.03 to<br>0.08)             | 29.09<br>(22.6 to<br>36.35)                | 26.19<br>(20.18 to<br>33.08)               | 0.87<br>(0.39 to<br>1.35)                |
| Kazakhstan | G6PD trait                  | 27<br>(24 to 30)                        | 27<br>(24 to 30)                        | -0.01<br>(-0.01 to<br>-0.01)           | 166.46<br>(148.14 to<br>185.56)            | 146.16<br>(130.08 to<br>162.93)            | 0.72<br>(0.26 to<br>1.19)                |

| Regions  | Causes                | Cases in 1990<br>No.×103<br>(95% UI) | Cases in 2019<br>No.×103<br>(95% UI) | Change in absolute number<br>(%) | Rates in 1990 per 100000<br>(95% UI) | Rates in 2019 per 100000<br>(95% UI) | EAPC from 1990 and 2019<br>(95%CI) |
|----------|-----------------------|--------------------------------------|--------------------------------------|----------------------------------|--------------------------------------|--------------------------------------|------------------------------------|
| Kenya    | Inherited anemias     | 574<br>(533 to 618)                  | 692<br>(643 to 746)                  | 0.21<br>(0.2 to 0.22)            | 2475.46<br>(2298.91 to 2665.59)      | 1378.44<br>(1279.25 to 1485.61)      | -1.99<br>(-2.12 to -1.86)          |
| Kenya    | Thalassemias          | 0<br>(0 to 0)                        | 0<br>(0 to 0)                        | 1.93<br>(1.65 to 2.37)           | 0.09<br>(0.05 to 0.13)               | 0.12<br>(0.07 to 0.18)               | 0.75<br>(0.55 to 0.95)             |
| Kenya    | Thalassemias trait    | 6<br>(5 to 7)                        | 11<br>(9 to 13)                      | 0.82<br>(0.7 to 0.95)            | 25.83<br>(20.72 to 31.31)            | 21.7<br>(17.17 to 26.49)             | -0.73<br>(-0.84 to -0.61)          |
| Kenya    | Sickle cell disorders | 19<br>(14 to 27)                     | 24<br>(17 to 33)                     | 0.22<br>(0.18 to 0.26)           | 83.81<br>(58.35 to 116.76)           | 47.06<br>(33.47 to 64.81)            | -1.7<br>(-1.82 to -1.59)           |
| Kenya    | Sickle cell trait     | 234<br>(201 to 269)                  | 299<br>(260 to 344)                  | 0.28<br>(0.26 to 0.3)            | 1007.62<br>(866.5 to 1158.24)        | 596.17<br>(516.72 to 684.21)         | -1.67<br>(-1.77 to -1.58)          |
| Kenya    | G6PD deficiency       | 108<br>(103 to 113)                  | 128<br>(122 to 133)                  | 0.18<br>(0.17 to 0.21)           | 466.68<br>(445.04 to 486.36)         | 255.19<br>(243.77 to 265.43)         | -2.29<br>(-2.42 to -2.15)          |
| Kenya    | G6PD trait            | 207<br>(204 to 209)                  | 230<br>(226 to 234)                  | 0.11<br>(0.11 to 0.12)           | 891.43<br>(879.12 to 902.79)         | 458.2<br>(450.57 to 465.47)          | -2.31<br>(-2.53 to -2.09)          |
| Kiribati | Inherited anemias     | 1<br>(1 to 1)                        | 1<br>(1 to 1)                        | 0.29<br>(0.25 to 0.33)           | 769.72<br>(683.21 to 859.31)         | 620.91<br>(551.89 to 692.42)         | -0.51<br>(-0.73 to -0.28)          |
| Kiribati | Thalassemias          | 0<br>(0 to 0)                        | 0<br>(0 to 0)                        | 0.05<br>(-0.08 to 0.18)          | 4.9<br>(2.69 to 7.37)                | 3.23<br>(1.78 to 4.81)               | -0.07<br>(-1.06 to 0.93)           |
| Kiribati | Thalassemias trait    | 0<br>(0 to 0)                        | 0<br>(0 to 0)                        | 0.14<br>(0.07 to 0.2)            | 132.35<br>(101.74 to 159.97)         | 93.84<br>(71.51 to 113.58)           | -0.52<br>(-0.95 to -0.09)          |
| Kiribati | Sickle cell disorders | 0<br>(0 to 0)                        | 0<br>(0 to 0)                        | 0.24<br>(0.16 to 1.48)           | 0<br>(0 to 0.01)                     | 0<br>(0 to 0)                        | -0.68<br>(-0.86 to -0.5)           |
| Kiribati | Sickle cell trait     | 0<br>(0 to 0)                        | 0<br>(0 to 0)                        | 0.21<br>(0.16 to 0.82)           | 4.96<br>(2.11 to 7.48)               | 3.75<br>(1.58 to 6.36)               | -0.78<br>(-0.93 to -0.63)          |
| Kiribati | G6PD deficiency       | 0<br>(0 to 0)                        | 0<br>(0 to 0)                        | 0.42<br>(0.32 to 0.52)           | 157.56<br>(121.17 to 198.34)         | 139.64<br>(108.13 to 175.78)         | -0.26<br>(-0.53 to 0)              |
| Kiribati | G6PD trait            | 0<br>(0 to 0)                        | 0<br>(0 to 0)                        | 0.3<br>(0.25 to 0.34)            | 469.94<br>(422.35 to 517.13)         | 380.46<br>(345.3 to 412.73)          | -0.6<br>(-0.78 to -0.42)           |
| Kuwait   | Inherited             | 9                                    | 14                                   | 0.55                             | 526.25                               | 323.96                               | -1.85                              |



| Regions    | Causes                       | Cases in 1990<br>No.×103<br>(95% UI) | Cases in 2019<br>No.×103<br>(95% UI) | Change in absolute number (%) | Rates in 1990 per 100000<br>(95% UI) | Rates in 2019 per 100000<br>(95% UI) | EAPC from 1990 and 2019<br>(95%CI) |
|------------|------------------------------|--------------------------------------|--------------------------------------|-------------------------------|--------------------------------------|--------------------------------------|------------------------------------|
|            | <b>anemias</b>               | (8 to 10)                            | (13 to 16)                           | (0.52 to 0.59)                | (475.09 to 581.09)                   | (292.31 to 357.94)                   | (−2.02 to −1.69)                   |
| Kuwait     | Thalassemi<br>as             | 0<br>(0 to 0)                        | 0<br>(0 to 0)                        | 0.82<br>(0.62 to 1.05)        | 0.31<br>(0.21 to 0.43)               | 0.22<br>(0.16 to 0.3)                | −1.23<br>(−1.47 to −0.99)          |
| Kuwait     | Thalassemi<br>as trait       | 1<br>(1 to 1)                        | 2<br>(1 to 2)                        | 0.67<br>(0.58 to 0.75)        | 57.39<br>(48.56 to 68.19)            | 38.01<br>(32.47 to 44.8)             | −1.49<br>(−1.73 to −1.25)          |
| Kuwait     | Sickle<br>cell disorders     | 0<br>(0 to 0)                        | 0<br>(0 to 0)                        | 0.55<br>(0.44 to 0.66)        | 1.7<br>(1.34 to 2.13)                | 1.05<br>(0.82 to 1.32)               | −1.69<br>(−1.93 to −1.45)          |
| Kuwait     | Sickle<br>cell trait         | 2<br>(2 to 2)                        | 3<br>(3 to 4)                        | 0.54<br>(0.48 to 0.59)        | 119.52<br>(106.46 to 133.77)         | 73<br>(65.04 to 81.8)                | −1.72<br>(−1.96 to −1.48)          |
| Kuwait     | G6PD<br>deficiency           | 2<br>(1 to 2)                        | 3<br>(2 to 3)                        | 0.54<br>(0.48 to 0.63)        | 97.7<br>(75.93 to 122.06)            | 59.75<br>(46.19 to 74.51)            | −1.39<br>(−1.65 to −1.13)          |
| Kuwait     | G6PD trait                   | 4<br>(4 to 5)                        | 7<br>(6 to 7)                        | 0.53<br>(0.47 to 0.59)        | 249.63<br>(222.95 to 274.46)         | 151.93<br>(136 to 168.5)             | −2.18<br>(−2.47 to −1.9)           |
| Kyrgyzstan | <b>Inherited<br/>anemias</b> | 18<br>(16 to 20)                     | 21<br>(19 to 24)                     | 0.19<br>(0.16 to 0.22)        | 405.46<br>(363.32 to 453.23)         | 328.12<br>(293.81 to 364.99)         | 0.14<br>(−0.29 to 0.57)            |
| Kyrgyzstan | Thalassemi<br>as             | 0<br>(0 to 0)                        | 0<br>(0 to 0)                        | 0<br>(−0.12 to 0.14)          | 3.06<br>(2.19 to 4.28)               | 2.08<br>(1.49 to 2.88)               | −0.46<br>(−0.9 to −0.02)           |
| Kyrgyzstan | Thalassemi<br>as trait       | 6<br>(5 to 7)                        | 7<br>(6 to 9)                        | 0.23<br>(0.15 to 0.32)        | 136.18<br>(113.86 to 166.1)          | 114.74<br>(95.55 to 139.2)           | 0.26<br>(−0.17 to 0.69)            |
| Kyrgyzstan | Sickle<br>cell disorders     | 0<br>(0 to 0)                        | 0<br>(0 to 0)                        | 0.17<br>(0 to 0.43)           | 0.02<br>(0.01 to 0.02)               | 0.01<br>(0.01 to 0.02)               | 0.12<br>(−0.31 to 0.56)            |
| Kyrgyzstan | Sickle<br>cell trait         | 1<br>(0 to 1)                        | 1<br>(1 to 1)                        | 0.17<br>(0.07 to 0.3)         | 12.8<br>(10.09 to 15.93)             | 10.23<br>(8.11 to 12.7)              | 0.1<br>(−0.33 to 0.54)             |
| Kyrgyzstan | G6PD<br>deficiency           | 2<br>(1 to 2)                        | 2<br>(2 to 3)                        | 0.19<br>(0.12 to 0.28)        | 38.13<br>(29.27 to 47.4)             | 31.01<br>(24.06 to 39.03)            | 0.22<br>(−0.24 to 0.67)            |
| Kyrgyzstan | G6PD trait                   | 10<br>(9 to 11)                      | 11<br>(10 to 12)                     | 0.16<br>(0.16 to 0.16)        | 215.27<br>(191.46 to 238.68)         | 170.05<br>(151.24 to 188.54)         | 0.06<br>(−0.36 to 0.49)            |

| <b>Regions</b>                            | <b>Causes</b>               | <b>Cases in<br/>1990<br/>No.×103<br/>(95% UI)</b> | <b>Cases in<br/>2019<br/>No.×103<br/>(95% UI)</b> | <b>Change in<br/>absolute<br/>number<br/>(%)</b> | <b>Rates in<br/>1990 per<br/>100000<br/>(95% UI)</b> | <b>Rates in<br/>2019 per<br/>100000<br/>(95% UI)</b> | <b>EAPC<br/>from 1990<br/>and 2019<br/>(95%CI)</b> |
|-------------------------------------------|-----------------------------|---------------------------------------------------|---------------------------------------------------|--------------------------------------------------|------------------------------------------------------|------------------------------------------------------|----------------------------------------------------|
| Lao<br>People's<br>Democratic<br>Republic | Inherited<br>anemias        | 49<br>(45 to 54)                                  | 51<br>(47 to 57)                                  | 0.04<br>(0.01 to<br>0.07)                        | 1191.21<br>(1079.46 to<br>1309.6)                    | 718.27<br>(651.45 to<br>791.38)                      | -1.93<br>(-2 to<br>-1.85)                          |
| Lao<br>People's<br>Democratic<br>Republic | Thalassemi<br>as            | 1<br>(1 to 1)                                     | 1<br>(1 to 2)                                     | 0.63<br>(0.49 to<br>0.78)                        | 21.38<br>(16.51 to<br>27.21)                         | 20.21<br>(15.71 to<br>26.56)                         | -0.37<br>(-0.45 to<br>-0.29)                       |
| Lao<br>People's<br>Democratic<br>Republic | Thalassemi<br>as trait      | 15<br>(14 to 17)                                  | 19<br>(17 to 21)                                  | 0.26<br>(0.21 to<br>0.3)                         | 366.35<br>(328.32 to<br>410.01)                      | 267.09<br>(242.66 to<br>296.82)                      | -1.26<br>(-1.33 to<br>-1.19)                       |
| Lao<br>People's<br>Democratic<br>Republic | Sickle<br>cell<br>disorders | 0<br>(0 to 0)                                     | 0<br>(0 to 0)                                     | 0.05<br>(-0.07 to<br>0.21)                       | 0.04<br>(0.02 to<br>0.05)                            | 0.02<br>(0.01 to<br>0.03)                            | -1.87<br>(-1.92 to<br>-1.81)                       |
| Lao<br>People's<br>Democratic<br>Republic | Sickle<br>cell trait        | 1<br>(1 to 1)                                     | 1<br>(1 to 1)                                     | 0.05<br>(-0.01 to<br>0.13)                       | 22.43<br>(18.45 to<br>27.13)                         | 13.63<br>(11.22 to<br>16.43)                         | -1.87<br>(-1.93 to<br>-1.8)                        |
| Lao<br>People's<br>Democratic<br>Republic | G6PD<br>deficiency          | 9<br>(7 to 11)                                    | 9<br>(7 to 11)                                    | -0.01<br>(-0.08 to<br>0.06)                      | 214.08<br>(164.77 to<br>266.4)                       | 123.02<br>(95.4 to<br>153.59)                        | -2.14<br>(-2.22 to<br>-2.06)                       |
| Lao<br>People's<br>Democratic<br>Republic | G6PD trait                  | 24<br>(21 to 26)                                  | 21<br>(19 to 23)                                  | -0.1<br>(-0.14 to<br>-0.08)                      | 566.94<br>(510.69 to<br>618.45)                      | 294.31<br>(265.12 to<br>324.67)                      | -2.42<br>(-2.57 to<br>-2.28)                       |
| Latvia                                    | Inherited<br>anemias        | 5<br>(4 to 5)                                     | 2<br>(2 to 3)                                     | -0.46<br>(-0.47 to<br>-0.46)                     | 170.47<br>(150.79 to<br>191.29)                      | 126.78<br>(111.85 to<br>141.56)                      | 0.17<br>(-0.4 to<br>0.75)                          |
| Latvia                                    | Thalassemi<br>as            | 0<br>(0 to 0)                                     | 0<br>(0 to 0)                                     | -0.64<br>(-0.67 to<br>-0.59)                     | 0.71<br>(0.49 to<br>1.04)                            | 0.36<br>(0.26 to<br>0.51)                            | -1.11<br>(-1.7 to<br>-0.52)                        |
| Latvia                                    | Thalassemi<br>as trait      | 1<br>(1 to 1)                                     | 0<br>(0 to 1)                                     | -0.45<br>(-0.49 to<br>-0.42)                     | 33.06<br>(27.45 to<br>40.6)                          | 25.11<br>(20.95 to<br>29.97)                         | 0.24<br>(-0.35 to<br>0.83)                         |
| Latvia                                    | Sickle<br>cell<br>disorders | 0<br>(0 to 0)                                     | 0<br>(0 to 0)                                     | -0.44<br>(-0.54 to<br>-0.32)                     | 0.01<br>(0.01 to<br>0.01)                            | 0.01<br>(0 to 0.01)                                  | 0.34<br>(-0.19 to<br>0.88)                         |
| Latvia                                    | Sickle<br>cell trait        | 0<br>(0 to 0)                                     | 0<br>(0 to 0)                                     | -0.46<br>(-0.52 to<br>-0.41)                     | 6.44<br>(5.18 to<br>7.97)                            | 4.79<br>(3.9 to<br>5.92)                             | 0.23<br>(-0.33 to<br>0.79)                         |

| <b>Regions</b> | <b>Causes</b>               | <b>Cases in<br/>1990<br/>No.×103<br/>(95% UI)</b> | <b>Cases in<br/>2019<br/>No.×103<br/>(95% UI)</b> | <b>Change in<br/>absolute<br/>number<br/>(%)</b> | <b>Rates in<br/>1990 per<br/>100000<br/>(95% UI)</b> | <b>Rates in<br/>2019 per<br/>100000<br/>(95% UI)</b> | <b>EAPC<br/>from 1990<br/>and 2019<br/>(95%CI)</b> |
|----------------|-----------------------------|---------------------------------------------------|---------------------------------------------------|--------------------------------------------------|------------------------------------------------------|------------------------------------------------------|----------------------------------------------------|
| Latvia         | G6PD<br>deficiency          | 1<br>(1 to 1)                                     | 0<br>(0 to 0)                                     | -0.43<br>(-0.46 to<br>-0.41)                     | 26.6<br>(20.4 to<br>33.03)                           | 20.97<br>(16.08 to<br>26.01)                         | 0.07<br>(-0.49 to<br>0.63)                         |
| Latvia         | G6PD trait                  | 3<br>(2 to 3)                                     | 1<br>(1 to 2)                                     | -0.48<br>(-0.48 to<br>-0.48)                     | 103.66<br>(91.74 to<br>115.99)                       | 75.54<br>(66.85 to<br>84.53)                         | 0.18<br>(-0.4 to<br>0.77)                          |
| Lebanon        | Inherited<br>anemias        | 35<br>(32 to 38)                                  | 34<br>(31 to 36)                                  | -0.03<br>(-0.06 to<br>-0.01)                     | 1063.95<br>(978.01 to<br>1155.03)                    | 649.95<br>(598.4 to<br>703.83)                       | -1.32<br>(-1.48 to<br>-1.16)                       |
| Lebanon        | Thalassemi<br>as            | 0<br>(0 to 0)                                     | 0<br>(0 to 0)                                     | -0.02<br>(-0.12 to<br>0.11)                      | 3.1<br>(2.23 to<br>4.21)                             | 1.92<br>(1.41 to<br>2.55)                            | -1.33<br>(-1.47 to<br>-1.19)                       |
| Lebanon        | Thalassemi<br>as trait      | 7<br>(6 to 8)                                     | 7<br>(6 to 8)                                     | -0.02<br>(-0.07 to<br>0.04)                      | 214.11<br>(183.89 to<br>247.27)                      | 132.65<br>(115.77 to<br>152.06)                      | -1.31<br>(-1.45 to<br>-1.16)                       |
| Lebanon        | Sickle<br>cell<br>disorders | 0<br>(0 to 0)                                     | 0<br>(0 to 0)                                     | 0.06<br>(-0.02 to<br>0.14)                       | 2.33<br>(1.85 to<br>2.94)                            | 1.56<br>(1.24 to<br>1.93)                            | -1.02<br>(-1.14 to<br>-0.9)                        |
| Lebanon        | Sickle<br>cell trait        | 6<br>(5 to 6)                                     | 6<br>(5 to 6)                                     | 0<br>(-0.04 to<br>0.03)                          | 173.74<br>(155.52 to<br>195.04)                      | 109.37<br>(98.07 to<br>122.07)                       | -1.22<br>(-1.34 to<br>-1.09)                       |
| Lebanon        | G6PD<br>deficiency          | 4<br>(3 to 5)                                     | 4<br>(3 to 5)                                     | -0.04<br>(-0.09 to<br>0.01)                      | 117.89<br>(91.2 to<br>147.47)                        | 71.3<br>(55.27 to<br>88.36)                          | -1.32<br>(-1.8 to<br>-0.85)                        |
| Lebanon        | G6PD trait                  | 18<br>(16 to 20)                                  | 17<br>(16 to 19)                                  | -0.05<br>(-0.08 to<br>-0.02)                     | 552.79<br>(501.49 to<br>601.58)                      | 333.15<br>(303.27 to<br>361.48)                      | -1.37<br>(-1.51 to<br>-1.22)                       |
| Lesotho        | Inherited<br>anemias        | 18<br>(16 to 20)                                  | 13<br>(11 to 15)                                  | -0.27<br>(-0.3 to<br>-0.26)                      | 982.6<br>(859.19 to<br>1112.3)                       | 615.81<br>(539.93 to<br>694.52)                      | -1.58<br>(-1.68 to<br>-1.48)                       |
| Lesotho        | Thalassemi<br>as            | 0<br>(0 to 0)                                     | 0<br>(0 to 0)                                     | 0.56<br>(0.35 to<br>0.85)                        | 0.08<br>(0.05 to<br>0.12)                            | 0.11<br>(0.06 to<br>0.16)                            | 0.82<br>(0.66 to<br>0.98)                          |
| Lesotho        | Thalassemi<br>as trait      | 0<br>(0 to 1)                                     | 0<br>(0 to 1)                                     | -0.04<br>(-0.11 to<br>0.04)                      | 27.16<br>(22.71 to<br>32.3)                          | 22.51<br>(18.45 to<br>26.77)                         | -0.72<br>(-0.79 to<br>-0.65)                       |
| Lesotho        | Sickle<br>cell<br>disorders | 0<br>(0 to 0)                                     | 0<br>(0 to 0)                                     | -0.25<br>(-0.31 to<br>-0.18)                     | 0.12<br>(0.08 to<br>0.17)                            | 0.08<br>(0.05 to<br>0.11)                            | -1.49<br>(-1.55 to<br>-1.43)                       |
| Lesotho        | Sickle<br>cell trait        | 1<br>(0 to 1)                                     | 0<br>(0 to 1)                                     | -0.25<br>(-0.29 to<br>-0.22)                     | 34.18<br>(26.45 to<br>43.54)                         | 22.12<br>(17.17 to<br>28.19)                         | -1.5<br>(-1.56 to<br>-1.44)                        |

| <b>Regions</b> | <b>Causes</b>                | <b>Cases in<br/>1990<br/>No.×103<br/>(95% UI)</b> | <b>Cases in<br/>2019<br/>No.×103<br/>(95% UI)</b> | <b>Change in<br/>absolute<br/>number<br/>(%)</b> | <b>Rates in<br/>1990 per<br/>100000<br/>(95% UI)</b> | <b>Rates in<br/>2019 per<br/>100000<br/>(95% UI)</b> | <b>EAPC<br/>from 1990<br/>and 2019<br/>(95%CI)</b> |
|----------------|------------------------------|---------------------------------------------------|---------------------------------------------------|--------------------------------------------------|------------------------------------------------------|------------------------------------------------------|----------------------------------------------------|
| <b>Lesotho</b> | G6PD<br>deficiency           | 6<br>(4 to 7)                                     | 4<br>(3 to 5)                                     | -0.31<br>(-0.35 to<br>-0.26)                     | 312.17<br>(242.35 to<br>393.09)                      | 187.13<br>(145.36 to<br>233.02)                      | -1.74<br>(-1.88 to<br>-1.6)                        |
| <b>Lesotho</b> | G6PD trait                   | 11<br>(10 to 12)                                  | 8<br>(7 to 9)                                     | -0.27<br>(-0.29 to<br>-0.25)                     | 608.89<br>(557.73 to<br>657.37)                      | 383.88<br>(350 to<br>415.54)                         | -1.55<br>(-1.64 to<br>-1.47)                       |
| <b>Liberia</b> | <b>Inherited<br/>anemias</b> | 39<br>(36 to 43)                                  | 61<br>(56 to 66)                                  | 0.54<br>(0.52 to<br>0.57)                        | 2006.89<br>(1841.24 to<br>2190.34)                   | 1270.33<br>(1163.38 to<br>1385.61)                   | -1.63<br>(-1.85 to<br>-1.4)                        |
| <b>Liberia</b> | Thalassemi<br>as             | 0<br>(0 to 0)                                     | 0<br>(0 to 0)                                     | 0.59<br>(0.45 to<br>0.76)                        | 6.54<br>(4.97 to<br>8.68)                            | 4.26<br>(3.26 to<br>5.71)                            | -1.55<br>(-1.78 to<br>-1.32)                       |
| <b>Liberia</b> | Thalassemi<br>as trait       | 7<br>(6 to 8)                                     | 11<br>(10 to 12)                                  | 0.59<br>(0.52 to<br>0.66)                        | 346.52<br>(306.4 to<br>394.64)                       | 225.48<br>(200.16 to<br>257.55)                      | -1.55<br>(-1.78 to<br>-1.32)                       |
| <b>Liberia</b> | Sickle<br>cell<br>disorders  | 0<br>(0 to 1)                                     | 1<br>(1 to 1)                                     | 0.55<br>(0.47 to<br>0.64)                        | 22.07<br>(18.61 to<br>25.78)                         | 14<br>(11.82 to<br>16.51)                            | -1.63<br>(-1.86 to<br>-1.4)                        |
| <b>Liberia</b> | Sickle<br>cell trait         | 10<br>(9 to 11)                                   | 16<br>(15 to 17)                                  | 0.54<br>(0.49 to<br>0.59)                        | 522.1<br>(480.23 to<br>565.71)                       | 328.74<br>(303.09 to<br>356.84)                      | -1.65<br>(-1.88 to<br>-1.42)                       |
| <b>Liberia</b> | G6PD<br>deficiency           | 8<br>(6 to 10)                                    | 12<br>(9 to 15)                                   | 0.53<br>(0.43 to<br>0.63)                        | 398.24<br>(307 to<br>498.41)                         | 250.65<br>(193.84 to<br>315.29)                      | -1.61<br>(-1.82 to<br>-1.39)                       |
| <b>Liberia</b> | G6PD trait                   | 14<br>(13 to 15)                                  | 21<br>(19 to 23)                                  | 0.53<br>(0.53 to<br>0.53)                        | 711.44<br>(644.9 to<br>772.73)                       | 447.21<br>(405.46 to<br>485.6)                       | -1.66<br>(-1.89 to<br>-1.44)                       |
| <b>Libya</b>   | <b>Inherited<br/>anemias</b> | 74<br>(68 to 80)                                  | 38<br>(35 to 41)                                  | -0.48<br>(-0.49 to<br>-0.47)                     | 1745.25<br>(1604.29 to<br>1887.46)                   | 567.07<br>(521.76 to<br>614.78)                      | -3.85<br>(-3.92 to<br>-3.77)                       |
| <b>Libya</b>   | Thalassemi<br>as             | 0<br>(0 to 0)                                     | 0<br>(0 to 0)                                     | -0.38<br>(-0.45 to<br>-0.28)                     | 2.18<br>(1.42 to<br>3.3)                             | 0.85<br>(0.57 to<br>1.27)                            | -3.32<br>(-3.4 to<br>-3.24)                        |
| <b>Libya</b>   | Thalassemi<br>as trait       | 8<br>(7 to 10)                                    | 5<br>(4 to 6)                                     | -0.42<br>(-0.45 to<br>-0.38)                     | 187.44<br>(154.22 to<br>228.74)                      | 68.26<br>(56.88 to<br>82.43)                         | -3.52<br>(-3.59 to<br>-3.46)                       |
| <b>Libya</b>   | Sickle<br>cell<br>disorders  | 1<br>(1 to 1)                                     | 1<br>(0 to 1)                                     | -0.44<br>(-0.49 to<br>-0.38)                     | 22.99<br>(17.06 to<br>31.7)                          | 8.16<br>(6.11 to<br>11.1)                            | -3.49<br>(-3.64 to<br>-3.35)                       |
| <b>Libya</b>   | Sickle<br>cell trait         | 23<br>(20 to 26)                                  | 12<br>(11 to 14)                                  | -0.46<br>(-0.48 to<br>-0.43)                     | 532.55<br>(465.86 to<br>617.91)                      | 181.38<br>(159.27 to<br>209.05)                      | -3.67<br>(-3.75 to<br>-3.58)                       |

| <b>Regions</b>    | <b>Causes</b>                | <b>Cases in<br/>1990<br/>No.×103<br/>(95% UI)</b> | <b>Cases in<br/>2019<br/>No.×103<br/>(95% UI)</b> | <b>Change in<br/>absolute<br/>number<br/>(%)</b> | <b>Rates in<br/>1990 per<br/>100000<br/>(95% UI)</b> | <b>Rates in<br/>2019 per<br/>100000<br/>(95% UI)</b> | <b>EAPC<br/>from 1990<br/>and 2019<br/>(95%CI)</b> |
|-------------------|------------------------------|---------------------------------------------------|---------------------------------------------------|--------------------------------------------------|------------------------------------------------------|------------------------------------------------------|----------------------------------------------------|
| <b>Libya</b>      | G6PD<br>deficiency           | 10<br>(8 to 13)                                   | 5<br>(4 to 6)                                     | -0.54<br>(-0.56 to<br>-0.51)                     | 238.79<br>(184.15 to<br>301.86)                      | 69.53<br>(53.54 to<br>86.89)                         | -4.23<br>(-4.38 to<br>-4.08)                       |
| <b>Libya</b>      | G6PD trait                   | 32<br>(30 to 34)                                  | 16<br>(15 to 17)                                  | -0.5<br>(-0.51 to<br>-0.49)                      | 761.3<br>(707.35 to<br>808.97)                       | 238.89<br>(220.36 to<br>255.29)                      | -3.96<br>(-4.05 to<br>-3.88)                       |
| <b>Lithuania</b>  | <b>Inherited<br/>anemias</b> | 7<br>(6 to 8)                                     | 3<br>(3 to 4)                                     | -0.51<br>(-0.52 to<br>-0.5)                      | 188.22<br>(166.58 to<br>210.84)                      | 121.91<br>(107.83 to<br>136.9)                       | -0.75<br>(-1.24 to<br>-0.25)                       |
| <b>Lithuania</b>  | Thalassemi<br>as             | 0<br>(0 to 0)                                     | 0<br>(0 to 0)                                     | -0.67<br>(-0.7 to<br>-0.62)                      | 0.75<br>(0.52 to<br>1.1)                             | 0.33<br>(0.24 to<br>0.46)                            | -2.04<br>(-2.55 to<br>-1.53)                       |
| <b>Lithuania</b>  | Thalassemi<br>as trait       | 1<br>(1 to 2)                                     | 1<br>(1 to 1)                                     | -0.5<br>(-0.53 to<br>-0.47)                      | 35.73<br>(29.7 to<br>43.75)                          | 23.57<br>(19.71 to<br>28.5)                          | -0.69<br>(-1.19 to<br>-0.19)                       |
| <b>Lithuania</b>  | Sickle<br>cell<br>disorders  | 0<br>(0 to 0)                                     | 0<br>(0 to 0)                                     | -0.51<br>(-0.6 to<br>-0.42)                      | 0.01<br>(0.01 to<br>0.01)                            | 0.01<br>(0 to 0.01)                                  | -0.75<br>(-1.22 to<br>-0.28)                       |
| <b>Lithuania</b>  | Sickle<br>cell trait         | 0<br>(0 to 0)                                     | 0<br>(0 to 0)                                     | -0.51<br>(-0.57 to<br>-0.47)                     | 7.11<br>(5.74 to<br>8.83)                            | 4.56<br>(3.69 to<br>5.65)                            | -0.74<br>(-1.22 to<br>-0.26)                       |
| <b>Lithuania</b>  | G6PD<br>deficiency           | 1<br>(1 to 1)                                     | 1<br>(0 to 1)                                     | -0.48<br>(-0.52 to<br>-0.45)                     | 29.67<br>(22.94 to<br>36.89)                         | 20.3<br>(15.75 to<br>25.81)                          | -0.87<br>(-1.35 to<br>-0.39)                       |
| <b>Lithuania</b>  | G6PD trait                   | 4<br>(4 to 5)                                     | 2<br>(2 to 2)                                     | -0.52<br>(-0.52 to<br>-0.52)                     | 114.96<br>(102.07 to<br>128.28)                      | 73.16<br>(64.96 to<br>81.64)                         | -0.73<br>(-1.23 to<br>-0.23)                       |
| <b>Luxembourg</b> | <b>Inherited<br/>anemias</b> | 1<br>(1 to 1)                                     | 1<br>(1 to 1)                                     | 0.29<br>(0.25 to<br>0.33)                        | 232.02<br>(208.89 to<br>256.93)                      | 183.98<br>(164.34 to<br>204.22)                      | -1.1<br>(-1.2 to<br>-1)                            |
| <b>Luxembourg</b> | Thalassemi<br>as             | 0<br>(0 to 0)                                     | 0<br>(0 to 0)                                     | 0.22<br>(0.08 to<br>0.4)                         | 0.16<br>(0.11 to<br>0.22)                            | 0.12<br>(0.09 to<br>0.17)                            | -2.12<br>(-2.92 to<br>-1.31)                       |
| <b>Luxembourg</b> | Thalassemi<br>as trait       | 0<br>(0 to 0)                                     | 0<br>(0 to 0)                                     | 0.33<br>(0.25 to<br>0.41)                        | 20.46<br>(17.61 to<br>23.46)                         | 16.82<br>(14.58 to<br>19.27)                         | -1.19<br>(-1.43 to<br>-0.96)                       |
| <b>Luxembourg</b> | Sickle<br>cell<br>disorders  | 0<br>(0 to 0)                                     | 0<br>(0 to 0)                                     | 0.21<br>(0.05 to<br>0.38)                        | 0.53<br>(0.38 to<br>0.72)                            | 0.4<br>(0.28 to<br>0.53)                             | -1.18<br>(-1.36 to<br>-1)                          |
| <b>Luxembourg</b> | Sickle<br>cell trait         | 0<br>(0 to 0)                                     | 0<br>(0 to 0)                                     | 0.09<br>(0 to 0.17)                              | 29.3<br>(23.6 to<br>35.79)                           | 19.61<br>(16.05 to<br>23.52)                         | -1.55<br>(-1.72 to<br>-1.37)                       |

| <b>Regions</b> | <b>Causes</b>               | <b>Cases in<br/>1990<br/>No.×103<br/>(95% UI)</b> | <b>Cases in<br/>2019<br/>No.×103<br/>(95% UI)</b> | <b>Change in<br/>absolute<br/>number<br/>(%)</b> | <b>Rates in<br/>1990 per<br/>100000<br/>(95% UI)</b> | <b>Rates in<br/>2019 per<br/>100000<br/>(95% UI)</b> | <b>EAPC<br/>from 1990<br/>and 2019<br/>(95%CI)</b> |
|----------------|-----------------------------|---------------------------------------------------|---------------------------------------------------|--------------------------------------------------|------------------------------------------------------|------------------------------------------------------|----------------------------------------------------|
| Luxembourg     | G6PD<br>deficiency          | 0<br>(0 to 0)                                     | 0<br>(0 to 0)                                     | 0.38<br>(0.32 to<br>0.45)                        | 35.27<br>(27.33 to<br>44.02)                         | 29.97<br>(23.01 to<br>37.3)                          | -0.9<br>(-1.02 to<br>-0.79)                        |
| Luxembourg     | G6PD trait                  | 1<br>(0 to 1)                                     | 1<br>(1 to 1)                                     | 0.3<br>(0.25 to<br>0.35)                         | 146.29<br>(131.12 to<br>161.96)                      | 117.05<br>(104.89 to<br>128.65)                      | -1.05<br>(-1.17 to<br>-0.94)                       |
| Madagascar     | Inherited<br>anemias        | 253<br>(226 to<br>282)                            | 330<br>(299 to<br>363)                            | 0.3<br>(0.27 to<br>0.34)                         | 2114.4<br>(1890.96 to<br>2355.65)                    | 1234.68<br>(1121.44 to<br>1358.68)                   | -1.7<br>(-2 to<br>-1.4)                            |
| Madagascar     | Thalassemi<br>as            | 0<br>(0 to 0)                                     | 0<br>(0 to 0)                                     | 2.61<br>(2.04 to<br>3.25)                        | 0.09<br>(0.05 to<br>0.14)                            | 0.15<br>(0.08 to<br>0.23)                            | 1.25<br>(1.01 to<br>1.49)                          |
| Madagascar     | Thalassemi<br>as trait      | 3<br>(2 to 4)                                     | 7<br>(5 to 9)                                     | 1.22<br>(1.04 to<br>1.42)                        | 26.34<br>(20.77 to<br>31.87)                         | 26.18<br>(20.5 to<br>32.13)                          | -0.24<br>(-0.38 to<br>-0.1)                        |
| Madagascar     | Sickle<br>cell<br>disorders | 2<br>(2 to 3)                                     | 3<br>(3 to 4)                                     | 0.56<br>(0.41 to<br>0.72)                        | 18.11<br>(14.43 to<br>23.03)                         | 12.65<br>(10.15 to<br>16.17)                         | -1.45<br>(-1.63 to<br>-1.26)                       |
| Madagascar     | Sickle<br>cell trait        | 64<br>(57 to 71)                                  | 101<br>(91 to 113)                                | 0.58<br>(0.5 to<br>0.65)                         | 533.12<br>(480.22 to<br>597.3)                       | 376.84<br>(340.34 to<br>423.52)                      | -1.33<br>(-1.46 to<br>-1.19)                       |
| Madagascar     | G6PD<br>deficiency          | 78<br>(60 to 97)                                  | 70<br>(54 to 88)                                  | -0.1<br>(-0.17 to<br>-0.05)                      | 652.39<br>(505.18 to<br>810.96)                      | 262.47<br>(203.77 to<br>329.44)                      | -2.58<br>(-3.25 to<br>-1.91)                       |
| Madagascar     | G6PD trait                  | 106<br>(97 to 113)                                | 149<br>(136 to<br>161)                            | 0.41<br>(0.37 to<br>0.44)                        | 884.34<br>(815.07 to<br>947.23)                      | 556.39<br>(507.75 to<br>601.7)                       | -1.47<br>(-1.69 to<br>-1.25)                       |
| Malawi         | Inherited<br>anemias        | 166<br>(148 to<br>185)                            | 178<br>(159 to<br>198)                            | 0.08<br>(0.06 to<br>0.09)                        | 1733.65<br>(1544.03 to<br>1934.37)                   | 965.65<br>(864.22 to<br>1076.29)                     | -2.19<br>(-2.48 to<br>-1.9)                        |
| Malawi         | Thalassemi<br>as            | 0<br>(0 to 0)                                     | 0<br>(0 to 0)                                     | 1.61<br>(1.31 to<br>1.98)                        | 0.1<br>(0.06 to<br>0.15)                             | 0.14<br>(0.08 to<br>0.21)                            | 0.53<br>(0.22 to<br>0.84)                          |
| Malawi         | Thalassemi<br>as trait      | 3<br>(2 to 3)                                     | 4<br>(4 to 5)                                     | 0.61<br>(0.51 to<br>0.74)                        | 29<br>(23.06 to<br>35.64)                            | 24.23<br>(19.21 to<br>29.34)                         | -0.97<br>(-1.22 to<br>-0.73)                       |
| Malawi         | Sickle<br>cell<br>disorders | 0<br>(0 to 1)                                     | 1<br>(0 to 1)                                     | 0.18<br>(0.08 to<br>0.29)                        | 4.61<br>(3.66 to<br>5.97)                            | 2.81<br>(2.23 to<br>3.64)                            | -1.78<br>(-2.05 to<br>-1.5)                        |
| Malawi         | Sickle<br>cell trait        | 27<br>(25 to 31)                                  | 32<br>(29 to 37)                                  | 0.17<br>(0.12 to<br>0.22)                        | 287.5<br>(257.06 to<br>327.54)                       | 173.99<br>(155.53 to<br>197.96)                      | -1.88<br>(-2.12 to<br>-1.64)                       |

| <b>Regions</b>  | <b>Causes</b>                | <b>Cases in<br/>1990<br/>No.×103<br/>(95% UI)</b> | <b>Cases in<br/>2019<br/>No.×103<br/>(95% UI)</b> | <b>Change in<br/>absolute<br/>number<br/>(%)</b> | <b>Rates in<br/>1990 per<br/>100000<br/>(95% UI)</b> | <b>Rates in<br/>2019 per<br/>100000<br/>(95% UI)</b> | <b>EAPC<br/>from 1990<br/>and 2019<br/>(95%CI)</b> |
|-----------------|------------------------------|---------------------------------------------------|---------------------------------------------------|--------------------------------------------------|------------------------------------------------------|------------------------------------------------------|----------------------------------------------------|
| <b>Malawi</b>   | G6PD<br>deficiency           | 48<br>(37 to 60)                                  | 45<br>(35 to 56)                                  | -0.05<br>(-0.07 to<br>-0.04)                     | 498.72<br>(384.49 to<br>624.52)                      | 244.27<br>(189.09 to<br>304.49)                      | -2.65<br>(-3.05 to<br>-2.24)                       |
| <b>Malawi</b>   | G6PD trait                   | 87<br>(80 to 94)                                  | 96<br>(87 to 104)                                 | 0.1<br>(0.09 to<br>0.1)                          | 913.73<br>(836.13 to<br>983.96)                      | 520.22<br>(474.35 to<br>562.61)                      | -2.11<br>(-2.37 to<br>-1.85)                       |
| <b>Malaysia</b> | <b>Inherited<br/>anemias</b> | 148<br>(133 to<br>166)                            | 94<br>(84 to 104)                                 | -0.37<br>(-0.4 to<br>-0.34)                      | 841<br>(751.66 to<br>938.62)                         | 299.22<br>(267.46 to<br>332.39)                      | -3.95<br>(-4.44 to<br>-3.45)                       |
| <b>Malaysia</b> | Thalassemi<br>as             | 0<br>(0 to 0)                                     | 0<br>(0 to 0)                                     | 0.2<br>(0.04 to<br>0.36)                         | 1.58<br>(1.27 to<br>1.99)                            | 1.07<br>(0.83 to<br>1.37)                            | -1.75<br>(-2.04 to<br>-1.45)                       |
| <b>Malaysia</b> | Thalassemi<br>as trait       | 14<br>(13 to 16)                                  | 18<br>(16 to 20)                                  | 0.27<br>(0.22 to<br>0.31)                        | 81.4<br>(72.1 to<br>90.61)                           | 58.33<br>(51.46 to<br>64.65)                         | -1.54<br>(-1.81 to<br>-1.28)                       |
| <b>Malaysia</b> | Sickle<br>cell<br>disorders  | 0<br>(0 to 0)                                     | 0<br>(0 to 0)                                     | 0.06<br>(-0.29 to<br>0.3)                        | 0.02<br>(0.01 to<br>0.02)                            | 0.01<br>(0.01 to<br>0.01)                            | -2.09<br>(-2.36 to<br>-1.82)                       |
| <b>Malaysia</b> | Sickle<br>cell trait         | 2<br>(2 to 3)                                     | 2<br>(2 to 3)                                     | 0.08<br>(-0.11 to<br>0.21)                       | 12.87<br>(10.36 to<br>15.33)                         | 7.83<br>(6.38 to<br>9.34)                            | -2.07<br>(-2.33 to<br>-1.81)                       |
| <b>Malaysia</b> | G6PD<br>deficiency           | 42<br>(34 to 53)                                  | 18<br>(14 to 22)                                  | -0.58<br>(-0.62 to<br>-0.53)                     | 240.65<br>(190.77 to<br>301.46)                      | 56.41<br>(43.8 to<br>70.3)                           | -5.29<br>(-6.23 to<br>-4.34)                       |
| <b>Malaysia</b> | G6PD trait                   | 89<br>(82 to 96)                                  | 55<br>(49 to 61)                                  | -0.38<br>(-0.42 to<br>-0.35)                     | 504.48<br>(466.14 to<br>542.06)                      | 175.57<br>(156.88 to<br>193.33)                      | -4.01<br>(-4.48 to<br>-3.54)                       |
| <b>Maldives</b> | <b>Inherited<br/>anemias</b> | 3<br>(3 to 4)                                     | 3<br>(3 to 3)                                     | -0.12<br>(-0.16 to<br>-0.09)                     | 1498.82<br>(1359.28 to<br>1645.81)                   | 584.5<br>(527.89 to<br>645.75)                       | -2.7<br>(-3 to<br>-2.39)                           |
| <b>Maldives</b> | Thalassemi<br>as             | 0<br>(0 to 0)                                     | 0<br>(0 to 0)                                     | -0.13<br>(-0.24 to<br>0.01)                      | 27.01<br>(20.34 to<br>35.18)                         | 10.49<br>(8.01 to<br>13.62)                          | -2.77<br>(-3.12 to<br>-2.43)                       |
| <b>Maldives</b> | Thalassemi<br>as trait       | 1<br>(1 to 2)                                     | 1<br>(1 to 2)                                     | -0.05<br>(-0.11 to<br>0.02)                      | 637.17<br>(559.15 to<br>723.49)                      | 269.41<br>(236.96 to<br>306.7)                       | -2.44<br>(-2.75 to<br>-2.13)                       |
| <b>Maldives</b> | Sickle<br>cell<br>disorders  | 0<br>(0 to 0)                                     | 0<br>(0 to 0)                                     | -0.06<br>(-0.36 to<br>0.17)                      | 0.03<br>(0.02 to<br>0.04)                            | 0.01<br>(0.01 to<br>0.02)                            | -2.34<br>(-2.66 to<br>-2.01)                       |
| <b>Maldives</b> | Sickle<br>cell trait         | 0<br>(0 to 0)                                     | 0<br>(0 to 0)                                     | -0.05<br>(-0.19 to<br>0.07)                      | 20.25<br>(16.87 to<br>24.48)                         | 8.61<br>(7.15 to<br>10.44)                           | -2.33<br>(-2.63 to<br>-2.04)                       |

| <b>Regions</b>  | <b>Causes</b>                | <b>Cases in<br/>1990<br/>No.×103<br/>(95% UI)</b> | <b>Cases in<br/>2019<br/>No.×103<br/>(95% UI)</b> | <b>Change in<br/>absolute<br/>number<br/>(%)</b> | <b>Rates in<br/>1990 per<br/>100000<br/>(95% UI)</b> | <b>Rates in<br/>2019 per<br/>100000<br/>(95% UI)</b> | <b>EAPC<br/>from 1990<br/>and 2019<br/>(95%CI)</b> |
|-----------------|------------------------------|---------------------------------------------------|---------------------------------------------------|--------------------------------------------------|------------------------------------------------------|------------------------------------------------------|----------------------------------------------------|
| <b>Maldives</b> | G6PD<br>deficiency           | 1<br>(0 to 1)                                     | 0<br>(0 to 1)                                     | -0.19<br>(-0.24 to<br>-0.12)                     | 238.81<br>(185.2 to<br>301.31)                       | 86.43<br>(66.59 to<br>107.77)                        | -2.91<br>(-3.26 to<br>-2.57)                       |
| <b>Maldives</b> | G6PD trait                   | 1<br>(1 to 1)                                     | 1<br>(1 to 1)                                     | -0.18<br>(-0.21 to<br>-0.16)                     | 575.54<br>(518.83 to<br>627.34)                      | 209.56<br>(188.32 to<br>231.33)                      | -2.92<br>(-3.25 to<br>-2.58)                       |
| <b>Mali</b>     | <b>Inherited<br/>anemias</b> | 141<br>(128 to<br>154)                            | 302<br>(276 to<br>331)                            | 1.15<br>(1.09 to<br>1.2)                         | 1622.17<br>(1473.83 to<br>1778.26)                   | 1379.93<br>(1259.26 to<br>1510.83)                   | -0.59<br>(-0.61 to<br>-0.57)                       |
| <b>Mali</b>     | Thalassemi<br>as             | 0<br>(0 to 0)                                     | 0<br>(0 to 0)                                     | 2.88<br>(2.36 to<br>3.39)                        | 0.16<br>(0.11 to<br>0.22)                            | 0.24<br>(0.15 to<br>0.35)                            | 1.3<br>(1.17 to<br>1.43)                           |
| <b>Mali</b>     | Thalassemi<br>as trait       | 5<br>(4 to 6)                                     | 12<br>(10 to 14)                                  | 1.57<br>(1.42 to<br>1.74)                        | 55.36<br>(46.74 to<br>65.21)                         | 56.34<br>(47.77 to<br>65.97)                         | -0.03<br>(-0.07 to<br>0.02)                        |
| <b>Mali</b>     | Sickle<br>cell<br>disorders  | 3<br>(3 to 3)                                     | 6<br>(5 to 7)                                     | 1.12<br>(1 to 1.27)                              | 33.86<br>(29.17 to<br>39.24)                         | 28.43<br>(24.48 to<br>32.91)                         | -0.65<br>(-0.68 to<br>-0.63)                       |
| <b>Mali</b>     | Sickle<br>cell trait         | 49<br>(45 to 54)                                  | 105<br>(95 to 116)                                | 1.13<br>(1.04 to<br>1.25)                        | 567.75<br>(513.92 to<br>628.11)                      | 479.53<br>(432.18 to<br>531.29)                      | -0.62<br>(-0.64 to<br>-0.6)                        |
| <b>Mali</b>     | G6PD<br>deficiency           | 25<br>(19 to 31)                                  | 52<br>(40 to 66)                                  | 1.12<br>(0.94 to<br>1.31)                        | 283.37<br>(218.27 to<br>353.9)                       | 237.94<br>(183.94 to<br>299.39)                      | -0.63<br>(-0.64 to<br>-0.61)                       |
| <b>Mali</b>     | G6PD trait                   | 59<br>(53 to 65)                                  | 127<br>(114 to<br>138)                            | 1.14<br>(1.08 to<br>1.2)                         | 681.66<br>(613.24 to<br>749.45)                      | 577.44<br>(519.41 to<br>631.47)                      | -0.6<br>(-0.61 to<br>-0.58)                        |
| <b>Malta</b>    | <b>Inherited<br/>anemias</b> | 1<br>(1 to 1)                                     | 1<br>(1 to 1)                                     | -0.23<br>(-0.25 to<br>-0.21)                     | 272.42<br>(245.13 to<br>301.5)                       | 176.98<br>(158.35 to<br>196.44)                      | -1.34<br>(-1.68 to<br>-1)                          |
| <b>Malta</b>    | Thalassemi<br>as             | 0<br>(0 to 0)                                     | 0<br>(0 to 0)                                     | -0.28<br>(-0.38 to<br>-0.16)                     | 0.19<br>(0.13 to<br>0.26)                            | 0.12<br>(0.08 to<br>0.17)                            | -2.38<br>(-3 to<br>-1.75)                          |
| <b>Malta</b>    | Thalassemi<br>as trait       | 0<br>(0 to 0)                                     | 0<br>(0 to 0)                                     | -0.22<br>(-0.27 to<br>-0.17)                     | 23.98<br>(20.58 to<br>27.51)                         | 15.74<br>(13.65 to<br>18.06)                         | -1.5<br>(-1.77 to<br>-1.23)                        |
| <b>Malta</b>    | Sickle<br>cell<br>disorders  | 0<br>(0 to 0)                                     | 0<br>(0 to 0)                                     | -0.15<br>(-0.24 to<br>-0.05)                     | 0.21<br>(0.15 to<br>0.3)                             | 0.15<br>(0.11 to<br>0.22)                            | -1.03<br>(-1.32 to<br>-0.74)                       |
| <b>Malta</b>    | Sickle<br>cell trait         | 0<br>(0 to 0)                                     | 0<br>(0 to 0)                                     | -0.19<br>(-0.24 to<br>-0.14)                     | 32.11<br>(26.24 to<br>38.75)                         | 21.87<br>(17.76 to<br>26.68)                         | -1.19<br>(-1.52 to<br>-0.86)                       |



| <b>Regions</b>      | <b>Causes</b>               | <b>Cases in<br/>1990<br/>No.×103<br/>(95% UI)</b> | <b>Cases in<br/>2019<br/>No.×103<br/>(95% UI)</b> | <b>Change in<br/>absolute<br/>number<br/>(%)</b> | <b>Rates in<br/>1990 per<br/>100000<br/>(95% UI)</b> | <b>Rates in<br/>2019 per<br/>100000<br/>(95% UI)</b> | <b>EAPC<br/>from 1990<br/>and 2019<br/>(95%CI)</b> |
|---------------------|-----------------------------|---------------------------------------------------|---------------------------------------------------|--------------------------------------------------|------------------------------------------------------|------------------------------------------------------|----------------------------------------------------|
| Malta               | G6PD<br>deficiency          | 0<br>(0 to 0)                                     | 0<br>(0 to 0)                                     | -0.19<br>(-0.24 to<br>-0.14)                     | 42.73<br>(32.96 to<br>53.14)                         | 29.05<br>(22.33 to<br>36.23)                         | -1.19<br>(-1.58 to<br>-0.79)                       |
| Malta               | G6PD trait                  | 1<br>(1 to 1)                                     | 0<br>(0 to 1)                                     | -0.25<br>(-0.27 to<br>-0.22)                     | 173.19<br>(155.77 to<br>191.36)                      | 110.05<br>(98.57 to<br>121.57)                       | -1.39<br>(-1.73 to<br>-1.04)                       |
| Marshall<br>Islands | Inherited<br>anemias        | 0<br>(0 to 0)                                     | 0<br>(0 to 0)                                     | -0.08<br>(-0.1 to<br>-0.07)                      | 706.18<br>(626.81 to<br>790.95)                      | 523.78<br>(462.99 to<br>583.13)                      | -0.74<br>(-0.85 to<br>-0.63)                       |
| Marshall<br>Islands | Thalassemi<br>as            | 0<br>(0 to 0)                                     | 0<br>(0 to 0)                                     | -0.24<br>(-0.33 to<br>-0.14)                     | 3.94<br>(2.06 to<br>6.15)                            | 2.4<br>(1.29 to<br>3.66)                             | -0.33<br>(-1.26 to<br>0.6)                         |
| Marshall<br>Islands | Thalassemi<br>as trait      | 0<br>(0 to 0)                                     | 0<br>(0 to 0)                                     | -0.19<br>(-0.24 to<br>-0.15)                     | 115.74<br>(87.68 to<br>142)                          | 75.23<br>(57.22 to<br>91.49)                         | -0.78<br>(-1.16 to<br>-0.4)                        |
| Marshall<br>Islands | Sickle<br>cell<br>disorders | 0<br>(0 to 0)                                     | 0<br>(0 to 0)                                     | -0.13<br>(-0.18 to<br>0.55)                      | 0<br>(0 to 0)                                        | 0<br>(0 to 0)                                        | -0.87<br>(-1.04 to<br>-0.7)                        |
| Marshall<br>Islands | Sickle<br>cell trait        | 0<br>(0 to 0)                                     | 0<br>(0 to 0)                                     | -0.14<br>(-0.18 to<br>0.36)                      | 4.41<br>(1.9 to<br>6.8)                              | 3.05<br>(1.26 to<br>4.62)                            | -0.96<br>(-1.11 to<br>-0.82)                       |
| Marshall<br>Islands | G6PD<br>deficiency          | 0<br>(0 to 0)                                     | 0<br>(0 to 0)                                     | 0<br>(-0.06 to<br>0.05)                          | 145.54<br>(111.78 to<br>181.73)                      | 116.91<br>(90.23 to<br>144.9)                        | -0.55<br>(-0.67 to<br>-0.42)                       |
| Marshall<br>Islands | G6PD trait                  | 0<br>(0 to 0)                                     | 0<br>(0 to 0)                                     | -0.07<br>(-0.08 to<br>-0.07)                     | 436.56<br>(392.47 to<br>477.5)                       | 326.19<br>(294.57 to<br>354.95)                      | -0.81<br>(-0.89 to<br>-0.74)                       |
| Mauritania          | Inherited<br>anemias        | 29<br>(27 to 33)                                  | 36<br>(32 to 40)                                  | 0.22<br>(0.19 to<br>0.24)                        | 1424.92<br>(1283.95 to<br>1577.76)                   | 893.16<br>(804.88 to<br>986.19)                      | -1.57<br>(-1.69 to<br>-1.45)                       |
| Mauritania          | Thalassemi<br>as            | 0<br>(0 to 0)                                     | 0<br>(0 to 0)                                     | 0.6<br>(0.37 to<br>0.87)                         | 0.29<br>(0.2 to<br>0.4)                              | 0.24<br>(0.17 to<br>0.33)                            | -0.69<br>(-0.79 to<br>-0.59)                       |
| Mauritania          | Thalassemi<br>as trait      | 2<br>(1 to 2)                                     | 2<br>(2 to 3)                                     | 0.34<br>(0.26 to<br>0.43)                        | 77.97<br>(65.27 to<br>92.82)                         | 53.97<br>(45.29 to<br>64.53)                         | -1.26<br>(-1.38 to<br>-1.15)                       |
| Mauritania          | Sickle<br>cell<br>disorders | 0<br>(0 to 0)                                     | 0<br>(0 to 0)                                     | 0.28<br>(0.18 to<br>0.4)                         | 8.22<br>(6.5 to<br>10.2)                             | 5.4<br>(4.31 to<br>6.67)                             | -1.37<br>(-1.5 to<br>-1.24)                        |
| Mauritania          | Sickle<br>cell trait        | 7<br>(6 to 8)                                     | 9<br>(8 to 10)                                    | 0.24<br>(0.19 to<br>0.31)                        | 335.78<br>(296.32 to<br>377.8)                       | 215.16<br>(190.81 to<br>241.21)                      | -1.48<br>(-1.6 to<br>-1.36)                        |

| <b>Regions</b>    | <b>Causes</b>                | <b>Cases in<br/>1990<br/>No.×103<br/>(95% UI)</b> | <b>Cases in<br/>2019<br/>No.×103<br/>(95% UI)</b> | <b>Change in<br/>absolute<br/>number<br/>(%)</b> | <b>Rates in<br/>1990 per<br/>100000<br/>(95% UI)</b> | <b>Rates in<br/>2019 per<br/>100000<br/>(95% UI)</b> | <b>EAPC<br/>from 1990<br/>and 2019<br/>(95%CI)</b> |
|-------------------|------------------------------|---------------------------------------------------|---------------------------------------------------|--------------------------------------------------|------------------------------------------------------|------------------------------------------------------|----------------------------------------------------|
| <b>Mauritania</b> | G6PD<br>deficiency           | 7<br>(5 to 8)                                     | 8<br>(6 to 10)                                    | 0.17<br>(0.09 to<br>0.25)                        | 321.66<br>(248.29 to<br>406.93)                      | 193.18<br>(149.32 to<br>239.38)                      | -1.68<br>(-1.83 to<br>-1.53)                       |
| <b>Mauritania</b> | G6PD trait                   | 14<br>(13 to 15)                                  | 17<br>(15 to 19)                                  | 0.21<br>(0.19 to<br>0.26)                        | 681<br>(617.61 to<br>743.35)                         | 425.21<br>(385.09 to<br>462.01)                      | -1.61<br>(-1.73 to<br>-1.49)                       |
| <b>Mauritius</b>  | <b>Inherited<br/>anemias</b> | 5<br>(5 to 6)                                     | 3<br>(3 to 3)                                     | -0.46<br>(-0.48 to<br>-0.44)                     | 476.8<br>(429.05 to<br>525.67)                       | 221.82<br>(199.5 to<br>244.63)                       | -3.01<br>(-3.19 to<br>-2.83)                       |
| <b>Mauritius</b>  | Thalassemi<br>as             | 0<br>(0 to 0)                                     | 0<br>(0 to 0)                                     | -0.39<br>(-0.48 to<br>-0.29)                     | 2.51<br>(1.86 to<br>3.43)                            | 1.33<br>(0.94 to<br>1.8)                             | -2.53<br>(-2.69 to<br>-2.37)                       |
| <b>Mauritius</b>  | Thalassemi<br>as trait       | 1<br>(1 to 1)                                     | 1<br>(1 to 1)                                     | -0.37<br>(-0.4 to<br>-0.34)                      | 104.13<br>(88.77 to<br>122.63)                       | 56.82<br>(48.47 to<br>66.22)                         | -2.42<br>(-2.57 to<br>-2.27)                       |
| <b>Mauritius</b>  | Sickle<br>cell<br>disorders  | 0<br>(0 to 0)                                     | 0<br>(0 to 0)                                     | -0.42<br>(-0.54 to<br>-0.32)                     | 0.01<br>(0.01 to<br>0.02)                            | 0.01<br>(0 to 0.01)                                  | -2.76<br>(-2.9 to<br>-2.62)                        |
| <b>Mauritius</b>  | Sickle<br>cell trait         | 0<br>(0 to 0)                                     | 0<br>(0 to 0)                                     | -0.42<br>(-0.49 to<br>-0.36)                     | 9.5<br>(7.97 to<br>11.35)                            | 4.72<br>(3.95 to<br>5.63)                            | -2.74<br>(-2.89 to<br>-2.6)                        |
| <b>Mauritius</b>  | G6PD<br>deficiency           | 1<br>(1 to 1)                                     | 0<br>(0 to 1)                                     | -0.41<br>(-0.45 to<br>-0.37)                     | 72.95<br>(56.03 to<br>90.96)                         | 37.31<br>(28.7 to<br>46.36)                          | -2.9<br>(-3.09 to<br>-2.7)                         |
| <b>Mauritius</b>  | G6PD trait                   | 3<br>(3 to 3)                                     | 2<br>(1 to 2)                                     | -0.51<br>(-0.53 to<br>-0.49)                     | 287.68<br>(259.1 to<br>313.84)                       | 121.64<br>(109.04 to<br>133.17)                      | -3.29<br>(-3.52 to<br>-3.07)                       |
| <b>Mexico</b>     | <b>Inherited<br/>anemias</b> | 425<br>(414 to<br>436)                            | 245<br>(238 to<br>253)                            | -0.42<br>(-0.43 to<br>-0.42)                     | 496.96<br>(484.47 to<br>510.6)                       | 195.9<br>(190.21 to<br>202.59)                       | -3.19<br>(-3.56 to<br>-2.82)                       |
| <b>Mexico</b>     | Thalassemi<br>as             | 0<br>(0 to 0)                                     | 0<br>(0 to 0)                                     | 0.31<br>(-0.2 to<br>1.51)                        | 0.02<br>(0.01 to<br>0.03)                            | 0.02<br>(0.01 to<br>0.02)                            | -0.41<br>(-0.59 to<br>-0.23)                       |
| <b>Mexico</b>     | Thalassemi<br>as trait       | 10<br>(6 to 16)                                   | 10<br>(6 to 15)                                   | -0.04<br>(-0.24 to<br>0.26)                      | 12.05<br>(7.22 to<br>18.54)                          | 7.9<br>(5.04 to<br>11.62)                            | -1.53<br>(-1.62 to<br>-1.45)                       |
| <b>Mexico</b>     | Sickle<br>cell<br>disorders  | 0<br>(0 to 0)                                     | 0<br>(0 to 0)                                     | -0.36<br>(-0.51 to<br>-0.21)                     | 0.08<br>(0.05 to<br>0.13)                            | 0.04<br>(0.02 to<br>0.06)                            | -2.47<br>(-2.73 to<br>-2.2)                        |
| <b>Mexico</b>     | Sickle<br>cell trait         | 20<br>(15 to 27)                                  | 15<br>(12 to 20)                                  | -0.24<br>(-0.32 to<br>-0.16)                     | 23.67<br>(17.61 to<br>31.43)                         | 12.26<br>(9.54 to<br>16.02)                          | -2.1<br>(-2.18 to<br>-2.02)                        |

| <b>Regions</b>                                  | <b>Causes</b>                | <b>Cases in<br/>1990<br/>No.×103<br/>(95% UI)</b> | <b>Cases in<br/>2019<br/>No.×103<br/>(95% UI)</b> | <b>Change in<br/>absolute<br/>number<br/>(%)</b> | <b>Rates in<br/>1990 per<br/>100000<br/>(95% UI)</b> | <b>Rates in<br/>2019 per<br/>100000<br/>(95% UI)</b> | <b>EAPC<br/>from 1990<br/>and 2019<br/>(95%CI)</b> |
|-------------------------------------------------|------------------------------|---------------------------------------------------|---------------------------------------------------|--------------------------------------------------|------------------------------------------------------|------------------------------------------------------|----------------------------------------------------|
| <b>Mexico</b>                                   | G6PD<br>deficiency           | 54<br>(51 to 56)                                  | 23<br>(22 to 24)                                  | -0.57<br>(-0.58 to<br>-0.56)                     | 62.71<br>(60.17 to<br>65.08)                         | 18.45<br>(17.54 to<br>19.31)                         | -3.65<br>(-4.24 to<br>-3.05)                       |
| <b>Mexico</b>                                   | G6PD trait                   | 341<br>(334 to<br>346)                            | 196<br>(192 to<br>200)                            | -0.42<br>(-0.43 to<br>-0.42)                     | 398.44<br>(390.86 to<br>404.94)                      | 157.24<br>(153.81 to<br>160.44)                      | -3.26<br>(-3.65 to<br>-2.87)                       |
| <b>Micronesia<br/>(Federated<br/>States of)</b> | <b>Inherited<br/>anemias</b> | 1<br>(1 to 1)                                     | 0<br>(0 to 1)                                     | -0.35<br>(-0.36 to<br>-0.34)                     | 688.71<br>(613.51 to<br>766.46)                      | 457.07<br>(406.67 to<br>510.72)                      | -1.38<br>(-1.61 to<br>-1.14)                       |
| <b>Micronesia<br/>(Federated<br/>States of)</b> | Thalassemi<br>as             | 0<br>(0 to 0)                                     | 0<br>(0 to 0)                                     | -0.49<br>(-0.57 to<br>-0.41)                     | 3.99<br>(2.09 to<br>6.05)                            | 2.06<br>(1.1 to<br>3.12)                             | -1.22<br>(-2.14 to<br>-0.28)                       |
| <b>Micronesia<br/>(Federated<br/>States of)</b> | Thalassemi<br>as trait       | 0<br>(0 to 0)                                     | 0<br>(0 to 0)                                     | -0.46<br>(-0.5 to<br>-0.42)                      | 117.61<br>(89.26 to<br>142.36)                       | 65.08<br>(49.9 to<br>78.91)                          | -1.61<br>(-1.98 to<br>-1.23)                       |
| <b>Micronesia<br/>(Federated<br/>States of)</b> | Sickle<br>cell<br>disorders  | 0<br>(0 to 0)                                     | 0<br>(0 to 0)                                     | -0.41<br>(-0.45 to<br>0.14)                      | 0<br>(0 to 0)                                        | 0<br>(0 to 0)                                        | -1.63<br>(-1.77 to<br>-1.5)                        |
| <b>Micronesia<br/>(Federated<br/>States of)</b> | Sickle<br>cell trait         | 0<br>(0 to 0)                                     | 0<br>(0 to 0)                                     | -0.42<br>(-0.45 to<br>0.12)                      | 4.46<br>(1.82 to<br>6.82)                            | 2.66<br>(1.09 to<br>4.16)                            | -1.73<br>(-1.84 to<br>-1.63)                       |
| <b>Micronesia<br/>(Federated<br/>States of)</b> | G6PD<br>deficiency           | 0<br>(0 to 0)                                     | 0<br>(0 to 0)                                     | -0.13<br>(-0.18 to<br>-0.09)                     | 115.6<br>(88.8 to<br>144.18)                         | 102.26<br>(79.24 to<br>127.85)                       | -0.43<br>(-0.95 to<br>0.09)                        |
| <b>Micronesia<br/>(Federated<br/>States of)</b> | G6PD trait                   | 0<br>(0 to 1)                                     | 0<br>(0 to 0)                                     | -0.38<br>(-0.38 to<br>-0.37)                     | 447.04<br>(401.88 to<br>488.9)                       | 285<br>(258.07 to<br>310.03)                         | -1.61<br>(-1.77 to<br>-1.44)                       |
| <b>Monaco</b>                                   | <b>Inherited<br/>anemias</b> | 0<br>(0 to 0)                                     | 0<br>(0 to 0)                                     | -0.12<br>(-0.15 to<br>-0.09)                     | 193.77<br>(173.92 to<br>214.12)                      | 137.46<br>(122.97 to<br>152.61)                      | -1.32<br>(-1.42 to<br>-1.21)                       |
| <b>Monaco</b>                                   | Thalassemi<br>as             | 0<br>(0 to 0)                                     | 0<br>(0 to 0)                                     | -0.17<br>(-0.27 to<br>-0.04)                     | 0.16<br>(0.11 to<br>0.22)                            | 0.11<br>(0.07 to<br>0.15)                            | -2.35<br>(-3.15 to<br>-1.55)                       |
| <b>Monaco</b>                                   | Thalassemi<br>as trait       | 0<br>(0 to 0)                                     | 0<br>(0 to 0)                                     | -0.1<br>(-0.16 to<br>-0.04)                      | 17.89<br>(15.52 to<br>20.58)                         | 13<br>(11.25 to<br>14.97)                            | -1.45<br>(-1.65 to<br>-1.24)                       |
| <b>Monaco</b>                                   | Sickle<br>cell<br>disorders  | 0<br>(0 to 0)                                     | 0<br>(0 to 0)                                     | -0.15<br>(-0.25 to<br>-0.05)                     | 0.21<br>(0.15 to<br>0.28)                            | 0.14<br>(0.1 to<br>0.2)                              | -1.46<br>(-1.57 to<br>-1.35)                       |
| <b>Monaco</b>                                   | Sickle<br>cell trait         | 0<br>(0 to 0)                                     | 0<br>(0 to 0)                                     | -0.14<br>(-0.2 to<br>-0.07)                      | 24.96<br>(20.43 to<br>30.3)                          | 17.37<br>(14.18 to<br>21.04)                         | -1.39<br>(-1.5 to<br>-1.28)                        |

| Regions    | Causes                | Cases in 1990<br>No.×103<br>(95% UI) | Cases in 2019<br>No.×103<br>(95% UI) | Change in absolute number<br>(%) | Rates in 1990 per 100000<br>(95% UI) | Rates in 2019 per 100000<br>(95% UI) | EAPC from 1990 and 2019<br>(95%CI) |
|------------|-----------------------|--------------------------------------|--------------------------------------|----------------------------------|--------------------------------------|--------------------------------------|------------------------------------|
| Monaco     | G6PD deficiency       | 0<br>(0 to 0)                        | 0<br>(0 to 0)                        | -0.08<br>(-0.11 to -0.04)        | 29.43<br>(22.64 to 36.67)            | 21.92<br>(16.84 to 27.52)            | -1.15<br>(-1.3 to -1.01)           |
| Monaco     | G6PD trait            | 0<br>(0 to 0)                        | 0<br>(0 to 0)                        | -0.13<br>(-0.17 to -0.09)        | 121.13<br>(108.6 to 134.13)          | 84.92<br>(76.01 to 93.5)             | -1.32<br>(-1.42 to -1.22)          |
| Mongolia   | Inherited anemias     | 11<br>(10 to 12)                     | 12<br>(11 to 14)                     | 0.12<br>(0.08 to 0.15)           | 519.01<br>(464.99 to 578.24)         | 368.07<br>(329 to 408.49)            | -0.23<br>(-0.69 to 0.24)           |
| Mongolia   | Thalassemias          | 0<br>(0 to 0)                        | 0<br>(0 to 0)                        | -0.12<br>(-0.22 to 0)            | 4.48<br>(3.24 to 6.29)               | 2.51<br>(1.82 to 3.43)               | -1.02<br>(-1.51 to -0.54)          |
| Mongolia   | Thalassemias trait    | 4<br>(3 to 5)                        | 4<br>(4 to 5)                        | 0.12<br>(0.04 to 0.21)           | 183.19<br>(152.34 to 223.11)         | 130.71<br>(109.27 to 157.63)         | -0.23<br>(-0.71 to 0.24)           |
| Mongolia   | Sickle cell disorders | 0<br>(0 to 0)                        | 0<br>(0 to 0)                        | 0.12<br>(-0.08 to 0.27)          | 0.02<br>(0.01 to 0.03)               | 0.02<br>(0.01 to 0.02)               | -0.22<br>(-0.69 to 0.25)           |
| Mongolia   | Sickle cell trait     | 0<br>(0 to 0)                        | 0<br>(0 to 0)                        | 0.12<br>(0.01 to 0.2)            | 16.29<br>(12.82 to 20.19)            | 11.57<br>(9.09 to 14.37)             | -0.23<br>(-0.69 to 0.24)           |
| Mongolia   | G6PD deficiency       | 1<br>(1 to 1)                        | 1<br>(1 to 1)                        | 0.13<br>(0.05 to 0.2)            | 46.68<br>(36.06 to 59.08)            | 33.67<br>(26.04 to 42.66)            | -0.11<br>(-0.59 to 0.38)           |
| Mongolia   | G6PD trait            | 6<br>(5 to 6)                        | 6<br>(6 to 7)                        | 0.11<br>(0.11 to 0.11)           | 268.35<br>(239.05 to 299.06)         | 189.59<br>(168.89 to 211.29)         | -0.23<br>(-0.69 to 0.24)           |
| Montenegro | Inherited anemias     | 1<br>(1 to 2)                        | 1<br>(1 to 1)                        | -0.29<br>(-0.3 to -0.29)         | 223.36<br>(197.11 to 252.05)         | 158.96<br>(140.22 to 179.87)         | -1.31<br>(-1.38 to -1.24)          |
| Montenegro | Thalassemias          | 0<br>(0 to 0)                        | 0<br>(0 to 0)                        | -0.57<br>(-0.62 to -0.5)         | 1.21<br>(0.79 to 1.89)               | 0.52<br>(0.36 to 0.79)               | -2.8<br>(-2.84 to -2.75)           |
| Montenegro | Thalassemias trait    | 0<br>(0 to 0)                        | 0<br>(0 to 0)                        | -0.28<br>(-0.33 to -0.23)        | 28.78<br>(23.97 to 35.47)            | 20.89<br>(17.5 to 25.05)             | -1.07<br>(-1.11 to -1.02)          |
| Montenegro | Sickle cell disorders | 0<br>(0 to 0)                        | 0<br>(0 to 0)                        | -0.23<br>(-0.3 to -0.14)         | 0.13<br>(0.1 to 0.17)                | 0.1<br>(0.07 to 0.13)                | -0.88<br>(-1.08 to -0.67)          |
| Montenegro | Sickle cell trait     | 0<br>(0 to 0)                        | 0<br>(0 to 0)                        | -0.27<br>(-0.31 to -0.24)        | 26.59<br>(22.82 to 30.69)            | 19.48<br>(16.72 to 22.54)            | -1.02<br>(-1.13 to -0.92)          |

| <b>Regions</b> | <b>Causes</b>               | <b>Cases in<br/>1990<br/>No.×103<br/>(95% UI)</b> | <b>Cases in<br/>2019<br/>No.×103<br/>(95% UI)</b> | <b>Change in<br/>absolute<br/>number<br/>(%)</b> | <b>Rates in<br/>1990 per<br/>100000<br/>(95% UI)</b> | <b>Rates in<br/>2019 per<br/>100000<br/>(95% UI)</b> | <b>EAPC<br/>from 1990<br/>and 2019<br/>(95%CI)</b> |
|----------------|-----------------------------|---------------------------------------------------|---------------------------------------------------|--------------------------------------------------|------------------------------------------------------|------------------------------------------------------|----------------------------------------------------|
| Montenegro     | G6PD<br>deficiency          | 0<br>(0 to 0)                                     | 0<br>(0 to 0)                                     | -0.25<br>(-0.26 to<br>-0.25)                     | 54.82<br>(42.44 to<br>68.64)                         | 41.38<br>(32.02 to<br>51.8)                          | -1.86<br>(-2.2 to<br>-1.51)                        |
| Montenegro     | G6PD trait                  | 1<br>(1 to 1)                                     | 0<br>(0 to 1)                                     | -0.32<br>(-0.32 to<br>-0.32)                     | 111.84<br>(99.09 to<br>125.12)                       | 76.58<br>(67.85 to<br>85.68)                         | -1.2<br>(-1.24 to<br>-1.15)                        |
| Morocco        | Inherited<br>anemias        | 261<br>(238 to<br>285)                            | 199<br>(182 to<br>218)                            | -0.24<br>(-0.25 to<br>-0.22)                     | 1030.88<br>(942.05 to<br>1126.59)                    | 553.66<br>(506.5 to<br>605.88)                       | -2.04<br>(-2.22 to<br>-1.85)                       |
| Morocco        | Thalassemi<br>as            | 1<br>(1 to 1)                                     | 1<br>(1 to 1)                                     | -0.23<br>(-0.3 to<br>-0.15)                      | 3.69<br>(2.93 to<br>4.77)                            | 2.01<br>(1.57 to<br>2.58)                            | -2<br>(-2.19 to<br>-1.8)                           |
| Morocco        | Thalassemi<br>as trait      | 56<br>(51 to 64)                                  | 44<br>(39 to 49)                                  | -0.22<br>(-0.25 to<br>-0.19)                     | 222.7<br>(200.31 to<br>251.51)                       | 122.1<br>(109.07 to<br>137.33)                       | -1.98<br>(-2.17 to<br>-1.79)                       |
| Morocco        | Sickle<br>cell<br>disorders | 0<br>(0 to 0)                                     | 0<br>(0 to 0)                                     | -0.25<br>(-0.29 to<br>-0.2)                      | 1.11<br>(0.93 to<br>1.31)                            | 0.59<br>(0.49 to<br>0.7)                             | -2.08<br>(-2.27 to<br>-1.89)                       |
| Morocco        | Sickle<br>cell trait        | 29<br>(27 to 32)                                  | 22<br>(20 to 24)                                  | -0.25<br>(-0.27 to<br>-0.22)                     | 114.64<br>(105.02 to<br>125.02)                      | 60.82<br>(55.69 to<br>66.58)                         | -2.08<br>(-2.27 to<br>-1.89)                       |
| Morocco        | G6PD<br>deficiency          | 45<br>(35 to 56)                                  | 34<br>(26 to 43)                                  | -0.24<br>(-0.28 to<br>-0.2)                      | 178.75<br>(137.69 to<br>222.85)                      | 95.31<br>(73.67 to<br>120.14)                        | -2.05<br>(-2.23 to<br>-1.86)                       |
| Morocco        | G6PD trait                  | 129<br>(117 to<br>140)                            | 98<br>(89 to 107)                                 | -0.24<br>(-0.26 to<br>-0.22)                     | 510<br>(462.17 to<br>552.9)                          | 272.84<br>(247.72 to<br>296.71)                      | -2.05<br>(-2.23 to<br>-1.87)                       |
| Mozambique     | Inherited<br>anemias        | 206<br>(193 to<br>221)                            | 371<br>(323 to<br>422)                            | 0.8<br>(0.68 to<br>0.91)                         | 1579.19<br>(1473.38 to<br>1692.03)                   | 1255.2<br>(1094.38 to<br>1429.86)                    | -0.9<br>(-1.08 to<br>-0.72)                        |
| Mozambique     | Thalassemi<br>as            | 0<br>(0 to 0)                                     | 0<br>(0 to 0)                                     | 3.2<br>(2.69 to<br>3.93)                         | 0.1<br>(0.06 to<br>0.15)                             | 0.18<br>(0.1 to<br>0.27)                             | 1.71<br>(1.44 to<br>1.98)                          |
| Mozambique     | Thalassemi<br>as trait      | 4<br>(3 to 4)                                     | 9<br>(7 to 11)                                    | 1.59<br>(1.41 to<br>1.8)                         | 27.2<br>(21.46 to<br>33.22)                          | 31.18<br>(24.58 to<br>37.9)                          | 0.2<br>(0.02 to<br>0.38)                           |
| Mozambique     | Sickle<br>cell<br>disorders | 0<br>(0 to 0)                                     | 0<br>(0 to 0)                                     | 0.9<br>(0.79 to<br>1.01)                         | 1<br>(0.81 to<br>1.21)                               | 0.85<br>(0.69 to<br>1.02)                            | -0.72<br>(-0.85 to<br>-0.58)                       |
| Mozambique     | Sickle<br>cell trait        | 17<br>(15 to 19)                                  | 31<br>(28 to 35)                                  | 0.88<br>(0.82 to<br>0.94)                        | 127.87<br>(114.37 to<br>141.77)                      | 106.54<br>(95.58 to<br>117.8)                        | -0.76<br>(-0.9 to<br>-0.62)                        |

| <b>Regions</b>    | <b>Causes</b>                | <b>Cases in<br/>1990<br/>No.×103<br/>(95% UI)</b> | <b>Cases in<br/>2019<br/>No.×103<br/>(95% UI)</b> | <b>Change in<br/>absolute<br/>number<br/>(%)</b> | <b>Rates in<br/>1990 per<br/>100000<br/>(95% UI)</b> | <b>Rates in<br/>2019 per<br/>100000<br/>(95% UI)</b> | <b>EAPC<br/>from 1990<br/>and 2019<br/>(95%CI)</b> |
|-------------------|------------------------------|---------------------------------------------------|---------------------------------------------------|--------------------------------------------------|------------------------------------------------------|------------------------------------------------------|----------------------------------------------------|
| <b>Mozambique</b> | G6PD<br>deficiency           | 75<br>(69 to 81)                                  | 134<br>(104 to 169)                               | 0.79<br>(0.48 to 1.11)                           | 570.42<br>(526.84 to 618.17)                         | 453.18<br>(351.45 to 572.59)                         | -0.92<br>(-1.11 to -0.73)                          |
| <b>Mozambique</b> | G6PD trait                   | 111<br>(102 to 120)                               | 196<br>(179 to 211)                               | 0.76<br>(0.72 to 0.79)                           | 852.6<br>(780.68 to 916.97)                          | 663.27<br>(604.95 to 714.75)                         | -0.96<br>(-1.14 to -0.77)                          |
| <b>Myanmar</b>    | <b>Inherited<br/>anemias</b> | 467<br>(418 to 517)                               | 382<br>(344 to 422)                               | -0.18<br>(-0.21 to -0.16)                        | 1135.73<br>(1017.39 to 1257.77)                      | 697.79<br>(629.24 to 771)                            | -0.84<br>(-1.28 to -0.39)                          |
| <b>Myanmar</b>    | Thalassemi<br>as             | 4<br>(3 to 5)                                     | 5<br>(4 to 6)                                     | 0.29<br>(0.19 to 0.39)                           | 8.86<br>(7.03 to 11.31)                              | 8.58<br>(6.65 to 11.11)                              | -0.07<br>(-0.11 to -0.04)                          |
| <b>Myanmar</b>    | Thalassemi<br>as trait       | 104<br>(95 to 115)                                | 96<br>(87 to 106)                                 | -0.08<br>(-0.11 to -0.05)                        | 252.24<br>(230.25 to 279.87)                         | 175.06<br>(159.55 to 194.15)                         | -1.23<br>(-1.26 to -1.2)                           |
| <b>Myanmar</b>    | Sickle<br>cell<br>disorders  | 0<br>(0 to 0)                                     | 0<br>(0 to 0)                                     | -0.21<br>(-0.31 to -0.03)                        | 0.03<br>(0.02 to 0.04)                               | 0.02<br>(0.01 to 0.02)                               | -1.75<br>(-1.8 to -1.7)                            |
| <b>Myanmar</b>    | Sickle<br>cell trait         | 8<br>(6 to 9)                                     | 6<br>(5 to 7)                                     | -0.21<br>(-0.26 to -0.12)                        | 18.31<br>(15.05 to 21.93)                            | 10.83<br>(8.95 to 12.79)                             | -1.77<br>(-1.8 to -1.73)                           |
| <b>Myanmar</b>    | G6PD<br>deficiency           | 120<br>(93 to 150)                                | 94<br>(73 to 117)                                 | -0.21<br>(-0.26 to -0.15)                        | 291.25<br>(225.81 to 364.79)                         | 172.65<br>(133.72 to 214.17)                         | 0.15<br>(-0.87 to 1.18)                            |
| <b>Myanmar</b>    | G6PD trait                   | 232<br>(212 to 251)                               | 181<br>(165 to 195)                               | -0.22<br>(-0.25 to -0.2)                         | 565.04<br>(515.39 to 610.37)                         | 330.65<br>(302.27 to 356.67)                         | -1.13<br>(-1.5 to -0.76)                           |
| <b>Namibia</b>    | <b>Inherited<br/>anemias</b> | 14<br>(12 to 16)                                  | 18<br>(16 to 20)                                  | 0.26<br>(0.22 to 0.3)                            | 1008.23<br>(884.88 to 1128.88)                       | 746.38<br>(656.12 to 843.43)                         | -0.91<br>(-0.98 to -0.84)                          |
| <b>Namibia</b>    | Thalassemi<br>as             | 0<br>(0 to 0)                                     | 0<br>(0 to 0)                                     | 1.74<br>(1.3 to 2.26)                            | 0.07<br>(0.05 to 0.1)                                | 0.11<br>(0.07 to 0.17)                               | 1.47<br>(1.33 to 1.62)                             |
| <b>Namibia</b>    | Thalassemi<br>as trait       | 0<br>(0 to 0)                                     | 1<br>(0 to 1)                                     | 0.68<br>(0.54 to 0.83)                           | 25.47<br>(21.42 to 29.81)                            | 25.07<br>(20.46 to 29.56)                            | -0.06<br>(-0.12 to 0)                              |
| <b>Namibia</b>    | Sickle<br>cell<br>disorders  | 0<br>(0 to 0)                                     | 0<br>(0 to 0)                                     | 0.21<br>(0.11 to 0.3)                            | 0.27<br>(0.2 to 0.36)                                | 0.19<br>(0.14 to 0.25)                               | -0.87<br>(-1.14 to -0.61)                          |
| <b>Namibia</b>    | Sickle<br>cell trait         | 1<br>(1 to 1)                                     | 1<br>(1 to 1)                                     | 0.25<br>(0.19 to 0.31)                           | 56.4<br>(48.16 to 65.96)                             | 41.45<br>(35.28 to 48.25)                            | -0.85<br>(-1.01 to -0.69)                          |

| <b>Regions</b> | <b>Causes</b>               | <b>Cases in<br/>1990<br/>No.×103<br/>(95% UI)</b> | <b>Cases in<br/>2019<br/>No.×103<br/>(95% UI)</b> | <b>Change in<br/>absolute<br/>number<br/>(%)</b> | <b>Rates in<br/>1990 per<br/>100000<br/>(95% UI)</b> | <b>Rates in<br/>2019 per<br/>100000<br/>(95% UI)</b> | <b>EAPC<br/>from 1990<br/>and 2019<br/>(95%CI)</b> |
|----------------|-----------------------------|---------------------------------------------------|---------------------------------------------------|--------------------------------------------------|------------------------------------------------------|------------------------------------------------------|----------------------------------------------------|
| Namibia        | G6PD<br>deficiency          | 4<br>(3 to 5)                                     | 5<br>(4 to 7)                                     | 0.21<br>(0.13 to<br>0.3)                         | 314.76<br>(243.74 to<br>388.48)                      | 223.09<br>(172.9 to<br>281.47)                       | -1.07<br>(-1.17 to<br>-0.98)                       |
| Namibia        | G6PD trait                  | 9<br>(8 to 9)                                     | 11<br>(10 to 12)                                  | 0.27<br>(0.23 to<br>0.31)                        | 611.27<br>(560.23 to<br>659.57)                      | 456.46<br>(416.59 to<br>495.47)                      | -0.88<br>(-0.94 to<br>-0.82)                       |
| Nauru          | Inherited<br>anemias        | 0<br>(0 to 0)                                     | 0<br>(0 to 0)                                     | -0.23<br>(-0.25 to<br>-0.21)                     | 926.81<br>(822.79 to<br>1032.51)                     | 695.82<br>(617.09 to<br>777.52)                      | -0.99<br>(-1.12 to<br>-0.86)                       |
| Nauru          | Thalassemi<br>as            | 0<br>(0 to 0)                                     | 0<br>(0 to 0)                                     | -0.37<br>(-0.44 to<br>-0.27)                     | 5.43<br>(3.01 to<br>8.14)                            | 3.31<br>(1.79 to<br>5.11)                            | -0.6<br>(-1.52 to<br>0.34)                         |
| Nauru          | Thalassemi<br>as trait      | 0<br>(0 to 0)                                     | 0<br>(0 to 0)                                     | -0.33<br>(-0.36 to<br>-0.28)                     | 153.61<br>(118.26 to<br>185.17)                      | 100.75<br>(77.29 to<br>123.17)                       | -1.03<br>(-1.4 to<br>-0.66)                        |
| Nauru          | Sickle<br>cell<br>disorders | 0<br>(0 to 0)                                     | 0<br>(0 to 0)                                     | -0.28<br>(-0.31 to<br>0.08)                      | 0<br>(0 to 0.01)                                     | 0<br>(0 to 0)                                        | -1.18<br>(-1.37 to<br>-1)                          |
| Nauru          | Sickle<br>cell trait        | 0<br>(0 to 0)                                     | 0<br>(0 to 0)                                     | -0.29<br>(-0.31 to<br>-0.02)                     | 5.69<br>(2.44 to<br>8.79)                            | 3.93<br>(1.64 to<br>5.97)                            | -1.25<br>(-1.39 to<br>-1.11)                       |
| Nauru          | G6PD<br>deficiency          | 0<br>(0 to 0)                                     | 0<br>(0 to 0)                                     | -0.16<br>(-0.21 to<br>-0.11)                     | 191.98<br>(148.31 to<br>238.3)                       | 157.2<br>(121.34 to<br>198.57)                       | -0.77<br>(-0.95 to<br>-0.59)                       |
| Nauru          | G6PD trait                  | 0<br>(0 to 0)                                     | 0<br>(0 to 0)                                     | -0.22<br>(-0.25 to<br>-0.2)                      | 570.09<br>(512.78 to<br>623.39)                      | 430.63<br>(389.59 to<br>468.6)                       | -1.06<br>(-1.17 to<br>-0.96)                       |
| Nepal          | Inherited<br>anemias        | 104<br>(93 to 116)                                | 82<br>(74 to 91)                                  | -0.21<br>(-0.23 to<br>-0.19)                     | 532.1<br>(476.62 to<br>594.08)                       | 270.22<br>(242.11 to<br>300.64)                      | -2.38<br>(-2.52 to<br>-2.24)                       |
| Nepal          | Thalassemi<br>as            | 0<br>(0 to 0)                                     | 0<br>(0 to 0)                                     | 0.23<br>(0.13 to<br>0.32)                        | 0.78<br>(0.58 to<br>1.01)                            | 0.62<br>(0.45 to<br>0.82)                            | -1.11<br>(-1.22 to<br>-1)                          |
| Nepal          | Thalassemi<br>as trait      | 19<br>(16 to 21)                                  | 16<br>(14 to 18)                                  | -0.13<br>(-0.16 to<br>-0.1)                      | 95.3<br>(83.47 to<br>108.24)                         | 53.51<br>(46.77 to<br>60.51)                         | -2.26<br>(-2.37 to<br>-2.16)                       |
| Nepal          | Sickle<br>cell<br>disorders | 0<br>(0 to 0)                                     | 0<br>(0 to 0)                                     | -0.08<br>(-0.23 to<br>0.16)                      | 0.09<br>(0.06 to<br>0.12)                            | 0.05<br>(0.04 to<br>0.07)                            | -1.79<br>(-1.91 to<br>-1.66)                       |
| Nepal          | Sickle<br>cell trait        | 6<br>(5 to 7)                                     | 4<br>(3 to 6)                                     | -0.25<br>(-0.3 to<br>-0.18)                      | 30.16<br>(23.53 to<br>38.18)                         | 14.53<br>(11.44 to<br>18.34)                         | -2.74<br>(-2.83 to<br>-2.65)                       |

| <b>Regions</b> | <b>Causes</b>               | <b>Cases in<br/>1990<br/>No.×103<br/>(95% UI)</b> | <b>Cases in<br/>2019<br/>No.×103<br/>(95% UI)</b> | <b>Change in<br/>absolute<br/>number<br/>(%)</b> | <b>Rates in<br/>1990 per<br/>100000<br/>(95% UI)</b> | <b>Rates in<br/>2019 per<br/>100000<br/>(95% UI)</b> | <b>EAPC<br/>from 1990<br/>and 2019<br/>(95%CI)</b> |
|----------------|-----------------------------|---------------------------------------------------|---------------------------------------------------|--------------------------------------------------|------------------------------------------------------|------------------------------------------------------|----------------------------------------------------|
| Nepal          | G6PD<br>deficiency          | 14<br>(11 to 18)                                  | 12<br>(9 to 15)                                   | -0.18<br>(-0.22 to<br>-0.12)                     | 73.05<br>(56.58 to<br>90.86)                         | 38.47<br>(29.65 to<br>48.01)                         | -1.99<br>(-2.31 to<br>-1.66)                       |
| Nepal          | G6PD trait                  | 65<br>(58 to 72)                                  | 50<br>(44 to 56)                                  | -0.24<br>(-0.27 to<br>-0.21)                     | 332.72<br>(296.84 to<br>369.94)                      | 163.04<br>(145.28 to<br>182.61)                      | -2.46<br>(-2.6 to<br>-2.33)                        |
| Netherlands    | Inherited<br>anemias        | 32<br>(29 to 36)                                  | 29<br>(26 to 32)                                  | -0.11<br>(-0.15 to<br>-0.07)                     | 216.72<br>(192.79 to<br>241.95)                      | 166.94<br>(148.95 to<br>186.74)                      | -1<br>(-1.18 to<br>-0.82)                          |
| Netherlands    | Thalassemi<br>as            | 0<br>(0 to 0)                                     | 0<br>(0 to 0)                                     | -0.19<br>(-0.33 to<br>-0.03)                     | 0.15<br>(0.1 to<br>0.22)                             | 0.11<br>(0.07 to<br>0.16)                            | -2.21<br>(-3.15 to<br>-1.26)                       |
| Netherlands    | Thalassemi<br>as trait      | 3<br>(2 to 3)                                     | 2<br>(2 to 3)                                     | -0.1<br>(-0.16 to<br>-0.04)                      | 17.61<br>(15.09 to<br>20.3)                          | 13.77<br>(11.83 to<br>15.87)                         | -1.09<br>(-1.49 to<br>-0.69)                       |
| Netherlands    | Sickle<br>cell<br>disorders | 0<br>(0 to 0)                                     | 0<br>(0 to 0)                                     | -0.09<br>(-0.19 to<br>0.03)                      | 0.03<br>(0.02 to<br>0.03)                            | 0.02<br>(0.02 to<br>0.03)                            | 1.44<br>(0.22 to<br>2.67)                          |
| Netherlands    | Sickle<br>cell trait        | 1<br>(1 to 2)                                     | 1<br>(1 to 1)                                     | -0.09<br>(-0.14 to<br>0.01)                      | 9.16<br>(7.74 to<br>10.98)                           | 7.22<br>(6.14 to<br>8.67)                            | 0.58<br>(-0.2 to<br>1.37)                          |
| Netherlands    | G6PD<br>deficiency          | 5<br>(4 to 7)                                     | 5<br>(4 to 6)                                     | -0.07<br>(-0.13 to<br>-0.02)                     | 36.51<br>(28.03 to<br>45.89)                         | 29.56<br>(22.97 to<br>36.94)                         | -0.95<br>(-1.09 to<br>-0.82)                       |
| Netherlands    | G6PD trait                  | 23<br>(20 to 25)                                  | 20<br>(18 to 22)                                  | -0.13<br>(-0.17 to<br>-0.08)                     | 153.26<br>(137.35 to<br>169.69)                      | 116.25<br>(104.19 to<br>128.74)                      | -1.13<br>(-1.27 to<br>-0.98)                       |
| New Zealand    | Inherited<br>anemias        | 9<br>(8 to 11)                                    | 7<br>(6 to 8)                                     | -0.28<br>(-0.32 to<br>-0.22)                     | 277.74<br>(242.26 to<br>322.23)                      | 152.61<br>(137.95 to<br>170.27)                      | -2.18<br>(-2.87 to<br>-1.49)                       |
| New Zealand    | Thalassemi<br>as            | 0<br>(0 to 0)                                     | 0<br>(0 to 0)                                     | -0.03<br>(-0.12 to<br>0.07)                      | 1.17<br>(0.8 to<br>1.8)                              | 0.86<br>(0.59 to<br>1.31)                            | -0.89<br>(-1.03 to<br>-0.76)                       |
| New Zealand    | Thalassemi<br>as trait      | 1<br>(1 to 1)                                     | 1<br>(1 to 1)                                     | 0.07<br>(0 to 0.15)                              | 26.39<br>(22.13 to<br>30.83)                         | 21.52<br>(18.49 to<br>24.69)                         | -0.59<br>(-0.72 to<br>-0.46)                       |
| New Zealand    | Sickle<br>cell<br>disorders | 0<br>(0 to 1)                                     | 0<br>(0 to 0)                                     | -0.74<br>(-0.78 to<br>-0.67)                     | 14.61<br>(9.56 to<br>22.07)                          | 2.93<br>(2.07 to<br>4.19)                            | -6.97<br>(-9.25 to<br>-4.63)                       |
| New Zealand    | Sickle<br>cell trait        | 7<br>(5 to 8)                                     | 4<br>(3 to 5)                                     | -0.39<br>(-0.44 to<br>-0.34)                     | 190.97<br>(160.2 to<br>227.76)                       | 87.86<br>(75.12 to<br>104.17)                        | -3.29<br>(-4.31 to<br>-2.26)                       |



| <b>Regions</b> | <b>Causes</b>               | <b>Cases in<br/>1990<br/>No.×103<br/>(95% UI)</b> | <b>Cases in<br/>2019<br/>No.×103<br/>(95% UI)</b> | <b>Change in<br/>absolute<br/>number<br/>(%)</b> | <b>Rates in<br/>1990 per<br/>100000<br/>(95% UI)</b> | <b>Rates in<br/>2019 per<br/>100000<br/>(95% UI)</b> | <b>EAPC<br/>from 1990<br/>and 2019<br/>(95%CI)</b> |
|----------------|-----------------------------|---------------------------------------------------|---------------------------------------------------|--------------------------------------------------|------------------------------------------------------|------------------------------------------------------|----------------------------------------------------|
| New Zealand    | G6PD<br>deficiency          | 0<br>(0 to 0)                                     | 0<br>(0 to 0)                                     | 0.13<br>(0.09 to<br>0.16)                        | 2.57<br>(2.44 to<br>2.72)                            | 2.2<br>(2.08 to<br>2.33)                             | -0.41<br>(-0.58 to<br>-0.24)                       |
| New Zealand    | G6PD trait                  | 1<br>(1 to 2)                                     | 2<br>(2 to 2)                                     | 0.17<br>(0.12 to<br>0.21)                        | 42.02<br>(40.03 to<br>43.91)                         | 37.23<br>(35.72 to<br>38.6)                          | -0.21<br>(-0.42 to<br>-0.01)                       |
| Nicaragua      | Inherited<br>anemias        | 26<br>(23 to 29)                                  | 20<br>(18 to 23)                                  | -0.21<br>(-0.23 to<br>-0.18)                     | 659.48<br>(579.1 to<br>740.09)                       | 312.48<br>(274.91 to<br>348.66)                      | -2.28<br>(-2.45 to<br>-2.12)                       |
| Nicaragua      | Thalassemi<br>as            | 0<br>(0 to 0)                                     | 0<br>(0 to 0)                                     | 0.56<br>(-0.09 to<br>2.35)                       | 0.02<br>(0.01 to<br>0.03)                            | 0.02<br>(0.01 to<br>0.02)                            | 0.02<br>(-0.14 to<br>0.19)                         |
| Nicaragua      | Thalassemi<br>as trait      | 0<br>(0 to 1)                                     | 0<br>(0 to 1)                                     | 0.14<br>(-0.09 to<br>0.57)                       | 10.03<br>(7.17 to<br>13.56)                          | 6.82<br>(5.09 to<br>8.65)                            | -1.06<br>(-1.16 to<br>-0.95)                       |
| Nicaragua      | Sickle<br>cell<br>disorders | 0<br>(0 to 0)                                     | 0<br>(0 to 0)                                     | -0.05<br>(-0.16 to<br>0.06)                      | 0.12<br>(0.06 to<br>0.19)                            | 0.07<br>(0.03 to<br>0.11)                            | -1.71<br>(-1.92 to<br>-1.5)                        |
| Nicaragua      | Sickle<br>cell trait        | 0<br>(0 to 0)                                     | 0<br>(0 to 0)                                     | -0.17<br>(-0.49 to<br>-0.09)                     | 4.26<br>(1.69 to<br>7.17)                            | 2.12<br>(0.9 to<br>3.41)                             | -1.92<br>(-2.16 to<br>-1.67)                       |
| Nicaragua      | G6PD<br>deficiency          | 5<br>(4 to 6)                                     | 3<br>(3 to 4)                                     | -0.32<br>(-0.35 to<br>-0.28)                     | 132.08<br>(101.62 to<br>166.28)                      | 53.75<br>(41.28 to<br>66.53)                         | -2.77<br>(-3.01 to<br>-2.52)                       |
| Nicaragua      | G6PD trait                  | 20<br>(18 to 22)                                  | 16<br>(15 to 18)                                  | -0.18<br>(-0.21 to<br>-0.16)                     | 512.97<br>(461.36 to<br>559.22)                      | 249.71<br>(224.4 to<br>272.55)                       | -2.2<br>(-2.36 to<br>-2.04)                        |
| Niger          | Inherited<br>anemias        | 195<br>(180 to<br>212)                            | 494<br>(453 to<br>536)                            | 1.53<br>(1.47 to<br>1.59)                        | 2436.43<br>(2245.05 to<br>2644.02)                   | 2119.65<br>(1945.98 to<br>2302.29)                   | -0.66<br>(-0.76 to<br>-0.56)                       |
| Niger          | Thalassemi<br>as            | 0<br>(0 to 0)                                     | 0<br>(0 to 0)                                     | 1.87<br>(1.59 to<br>2.19)                        | 1.32<br>(1 to 1.75)                                  | 1.31<br>(1.01 to<br>1.68)                            | -0.21<br>(-0.29 to<br>-0.12)                       |
| Niger          | Thalassemi<br>as trait      | 15<br>(13 to 17)                                  | 41<br>(36 to 46)                                  | 1.76<br>(1.63 to<br>1.89)                        | 184.91<br>(162.39 to<br>211.8)                       | 175.51<br>(154.79 to<br>199.03)                      | -0.36<br>(-0.45 to<br>-0.26)                       |
| Niger          | Sickle<br>cell<br>disorders | 7<br>(6 to 8)                                     | 13<br>(11 to 16)                                  | 0.94<br>(0.73 to<br>1.14)                        | 85.4<br>(71.8 to<br>100.28)                          | 56.92<br>(46.71 to<br>68.78)                         | -1.88<br>(-2.11 to<br>-1.64)                       |
| Niger          | Sickle<br>cell trait        | 71<br>(65 to 79)                                  | 178<br>(161 to<br>200)                            | 1.5<br>(1.36 to<br>1.65)                         | 886.22<br>(807.06 to<br>979.78)                      | 762.55<br>(689.58 to<br>859.85)                      | -0.71<br>(-0.81 to<br>-0.61)                       |

| <b>Regions</b> | <b>Causes</b>                | <b>Cases in<br/>1990<br/>No.×103<br/>(95% UI)</b> | <b>Cases in<br/>2019<br/>No.×103<br/>(95% UI)</b> | <b>Change in<br/>absolute<br/>number<br/>(%)</b> | <b>Rates in<br/>1990 per<br/>100000<br/>(95% UI)</b> | <b>Rates in<br/>2019 per<br/>100000<br/>(95% UI)</b> | <b>EAPC<br/>from 1990<br/>and 2019<br/>(95%CI)</b> |
|----------------|------------------------------|---------------------------------------------------|---------------------------------------------------|--------------------------------------------------|------------------------------------------------------|------------------------------------------------------|----------------------------------------------------|
| <b>Niger</b>   | G6PD<br>deficiency           | 33<br>(25 to 42)                                  | 82<br>(63 to 104)                                 | 1.48<br>(1.47 to<br>1.5)                         | 411.83<br>(317.54 to<br>520.67)                      | 352.2<br>(272.47 to<br>445.31)                       | -0.64<br>(-0.75 to<br>-0.54)                       |
| <b>Niger</b>   | G6PD trait                   | 70<br>(63 to 76)                                  | 180<br>(163 to<br>195)                            | 1.58<br>(1.56 to<br>1.61)                        | 866.75<br>(785.2 to<br>942.01)                       | 771.17<br>(698.11 to<br>836.5)                       | -0.58<br>(-0.67 to<br>-0.48)                       |
| <b>Nigeria</b> | <b>Inherited<br/>anemias</b> | 2657<br>(2472 to<br>2863)                         | 4519<br>(4182 to<br>4891)                         | 0.7<br>(0.68 to<br>0.72)                         | 2945.58<br>(2740.66 to<br>3174.94)                   | 2103.52<br>(1946.62 to<br>2276.91)                   | -1.04<br>(-1.18 to<br>-0.91)                       |
| <b>Nigeria</b> | Thalassemi<br>as             | 0<br>(0 to 0)                                     | 0<br>(0 to 1)                                     | 2.13<br>(1.69 to<br>2.51)                        | 0.16<br>(0.11 to<br>0.23)                            | 0.22<br>(0.14 to<br>0.31)                            | 0.69<br>(0.51 to<br>0.88)                          |
| <b>Nigeria</b> | Thalassemi<br>as trait       | 50<br>(43 to 60)                                  | 107<br>(90 to 126)                                | 1.13<br>(1.04 to<br>1.22)                        | 55.92<br>(47.19 to<br>66.76)                         | 50.04<br>(42.08 to<br>58.85)                         | -0.52<br>(-0.67 to<br>-0.37)                       |
| <b>Nigeria</b> | Sickle<br>cell<br>disorders  | 128<br>(94 to 171)                                | 213<br>(153 to<br>289)                            | 0.66<br>(0.58 to<br>0.74)                        | 141.93<br>(104.68 to<br>189.61)                      | 98.98<br>(71.04 to<br>134.42)                        | -1.4<br>(-1.48 to<br>-1.31)                        |
| <b>Nigeria</b> | Sickle<br>cell trait         | 1005<br>(858 to<br>1167)                          | 1798<br>(1525 to<br>2090)                         | 0.79<br>(0.76 to<br>0.82)                        | 1114.7<br>(951.59 to<br>1293.65)                     | 836.95<br>(709.77 to<br>972.78)                      | -1.06<br>(-1.17 to<br>-0.95)                       |
| <b>Nigeria</b> | G6PD<br>deficiency           | 645<br>(618 to<br>670)                            | 1106<br>(1057 to<br>1149)                         | 0.71<br>(0.67 to<br>0.74)                        | 715.49<br>(684.99 to<br>742.83)                      | 514.72<br>(492.11 to<br>535.02)                      | -1.04<br>(-1.17 to<br>-0.9)                        |
| <b>Nigeria</b> | G6PD trait                   | 827<br>(815 to<br>838)                            | 1295<br>(1273 to<br>1314)                         | 0.56<br>(0.56 to<br>0.57)                        | 917.37<br>(903.94 to<br>928.92)                      | 602.62<br>(592.72 to<br>611.54)                      | -1.01<br>(-1.23 to<br>-0.79)                       |
| <b>Niue</b>    | <b>Inherited<br/>anemias</b> | 0<br>(0 to 0)                                     | 0<br>(0 to 0)                                     | -0.48<br>(-0.5 to<br>-0.47)                      | 485.7<br>(432.92 to<br>544.03)                       | 348.88<br>(308.53 to<br>390.86)                      | -1.18<br>(-1.43 to<br>-0.93)                       |
| <b>Niue</b>    | Thalassemi<br>as             | 0<br>(0 to 0)                                     | 0<br>(0 to 0)                                     | -0.59<br>(-0.64 to<br>-0.54)                     | 2.19<br>(1.21 to<br>3.52)                            | 1.24<br>(0.68 to<br>1.95)                            | -0.71<br>(-1.79 to<br>0.37)                        |
| <b>Niue</b>    | Thalassemi<br>as trait       | 0<br>(0 to 0)                                     | 0<br>(0 to 0)                                     | -0.55<br>(-0.58 to<br>-0.53)                     | 72.66<br>(55.82 to<br>91.15)                         | 45.14<br>(34.57 to<br>55.87)                         | -1.19<br>(-1.66 to<br>-0.71)                       |
| <b>Niue</b>    | Sickle<br>cell<br>disorders  | 0<br>(0 to 0)                                     | 0<br>(0 to 0)                                     | -0.52<br>(-0.55 to<br>-0.32)                     | 0<br>(0 to 0)                                        | 0<br>(0 to 0)                                        | -1.57<br>(-1.71 to<br>-1.42)                       |
| <b>Niue</b>    | Sickle<br>cell trait         | 0<br>(0 to 0)                                     | 0<br>(0 to 0)                                     | -0.53<br>(-0.54 to<br>-0.36)                     | 2.9<br>(1.27 to<br>4.69)                             | 1.91<br>(0.82 to<br>3.03)                            | -1.57<br>(-1.7 to<br>-1.44)                        |

| <b>Regions</b>                 | <b>Causes</b>               | <b>Cases in<br/>1990<br/>No.×103<br/>(95% UI)</b> | <b>Cases in<br/>2019<br/>No.×103<br/>(95% UI)</b> | <b>Change in<br/>absolute<br/>number<br/>(%)</b> | <b>Rates in<br/>1990 per<br/>100000<br/>(95% UI)</b> | <b>Rates in<br/>2019 per<br/>100000<br/>(95% UI)</b> | <b>EAPC<br/>from 1990<br/>and 2019<br/>(95%CI)</b> |
|--------------------------------|-----------------------------|---------------------------------------------------|---------------------------------------------------|--------------------------------------------------|------------------------------------------------------|------------------------------------------------------|----------------------------------------------------|
| Niue                           | G6PD<br>deficiency          | 0<br>(0 to 0)                                     | 0<br>(0 to 0)                                     | -0.44<br>(-0.46 to<br>-0.42)                     | 100.12<br>(77.28 to<br>125.37)                       | 78.07<br>(60.14 to<br>96.91)                         | -0.98<br>(-1.27 to<br>-0.69)                       |
| Niue                           | G6PD trait                  | 0<br>(0 to 0)                                     | 0<br>(0 to 0)                                     | -0.48<br>(-0.5 to<br>-0.47)                      | 307.83<br>(276.98 to<br>338.44)                      | 222.51<br>(200.82 to<br>242.59)                      | -1.26<br>(-1.48 to<br>-1.04)                       |
| North<br>Macedonia             | Inherited<br>anemias        | 5<br>(5 to 6)                                     | 3<br>(3 to 4)                                     | -0.35<br>(-0.36 to<br>-0.34)                     | 258.91<br>(229.08 to<br>292.3)                       | 158.01<br>(140.18 to<br>178.42)                      | -1.84<br>(-2.07 to<br>-1.61)                       |
| North<br>Macedonia             | Thalassemi<br>as            | 0<br>(0 to 0)                                     | 0<br>(0 to 0)                                     | -0.61<br>(-0.66 to<br>-0.55)                     | 1.58<br>(1.02 to<br>2.57)                            | 0.58<br>(0.39 to<br>0.89)                            | -3.31<br>(-3.57 to<br>-3.05)                       |
| North<br>Macedonia             | Thalassemi<br>as trait      | 1<br>(1 to 1)                                     | 0<br>(0 to 1)                                     | -0.34<br>(-0.38 to<br>-0.29)                     | 34.45<br>(28.96 to<br>41.88)                         | 21.35<br>(17.88 to<br>25.54)                         | -1.61<br>(-1.88 to<br>-1.33)                       |
| North<br>Macedonia             | Sickle<br>cell<br>disorders | 0<br>(0 to 0)                                     | 0<br>(0 to 0)                                     | -0.29<br>(-0.36 to<br>-0.21)                     | 0.18<br>(0.13 to<br>0.23)                            | 0.12<br>(0.09 to<br>0.16)                            | -1.51<br>(-1.75 to<br>-1.26)                       |
| North<br>Macedonia             | Sickle<br>cell trait        | 1<br>(1 to 1)                                     | 0<br>(0 to 1)                                     | -0.33<br>(-0.36 to<br>-0.3)                      | 33.18<br>(28.67 to<br>38.32)                         | 20.79<br>(17.91 to<br>24.01)                         | -1.61<br>(-1.85 to<br>-1.36)                       |
| North<br>Macedonia             | G6PD<br>deficiency          | 1<br>(1 to 2)                                     | 1<br>(1 to 1)                                     | -0.32<br>(-0.32 to<br>-0.31)                     | 62.94<br>(48.69 to<br>78.79)                         | 40.27<br>(31.22 to<br>50.43)                         | -2.41<br>(-2.73 to<br>-2.09)                       |
| North<br>Macedonia             | G6PD trait                  | 3<br>(2 to 3)                                     | 2<br>(1 to 2)                                     | -0.37<br>(-0.38 to<br>-0.35)                     | 126.58<br>(112 to<br>142.07)                         | 74.91<br>(66.28 to<br>84.09)                         | -1.7<br>(-1.96 to<br>-1.45)                        |
| Northern<br>Mariana<br>Islands | Inherited<br>anemias        | 0<br>(0 to 0)                                     | 0<br>(0 to 0)                                     | -0.56<br>(-0.56 to<br>-0.55)                     | 580.54<br>(515.32 to<br>649.09)                      | 274.48<br>(243.52 to<br>306.72)                      | -3.44<br>(-4.02 to<br>-2.84)                       |
| Northern<br>Mariana<br>Islands | Thalassemi<br>as            | 0<br>(0 to 0)                                     | 0<br>(0 to 0)                                     | -0.65<br>(-0.7 to<br>-0.61)                      | 2.44<br>(1.29 to<br>3.86)                            | 0.91<br>(0.48 to<br>1.43)                            | -3.05<br>(-3.89 to<br>-2.21)                       |
| Northern<br>Mariana<br>Islands | Thalassemi<br>as trait      | 0<br>(0 to 0)                                     | 0<br>(0 to 0)                                     | -0.62<br>(-0.64 to<br>-0.6)                      | 83.75<br>(63.64 to<br>104.08)                        | 34.32<br>(25.88 to<br>42.58)                         | -3.47<br>(-4.02 to<br>-2.9)                        |
| Northern<br>Mariana<br>Islands | Sickle<br>cell<br>disorders | 0<br>(0 to 0)                                     | 0<br>(0 to 0)                                     | -0.6<br>(-0.61 to<br>-0.5)                       | 0<br>(0 to 0)                                        | 0<br>(0 to 0)                                        | -3.81<br>(-4.44 to<br>-3.17)                       |
| Northern<br>Mariana<br>Islands | Sickle<br>cell trait        | 0<br>(0 to 0)                                     | 0<br>(0 to 0)                                     | -0.6<br>(-0.61 to<br>-0.54)                      | 3.41<br>(1.49 to<br>5.48)                            | 1.47<br>(0.64 to<br>2.39)                            | -3.83<br>(-4.47 to<br>-3.19)                       |

| <b>Regions</b>                 | <b>Causes</b>               | <b>Cases in<br/>1990<br/>No.×103<br/>(95% UI)</b> | <b>Cases in<br/>2019<br/>No.×103<br/>(95% UI)</b> | <b>Change in<br/>absolute<br/>number<br/>(%)</b> | <b>Rates in<br/>1990 per<br/>100000<br/>(95% UI)</b> | <b>Rates in<br/>2019 per<br/>100000<br/>(95% UI)</b> | <b>EAPC<br/>from 1990<br/>and 2019<br/>(95%CI)</b> |
|--------------------------------|-----------------------------|---------------------------------------------------|---------------------------------------------------|--------------------------------------------------|------------------------------------------------------|------------------------------------------------------|----------------------------------------------------|
| Northern<br>Mariana<br>Islands | G6PD<br>deficiency          | 0<br>(0 to 0)                                     | 0<br>(0 to 0)                                     | -0.52<br>(-0.54 to<br>-0.5)                      | 121.98<br>(93.91 to<br>151.59)                       | 62.25<br>(47.86 to<br>77.75)                         | -3.26<br>(-3.87 to<br>-2.64)                       |
| Northern<br>Mariana<br>Islands | G6PD trait                  | 0<br>(0 to 0)                                     | 0<br>(0 to 0)                                     | -0.55<br>(-0.56 to<br>-0.55)                     | 368.96<br>(331.93 to<br>405.48)                      | 175.53<br>(158.47 to<br>191.09)                      | -3.5<br>(-4.12 to<br>-2.88)                        |
| Norway                         | Inherited<br>anemias        | 11<br>(11 to 12)                                  | 11<br>(11 to 11)                                  | -0.04<br>(-0.06 to<br>-0.02)                     | 269.51<br>(258.95 to<br>281.55)                      | 206.11<br>(197.93 to<br>214.91)                      | -0.89<br>(-1.03 to<br>-0.76)                       |
| Norway                         | Thalassemi<br>as            | 0<br>(0 to 0)                                     | 0<br>(0 to 0)                                     | -0.12<br>(-0.17 to<br>-0.04)                     | 0.65<br>(0.47 to<br>0.89)                            | 0.46<br>(0.34 to<br>0.6)                             | -1.45<br>(-1.7 to<br>-1.2)                         |
| Norway                         | Thalassemi<br>as trait      | 2<br>(2 to 2)                                     | 2<br>(2 to 2)                                     | -0.08<br>(-0.11 to<br>-0.04)                     | 47.61<br>(40.96 to<br>55.2)                          | 34.87<br>(30.25 to<br>39.8)                          | -1.15<br>(-1.26 to<br>-1.03)                       |
| Norway                         | Sickle<br>cell<br>disorders | 0<br>(0 to 0)                                     | 0<br>(0 to 0)                                     | 0.93<br>(0.4 to<br>1.45)                         | 0.14<br>(0.09 to<br>0.22)                            | 0.22<br>(0.13 to<br>0.34)                            | 1.59<br>(0.62 to<br>2.56)                          |
| Norway                         | Sickle<br>cell trait        | 1<br>(1 to 1)                                     | 1<br>(1 to 2)                                     | 0.37<br>(0.16 to<br>0.55)                        | 22.79<br>(17.13 to<br>29.63)                         | 24.75<br>(19.25 to<br>31.37)                         | 0.35<br>(-0.16 to<br>0.86)                         |
| Norway                         | G6PD<br>deficiency          | 2<br>(2 to 2)                                     | 2<br>(1 to 2)                                     | -0.03<br>(-0.04 to<br>-0.02)                     | 37.49<br>(35.73 to<br>39.01)                         | 28.97<br>(27.69 to<br>30.16)                         | -0.88<br>(-0.97 to<br>-0.79)                       |
| Norway                         | G6PD trait                  | 7<br>(7 to 7)                                     | 6<br>(6 to 6)                                     | -0.08<br>(-0.09 to<br>-0.08)                     | 160.83<br>(157.65 to<br>163.82)                      | 116.86<br>(114.53 to<br>118.97)                      | -1.04<br>(-1.17 to<br>-0.92)                       |
| Oman                           | Inherited<br>anemias        | 37<br>(35 to 38)                                  | 42<br>(38 to 46)                                  | 0.14<br>(0.04 to<br>0.25)                        | 1887.85<br>(1822.21 to<br>1955.85)                   | 915.61<br>(829.49 to<br>1007.03)                     | -2.23<br>(-2.42 to<br>-2.03)                       |
| Oman                           | Thalassemi<br>as            | 0<br>(0 to 0)                                     | 0<br>(0 to 0)                                     | 0.32<br>(0.17 to<br>0.51)                        | 0.83<br>(0.6 to<br>1.17)                             | 0.46<br>(0.34 to<br>0.62)                            | -1.74<br>(-1.96 to<br>-1.53)                       |
| Oman                           | Thalassemi<br>as trait      | 2<br>(2 to 3)                                     | 3<br>(2 to 3)                                     | 0.26<br>(0.19 to<br>0.33)                        | 115.19<br>(98.62 to<br>135.36)                       | 61.41<br>(52.82 to<br>71.15)                         | -1.89<br>(-2.11 to<br>-1.67)                       |
| Oman                           | Sickle<br>cell<br>disorders | 0<br>(0 to 0)                                     | 0<br>(0 to 0)                                     | 0.22<br>(0.11 to<br>0.33)                        | 17.63<br>(14.99 to<br>20.39)                         | 9.09<br>(7.57 to<br>10.88)                           | -1.96<br>(-2.17 to<br>-1.75)                       |
| Oman                           | Sickle<br>cell trait        | 9<br>(8 to 9)                                     | 11<br>(10 to 11)                                  | 0.19<br>(0.14 to<br>0.24)                        | 454.47<br>(421.83 to<br>486.44)                      | 229.75<br>(211.35 to<br>249.81)                      | -2.04<br>(-2.25 to<br>-1.82)                       |

| <b>Regions</b>  | <b>Causes</b>                | <b>Cases in<br/>1990<br/>No.×103<br/>(95% UI)</b> | <b>Cases in<br/>2019<br/>No.×103<br/>(95% UI)</b> | <b>Change in<br/>absolute<br/>number<br/>(%)</b> | <b>Rates in<br/>1990 per<br/>100000<br/>(95% UI)</b> | <b>Rates in<br/>2019 per<br/>100000<br/>(95% UI)</b> | <b>EAPC<br/>from 1990<br/>and 2019<br/>(95%CI)</b> |
|-----------------|------------------------------|---------------------------------------------------|---------------------------------------------------|--------------------------------------------------|------------------------------------------------------|------------------------------------------------------|----------------------------------------------------|
| <b>Oman</b>     | G6PD<br>deficiency           | 11<br>(10 to 12)                                  | 12<br>(9 to 15)                                   | 0.04<br>(−0.19 to<br>0.27)                       | 575.73<br>(537.56 to<br>613.56)                      | 252.82<br>(195.44 to<br>317.05)                      | −2.67<br>(−2.82 to<br>−2.52)                       |
| <b>Oman</b>     | G6PD trait                   | 14<br>(14 to 14)                                  | 17<br>(15 to 18)                                  | 0.18<br>(0.1 to<br>0.25)                         | 724<br>(704.27 to<br>741.71)                         | 362.08<br>(337.81 to<br>384.01)                      | −2.08<br>(−2.3 to<br>−1.85)                        |
| <b>Pakistan</b> | <b>Inherited<br/>anemias</b> | 815<br>(751 to<br>893)                            | 1147<br>(1059 to<br>1257)                         | 0.41<br>(0.38 to<br>0.43)                        | 722.34<br>(665.95 to<br>791.59)                      | 512<br>(472.63 to<br>561.06)                         | −1.33<br>(−1.46 to<br>−1.2)                        |
| <b>Pakistan</b> | Thalassemi<br>as             | 5<br>(4 to 8)                                     | 7<br>(5 to 11)                                    | 0.37<br>(0.25 to<br>0.47)                        | 4.83<br>(3.17 to<br>7.41)                            | 3.32<br>(2.17 to<br>5.08)                            | −1.4<br>(−1.54 to<br>−1.25)                        |
| <b>Pakistan</b> | Thalassemi<br>as trait       | 336<br>(278 to<br>411)                            | 460<br>(380 to<br>563)                            | 0.37<br>(0.32 to<br>0.42)                        | 297.57<br>(246.73 to<br>364.2)                       | 205.09<br>(169.61 to<br>251.3)                       | −1.39<br>(−1.54 to<br>−1.24)                       |
| <b>Pakistan</b> | Sickle<br>cell<br>disorders  | 0<br>(0 to 0)                                     | 0<br>(0 to 0)                                     | 0.36<br>(0.24 to<br>0.56)                        | 0.03<br>(0.02 to<br>0.04)                            | 0.02<br>(0.01 to<br>0.03)                            | −1.42<br>(−1.6 to<br>−1.24)                        |
| <b>Pakistan</b> | Sickle<br>cell trait         | 21<br>(17 to 25)                                  | 28<br>(23 to 34)                                  | 0.36<br>(0.3 to<br>0.49)                         | 18.41<br>(15.09 to<br>22.31)                         | 12.65<br>(10.38 to<br>15.24)                         | −1.4<br>(−1.57 to<br>−1.23)                        |
| <b>Pakistan</b> | G6PD<br>deficiency           | 147<br>(140 to<br>154)                            | 214<br>(205 to<br>224)                            | 0.46<br>(0.43 to<br>0.49)                        | 129.92<br>(123.98 to<br>136.11)                      | 95.53<br>(91.29 to<br>99.86)                         | −1.52<br>(−1.79 to<br>−1.26)                       |
| <b>Pakistan</b> | G6PD trait                   | 306<br>(297 to<br>315)                            | 438<br>(423 to<br>455)                            | 0.43<br>(0.41 to<br>0.46)                        | 271.58<br>(263.59 to<br>279.24)                      | 195.39<br>(188.74 to<br>202.9)                       | −1.17<br>(−1.41 to<br>−0.94)                       |
| <b>Palau</b>    | <b>Inherited<br/>anemias</b> | 0<br>(0 to 0)                                     | 0<br>(0 to 0)                                     | −0.43<br>(−0.45 to<br>−0.41)                     | 506.62<br>(452.17 to<br>565.89)                      | 246.48<br>(218.51 to<br>274.43)                      | −2.35<br>(−2.57 to<br>−2.12)                       |
| <b>Palau</b>    | Thalassemi<br>as             | 0<br>(0 to 0)                                     | 0<br>(0 to 0)                                     | −0.54<br>(−0.6 to<br>−0.48)                      | 2.2<br>(1.22 to<br>3.39)                             | 0.86<br>(0.47 to<br>1.32)                            | −1.9<br>(−3.03 to<br>−0.75)                        |
| <b>Palau</b>    | Thalassemi<br>as trait       | 0<br>(0 to 0)                                     | 0<br>(0 to 0)                                     | −0.5<br>(−0.53 to<br>−0.47)                      | 73.89<br>(56.95 to<br>90.97)                         | 31.3<br>(24.06 to<br>38.21)                          | −2.35<br>(−2.89 to<br>−1.81)                       |
| <b>Palau</b>    | Sickle<br>cell<br>disorders  | 0<br>(0 to 0)                                     | 0<br>(0 to 0)                                     | −0.49<br>(−0.51 to<br>−0.42)                     | 0<br>(0 to 0)                                        | 0<br>(0 to 0)                                        | −2.73<br>(−2.94 to<br>−2.51)                       |
| <b>Palau</b>    | Sickle<br>cell trait         | 0<br>(0 to 0)                                     | 0<br>(0 to 0)                                     | −0.49<br>(−0.49 to<br>−0.44)                     | 2.98<br>(1.3 to<br>4.85)                             | 1.3<br>(0.57 to<br>2.11)                             | −2.76<br>(−2.98 to<br>−2.55)                       |

| <b>Regions</b> | <b>Causes</b>               | <b>Cases in<br/>1990<br/>No.×103<br/>(95% UI)</b> | <b>Cases in<br/>2019<br/>No.×103<br/>(95% UI)</b> | <b>Change in<br/>absolute<br/>number<br/>(%)</b> | <b>Rates in<br/>1990 per<br/>100000<br/>(95% UI)</b> | <b>Rates in<br/>2019 per<br/>100000<br/>(95% UI)</b> | <b>EAPC<br/>from 1990<br/>and 2019<br/>(95%CI)</b> |
|----------------|-----------------------------|---------------------------------------------------|---------------------------------------------------|--------------------------------------------------|------------------------------------------------------|------------------------------------------------------|----------------------------------------------------|
| Palau          | G6PD<br>deficiency          | 0<br>(0 to 0)                                     | 0<br>(0 to 0)                                     | -0.38<br>(-0.43 to<br>-0.34)                     | 106.66<br>(82.71 to<br>132.67)                       | 56.32<br>(43.62 to<br>69.97)                         | -2.15<br>(-2.34 to<br>-1.95)                       |
| Palau          | G6PD trait                  | 0<br>(0 to 0)                                     | 0<br>(0 to 0)                                     | -0.43<br>(-0.45 to<br>-0.41)                     | 320.89<br>(289.18 to<br>351.54)                      | 156.69<br>(141.9 to<br>170.1)                        | -2.43<br>(-2.59 to<br>-2.26)                       |
| Palestine      | Inherited<br>anemias        | 32<br>(29 to 35)                                  | 43<br>(39 to 46)                                  | 0.33<br>(0.31 to<br>0.36)                        | 1545.18<br>(1403.63 to<br>1689.88)                   | 859.69<br>(782.61 to<br>937.47)                      | -2.09<br>(-2.26 to<br>-1.93)                       |
| Palestine      | Thalassemi<br>as            | 0<br>(0 to 0)                                     | 0<br>(0 to 0)                                     | 0.4<br>(0.22 to<br>0.58)                         | 3.18<br>(2.09 to<br>4.82)                            | 1.85<br>(1.25 to<br>2.76)                            | -1.91<br>(-2.07 to<br>-1.75)                       |
| Palestine      | Thalassemi<br>as trait      | 5<br>(4 to 6)                                     | 7<br>(6 to 9)                                     | 0.38<br>(0.29 to<br>0.46)                        | 253<br>(209.84 to<br>306.53)                         | 145.39<br>(121.06 to<br>174.99)                      | -1.95<br>(-2.12 to<br>-1.78)                       |
| Palestine      | Sickle<br>cell<br>disorders | 0<br>(0 to 0)                                     | 0<br>(0 to 0)                                     | 0.4<br>(0.29 to<br>0.51)                         | 4.82<br>(3.67 to<br>6.11)                            | 2.81<br>(2.14 to<br>3.6)                             | -2.42<br>(-2.66 to<br>-2.18)                       |
| Palestine      | Sickle<br>cell trait        | 6<br>(5 to 7)                                     | 8<br>(7 to 9)                                     | 0.35<br>(0.3 to<br>0.4)                          | 287.33<br>(252.16 to<br>323.31)                      | 161.89<br>(142.13 to<br>183.01)                      | -2.26<br>(-2.44 to<br>-2.07)                       |
| Palestine      | G6PD<br>deficiency          | 5<br>(4 to 7)                                     | 7<br>(5 to 9)                                     | 0.31<br>(0.24 to<br>0.38)                        | 260.43<br>(201.06 to<br>324.38)                      | 142.51<br>(110.16 to<br>179.19)                      | -2.08<br>(-2.24 to<br>-1.91)                       |
| Palestine      | G6PD trait                  | 15<br>(14 to 17)                                  | 20<br>(18 to 22)                                  | 0.32<br>(0.31 to<br>0.33)                        | 736.42<br>(667.84 to<br>799.48)                      | 405.24<br>(367.49 to<br>439.01)                      | -2.08<br>(-2.24 to<br>-1.92)                       |
| Panama         | Inherited<br>anemias        | 11<br>(9 to 12)                                   | 12<br>(10 to 13)                                  | 0.13<br>(0.1 to<br>0.15)                         | 441.15<br>(386.84 to<br>494.72)                      | 285.61<br>(251.68 to<br>321.87)                      | -1.4<br>(-1.53 to<br>-1.28)                        |
| Panama         | Thalassemi<br>as            | 0<br>(0 to 0)                                     | 0<br>(0 to 0)                                     | 1.22<br>(0.29 to<br>3.74)                        | 0.01<br>(0.01 to<br>0.02)                            | 0.01<br>(0.01 to<br>0.02)                            | 0.84<br>(0.61 to<br>1.06)                          |
| Panama         | Thalassemi<br>as trait      | 0<br>(0 to 0)                                     | 0<br>(0 to 0)                                     | 0.62<br>(0.29 to<br>1.22)                        | 6.53<br>(4.65 to<br>8.79)                            | 6.06<br>(4.47 to<br>7.8)                             | -0.21<br>(-0.3 to<br>-0.12)                        |
| Panama         | Sickle<br>cell<br>disorders | 0<br>(0 to 0)                                     | 0<br>(0 to 0)                                     | 0.31<br>(0.14 to<br>0.54)                        | 0.06<br>(0.03 to<br>0.11)                            | 0.05<br>(0.03 to<br>0.08)                            | -0.95<br>(-1.06 to<br>-0.84)                       |
| Panama         | Sickle<br>cell trait        | 0<br>(0 to 0)                                     | 0<br>(0 to 0)                                     | 0.22<br>(-0.23 to<br>0.29)                       | 2.68<br>(1.1 to<br>4.23)                             | 1.87<br>(0.82 to<br>3.04)                            | -1.05<br>(-1.17 to<br>-0.94)                       |

| <b>Regions</b>      | <b>Causes</b>               | <b>Cases in<br/>1990<br/>No.×103<br/>(95% UI)</b> | <b>Cases in<br/>2019<br/>No.×103<br/>(95% UI)</b> | <b>Change in<br/>absolute<br/>number<br/>(%)</b> | <b>Rates in<br/>1990 per<br/>100000<br/>(95% UI)</b> | <b>Rates in<br/>2019 per<br/>100000<br/>(95% UI)</b> | <b>EAPC<br/>from 1990<br/>and 2019<br/>(95%CI)</b> |
|---------------------|-----------------------------|---------------------------------------------------|---------------------------------------------------|--------------------------------------------------|------------------------------------------------------|------------------------------------------------------|----------------------------------------------------|
| Panama              | G6PD<br>deficiency          | 2<br>(2 to 3)                                     | 2<br>(2 to 3)                                     | -0.03<br>(-0.07 to<br>0.02)                      | 89.53<br>(69.2 to<br>112.95)                         | 49.77<br>(38.26 to<br>62.55)                         | -1.89<br>(-2.14 to<br>-1.64)                       |
| Panama              | G6PD trait                  | 8<br>(7 to 9)                                     | 9<br>(9 to 10)                                    | 0.16<br>(0.13 to<br>0.19)                        | 342.33<br>(308.21 to<br>373.07)                      | 227.84<br>(204.76 to<br>251.56)                      | -1.32<br>(-1.42 to<br>-1.21)                       |
| Papua New<br>Guinea | Inherited<br>anemias        | 40<br>(37 to 43)                                  | 95<br>(86 to 105)                                 | 1.37<br>(1.27 to<br>1.49)                        | 984.1<br>(909.67 to<br>1060.2)                       | 967.75<br>(869.59 to<br>1068.84)                     | -0.18<br>(-0.34 to<br>-0.01)                       |
| Papua New<br>Guinea | Thalassemi<br>as            | 0<br>(0 to 0)                                     | 1<br>(0 to 1)                                     | 1.06<br>(0.87 to<br>1.27)                        | 7.44<br>(4.99 to<br>10.24)                           | 6.35<br>(4.31 to<br>8.9)                             | 0.35<br>(-0.37 to<br>1.08)                         |
| Papua New<br>Guinea | Thalassemi<br>as trait      | 12<br>(11 to 14)                                  | 27<br>(23 to 31)                                  | 1.18<br>(1.1 to<br>1.27)                         | 302.19<br>(261.47 to<br>344.91)                      | 273.17<br>(235.45 to<br>313.31)                      | -0.11<br>(-0.31 to<br>0.09)                        |
| Papua New<br>Guinea | Sickle<br>cell<br>disorders | 0<br>(0 to 0)                                     | 0<br>(0 to 0)                                     | 1.32<br>(1.21 to<br>2.4)                         | 0<br>(0 to 0.01)                                     | 0<br>(0 to 0.01)                                     | -0.06<br>(-0.16 to<br>0.05)                        |
| Papua New<br>Guinea | Sickle<br>cell trait        | 0<br>(0 to 0)                                     | 0<br>(0 to 1)                                     | 1.28<br>(1.21 to<br>2.17)                        | 5.27<br>(2.28 to<br>8.76)                            | 4.99<br>(2.09 to<br>8.64)                            | -0.14<br>(-0.22 to<br>-0.06)                       |
| Papua New<br>Guinea | G6PD<br>deficiency          | 10<br>(9 to 11)                                   | 18<br>(14 to 23)                                  | 0.85<br>(0.48 to<br>1.23)                        | 242.23<br>(224.09 to<br>260.24)                      | 185.22<br>(143.19 to<br>231.7)                       | -0.94<br>(-1.19 to<br>-0.68)                       |
| Papua New<br>Guinea | G6PD trait                  | 17<br>(16 to 19)                                  | 49<br>(44 to 54)                                  | 1.82<br>(1.74 to<br>1.91)                        | 426.95<br>(382.22 to<br>472.04)                      | 498.01<br>(450.43 to<br>545.96)                      | 0.08<br>(-0.18 to<br>0.33)                         |
| Paraguay            | Inherited<br>anemias        | 23<br>(20 to 25)                                  | 23<br>(20 to 25)                                  | 0<br>(-0.02 to<br>0.04)                          | 558.38<br>(497.58 to<br>621.15)                      | 327.34<br>(292.2 to<br>364.94)                       | -1.71<br>(-1.81 to<br>-1.62)                       |
| Paraguay            | Thalassemi<br>as            | 0<br>(0 to 0)                                     | 0<br>(0 to 0)                                     | 0.36<br>(-0.07 to<br>1.08)                       | 0.03<br>(0.02 to<br>0.04)                            | 0.02<br>(0.01 to<br>0.03)                            | -0.68<br>(-0.79 to<br>-0.57)                       |
| Paraguay            | Thalassemi<br>as trait      | 1<br>(1 to 1)                                     | 1<br>(1 to 1)                                     | 0.1<br>(-0.06 to<br>0.29)                        | 18.11<br>(15.42 to<br>21.31)                         | 11.6<br>(9.8 to<br>13.44)                            | -1.38<br>(-1.43 to<br>-1.32)                       |
| Paraguay            | Sickle<br>cell<br>disorders | 0<br>(0 to 0)                                     | 0<br>(0 to 0)                                     | 0.05<br>(-0.04 to<br>0.15)                       | 0.6<br>(0.47 to<br>0.76)                             | 0.37<br>(0.28 to<br>0.47)                            | -2<br>(-2.21 to<br>-1.79)                          |
| Paraguay            | Sickle<br>cell trait        | 3<br>(3 to 4)                                     | 3<br>(3 to 4)                                     | 0.02<br>(-0.03 to<br>0.08)                       | 75.78<br>(65.55 to<br>87.73)                         | 45.28<br>(38.89 to<br>52.38)                         | -1.9<br>(-2.04 to<br>-1.75)                        |

| <b>Regions</b> | <b>Causes</b>               | <b>Cases in<br/>1990<br/>No.×103<br/>(95% UI)</b> | <b>Cases in<br/>2019<br/>No.×103<br/>(95% UI)</b> | <b>Change in<br/>absolute<br/>number<br/>(%)</b> | <b>Rates in<br/>1990 per<br/>100000<br/>(95% UI)</b> | <b>Rates in<br/>2019 per<br/>100000<br/>(95% UI)</b> | <b>EAPC<br/>from 1990<br/>and 2019<br/>(95%CI)</b> |
|----------------|-----------------------------|---------------------------------------------------|---------------------------------------------------|--------------------------------------------------|------------------------------------------------------|------------------------------------------------------|----------------------------------------------------|
| Paraguay       | G6PD<br>deficiency          | 4<br>(3 to 5)                                     | 4<br>(3 to 5)                                     | -0.01<br>(-0.04 to<br>0.03)                      | 95.03<br>(72.85 to<br>119.42)                        | 55.14<br>(42.41 to<br>69.12)                         | -1.69<br>(-1.79 to<br>-1.6)                        |
| Paraguay       | G6PD trait                  | 15<br>(13 to 16)                                  | 15<br>(13 to 16)                                  | 0<br>(-0.03 to<br>0.03)                          | 368.83<br>(329.86 to<br>407.56)                      | 214.93<br>(192.94 to<br>237.63)                      | -1.7<br>(-1.79 to<br>-1.6)                         |
| Peru           | Inherited<br>anemias        | 103<br>(93 to 114)                                | 113<br>(99 to 127)                                | 0.09<br>(0.05 to<br>0.13)                        | 475.11<br>(426.74 to<br>525.42)                      | 331.3<br>(292.57 to<br>373.64)                       | -1.54<br>(-1.64 to<br>-1.44)                       |
| Peru           | Thalassemi<br>as            | 0<br>(0 to 0)                                     | 0<br>(0 to 0)                                     | 0.35<br>(-0.04 to<br>1.1)                        | 0.03<br>(0.02 to<br>0.04)                            | 0.02<br>(0.02 to<br>0.03)                            | -0.45<br>(-0.59 to<br>-0.3)                        |
| Peru           | Thalassemi<br>as trait      | 4<br>(3 to 5)                                     | 4<br>(4 to 5)                                     | 0.07<br>(-0.07 to<br>0.24)                       | 19.02<br>(16.01 to<br>22.4)                          | 13<br>(10.87 to<br>15.19)                            | -1.25<br>(-1.29 to<br>-1.21)                       |
| Peru           | Sickle<br>cell<br>disorders | 0<br>(0 to 0)                                     | 0<br>(0 to 0)                                     | -0.02<br>(-0.12 to<br>0.07)                      | 0.16<br>(0.11 to<br>0.22)                            | 0.1<br>(0.07 to<br>0.14)                             | -1.41<br>(-1.48 to<br>-1.34)                       |
| Peru           | Sickle<br>cell trait        | 9<br>(8 to 11)                                    | 9<br>(7 to 11)                                    | -0.03<br>(-0.08 to<br>0.01)                      | 42.58<br>(35.35 to<br>50.91)                         | 26.44<br>(21.85 to<br>31.64)                         | -1.51<br>(-1.55 to<br>-1.47)                       |
| Peru           | G6PD<br>deficiency          | 10<br>(8 to 13)                                   | 25<br>(19 to 31)                                  | 1.4<br>(1.23 to<br>1.55)                         | 48.03<br>(37.48 to<br>60.01)                         | 73.57<br>(57.18 to<br>92.44)                         | -0.85<br>(-1.54 to<br>-0.16)                       |
| Peru           | G6PD trait                  | 79<br>(71 to 88)                                  | 74<br>(66 to 82)                                  | -0.07<br>(-0.1 to<br>-0.02)                      | 365.29<br>(327.83 to<br>404.83)                      | 218.17<br>(194.98 to<br>241.3)                       | -1.7<br>(-1.73 to<br>-1.67)                        |
| Philippines    | Inherited<br>anemias        | 400<br>(377 to<br>430)                            | 485<br>(455 to<br>526)                            | 0.21<br>(0.2 to<br>0.23)                         | 631.29<br>(595.33 to<br>679.73)                      | 432.76<br>(406.12 to<br>468.75)                      | -1.14<br>(-1.24 to<br>-1.04)                       |
| Philippines    | Thalassemi<br>as            | 2<br>(2 to 4)                                     | 4<br>(3 to 5)                                     | 0.44<br>(0.39 to<br>0.49)                        | 3.92<br>(2.79 to<br>5.58)                            | 3.18<br>(2.27 to<br>4.51)                            | -0.5<br>(-0.64 to<br>-0.37)                        |
| Philippines    | Thalassemi<br>as trait      | 135<br>(114 to<br>163)                            | 182<br>(154 to<br>219)                            | 0.35<br>(0.33 to<br>0.37)                        | 213.21<br>(179.59 to<br>256.83)                      | 162.43<br>(137.09 to<br>195.4)                       | -0.82<br>(-0.89 to<br>-0.75)                       |
| Philippines    | Sickle<br>cell<br>disorders | 0<br>(0 to 0)                                     | 0<br>(0 to 0)                                     | 0.22<br>(0.06 to<br>0.33)                        | 0.03<br>(0.02 to<br>0.04)                            | 0.02<br>(0.01 to<br>0.03)                            | -1.3<br>(-1.38 to<br>-1.23)                        |
| Philippines    | Sickle<br>cell trait        | 11<br>(10 to 14)                                  | 14<br>(12 to 17)                                  | 0.25<br>(0.17 to<br>0.31)                        | 18.14<br>(15.29 to<br>21.44)                         | 12.79<br>(10.91 to<br>15.01)                         | -1.19<br>(-1.23 to<br>-1.15)                       |



| Regions     | Causes                | Cases in 1990<br>No.×103<br>(95% UI) | Cases in 2019<br>No.×103<br>(95% UI) | Change in absolute number<br>(%) | Rates in 1990 per 100000<br>(95% UI) | Rates in 2019 per 100000<br>(95% UI) | EAPC from 1990 and 2019<br>(95%CI) |
|-------------|-----------------------|--------------------------------------|--------------------------------------|----------------------------------|--------------------------------------|--------------------------------------|------------------------------------|
| Philippines | G6PD deficiency       | 50<br>(48 to 52)                     | 62<br>(59 to 64)                     | 0.24<br>(0.22 to 0.26)           | 78.71<br>(75.13 to 81.97)            | 55.11<br>(52.57 to 57.33)            | -1.02<br>(-1.1 to -0.93)           |
| Philippines | G6PD trait            | 201<br>(197 to 204)                  | 223<br>(219 to 227)                  | 0.11<br>(0.11 to 0.12)           | 317.29<br>(310.81 to 322.78)         | 199.24<br>(195.02 to 202.84)         | -1.41<br>(-1.57 to -1.26)          |
| Poland      | Inherited anemias     | 76<br>(74 to 79)                     | 53<br>(52 to 55)                     | -0.3<br>(-0.3 to -0.3)           | 199.93<br>(193.09 to 207.3)          | 138.87<br>(134.27 to 143.96)         | -0.89<br>(-1.23 to -0.55)          |
| Poland      | Thalassemias          | 0<br>(0 to 1)                        | 0<br>(0 to 0)                        | -0.58<br>(-0.6 to -0.55)         | 1.22<br>(0.81 to 1.92)               | 0.51<br>(0.35 to 0.77)               | -2.4<br>(-2.76 to -2.03)           |
| Poland      | Thalassemias trait    | 10<br>(9 to 13)                      | 7<br>(6 to 9)                        | -0.29<br>(-0.32 to -0.27)        | 26.73<br>(22.34 to 32.85)            | 18.73<br>(15.78 to 22.56)            | -0.66<br>(-1.02 to -0.3)           |
| Poland      | Sickle cell disorders | 0<br>(0 to 0)                        | 0<br>(0 to 0)                        | -0.28<br>(-0.31 to -0.25)        | 0.13<br>(0.1 to 0.17)                | 0.09<br>(0.07 to 0.12)               | -0.95<br>(-1.26 to -0.64)          |
| Poland      | Sickle cell trait     | 10<br>(8 to 11)                      | 7<br>(6 to 8)                        | -0.3<br>(-0.31 to -0.29)         | 25.09<br>(21.71 to 28.7)             | 17.45<br>(15.02 to 20.07)            | -0.83<br>(-1.16 to -0.51)          |
| Poland      | G6PD deficiency       | 18<br>(17 to 19)                     | 13<br>(13 to 14)                     | -0.26<br>(-0.27 to -0.26)        | 47.22<br>(45.1 to 49.25)             | 34.61<br>(33.01 to 36.06)            | -1.44<br>(-1.86 to -1.01)          |
| Poland      | G6PD trait            | 38<br>(37 to 39)                     | 26<br>(25 to 27)                     | -0.32<br>(-0.32 to -0.32)        | 99.53<br>(97.3 to 101.73)            | 67.47<br>(65.97 to 68.97)            | -0.72<br>(-1.08 to -0.36)          |
| Portugal    | Inherited anemias     | 24<br>(22 to 27)                     | 16<br>(15 to 18)                     | -0.33<br>(-0.35 to -0.3)         | 240.16<br>(218.39 to 263.32)         | 153.59<br>(139.11 to 168.36)         | -1.65<br>(-1.82 to -1.47)          |
| Portugal    | Thalassemias          | 0<br>(0 to 0)                        | 0<br>(0 to 0)                        | -0.34<br>(-0.45 to -0.24)        | 0.13<br>(0.08 to 0.18)               | 0.08<br>(0.05 to 0.12)               | -2.72<br>(-3.85 to -1.58)          |
| Portugal    | Thalassemias trait    | 1<br>(1 to 1)                        | 1<br>(1 to 1)                        | -0.29<br>(-0.35 to -0.22)        | 11.2<br>(9.44 to 13.01)              | 7.56<br>(6.31 to 9.06)               | -1.78<br>(-2.29 to -1.27)          |
| Portugal    | Sickle cell disorders | 0<br>(0 to 0)                        | 0<br>(0 to 0)                        | -0.44<br>(-0.53 to -0.34)        | 1.61<br>(1.13 to 2.28)               | 0.86<br>(0.61 to 1.2)                | -2.43<br>(-2.58 to -2.29)          |
| Portugal    | Sickle cell trait     | 8<br>(7 to 10)                       | 5<br>(4 to 6)                        | -0.38<br>(-0.43 to -0.33)        | 80.23<br>(67.21 to 95.41)            | 47.32<br>(39.59 to 56.17)            | -1.97<br>(-2.07 to -1.86)          |

| <b>Regions</b> | <b>Causes</b>               | <b>Cases in<br/>1990<br/>No.×103<br/>(95% UI)</b> | <b>Cases in<br/>2019<br/>No.×103<br/>(95% UI)</b> | <b>Change in<br/>absolute<br/>number<br/>(%)</b> | <b>Rates in<br/>1990 per<br/>100000<br/>(95% UI)</b> | <b>Rates in<br/>2019 per<br/>100000<br/>(95% UI)</b> | <b>EAPC<br/>from 1990<br/>and 2019<br/>(95%CI)</b> |
|----------------|-----------------------------|---------------------------------------------------|---------------------------------------------------|--------------------------------------------------|------------------------------------------------------|------------------------------------------------------|----------------------------------------------------|
| Portugal       | G6PD<br>deficiency          | 1<br>(1 to 2)                                     | 1<br>(1 to 2)                                     | -0.07<br>(-0.15 to<br>0)                         | 13.95<br>(11.46 to<br>16.9)                          | 12.39<br>(9.52 to<br>15.74)                          | -0.84<br>(-1.11 to<br>-0.57)                       |
| Portugal       | G6PD trait                  | 13<br>(12 to 15)                                  | 9<br>(8 to 10)                                    | -0.33<br>(-0.35 to<br>-0.3)                      | 133.04<br>(119.6 to<br>147)                          | 85.38<br>(76.45 to<br>94.51)                         | -1.55<br>(-1.75 to<br>-1.35)                       |
| Puerto Rico    | Inherited<br>anemias        | 16<br>(14 to 18)                                  | 6<br>(6 to 7)                                     | -0.6<br>(-0.62 to<br>-0.59)                      | 444.38<br>(390.44 to<br>503.75)                      | 180.24<br>(158.19 to<br>204.37)                      | -3.19<br>(-3.41 to<br>-2.97)                       |
| Puerto Rico    | Thalassemi<br>as            | 0<br>(0 to 0)                                     | 0<br>(0 to 0)                                     | -0.37<br>(-0.61 to<br>0.36)                      | 0.01<br>(0 to 0.01)                                  | 0<br>(0 to 0.01)                                     | -1.75<br>(-2.2 to<br>-1.31)                        |
| Puerto Rico    | Thalassemi<br>as trait      | 0<br>(0 to 0)                                     | 0<br>(0 to 0)                                     | -0.54<br>(-0.61 to<br>-0.4)                      | 5.99<br>(4.58 to<br>7.46)                            | 2.81<br>(2.19 to<br>3.43)                            | -2.76<br>(-3.06 to<br>-2.45)                       |
| Puerto Rico    | Sickle<br>cell<br>disorders | 0<br>(0 to 0)                                     | 0<br>(0 to 0)                                     | -0.56<br>(-0.61 to<br>-0.5)                      | 2.77<br>(2.05 to<br>3.62)                            | 1.25<br>(0.91 to<br>1.68)                            | -2.89<br>(-3 to<br>-2.78)                          |
| Puerto Rico    | Sickle<br>cell trait        | 4<br>(4 to 5)                                     | 2<br>(2 to 2)                                     | -0.59<br>(-0.61 to<br>-0.56)                     | 124.26<br>(105.23 to<br>144.52)                      | 52.2<br>(43.53 to<br>61.35)                          | -3.09<br>(-3.25 to<br>-2.92)                       |
| Puerto Rico    | G6PD<br>deficiency          | 5<br>(4 to 6)                                     | 2<br>(2 to 2)                                     | -0.61<br>(-0.64 to<br>-0.59)                     | 141.96<br>(109.7 to<br>177.5)                        | 56.52<br>(43.45 to<br>69.89)                         | -3.24<br>(-3.5 to<br>-2.99)                        |
| Puerto Rico    | G6PD trait                  | 6<br>(5 to 7)                                     | 2<br>(2 to 3)                                     | -0.61<br>(-0.62 to<br>-0.6)                      | 169.4<br>(150.71 to<br>189.03)                       | 67.46<br>(60.02 to<br>75.22)                         | -3.24<br>(-3.48 to<br>-3)                          |
| Qatar          | Inherited<br>anemias        | 3<br>(3 to 4)                                     | 9<br>(8 to 9)                                     | 1.58<br>(1.52 to<br>1.64)                        | 757.46<br>(688.61 to<br>830.24)                      | 303.1<br>(275.42 to<br>331.44)                       | -3.17<br>(-3.36 to<br>-2.97)                       |
| Qatar          | Thalassemi<br>as            | 0<br>(0 to 0)                                     | 0<br>(0 to 0)                                     | 1.78<br>(1.45 to<br>2.16)                        | 0.62<br>(0.42 to<br>0.89)                            | 0.27<br>(0.19 to<br>0.37)                            | -3<br>(-3.19 to<br>-2.8)                           |
| Qatar          | Thalassemi<br>as trait      | 0<br>(0 to 0)                                     | 1<br>(1 to 1)                                     | 1.69<br>(1.54 to<br>1.85)                        | 82.07<br>(68.85 to<br>97.53)                         | 34.27<br>(28.88 to<br>40.36)                         | -3.07<br>(-3.27 to<br>-2.87)                       |
| Qatar          | Sickle<br>cell<br>disorders | 0<br>(0 to 0)                                     | 0<br>(0 to 0)                                     | 1.55<br>(1.36 to<br>1.73)                        | 2.72<br>(2.1 to<br>3.47)                             | 1.08<br>(0.83 to<br>1.37)                            | -3.15<br>(-3.37 to<br>-2.93)                       |
| Qatar          | Sickle<br>cell trait        | 1<br>(1 to 1)                                     | 2<br>(2 to 2)                                     | 1.54<br>(1.44 to<br>1.63)                        | 154.23<br>(136.04 to<br>173.99)                      | 60.84<br>(53.62 to<br>68.66)                         | -3.19<br>(-3.4 to<br>-2.98)                        |

| <b>Regions</b>                 | <b>Causes</b>                | <b>Cases in<br/>1990<br/>No.×103<br/>(95% UI)</b> | <b>Cases in<br/>2019<br/>No.×103<br/>(95% UI)</b> | <b>Change in<br/>absolute<br/>number<br/>(%)</b> | <b>Rates in<br/>1990 per<br/>100000<br/>(95% UI)</b> | <b>Rates in<br/>2019 per<br/>100000<br/>(95% UI)</b> | <b>EAPC<br/>from 1990<br/>and 2019<br/>(95%CI)</b> |
|--------------------------------|------------------------------|---------------------------------------------------|---------------------------------------------------|--------------------------------------------------|------------------------------------------------------|------------------------------------------------------|----------------------------------------------------|
| <b>Qatar</b>                   | G6PD<br>deficiency           | 1<br>(0 to 1)                                     | 2<br>(1 to 2)                                     | 1.55<br>(1.43 to<br>1.68)                        | 136.83<br>(105.46 to<br>169.9)                       | 54.21<br>(41.92 to<br>68.26)                         | -3.19<br>(-3.39 to<br>-3)                          |
| <b>Qatar</b>                   | G6PD trait                   | 2<br>(2 to 2)                                     | 4<br>(4 to 5)                                     | 1.57<br>(1.51 to<br>1.66)                        | 380.99<br>(345.93 to<br>413.41)                      | 152.44<br>(138.89 to<br>164.74)                      | -3.17<br>(-3.36 to<br>-2.97)                       |
| <b>Republic of<br/>Korea</b>   | <b>Inherited<br/>anemias</b> | 52<br>(46 to 58)                                  | 30<br>(26 to 33)                                  | -0.43<br>(-0.45 to<br>-0.4)                      | 116.68<br>(103.36 to<br>131.16)                      | 55.53<br>(49.26 to<br>62.14)                         | -2.96<br>(-3.06 to<br>-2.85)                       |
| <b>Republic of<br/>Korea</b>   | Thalassemi<br>as             | 0<br>(0 to 0)                                     | 0<br>(0 to 0)                                     | -0.5<br>(-0.56 to<br>-0.41)                      | 0.69<br>(0.46 to<br>1.07)                            | 0.29<br>(0.2 to<br>0.43)                             | -3.12<br>(-3.27 to<br>-2.97)                       |
| <b>Republic of<br/>Korea</b>   | Thalassemi<br>as trait       | 3<br>(3 to 4)                                     | 3<br>(3 to 4)                                     | 0.07<br>(-0.05 to<br>0.19)                       | 7.18<br>(5.66 to<br>8.86)                            | 6.36<br>(4.85 to<br>7.78)                            | -0.67<br>(-0.96 to<br>-0.39)                       |
| <b>Republic of<br/>Korea</b>   | Sickle<br>cell<br>disorders  | 0<br>(0 to 0)                                     | 0<br>(0 to 0)                                     | -0.42<br>(-0.49 to<br>-0.33)                     | 0.02<br>(0.01 to<br>0.02)                            | 0.01<br>(0.01 to<br>0.01)                            | -2.44<br>(-2.7 to<br>-2.19)                        |
| <b>Republic of<br/>Korea</b>   | Sickle<br>cell trait         | 3<br>(3 to 4)                                     | 2<br>(2 to 2)                                     | -0.42<br>(-0.46 to<br>-0.33)                     | 7.44<br>(6.02 to<br>9.14)                            | 3.6<br>(2.88 to<br>4.35)                             | -2.51<br>(-2.72 to<br>-2.3)                        |
| <b>Republic of<br/>Korea</b>   | G6PD<br>deficiency           | 3<br>(3 to 4)                                     | 2<br>(1 to 2)                                     | -0.52<br>(-0.56 to<br>-0.49)                     | 7.82<br>(5.93 to<br>10.02)                           | 3.1<br>(2.33 to<br>3.99)                             | -4.77<br>(-5.23 to<br>-4.31)                       |
| <b>Republic of<br/>Korea</b>   | G6PD trait                   | 41<br>(36 to 47)                                  | 23<br>(20 to 26)                                  | -0.46<br>(-0.48 to<br>-0.43)                     | 93.53<br>(81.89 to<br>105.49)                        | 42.17<br>(36.67 to<br>47.82)                         | -3.11<br>(-3.21 to<br>-3.01)                       |
| <b>Republic of<br/>Moldova</b> | <b>Inherited<br/>anemias</b> | 10<br>(9 to 11)                                   | 4<br>(4 to 5)                                     | -0.57<br>(-0.58 to<br>-0.57)                     | 223.49<br>(198.54 to<br>250.51)                      | 114.65<br>(102.07 to<br>128.35)                      | -1.57<br>(-1.9 to<br>-1.25)                        |
| <b>Republic of<br/>Moldova</b> | Thalassemi<br>as             | 0<br>(0 to 0)                                     | 0<br>(0 to 0)                                     | -0.71<br>(-0.74 to<br>-0.67)                     | 1.06<br>(0.73 to<br>1.55)                            | 0.37<br>(0.27 to<br>0.53)                            | -2.81<br>(-3.14 to<br>-2.47)                       |
| <b>Republic of<br/>Moldova</b> | Thalassemi<br>as trait       | 2<br>(2 to 2)                                     | 1<br>(1 to 1)                                     | -0.56<br>(-0.59 to<br>-0.53)                     | 45.71<br>(38 to<br>55.49)                            | 24.24<br>(20.21 to<br>29)                            | -1.46<br>(-1.77 to<br>-1.14)                       |
| <b>Republic of<br/>Moldova</b> | Sickle<br>cell<br>disorders  | 0<br>(0 to 0)                                     | 0<br>(0 to 0)                                     | -0.56<br>(-0.62 to<br>-0.47)                     | 0.01<br>(0.01 to<br>0.02)                            | 0.01<br>(0 to 0.01)                                  | -1.5<br>(-1.79 to<br>-1.21)                        |
| <b>Republic of<br/>Moldova</b> | Sickle<br>cell trait         | 0<br>(0 to 0)                                     | 0<br>(0 to 0)                                     | -0.57<br>(-0.6 to<br>-0.53)                      | 8.59<br>(6.85 to<br>10.52)                           | 4.42<br>(3.56 to<br>5.4)                             | -1.54<br>(-1.85 to<br>-1.22)                       |

| <b>Regions</b>         | <b>Causes</b>               | <b>Cases in<br/>1990<br/>No.×103<br/>(95% UI)</b> | <b>Cases in<br/>2019<br/>No.×103<br/>(95% UI)</b> | <b>Change in<br/>absolute<br/>number<br/>(%)</b> | <b>Rates in<br/>1990 per<br/>100000<br/>(95% UI)</b> | <b>Rates in<br/>2019 per<br/>100000<br/>(95% UI)</b> | <b>EAPC<br/>from 1990<br/>and 2019<br/>(95%CI)</b> |
|------------------------|-----------------------------|---------------------------------------------------|---------------------------------------------------|--------------------------------------------------|------------------------------------------------------|------------------------------------------------------|----------------------------------------------------|
| Republic of<br>Moldova | G6PD<br>deficiency          | 2<br>(1 to 2)                                     | 1<br>(1 to 1)                                     | -0.55<br>(-0.55 to<br>-0.55)                     | 34.85<br>(26.75 to<br>43.36)                         | 18.87<br>(14.49 to<br>23.48)                         | -1.7<br>(-2.02 to<br>-1.37)                        |
| Republic of<br>Moldova | G6PD trait                  | 6<br>(5 to 7)                                     | 2<br>(2 to 3)                                     | -0.58<br>(-0.58 to<br>-0.58)                     | 133.28<br>(118.43 to<br>149.2)                       | 66.75<br>(59.31 to<br>74.72)                         | -1.58<br>(-1.91 to<br>-1.24)                       |
| Romania                | Inherited<br>anemias        | 35<br>(31 to 40)                                  | 25<br>(22 to 28)                                  | -0.3<br>(-0.32 to<br>-0.29)                      | 151.06<br>(134.31 to<br>169.07)                      | 128.03<br>(112.78 to<br>144.34)                      | -0.54<br>(-0.74 to<br>-0.33)                       |
| Romania                | Thalassemi<br>as            | 0<br>(0 to 0)                                     | 0<br>(0 to 0)                                     | -0.64<br>(-0.68 to<br>-0.59)                     | 1.17<br>(0.74 to<br>1.87)                            | 0.51<br>(0.33 to<br>0.8)                             | -2.3<br>(-2.48 to<br>-2.12)                        |
| Romania                | Thalassemi<br>as trait      | 3<br>(2 to 3)                                     | 2<br>(2 to 2)                                     | -0.34<br>(-0.4 to<br>-0.27)                      | 12.11<br>(10.26 to<br>14.51)                         | 9.67<br>(8.24 to<br>11.28)                           | -0.31<br>(-0.5 to<br>-0.12)                        |
| Romania                | Sickle<br>cell<br>disorders | 0<br>(0 to 0)                                     | 0<br>(0 to 0)                                     | -0.29<br>(-0.36 to<br>-0.21)                     | 0.13<br>(0.1 to<br>0.17)                             | 0.11<br>(0.08 to<br>0.15)                            | -0.19<br>(-0.37 to<br>-0.01)                       |
| Romania                | Sickle<br>cell trait        | 5<br>(5 to 6)                                     | 4<br>(3 to 4)                                     | -0.35<br>(-0.38 to<br>-0.31)                     | 23.11<br>(19.85 to<br>26.67)                         | 18.23<br>(15.56 to<br>21.15)                         | -0.37<br>(-0.54 to<br>-0.2)                        |
| Romania                | G6PD<br>deficiency          | 6<br>(4 to 7)                                     | 7<br>(5 to 8)                                     | 0.14<br>(0.06 to<br>0.21)                        | 24.86<br>(19.07 to<br>30.92)                         | 34.38<br>(26.38 to<br>42.93)                         | -1.09<br>(-1.87 to<br>-0.29)                       |
| Romania                | G6PD trait                  | 21<br>(19 to 23)                                  | 13<br>(11 to 14)                                  | -0.4<br>(-0.4 to<br>-0.4)                        | 89.68<br>(79.11 to<br>100.41)                        | 65.13<br>(57.46 to<br>72.93)                         | -0.52<br>(-0.71 to<br>-0.33)                       |
| Russian<br>Federation  | Inherited<br>anemias        | 241<br>(231 to<br>253)                            | 215<br>(206 to<br>225)                            | -0.11<br>(-0.11 to<br>-0.1)                      | 159.55<br>(153.01 to<br>167.71)                      | 146.34<br>(140.38 to<br>153.57)                      | 1.3<br>(0.78 to<br>1.82)                           |
| Russian<br>Federation  | Thalassemi<br>as            | 1<br>(1 to 2)                                     | 1<br>(1 to 1)                                     | -0.41<br>(-0.45 to<br>-0.35)                     | 0.81<br>(0.56 to<br>1.18)                            | 0.49<br>(0.36 to<br>0.7)                             | -0.07<br>(-0.59 to<br>0.45)                        |
| Russian<br>Federation  | Thalassemi<br>as trait      | 50<br>(41 to 61)                                  | 45<br>(38 to 55)                                  | -0.09<br>(-0.11 to<br>-0.06)                     | 32.96<br>(27.43 to<br>40.3)                          | 30.95<br>(25.92 to<br>37.62)                         | 1.38<br>(0.87 to<br>1.89)                          |
| Russian<br>Federation  | Sickle<br>cell<br>disorders | 0<br>(0 to 0)                                     | 0<br>(0 to 0)                                     | -0.09<br>(-0.13 to<br>-0.01)                     | 0.01<br>(0.01 to<br>0.01)                            | 0.01<br>(0.01 to<br>0.01)                            | 1.33<br>(0.85 to<br>1.82)                          |
| Russian<br>Federation  | Sickle<br>cell trait        | 9<br>(8 to 11)                                    | 8<br>(7 to 10)                                    | -0.11<br>(-0.13 to<br>-0.07)                     | 6.2<br>(5.01 to<br>7.54)                             | 5.69<br>(4.66 to<br>6.93)                            | 1.32<br>(0.82 to<br>1.83)                          |

| <b>Regions</b>        | <b>Causes</b>         | <b>Cases in<br/>1990<br/>No.×103<br/>(95% UI)</b> | <b>Cases in<br/>2019<br/>No.×103<br/>(95% UI)</b> | <b>Change in<br/>absolute<br/>number<br/>(%)</b> | <b>Rates in<br/>1990 per<br/>100000<br/>(95% UI)</b> | <b>Rates in<br/>2019 per<br/>100000<br/>(95% UI)</b> | <b>EAPC<br/>from 1990<br/>and 2019<br/>(95%CI)</b> |
|-----------------------|-----------------------|---------------------------------------------------|---------------------------------------------------|--------------------------------------------------|------------------------------------------------------|------------------------------------------------------|----------------------------------------------------|
| Russian Federation    | G6PD deficiency       | 37<br>(35 to 38)                                  | 35<br>(33 to 36)                                  | -0.06<br>(-0.06 to -0.06)                        | 24.32<br>(23.21 to 25.35)                            | 23.52<br>(22.45 to 24.52)                            | 1.18<br>(0.68 to 1.68)                             |
| Russian Federation    | G6PD trait            | 144<br>(141 to 147)                               | 126<br>(123 to 128)                               | -0.13<br>(-0.13 to -0.13)                        | 95.26<br>(93.1 to 97.25)                             | 85.67<br>(83.75 to 87.47)                            | 1.31<br>(0.78 to 1.84)                             |
| Rwanda                | Inherited anemias     | 70<br>(62 to 78)                                  | 70<br>(63 to 79)                                  | 0.01<br>(-0.02 to 0.04)                          | 972.78<br>(861.79 to 1092.44)                        | 554.94<br>(495.17 to 622.33)                         | -1.95<br>(-2.13 to -1.77)                          |
| Rwanda                | Thalassemias          | 0<br>(0 to 0)                                     | 0<br>(0 to 0)                                     | 1.52<br>(1.21 to 2.1)                            | 0.09<br>(0.05 to 0.13)                               | 0.12<br>(0.07 to 0.19)                               | 0.8<br>(0.57 to 1.03)                              |
| Rwanda                | Thalassemias trait    | 2<br>(1 to 2)                                     | 3<br>(2 to 3)                                     | 0.62<br>(0.51 to 0.84)                           | 21.65<br>(17.04 to 26.91)                            | 19.84<br>(15.25 to 24.83)                            | -0.56<br>(-0.72 to -0.4)                           |
| Rwanda                | Sickle cell disorders | 0<br>(0 to 0)                                     | 0<br>(0 to 0)                                     | 0.03<br>(-0.07 to 0.14)                          | 1.16<br>(0.86 to 1.54)                               | 0.68<br>(0.5 to 0.91)                                | -1.75<br>(-2.21 to -1.3)                           |
| Rwanda                | Sickle cell trait     | 10<br>(9 to 12)                                   | 11<br>(9 to 12)                                   | 0.07<br>(0.01 to 0.12)                           | 139.12<br>(120.14 to 160.92)                         | 83.98<br>(72.1 to 97.77)                             | -1.73<br>(-2.01 to -1.44)                          |
| Rwanda                | G6PD deficiency       | 16<br>(13 to 20)                                  | 13<br>(10 to 17)                                  | -0.17<br>(-0.23 to -0.1)                         | 225.8<br>(174.42 to 283.79)                          | 105.61<br>(81.84 to 132.01)                          | -2.47<br>(-2.76 to -2.18)                          |
| Rwanda                | G6PD trait            | 42<br>(38 to 46)                                  | 44<br>(39 to 48)                                  | 0.04<br>(0.01 to 0.08)                           | 584.96<br>(525.49 to 638.97)                         | 344.7<br>(309.55 to 381)                             | -1.89<br>(-2.02 to -1.76)                          |
| Saint Kitts and Nevis | Inherited anemias     | 0<br>(0 to 0)                                     | 0<br>(0 to 0)                                     | -0.2<br>(-0.23 to -0.17)                         | 570.75<br>(503.15 to 646.04)                         | 317.02<br>(278.36 to 358.03)                         | -2.03<br>(-2.06 to -2.01)                          |
| Saint Kitts and Nevis | Thalassemias          | 0<br>(0 to 0)                                     | 0<br>(0 to 0)                                     | 0.28<br>(-0.23 to 1.5)                           | 0.01<br>(0.01 to 0.02)                               | 0.01<br>(0.01 to 0.01)                               | -0.5<br>(-0.79 to -0.2)                            |
| Saint Kitts and Nevis | Thalassemias trait    | 0<br>(0 to 0)                                     | 0<br>(0 to 0)                                     | -0.08<br>(-0.23 to 0.15)                         | 8.05<br>(6.24 to 10.17)                              | 5.14<br>(4.02 to 6.25)                               | -1.58<br>(-1.71 to -1.45)                          |
| Saint Kitts and Nevis | Sickle cell disorders | 0<br>(0 to 0)                                     | 0<br>(0 to 0)                                     | -0.1<br>(-0.2 to 0.01)                           | 5.82<br>(4.23 to 7.79)                               | 3.65<br>(2.59 to 4.94)                               | -1.71<br>(-1.87 to -1.56)                          |
| Saint Kitts and Nevis | Sickle cell trait     | 0<br>(0 to 0)                                     | 0<br>(0 to 0)                                     | -0.17<br>(-0.22 to -0.12)                        | 182.98<br>(152.32 to 215.71)                         | 105.89<br>(87.87 to 126.49)                          | -1.91<br>(-1.97 to -1.86)                          |

| <b>Regions</b>                            | <b>Causes</b>               | <b>Cases in<br/>1990<br/>No.×103<br/>(95% UI)</b> | <b>Cases in<br/>2019<br/>No.×103<br/>(95% UI)</b> | <b>Change in<br/>absolute<br/>number<br/>(%)</b> | <b>Rates in<br/>1990 per<br/>100000<br/>(95% UI)</b> | <b>Rates in<br/>2019 per<br/>100000<br/>(95% UI)</b> | <b>EAPC<br/>from 1990<br/>and 2019<br/>(95%CI)</b> |
|-------------------------------------------|-----------------------------|---------------------------------------------------|---------------------------------------------------|--------------------------------------------------|------------------------------------------------------|------------------------------------------------------|----------------------------------------------------|
| Saint Kitts<br>and Nevis                  | G6PD<br>deficiency          | 0<br>(0 to 0)                                     | 0<br>(0 to 0)                                     | -0.22<br>(-0.29 to<br>-0.15)                     | 170.17<br>(131.37 to<br>211.35)                      | 91.74<br>(70.87 to<br>113.56)                        | -2.12<br>(-2.18 to<br>-2.06)                       |
| Saint Kitts<br>and Nevis                  | G6PD trait                  | 0<br>(0 to 0)                                     | 0<br>(0 to 0)                                     | -0.22<br>(-0.25 to<br>-0.18)                     | 203.71<br>(182.03 to<br>224.53)                      | 110.59<br>(98.5 to<br>123.18)                        | -2.1<br>(-2.15 to<br>-2.06)                        |
| Saint Lucia                               | Inherited<br>anemias        | 1<br>(1 to 1)                                     | 0<br>(0 to 1)                                     | -0.53<br>(-0.55 to<br>-0.52)                     | 757.24<br>(667.25 to<br>856.73)                      | 279<br>(245.86 to<br>314.91)                         | -3.58<br>(-3.72 to<br>-3.44)                       |
| Saint Lucia                               | Thalassemi<br>as            | 0<br>(0 to 0)                                     | 0<br>(0 to 0)                                     | -0.23<br>(-0.53 to<br>0.54)                      | 0.01<br>(0.01 to<br>0.02)                            | 0.01<br>(0 to 0.01)                                  | -1.95<br>(-2.13 to<br>-1.77)                       |
| Saint Lucia                               | Thalassemi<br>as trait      | 0<br>(0 to 0)                                     | 0<br>(0 to 0)                                     | -0.45<br>(-0.53 to<br>-0.29)                     | 9.93<br>(7.53 to<br>12.75)                           | 4.3<br>(3.34 to<br>5.21)                             | -2.99<br>(-3.04 to<br>-2.93)                       |
| Saint Lucia                               | Sickle<br>cell<br>disorders | 0<br>(0 to 0)                                     | 0<br>(0 to 0)                                     | -0.51<br>(-0.57 to<br>-0.44)                     | 9.1<br>(6.59 to<br>12.23)                            | 3.51<br>(2.5 to<br>4.66)                             | -3.77<br>(-4.14 to<br>-3.39)                       |
| Saint Lucia                               | Sickle<br>cell trait        | 0<br>(0 to 0)                                     | 0<br>(0 to 0)                                     | -0.53<br>(-0.56 to<br>-0.5)                      | 253.67<br>(210.32 to<br>298.6)                       | 93.25<br>(77.6 to<br>109.73)                         | -3.75<br>(-4 to<br>-3.51)                          |
| Saint Lucia                               | G6PD<br>deficiency          | 0<br>(0 to 0)                                     | 0<br>(0 to 0)                                     | -0.54<br>(-0.56 to<br>-0.5)                      | 220.73<br>(170.43 to<br>278.26)                      | 80.71<br>(62.34 to<br>99.95)                         | -3.51<br>(-3.6 to<br>-3.43)                        |
| Saint Lucia                               | G6PD trait                  | 0<br>(0 to 0)                                     | 0<br>(0 to 0)                                     | -0.53<br>(-0.56 to<br>-0.51)                     | 263.8<br>(234.77 to<br>294.71)                       | 97.22<br>(86.71 to<br>106.93)                        | -3.49<br>(-3.59 to<br>-3.4)                        |
| Saint<br>Vincent and<br>the<br>Grenadines | Inherited<br>anemias        | 1<br>(1 to 1)                                     | 0<br>(0 to 0)                                     | -0.44<br>(-0.46 to<br>-0.42)                     | 679.95<br>(603.66 to<br>768.78)                      | 369.83<br>(325.38 to<br>417.44)                      | -2.09<br>(-2.16 to<br>-2.02)                       |
| Saint<br>Vincent and<br>the<br>Grenadines | Thalassemi<br>as            | 0<br>(0 to 0)                                     | 0<br>(0 to 0)                                     | -0.04<br>(-0.43 to<br>0.84)                      | 0.01<br>(0.01 to<br>0.02)                            | 0.01<br>(0.01 to<br>0.02)                            | -0.44<br>(-0.68 to<br>-0.19)                       |
| Saint<br>Vincent and<br>the<br>Grenadines | Thalassemi<br>as trait      | 0<br>(0 to 0)                                     | 0<br>(0 to 0)                                     | -0.32<br>(-0.43 to<br>-0.15)                     | 8.92<br>(6.94 to<br>11.23)                           | 5.89<br>(4.59 to<br>7.15)                            | -1.52<br>(-1.6 to<br>-1.45)                        |
| Saint<br>Vincent and<br>the<br>Grenadines | Sickle<br>cell<br>disorders | 0<br>(0 to 0)                                     | 0<br>(0 to 0)                                     | -0.46<br>(-0.52 to<br>-0.39)                     | 8.93<br>(6.47 to<br>12.2)                            | 4.7<br>(3.34 to<br>6.36)                             | -2.12<br>(-2.43 to<br>-1.81)                       |

| Regions                                   | Causes                      | Cases in<br>1990<br>No.×103<br>(95% UI) | Cases in<br>2019<br>No.×103<br>(95% UI) | Change in<br>absolute<br>number<br>(%) | Rates in<br>1990 per<br>100000<br>(95% UI) | Rates in<br>2019 per<br>100000<br>(95% UI) | EAPC<br>from 1990<br>and 2019<br>(95%CI) |
|-------------------------------------------|-----------------------------|-----------------------------------------|-----------------------------------------|----------------------------------------|--------------------------------------------|--------------------------------------------|------------------------------------------|
| Saint<br>Vincent and<br>the<br>Grenadines | Sickle<br>cell trait        | 0<br>(0 to 0)                           | 0<br>(0 to 0)                           | -0.47<br>(-0.5 to<br>-0.44)            | 239.89<br>(200.09 to<br>287.38)            | 124.5<br>(103.26 to<br>148.03)             | -2.17<br>(-2.35 to<br>-1.99)             |
| Saint<br>Vincent and<br>the<br>Grenadines | G6PD<br>deficiency          | 0<br>(0 to 0)                           | 0<br>(0 to 0)                           | -0.43<br>(-0.47 to<br>-0.4)            | 193.14<br>(149.67 to<br>241.61)            | 106.56<br>(82.39 to<br>133.6)              | -2.08<br>(-2.11 to<br>-2.05)             |
| Saint<br>Vincent and<br>the<br>Grenadines | G6PD trait                  | 0<br>(0 to 0)                           | 0<br>(0 to 0)                           | -0.42<br>(-0.45 to<br>-0.4)            | 229.07<br>(204.62 to<br>254.14)            | 128.17<br>(114.29 to<br>142.09)            | -2.04<br>(-2.07 to<br>-2.01)             |
| Samoa                                     | Inherited<br>anemias        | 1<br>(1 to 1)                           | 1<br>(1 to 1)                           | 0.26<br>(0.24 to<br>0.29)              | 398.49<br>(354.89 to<br>445.34)            | 389.96<br>(346.72 to<br>436.58)            | 0.17<br>(-0.15 to<br>0.49)               |
| Samoa                                     | Thalassemi<br>as            | 0<br>(0 to 0)                           | 0<br>(0 to 0)                           | 0.02<br>(-0.09 to<br>0.17)             | 1.98<br>(1.08 to<br>3.07)                  | 1.57<br>(0.87 to<br>2.41)                  | 0.56<br>(-0.48 to<br>1.61)               |
| Samoa                                     | Thalassemi<br>as trait      | 0<br>(0 to 0)                           | 0<br>(0 to 0)                           | 0.1<br>(0.04 to<br>0.17)               | 62.37<br>(48.02 to<br>76.16)               | 53.21<br>(41.03 to<br>64.8)                | 0.12<br>(-0.36 to<br>0.61)               |
| Samoa                                     | Sickle<br>cell<br>disorders | 0<br>(0 to 0)                           | 0<br>(0 to 0)                           | 0.23<br>(0.13 to<br>1.78)              | 0<br>(0 to 0)                              | 0<br>(0 to 0)                              | 0.01<br>(-0.32 to<br>0.34)               |
| Samoa                                     | Sickle<br>cell trait        | 0<br>(0 to 0)                           | 0<br>(0 to 0)                           | 0.21<br>(0.13 to<br>1.27)              | 2.37<br>(1.03 to<br>3.83)                  | 2.23<br>(0.96 to<br>3.43)                  | -0.04<br>(-0.35 to<br>0.26)              |
| Samoa                                     | G6PD<br>deficiency          | 0<br>(0 to 0)                           | 0<br>(0 to 0)                           | 0.37<br>(0.31 to<br>0.46)              | 82.67<br>(63.91 to<br>102.53)              | 87.89<br>(68.1 to<br>109.55)               | 0.38<br>(0.01 to<br>0.75)                |
| Samoa                                     | G6PD trait                  | 0<br>(0 to 0)                           | 1<br>(0 to 1)                           | 0.27<br>(0.25 to<br>0.3)               | 249.1<br>(223.93 to<br>272.51)             | 245.06<br>(222.19 to<br>266.49)            | 0.09<br>(-0.2 to<br>0.39)                |
| San Marino                                | Inherited<br>anemias        | 0<br>(0 to 0)                           | 0<br>(0 to 0)                           | 0.17<br>(0.14 to<br>0.2)               | 200.39<br>(179.41 to<br>222.43)            | 167.17<br>(149.56 to<br>186.1)             | -0.85<br>(-1.04 to<br>-0.67)             |
| San Marino                                | Thalassemi<br>as            | 0<br>(0 to 0)                           | 0<br>(0 to 0)                           | 0.11<br>(-0.06 to<br>0.27)             | 0.14<br>(0.1 to<br>0.2)                    | 0.11<br>(0.08 to<br>0.15)                  | -1.84<br>(-2.74 to<br>-0.92)             |
| San Marino                                | Thalassemi<br>as trait      | 0<br>(0 to 0)                           | 0<br>(0 to 0)                           | 0.2<br>(0.13 to<br>0.28)               | 17.71<br>(15.35 to<br>20.34)               | 15.16<br>(13.04 to<br>17.41)               | -0.95<br>(-1.28 to<br>-0.61)             |

| Regions               | Causes                | Cases in 1990<br>No.×103<br>(95% UI) | Cases in 2019<br>No.×103<br>(95% UI) | Change in absolute number<br>(%) | Rates in 1990 per 100000<br>(95% UI) | Rates in 2019 per 100000<br>(95% UI) | EAPC from 1990 and 2019<br>(95%CI) |
|-----------------------|-----------------------|--------------------------------------|--------------------------------------|----------------------------------|--------------------------------------|--------------------------------------|------------------------------------|
| San Marino            | Sickle cell disorders | 0<br>(0 to 0)                        | 0<br>(0 to 0)                        | 0.09<br>(−0.02 to 0.2)           | 0.16<br>(0.11 to 0.21)               | 0.12<br>(0.09 to 0.16)               | −1.15<br>(−1.36 to −0.93)          |
| San Marino            | Sickle cell trait     | 0<br>(0 to 0)                        | 0<br>(0 to 0)                        | 0.12<br>(0.04 to 0.18)           | 21.87<br>(17.68 to 26.05)            | 17.41<br>(14.33 to 20.95)            | −1.04<br>(−1.24 to −0.84)          |
| San Marino            | G6PD deficiency       | 0<br>(0 to 0)                        | 0<br>(0 to 0)                        | 0.23<br>(0.2 to 0.28)            | 31.37<br>(24.12 to 39.07)            | 27.55<br>(21.18 to 34.55)            | −0.68<br>(−0.83 to −0.54)          |
| San Marino            | G6PD trait            | 0<br>(0 to 0)                        | 0<br>(0 to 0)                        | 0.16<br>(0.12 to 0.21)           | 129.14<br>(115.68 to 142.89)         | 106.82<br>(95.51 to 118.18)          | −0.85<br>(−1.03 to −0.67)          |
| Sao Tome and Principe | Inherited anemias     | 2<br>(2 to 2)                        | 2<br>(2 to 2)                        | −0.07<br>(−0.1 to −0.05)         | 1714.01<br>(1547.72 to 1887.84)      | 940.34<br>(852.04 to 1025.99)        | −2.15<br>(−2.44 to −1.85)          |
| Sao Tome and Principe | Thalassemias          | 0<br>(0 to 0)                        | 0<br>(0 to 0)                        | 0.3<br>(0.12 to 0.51)            | 0.26<br>(0.18 to 0.38)               | 0.2<br>(0.14 to 0.28)                | −1.02<br>(−1.26 to −0.77)          |
| Sao Tome and Principe | Thalassemias trait    | 0<br>(0 to 0)                        | 0<br>(0 to 0)                        | 0.1<br>(0.04 to 0.17)            | 69.96<br>(58.25 to 84.58)            | 45.62<br>(38.27 to 54.58)            | −1.58<br>(−1.82 to −1.33)          |
| Sao Tome and Principe | Sickle cell disorders | 0<br>(0 to 0)                        | 0<br>(0 to 0)                        | −0.29<br>(−0.37 to −0.19)        | 40.46<br>(30.52 to 52.9)             | 17.01<br>(12.74 to 22.12)            | −2.98<br>(−3.49 to −2.47)          |
| Sao Tome and Principe | Sickle cell trait     | 1<br>(1 to 1)                        | 1<br>(1 to 1)                        | −0.16<br>(−0.2 to −0.1)          | 680.97<br>(597.13 to 773.93)         | 338.83<br>(291.94 to 386.61)         | −2.45<br>(−2.82 to −2.08)          |
| Sao Tome and Principe | G6PD deficiency       | 0<br>(0 to 0)                        | 0<br>(0 to 0)                        | −0.04<br>(−0.11 to 0.03)         | 304.6<br>(235.47 to 377.86)          | 172.83<br>(133.49 to 214.68)         | −1.99<br>(−2.26 to −1.73)          |
| Sao Tome and Principe | G6PD trait            | 1<br>(1 to 1)                        | 1<br>(1 to 1)                        | 0<br>(−0.03 to 0.03)             | 617.77<br>(560.24 to 670.66)         | 365.85<br>(332.1 to 397.06)          | −1.92<br>(−2.16 to −1.67)          |
| Saudi Arabia          | Inherited anemias     | 306<br>(297 to 314)                  | 211<br>(192 to 230)                  | −0.31<br>(−0.37 to −0.25)        | 1904.66<br>(1852.19 to 1956.93)      | 589.5<br>(538.6 to 643.96)           | −4.05<br>(−4.27 to −3.84)          |
| Saudi Arabia          | Thalassemias          | 0<br>(0 to 0)                        | 0<br>(0 to 0)                        | −0.11<br>(−0.19 to 0)            | 2.05<br>(1.55 to 2.57)               | 0.82<br>(0.63 to 1.06)               | −3.17<br>(−3.24 to −3.1)           |
| Saudi Arabia          | Thalassemias trait    | 28<br>(25 to 31)                     | 25<br>(22 to 28)                     | −0.11<br>(−0.15 to −0.06)        | 174.44<br>(153.36 to 194.23)         | 69.38<br>(61.41 to 78.72)            | −3.19<br>(−3.26 to −3.13)          |



| Regions      | Causes                | Cases in<br>1990<br>No.×103<br>(95% UI) | Cases in<br>2019<br>No.×103<br>(95% UI) | Change in<br>absolute<br>number<br>(%) | Rates in<br>1990 per<br>100000<br>(95% UI) | Rates in<br>2019 per<br>100000<br>(95% UI) | EAPC<br>from 1990<br>and 2019<br>(95%CI) |
|--------------|-----------------------|-----------------------------------------|-----------------------------------------|----------------------------------------|--------------------------------------------|--------------------------------------------|------------------------------------------|
| Saudi Arabia | Sickle cell disorders | 8<br>(7 to 8)                           | 1<br>(1 to 2)                           | -0.81<br>(-0.84 to -0.78)              | 47.19<br>(43.53 to 50.81)                  | 4<br>(3.3 to 4.78)                         | -9.51<br>(-10.43 to -8.57)               |
| Saudi Arabia | Sickle cell trait     | 111<br>(107 to 115)                     | 48<br>(44 to 52)                        | -0.57<br>(-0.6 to -0.53)               | 692.78<br>(668.55 to 714.87)               | 134.07<br>(122.55 to 145.92)               | -6.16<br>(-6.63 to -5.7)                 |
| Saudi Arabia | G6PD deficiency       | 51<br>(48 to 55)                        | 45<br>(35 to 57)                        | -0.12<br>(-0.31 to 0.09)               | 320.81<br>(299.99 to 344.04)               | 126.83<br>(97.64 to 159.62)                | -2.01<br>(-2.59 to -1.42)                |
| Saudi Arabia | G6PD trait            | 107<br>(104 to 110)                     | 91<br>(84 to 97)                        | -0.15<br>(-0.21 to -0.1)               | 667.39<br>(649.7 to 685.3)                 | 254.4<br>(234.96 to 271.58)                | -3.33<br>(-3.39 to -3.27)                |
| Senegal      | Inherited anemias     | 159<br>(152 to 167)                     | 211<br>(190 to 235)                     | 0.33<br>(0.21 to 0.45)                 | 2092.52<br>(1992.41 to 2186.83)            | 1396.93<br>(1257.59 to 1551.14)            | -1.34<br>(-1.64 to -1.03)                |
| Senegal      | Thalassemias          | 0<br>(0 to 0)                           | 0<br>(0 to 0)                           | 1.25<br>(0.91 to 1.65)                 | 0.16<br>(0.11 to 0.21)                     | 0.18<br>(0.12 to 0.24)                     | 0.44<br>(0.34 to 0.54)                   |
| Senegal      | Thalassemias trait    | 4<br>(3 to 5)                           | 7<br>(6 to 8)                           | 0.6<br>(0.51 to 0.7)                   | 54.66<br>(45.91 to 64.66)                  | 43.92<br>(37.13 to 51.7)                   | -0.67<br>(-0.75 to -0.59)                |
| Senegal      | Sickle cell disorders | 2<br>(1 to 2)                           | 2<br>(2 to 3)                           | 0.35<br>(0.24 to 0.47)                 | 23.15<br>(18.59 to 27.96)                  | 15.76<br>(12.69 to 19.07)                  | -1.22<br>(-1.32 to -1.13)                |
| Senegal      | Sickle cell trait     | 42<br>(38 to 47)                        | 57<br>(51 to 64)                        | 0.35<br>(0.29 to 0.42)                 | 555.23<br>(492.95 to 614.38)               | 378.27<br>(334.67 to 420.02)               | -1.21<br>(-1.3 to -1.11)                 |
| Senegal      | G6PD deficiency       | 47<br>(43 to 50)                        | 59<br>(46 to 74)                        | 0.27<br>(0.01 to 0.56)                 | 611.95<br>(560.43 to 661.88)               | 391.42<br>(302.25 to 487.81)               | -1.58<br>(-2.39 to -0.77)                |
| Senegal      | G6PD trait            | 65<br>(63 to 66)                        | 86<br>(79 to 92)                        | 0.33<br>(0.22 to 0.43)                 | 847.37<br>(822.03 to 869.98)               | 567.39<br>(519.08 to 611.14)               | -1.31<br>(-1.59 to -1.03)                |
| Serbia       | Inherited anemias     | 20<br>(18 to 23)                        | 12<br>(11 to 14)                        | -0.4<br>(-0.42 to -0.39)               | 215.37<br>(190.77 to 241.91)               | 138.4<br>(122.26 to 155.22)                | -1.64<br>(-1.87 to -1.41)                |
| Serbia       | Thalassemias          | 0<br>(0 to 0)                           | 0<br>(0 to 0)                           | -0.64<br>(-0.68 to -0.59)              | 1.27<br>(0.82 to 2.01)                     | 0.49<br>(0.34 to 0.74)                     | -3.12<br>(-3.37 to -2.86)                |
| Serbia       | Thalassemias trait    | 3<br>(2 to 3)                           | 2<br>(1 to 2)                           | -0.39<br>(-0.43 to -0.35)              | 28.42<br>(23.9 to 34.6)                    | 18.6<br>(15.48 to 22.54)                   | -1.39<br>(-1.66 to -1.13)                |

| Regions      | Causes                | Cases in 1990<br>No.×103<br>(95% UI) | Cases in 2019<br>No.×103<br>(95% UI) | Change in absolute number<br>(%) | Rates in 1990 per 100000<br>(95% UI) | Rates in 2019 per 100000<br>(95% UI) | EAPC from 1990 and 2019<br>(95%CI) |
|--------------|-----------------------|--------------------------------------|--------------------------------------|----------------------------------|--------------------------------------|--------------------------------------|------------------------------------|
| Serbia       | Sickle cell disorders | 0<br>(0 to 0)                        | 0<br>(0 to 0)                        | -0.37<br>(-0.43 to -0.31)        | 0.14<br>(0.11 to 0.19)               | 0.1<br>(0.07 to 0.13)                | -1.39<br>(-1.69 to -1.09)          |
| Serbia       | Sickle cell trait     | 3<br>(2 to 3)                        | 2<br>(1 to 2)                        | -0.4<br>(-0.42 to -0.37)         | 27.56<br>(23.83 to 31.8)             | 17.85<br>(15.14 to 20.64)            | -1.44<br>(-1.71 to -1.17)          |
| Serbia       | G6PD deficiency       | 5<br>(4 to 6)                        | 3<br>(2 to 4)                        | -0.37<br>(-0.41 to -0.32)        | 51.69<br>(40.02 to 64.75)            | 35.14<br>(27.21 to 43.66)            | -2.2<br>(-2.53 to -1.87)           |
| Serbia       | G6PD trait            | 10<br>(9 to 11)                      | 6<br>(5 to 6)                        | -0.42<br>(-0.42 to -0.42)        | 106.28<br>(94.06 to 118.18)          | 66.23<br>(58.5 to 73.73)             | -1.51<br>(-1.76 to -1.25)          |
| Seychelles   | Inherited anemias     | 0<br>(0 to 0)                        | 0<br>(0 to 0)                        | -0.21<br>(-0.23 to -0.19)        | 612.8<br>(546.84 to 682.25)          | 345.62<br>(310.26 to 384.69)         | -1.85<br>(-1.95 to -1.74)          |
| Seychelles   | Thalassemias          | 0<br>(0 to 0)                        | 0<br>(0 to 0)                        | -0.06<br>(-0.2 to 0.07)          | 3.03<br>(2.26 to 4.19)               | 2.03<br>(1.45 to 2.78)               | -1.3<br>(-1.39 to -1.2)            |
| Seychelles   | Thalassemias trait    | 0<br>(0 to 0)                        | 0<br>(0 to 0)                        | -0.03<br>(-0.08 to 0.01)         | 121.77<br>(103.96 to 141.47)         | 84.34<br>(71.93 to 97.89)            | -1.15<br>(-1.23 to -1.07)          |
| Seychelles   | Sickle cell disorders | 0<br>(0 to 0)                        | 0<br>(0 to 0)                        | -0.12<br>(-0.26 to 0.07)         | 0.02<br>(0.01 to 0.02)               | 0.01<br>(0.01 to 0.01)               | -1.48<br>(-1.57 to -1.38)          |
| Seychelles   | Sickle cell trait     | 0<br>(0 to 0)                        | 0<br>(0 to 0)                        | -0.13<br>(-0.2 to -0.04)         | 11.25<br>(9.39 to 13.32)             | 7.03<br>(5.8 to 8.4)                 | -1.49<br>(-1.57 to -1.4)           |
| Seychelles   | G6PD deficiency       | 0<br>(0 to 0)                        | 0<br>(0 to 0)                        | -0.27<br>(-0.28 to -0.25)        | 138.52<br>(106.67 to 174.37)         | 72.57<br>(55.97 to 90.45)            | -2.08<br>(-2.23 to -1.93)          |
| Seychelles   | G6PD trait            | 0<br>(0 to 0)                        | 0<br>(0 to 0)                        | -0.26<br>(-0.28 to -0.23)        | 338.22<br>(305.37 to 367.93)         | 179.64<br>(161.35 to 198.54)         | -2.05<br>(-2.18 to -1.92)          |
| Sierra Leone | Inherited anemias     | 89<br>(82 to 96)                     | 151<br>(139 to 163)                  | 0.7<br>(0.65 to 0.74)            | 2435.17<br>(2250.94 to 2624.74)      | 1820.84<br>(1678.31 to 1962.05)      | -1<br>(-1.17 to -0.82)             |
| Sierra Leone | Thalassemias          | 0<br>(0 to 0)                        | 0<br>(0 to 0)                        | 1.22<br>(0.92 to 1.56)           | 0.38<br>(0.27 to 0.57)               | 0.38<br>(0.26 to 0.53)               | -0.06<br>(-0.23 to 0.11)           |
| Sierra Leone | Thalassemias trait    | 3<br>(3 to 4)                        | 6<br>(5 to 8)                        | 0.9<br>(0.8 to 1)                | 91.25<br>(76.29 to 111.83)           | 76.4<br>(63.78 to 91.17)             | -0.62<br>(-0.79 to -0.44)          |

| <b>Regions</b> | <b>Causes</b>         | <b>Cases in<br/>1990<br/>No.×103<br/>(95% UI)</b> | <b>Cases in<br/>2019<br/>No.×103<br/>(95% UI)</b> | <b>Change in<br/>absolute<br/>number<br/>(%)</b> | <b>Rates in<br/>1990 per<br/>100000<br/>(95% UI)</b> | <b>Rates in<br/>2019 per<br/>100000<br/>(95% UI)</b> | <b>EAPC<br/>from 1990<br/>and 2019<br/>(95%CI)</b> |
|----------------|-----------------------|---------------------------------------------------|---------------------------------------------------|--------------------------------------------------|------------------------------------------------------|------------------------------------------------------|----------------------------------------------------|
| Sierra Leone   | Sickle cell disorders | 4<br>(4 to 5)                                     | 7<br>(6 to 9)                                     | 0.66<br>(0.5 to 0.8)                             | 120.57<br>(99.96 to 147.69)                          | 88<br>(71.64 to 106.62)                              | -1.08<br>(-1.25 to -0.9)                           |
| Sierra Leone   | Sickle cell trait     | 42<br>(39 to 47)                                  | 72<br>(65 to 78)                                  | 0.68<br>(0.61 to 0.75)                           | 1163.42<br>(1065.57 to 1276.13)                      | 863.46<br>(785.13 to 946.56)                         | -1.03<br>(-1.2 to -0.85)                           |
| Sierra Leone   | G6PD deficiency       | 13<br>(10 to 16)                                  | 21<br>(16 to 26)                                  | 0.65<br>(0.6 to 0.72)                            | 345.66<br>(267.3 to 430.92)                          | 251.05<br>(193.65 to 314.88)                         | -1.05<br>(-1.25 to -0.85)                          |
| Sierra Leone   | G6PD trait            | 26<br>(24 to 28)                                  | 45<br>(41 to 49)                                  | 0.72<br>(0.68 to 0.78)                           | 713.88<br>(647.79 to 775.13)                         | 541.55<br>(490.87 to 587.94)                         | -0.96<br>(-1.13 to -0.79)                          |
| Singapore      | Inherited anemias     | 3<br>(3 to 4)                                     | 3<br>(3 to 4)                                     | 0.01<br>(-0.05 to 0.07)                          | 107.75<br>(94.61 to 122.41)                          | 58.58<br>(50.28 to 67.27)                            | -2.13<br>(-2.29 to -1.97)                          |
| Singapore      | Thalassemias          | 0<br>(0 to 0)                                     | 0<br>(0 to 0)                                     | -0.23<br>(-0.35 to -0.08)                        | 0.56<br>(0.39 to 0.83)                               | 0.23<br>(0.17 to 0.33)                               | -3.1<br>(-3.34 to -2.85)                           |
| Singapore      | Thalassemias trait    | 0<br>(0 to 0)                                     | 1<br>(0 to 1)                                     | 0.61<br>(0.45 to 0.78)                           | 11.69<br>(10.03 to 13.48)                            | 10.14<br>(8.46 to 12.01)                             | -0.65<br>(-0.88 to -0.42)                          |
| Singapore      | Sickle cell disorders | 0<br>(0 to 0)                                     | 0<br>(0 to 0)                                     | 0.12<br>(-0.08 to 0.68)                          | 0.01<br>(0.01 to 0.02)                               | 0.01<br>(0.01 to 0.01)                               | -1.47<br>(-1.85 to -1.1)                           |
| Singapore      | Sickle cell trait     | 0<br>(0 to 0)                                     | 0<br>(0 to 0)                                     | 0.1<br>(0.01 to 0.42)                            | 7.6<br>(6.02 to 9.15)                                | 4.49<br>(3.54 to 5.47)                               | -1.68<br>(-1.99 to -1.37)                          |
| Singapore      | G6PD deficiency       | 1<br>(1 to 1)                                     | 1<br>(1 to 1)                                     | -0.09<br>(-0.21 to 0.05)                         | 27.05<br>(22.18 to 32.87)                            | 13.3<br>(10.2 to 16.71)                              | -2.38<br>(-2.76 to -2)                             |
| Singapore      | G6PD trait            | 2<br>(2 to 2)                                     | 2<br>(1 to 2)                                     | -0.07<br>(-0.14 to 0)                            | 60.84<br>(52 to 70.79)                               | 30.42<br>(25.19 to 35.87)                            | -2.44<br>(-2.6 to -2.28)                           |
| Slovakia       | Inherited anemias     | 11<br>(10 to 13)                                  | 8<br>(7 to 9)                                     | -0.28<br>(-0.29 to -0.26)                        | 212.92<br>(188.28 to 240.51)                         | 149.51<br>(131.55 to 168.26)                         | -0.86<br>(-1.25 to -0.48)                          |
| Slovakia       | Thalassemias          | 0<br>(0 to 0)                                     | 0<br>(0 to 0)                                     | -0.56<br>(-0.61 to -0.51)                        | 1.18<br>(0.79 to 1.84)                               | 0.5<br>(0.34 to 0.76)                                | -2.35<br>(-2.75 to -1.95)                          |
| Slovakia       | Thalassemias trait    | 1<br>(1 to 2)                                     | 1<br>(1 to 1)                                     | -0.27<br>(-0.31 to -0.22)                        | 27.85<br>(23.25 to 33.74)                            | 19.8<br>(16.57 to 23.82)                             | -0.61<br>(-1.02 to -0.2)                           |

| Regions         | Causes                | Cases in 1990<br>No.×103<br>(95% UI) | Cases in 2019<br>No.×103<br>(95% UI) | Change in absolute number<br>(%) | Rates in 1990 per 100000<br>(95% UI) | Rates in 2019 per 100000<br>(95% UI) | EAPC from 1990 and 2019<br>(95%CI) |
|-----------------|-----------------------|--------------------------------------|--------------------------------------|----------------------------------|--------------------------------------|--------------------------------------|------------------------------------|
| Slovakia        | Sickle cell disorders | 0<br>(0 to 0)                        | 0<br>(0 to 0)                        | -0.28<br>(-0.34 to -0.22)        | 0.13<br>(0.1 to 0.16)                | 0.09<br>(0.07 to 0.11)               | -0.96<br>(-1.37 to -0.55)          |
| Slovakia        | Sickle cell trait     | 1<br>(1 to 1)                        | 1<br>(1 to 1)                        | -0.28<br>(-0.31 to -0.25)        | 24.43<br>(20.97 to 28.1)             | 17<br>(14.61 to 19.61)               | -0.81<br>(-1.2 to -0.42)           |
| Slovakia        | G6PD deficiency       | 3<br>(2 to 3)                        | 2<br>(2 to 3)                        | -0.23<br>(-0.3 to -0.17)         | 51.49<br>(39.81 to 64.26)            | 38.32<br>(29.6 to 47.69)             | -1.41<br>(-1.86 to -0.95)          |
| Slovakia        | G6PD trait            | 6<br>(5 to 6)                        | 4<br>(4 to 4)                        | -0.3<br>(-0.3 to -0.3)           | 107.84<br>(95.28 to 120.82)          | 73.8<br>(65.21 to 82.69)             | -0.7<br>(-1.1 to -0.3)             |
| Slovenia        | Inherited anemias     | 3<br>(3 to 4)                        | 3<br>(2 to 3)                        | -0.12<br>(-0.13 to -0.1)         | 157.25<br>(138.08 to 177.63)         | 132.23<br>(116.39 to 148.75)         | -0.03<br>(-0.34 to 0.28)           |
| Slovenia        | Thalassemias          | 0<br>(0 to 0)                        | 0<br>(0 to 0)                        | -0.48<br>(-0.55 to -0.4)         | 0.77<br>(0.51 to 1.21)               | 0.38<br>(0.26 to 0.57)               | -1.6<br>(-1.92 to -1.28)           |
| Slovenia        | Thalassemias trait    | 0<br>(0 to 0)                        | 0<br>(0 to 0)                        | -0.1<br>(-0.16 to -0.04)         | 19.04<br>(15.61 to 23.38)            | 16.21<br>(13.56 to 19.39)            | 0.22<br>(-0.09 to 0.52)            |
| Slovenia        | Sickle cell disorders | 0<br>(0 to 0)                        | 0<br>(0 to 0)                        | -0.03<br>(-0.13 to 0.07)         | 0.08<br>(0.06 to 0.1)                | 0.07<br>(0.05 to 0.09)               | 0.38<br>(0.07 to 0.69)             |
| Slovenia        | Sickle cell trait     | 0<br>(0 to 0)                        | 0<br>(0 to 0)                        | -0.09<br>(-0.14 to -0.04)        | 17.61<br>(15.15 to 20.29)            | 15.21<br>(13.07 to 17.5)             | 0.23<br>(-0.08 to 0.54)            |
| Slovenia        | G6PD deficiency       | 1<br>(1 to 1)                        | 1<br>(1 to 1)                        | -0.07<br>(-0.14 to -0.02)        | 39.17<br>(30.04 to 49.12)            | 34.51<br>(26.61 to 42.98)            | -0.63<br>(-1.07 to -0.19)          |
| Slovenia        | G6PD trait            | 2<br>(1 to 2)                        | 1<br>(1 to 2)                        | -0.14<br>(-0.14 to -0.14)        | 80.58<br>(71.37 to 90.62)            | 65.84<br>(58.32 to 74.05)            | 0.12<br>(-0.2 to 0.43)             |
| Solomon Islands | Inherited anemias     | 4<br>(4 to 5)                        | 6<br>(6 to 7)                        | 0.5<br>(0.45 to 0.56)            | 1246.39<br>(1085.28 to 1421.76)      | 972.06<br>(842.39 to 1107.94)        | -0.73<br>(-0.97 to -0.49)          |
| Solomon Islands | Thalassemias          | 0<br>(0 to 0)                        | 0<br>(0 to 0)                        | 0.34<br>(0.14 to 0.56)           | 5.38<br>(2.9 to 7.98)                | 3.75<br>(2.1 to 5.69)                | -0.22<br>(-1.12 to 0.69)           |
| Solomon Islands | Thalassemias trait    | 1<br>(0 to 1)                        | 1<br>(1 to 1)                        | 0.42<br>(0.32 to 0.52)           | 154.73<br>(119.71 to 186.64)         | 114.22<br>(89.46 to 138.81)          | -0.64<br>(-1 to -0.27)             |

| Regions         | Causes                | Cases in 1990<br>No.×103<br>(95% UI) | Cases in 2019<br>No.×103<br>(95% UI) | Change in absolute number<br>(%) | Rates in 1990 per 100000<br>(95% UI) | Rates in 2019 per 100000<br>(95% UI) | EAPC from 1990 and 2019<br>(95%CI) |
|-----------------|-----------------------|--------------------------------------|--------------------------------------|----------------------------------|--------------------------------------|--------------------------------------|------------------------------------|
| Solomon Islands | Sickle cell disorders | 0<br>(0 to 0)                        | 0<br>(0 to 0)                        | 0.53<br>(0.44 to 2.12)           | 0<br>(0 to 0.01)                     | 0<br>(0 to 0.01)                     | -0.66<br>(-0.79 to -0.53)          |
| Solomon Islands | Sickle cell trait     | 0<br>(0 to 0)                        | 0<br>(0 to 0)                        | 0.51<br>(0.44 to 1.84)           | 5.9<br>(2.47 to 8.93)                | 4.61<br>(1.94 to 7.12)               | -0.79<br>(-0.91 to -0.67)          |
| Solomon Islands | G6PD deficiency       | 1<br>(1 to 2)                        | 2<br>(2 to 3)                        | 0.61<br>(0.49 to 0.75)           | 435.76<br>(337.96 to 550.26)         | 364.93<br>(282.1 to 450.53)          | -0.34<br>(-0.79 to 0.11)           |
| Solomon Islands | G6PD trait            | 2<br>(2 to 2)                        | 3<br>(3 to 3)                        | 0.45<br>(0.4 to 0.49)            | 644.62<br>(582.6 to 704.86)          | 484.56<br>(438.12 to 526.09)         | -1.06<br>(-1.21 to -0.92)          |
| Somalia         | Inherited anemias     | 104<br>(92 to 118)                   | 248<br>(218 to 279)                  | 1.37<br>(1.32 to 1.43)           | 1460.54<br>(1281.99 to 1646.07)      | 1217.7<br>(1074.06 to 1371.27)       | -0.66<br>(-0.87 to -0.45)          |
| Somalia         | Thalassemias          | 0<br>(0 to 0)                        | 0<br>(0 to 0)                        | 4.84<br>(4.22 to 6.02)           | 0.1<br>(0.06 to 0.15)                | 0.2<br>(0.11 to 0.3)                 | 2.12<br>(1.88 to 2.37)             |
| Somalia         | Thalassemias trait    | 2<br>(2 to 2)                        | 7<br>(6 to 9)                        | 2.61<br>(2.36 to 2.96)           | 27.57<br>(21.68 to 33.65)            | 34.94<br>(27.69 to 42.54)            | 0.62<br>(0.47 to 0.78)             |
| Somalia         | Sickle cell disorders | 0<br>(0 to 0)                        | 0<br>(0 to 0)                        | 1.64<br>(1.41 to 1.89)           | 0.41<br>(0.27 to 0.62)               | 0.38<br>(0.25 to 0.58)               | -0.34<br>(-0.47 to -0.22)          |
| Somalia         | Sickle cell trait     | 6<br>(5 to 7)                        | 15<br>(12 to 19)                     | 1.62<br>(1.5 to 1.76)            | 80.35<br>(63.1 to 102.09)            | 73.97<br>(58.29 to 94.25)            | -0.36<br>(-0.48 to -0.23)          |
| Somalia         | G6PD deficiency       | 35<br>(27 to 44)                     | 74<br>(57 to 92)                     | 1.11<br>(1.07 to 1.16)           | 489.42<br>(378.49 to 610.64)         | 363.44<br>(281.54 to 451.2)          | -1.06<br>(-1.38 to -0.74)          |
| Somalia         | G6PD trait            | 62<br>(57 to 66)                     | 152<br>(139 to 163)                  | 1.46<br>(1.4 to 1.52)            | 862.69<br>(792.16 to 926.16)         | 744.77<br>(681.67 to 803.17)         | -0.52<br>(-0.69 to -0.36)          |
| South Africa    | Inherited anemias     | 274<br>(266 to 280)                  | 283<br>(276 to 290)                  | 0.03<br>(0.03 to 0.04)           | 743.27<br>(723.26 to 760.41)         | 509.49<br>(496.12 to 521.49)         | -1.11<br>(-1.22 to -1.01)          |
| South Africa    | Thalassemias          | 0<br>(0 to 0)                        | 0<br>(0 to 0)                        | 1.24<br>(0.97 to 1.53)           | 0.06<br>(0.04 to 0.09)               | 0.09<br>(0.05 to 0.13)               | 1.26<br>(1.09 to 1.43)             |
| South Africa    | Thalassemias trait    | 8<br>(6 to 9)                        | 10<br>(8 to 12)                      | 0.37<br>(0.28 to 0.45)           | 20.5<br>(17.35 to 23.99)             | 18.63<br>(15.26 to 21.99)            | -0.26<br>(-0.35 to -0.18)          |

| Regions      | Causes                | Cases in<br>1990<br>No.×103<br>(95% UI) | Cases in<br>2019<br>No.×103<br>(95% UI) | Change in<br>absolute<br>number<br>(%) | Rates in<br>1990 per<br>100000<br>(95% UI) | Rates in<br>2019 per<br>100000<br>(95% UI) | EAPC<br>from 1990<br>and 2019<br>(95%CI) |
|--------------|-----------------------|-----------------------------------------|-----------------------------------------|----------------------------------------|--------------------------------------------|--------------------------------------------|------------------------------------------|
| South Africa | Sickle cell disorders | 0<br>(0 to 0)                           | 0<br>(0 to 0)                           | 0.06<br>(0.02 to 0.1)                  | 0.08<br>(0.06 to 0.12)                     | 0.06<br>(0.04 to 0.09)                     | -1.08<br>(-1.14 to -1.02)                |
| South Africa | Sickle cell trait     | 9<br>(7 to 12)                          | 10<br>(8 to 13)                         | 0.07<br>(0.05 to 0.1)                  | 25.15<br>(19.58 to 32.37)                  | 17.86<br>(13.85 to 22.87)                  | -1.04<br>(-1.11 to -0.98)                |
| South Africa | G6PD deficiency       | 86<br>(83 to 90)                        | 86<br>(82 to 89)                        | -0.01<br>(-0.02 to 0)                  | 234.76<br>(224.11 to 244.17)               | 153.91<br>(146.83 to 160.4)                | -1.27<br>(-1.41 to -1.13)                |
| South Africa | G6PD trait            | 170<br>(168 to 173)                     | 177<br>(174 to 180)                     | 0.04<br>(0.03 to 0.05)                 | 462.72<br>(455.13 to 469.62)               | 318.94<br>(313.59 to 323.69)               | -1.08<br>(-1.17 to -0.99)                |
| South Sudan  | Inherited anemias     | 85<br>(75 to 96)                        | 112<br>(100 to 125)                     | 0.32<br>(0.29 to 0.36)                 | 1450.82<br>(1281.55 to 1630.98)            | 1208.88<br>(1075.05 to 1350.27)            | -0.63<br>(-0.87 to -0.38)                |
| South Sudan  | Thalassemias          | 0<br>(0 to 0)                           | 0<br>(0 to 0)                           | 2.24<br>(1.88 to 2.9)                  | 0.09<br>(0.05 to 0.13)                     | 0.18<br>(0.1 to 0.28)                      | 2.17<br>(1.91 to 2.42)                   |
| South Sudan  | Thalassemias trait    | 1<br>(1 to 2)                           | 3<br>(2 to 4)                           | 1<br>(0.87 to 1.19)                    | 25.29<br>(20.08 to 30.72)                  | 31.97<br>(25.31 to 39.14)                  | 0.65<br>(0.48 to 0.83)                   |
| South Sudan  | Sickle cell disorders | 0<br>(0 to 0)                           | 0<br>(0 to 0)                           | 0.36<br>(0.22 to 0.54)                 | 2.01<br>(1.4 to 2.74)                      | 1.72<br>(1.23 to 2.4)                      | -0.52<br>(-0.66 to -0.38)                |
| South Sudan  | Sickle cell trait     | 10<br>(9 to 12)                         | 15<br>(12 to 17)                        | 0.4<br>(0.33 to 0.49)                  | 177.46<br>(148.21 to 207.68)               | 156.73<br>(132.77 to 185.72)               | -0.43<br>(-0.58 to -0.29)                |
| South Sudan  | G6PD deficiency       | 26<br>(20 to 33)                        | 31<br>(24 to 39)                        | 0.18<br>(0.12 to 0.24)                 | 446.21<br>(342.81 to 560.36)               | 331.28<br>(256.5 to 417.37)                | -1.03<br>(-1.4 to -0.66)                 |
| South Sudan  | G6PD trait            | 47<br>(43 to 51)                        | 64<br>(58 to 69)                        | 0.36<br>(0.32 to 0.42)                 | 799.76<br>(732.43 to 862.15)               | 686.99<br>(627.78 to 742.85)               | -0.51<br>(-0.71 to -0.31)                |
| Spain        | Inherited anemias     | 47<br>(42 to 52)                        | 42<br>(37 to 46)                        | -0.11<br>(-0.14 to -0.08)              | 121.19<br>(109.05 to 133.84)               | 90.68<br>(81.22 to 100.63)                 | -0.42<br>(-0.76 to -0.07)                |
| Spain        | Thalassemias          | 0<br>(0 to 0)                           | 0<br>(0 to 0)                           | -0.15<br>(-0.31 to -0.02)              | 0.1<br>(0.07 to 0.15)                      | 0.07<br>(0.05 to 0.11)                     | -1.73<br>(-2.81 to -0.64)                |
| Spain        | Thalassemias trait    | 3<br>(3 to 4)                           | 3<br>(2 to 4)                           | -0.05<br>(-0.13 to 0.03)               | 8.17<br>(6.57 to 9.84)                     | 6.56<br>(5.34 to 7.86)                     | -0.72<br>(-1.28 to -0.15)                |

| Regions   | Causes                | Cases in 1990<br>No.×103<br>(95% UI) | Cases in 2019<br>No.×103<br>(95% UI) | Change in absolute number<br>(%) | Rates in 1990 per 100000<br>(95% UI) | Rates in 2019 per 100000<br>(95% UI) | EAPC from 1990 and 2019<br>(95%CI) |
|-----------|-----------------------|--------------------------------------|--------------------------------------|----------------------------------|--------------------------------------|--------------------------------------|------------------------------------|
| Spain     | Sickle cell disorders | 0<br>(0 to 0)                        | 0<br>(0 to 0)                        | -0.34<br>(-0.42 to -0.25)        | 0.22<br>(0.15 to 0.3)                | 0.12<br>(0.09 to 0.16)               | -0.6<br>(-1.12 to -0.08)           |
| Spain     | Sickle cell trait     | 10<br>(8 to 12)                      | 7<br>(6 to 9)                        | -0.26<br>(-0.31 to -0.2)         | 25.64<br>(20.65 to 31.04)            | 15.94<br>(13.05 to 19.27)            | -0.48<br>(-0.91 to -0.04)          |
| Spain     | G6PD deficiency       | 4<br>(3 to 5)                        | 4<br>(3 to 5)                        | -0.01<br>(-0.09 to 0.06)         | 10.58<br>(8.15 to 13.24)             | 8.82<br>(6.76 to 11.11)              | -0.15<br>(-0.46 to 0.17)           |
| Spain     | G6PD trait            | 30<br>(26 to 33)                     | 27<br>(24 to 31)                     | -0.08<br>(-0.12 to -0.04)        | 76.48<br>(68.05 to 85.31)            | 59.17<br>(52.5 to 66.32)             | -0.4<br>(-0.74 to -0.06)           |
| Sri Lanka | Inherited anemias     | 104<br>(90 to 119)                   | 79<br>(68 to 90)                     | -0.24<br>(-0.26 to -0.23)        | 603.63<br>(522.64 to 692.85)         | 359.31<br>(310.94 to 413.1)          | -1.48<br>(-1.77 to -1.18)          |
| Sri Lanka | Thalassemias          | 0<br>(0 to 0)                        | 0<br>(0 to 0)                        | -0.37<br>(-0.45 to -0.28)        | 1.53<br>(1.08 to 2.27)               | 0.76<br>(0.57 to 1.05)               | -2.07<br>(-2.27 to -1.87)          |
| Sri Lanka | Thalassemias trait    | 10<br>(9 to 11)                      | 9<br>(8 to 10)                       | -0.11<br>(-0.15 to -0.08)        | 58.36<br>(51.39 to 66.56)            | 40.7<br>(36 to 45.86)                | -0.92<br>(-1.14 to -0.71)          |
| Sri Lanka | Sickle cell disorders | 0<br>(0 to 0)                        | 0<br>(0 to 0)                        | -0.17<br>(-0.36 to 0.06)         | 0.01<br>(0.01 to 0.02)               | 0.01<br>(0.01 to 0.01)               | -1.16<br>(-1.36 to -0.95)          |
| Sri Lanka | Sickle cell trait     | 2<br>(1 to 2)                        | 1<br>(1 to 2)                        | -0.17<br>(-0.27 to -0.06)        | 9.92<br>(8.27 to 11.81)              | 6.47<br>(5.33 to 7.77)               | -1.17<br>(-1.38 to -0.95)          |
| Sri Lanka | G6PD deficiency       | 40<br>(31 to 51)                     | 32<br>(25 to 40)                     | -0.21<br>(-0.22 to -0.2)         | 233.19<br>(180.32 to 293.39)         | 145.34<br>(112.33 to 183.03)         | -1.3<br>(-1.55 to -1.05)           |
| Sri Lanka | G6PD trait            | 52<br>(47 to 56)                     | 36<br>(33 to 40)                     | -0.3<br>(-0.32 to -0.28)         | 300.62<br>(270.91 to 327.74)         | 166.03<br>(149.07 to 181.79)         | -1.75<br>(-2.11 to -1.39)          |
| Sudan     | Inherited anemias     | 348<br>(325 to 375)                  | 402<br>(375 to 432)                  | 0.15<br>(0.13 to 0.18)           | 1724.65<br>(1607.14 to 1856.54)      | 985.55<br>(919.32 to 1059.48)        | -2.22<br>(-2.45 to -2)             |
| Sudan     | Thalassemias          | 1<br>(1 to 2)                        | 1<br>(1 to 2)                        | 0.17<br>(0.06 to 0.29)           | 5.74<br>(4.44 to 7.54)               | 3.33<br>(2.6 to 4.3)                 | -1.92<br>(-2.06 to -1.78)          |
| Sudan     | Thalassemias trait    | 72<br>(64 to 82)                     | 85<br>(76 to 97)                     | 0.18<br>(0.13 to 0.24)           | 357.55<br>(317.75 to 405.22)         | 209.48<br>(187.19 to 236.89)         | -1.9<br>(-2.04 to -1.76)           |

| Regions  | Causes                | Cases in 1990<br>No.×103<br>(95% UI) | Cases in 2019<br>No.×103<br>(95% UI) | Change in absolute number<br>(%) | Rates in 1990 per 100000<br>(95% UI) | Rates in 2019 per 100000<br>(95% UI) | EAPC from 1990 and 2019<br>(95%CI) |
|----------|-----------------------|--------------------------------------|--------------------------------------|----------------------------------|--------------------------------------|--------------------------------------|------------------------------------|
| Sudan    | Sickle cell disorders | 5<br>(4 to 6)                        | 5<br>(4 to 7)                        | 0.12<br>(0.02 to 0.22)           | 23.41<br>(18.58 to 29.52)            | 12.99<br>(10.31 to 16.31)            | -2.36<br>(-3.07 to -1.65)          |
| Sudan    | Sickle cell trait     | 131<br>(118 to 146)                  | 149<br>(134 to 166)                  | 0.13<br>(0.08 to 0.18)           | 649.74<br>(584.81 to 724.9)          | 364.15<br>(327.18 to 405.76)         | -2.17<br>(-2.56 to -1.77)          |
| Sudan    | G6PD deficiency       | 24<br>(18 to 29)                     | 27<br>(21 to 34)                     | 0.16<br>(0.08 to 0.23)           | 116.45<br>(90.55 to 145.15)          | 66.62<br>(51.18 to 83.32)            | -2.81<br>(-3.06 to -2.57)          |
| Sudan    | G6PD trait            | 115<br>(103 to 127)                  | 134<br>(120 to 148)                  | 0.16<br>(0.12 to 0.21)           | 571.77<br>(511.41 to 628.3)          | 328.98<br>(294.41 to 363.72)         | -2.41<br>(-2.56 to -2.26)          |
| Suriname | Inherited anemias     | 3<br>(2 to 3)                        | 3<br>(2 to 3)                        | -0.04<br>(-0.08 to -0.01)        | 703.6<br>(616.02 to 797.19)          | 451.11<br>(396.38 to 507.81)         | -1.39<br>(-1.49 to -1.29)          |
| Suriname | Thalassemias          | 0<br>(0 to 0)                        | 0<br>(0 to 0)                        | 0.57<br>(-0.05 to 2.05)          | 0.01<br>(0.01 to 0.02)               | 0.01<br>(0.01 to 0.02)               | 0.25<br>(-0.04 to 0.54)            |
| Suriname | Thalassemias trait    | 0<br>(0 to 0)                        | 0<br>(0 to 0)                        | 0.13<br>(-0.05 to 0.43)          | 9.42<br>(7.19 to 11.9)               | 7.13<br>(5.53 to 8.56)               | -0.86<br>(-0.99 to -0.72)          |
| Suriname | Sickle cell disorders | 0<br>(0 to 0)                        | 0<br>(0 to 0)                        | 0.11<br>(-0.02 to 0.28)          | 8.27<br>(6.05 to 10.99)              | 6.17<br>(4.35 to 8.46)               | -0.99<br>(-1.22 to -0.76)          |
| Suriname | Sickle cell trait     | 1<br>(1 to 1)                        | 1<br>(1 to 1)                        | 0.02<br>(-0.06 to 0.1)           | 223.76<br>(187.98 to 265.83)         | 152.96<br>(125.08 to 182.44)         | -1.2<br>(-1.35 to -1.06)           |
| Suriname | G6PD deficiency       | 1<br>(1 to 1)                        | 1<br>(1 to 1)                        | -0.13<br>(-0.21 to -0.06)        | 223.25<br>(172.67 to 279.18)         | 131.13<br>(100.99 to 161.89)         | -1.62<br>(-1.77 to -1.47)          |
| Suriname | G6PD trait            | 1<br>(1 to 1)                        | 1<br>(1 to 1)                        | -0.04<br>(-0.07 to -0.01)        | 238.88<br>(213.25 to 264.87)         | 153.71<br>(136.79 to 171.3)          | -1.4<br>(-1.5 to -1.3)             |
| Sweden   | Inherited anemias     | 22<br>(21 to 23)                     | 21<br>(21 to 22)                     | -0.03<br>(-0.04 to -0.01)        | 256.43<br>(248.35 to 264.81)         | 209.14<br>(201.94 to 216.96)         | -0.2<br>(-0.54 to 0.15)            |
| Sweden   | Thalassemias          | 0<br>(0 to 0)                        | 0<br>(0 to 0)                        | -0.13<br>(-0.22 to -0.04)        | 0.19<br>(0.13 to 0.26)               | 0.14<br>(0.1 to 0.19)                | -1.43<br>(-2.14 to -0.72)          |
| Sweden   | Thalassemias trait    | 2<br>(2 to 2)                        | 2<br>(2 to 2)                        | -0.05<br>(-0.1 to 0)             | 23.26<br>(20.08 to 26.56)            | 18.54<br>(16.11 to 21.17)            | -0.46<br>(-0.77 to -0.16)          |



| Regions                 | Causes                      | Cases in<br>1990<br>No.×103<br>(95% UI) | Cases in<br>2019<br>No.×103<br>(95% UI) | Change in<br>absolute<br>number<br>(%) | Rates in<br>1990 per<br>100000<br>(95% UI) | Rates in<br>2019 per<br>100000<br>(95% UI) | EAPC<br>from 1990<br>and 2019<br>(95%CI) |
|-------------------------|-----------------------------|-----------------------------------------|-----------------------------------------|----------------------------------------|--------------------------------------------|--------------------------------------------|------------------------------------------|
| Sweden                  | Sickle<br>cell<br>disorders | 0<br>(0 to 0)                           | 0<br>(0 to 0)                           | 0.5<br>(0.36 to<br>0.68)               | 0.21<br>(0.15 to<br>0.3)                   | 0.27<br>(0.19 to<br>0.38)                  | 1.1<br>(0.73 to<br>1.46)                 |
| Sweden                  | Sickle<br>cell trait        | 3<br>(2 to 3)                           | 3<br>(3 to 4)                           | 0.2<br>(0.14 to<br>0.28)               | 32.17<br>(26.6 to<br>39.01)                | 32.52<br>(26.91 to<br>38.78)               | 0.46<br>(0.11 to<br>0.8)                 |
| Sweden                  | G6PD<br>deficiency          | 3<br>(3 to 3)                           | 3<br>(3 to 3)                           | -0.01<br>(-0.03 to<br>0.01)            | 37.84<br>(36.08 to<br>39.51)               | 31.43<br>(29.98 to<br>32.75)               | -0.13<br>(-0.5 to<br>0.25)               |
| Sweden                  | G6PD trait                  | 14<br>(14 to 14)                        | 13<br>(13 to 13)                        | -0.08<br>(-0.09 to<br>-0.06)           | 162.76<br>(159.36 to<br>166.02)            | 126.23<br>(123.7 to<br>128.68)             | -0.32<br>(-0.68 to<br>0.04)              |
| Switzerland             | Inherited<br>anemias        | 15<br>(14 to 17)                        | 16<br>(14 to 17)                        | 0.02<br>(0 to 0.05)                    | 223.22<br>(200.84 to<br>248.11)            | 178.8<br>(160.04 to<br>198.01)             | -0.78<br>(-0.99 to<br>-0.57)             |
| Switzerland             | Thalassemi<br>as            | 0<br>(0 to 0)                           | 0<br>(0 to 0)                           | -0.04<br>(-0.17 to<br>0.09)            | 0.16<br>(0.1 to<br>0.21)                   | 0.12<br>(0.08 to<br>0.17)                  | -1.84<br>(-2.48 to<br>-1.2)              |
| Switzerland             | Thalassemi<br>as trait      | 1<br>(1 to 2)                           | 1<br>(1 to 2)                           | 0.04<br>(-0.02 to<br>0.11)             | 19.72<br>(17.09 to<br>22.38)               | 16.1<br>(13.96 to<br>18.51)                | -0.91<br>(-1.09 to<br>-0.74)             |
| Switzerland             | Sickle<br>cell<br>disorders | 0<br>(0 to 0)                           | 0<br>(0 to 0)                           | 0.17<br>(0.05 to<br>0.28)              | 0.31<br>(0.23 to<br>0.4)                   | 0.28<br>(0.21 to<br>0.36)                  | -0.4<br>(-0.64 to<br>-0.16)              |
| Switzerland             | Sickle<br>cell trait        | 2<br>(1 to 2)                           | 2<br>(1 to 2)                           | 0.02<br>(-0.04 to<br>0.08)             | 24.65<br>(20.07 to<br>29.64)               | 19.65<br>(16.1 to<br>23.69)                | -0.79<br>(-1 to<br>-0.57)                |
| Switzerland             | G6PD<br>deficiency          | 2<br>(2 to 3)                           | 3<br>(2 to 3)                           | 0.08<br>(0.03 to<br>0.15)              | 34.6<br>(26.67 to<br>43.37)                | 29.22<br>(22.48 to<br>36.46)               | -0.61<br>(-0.87 to<br>-0.35)             |
| Switzerland             | G6PD trait                  | 10<br>(9 to 11)                         | 10<br>(9 to 11)                         | 0.01<br>(-0.02 to<br>0.04)             | 143.78<br>(128.77 to<br>158.87)            | 113.43<br>(101.59 to<br>125.33)            | -0.8<br>(-1.02 to<br>-0.59)              |
| Syrian Arab<br>Republic | Inherited<br>anemias        | 157<br>(144 to<br>171)                  | 72<br>(66 to 78)                        | -0.54<br>(-0.55 to<br>-0.53)           | 1221.06<br>(1118.79 to<br>1327.49)         | 496<br>(455.34 to<br>537.4)                | -3.09<br>(-3.32 to<br>-2.86)             |
| Syrian Arab<br>Republic | Thalassemi<br>as            | 1<br>(0 to 1)                           | 0<br>(0 to 0)                           | -0.53<br>(-0.58 to<br>-0.49)           | 4.75<br>(3.67 to<br>6.19)                  | 1.97<br>(1.54 to<br>2.55)                  | -3.09<br>(-3.32 to<br>-2.86)             |
| Syrian Arab<br>Republic | Thalassemi<br>as trait      | 36<br>(32 to 41)                        | 17<br>(15 to 19)                        | -0.53<br>(-0.55 to<br>-0.51)           | 280.27<br>(249.61 to<br>316.96)            | 116.39<br>(103.71 to<br>130.99)            | -3.07<br>(-3.3 to<br>-2.84)              |

| <b>Regions</b>                | <b>Causes</b>         | <b>Cases in<br/>1990<br/>No.×103<br/>(95% UI)</b> | <b>Cases in<br/>2019<br/>No.×103<br/>(95% UI)</b> | <b>Change in<br/>absolute<br/>number<br/>(%)</b> | <b>Rates in<br/>1990 per<br/>100000<br/>(95% UI)</b> | <b>Rates in<br/>2019 per<br/>100000<br/>(95% UI)</b> | <b>EAPC<br/>from 1990<br/>and 2019<br/>(95%CI)</b> |
|-------------------------------|-----------------------|---------------------------------------------------|---------------------------------------------------|--------------------------------------------------|------------------------------------------------------|------------------------------------------------------|----------------------------------------------------|
| Syrian Arab Republic          | Sickle cell disorders | 0<br>(0 to 0)                                     | 0<br>(0 to 0)                                     | -0.54<br>(-0.57 to -0.51)                        | 1.36<br>(1.09 to 1.65)                               | 0.55<br>(0.45 to 0.67)                               | -3.15<br>(-3.37 to -2.94)                          |
| Syrian Arab Republic          | Sickle cell trait     | 18<br>(16 to 20)                                  | 8<br>(7 to 9)                                     | -0.55<br>(-0.56 to -0.53)                        | 141.86<br>(126.81 to 156.43)                         | 57.08<br>(51.29 to 63.1)                             | -3.16<br>(-3.39 to -2.94)                          |
| Syrian Arab Republic          | G6PD deficiency       | 21<br>(16 to 26)                                  | 9<br>(7 to 12)                                    | -0.55<br>(-0.57 to -0.53)                        | 159.44<br>(122.6 to 200.2)                           | 64.14<br>(49.44 to 79.83)                            | -2.87<br>(-3.13 to -2.6)                           |
| Syrian Arab Republic          | G6PD trait            | 82<br>(74 to 89)                                  | 37<br>(34 to 40)                                  | -0.55<br>(-0.56 to -0.53)                        | 633.39<br>(574.63 to 690.69)                         | 255.88<br>(232.42 to 277.01)                         | -3.13<br>(-3.35 to -2.92)                          |
| Taiwan<br>(Province of China) | Inherited anemias     | 55<br>(50 to 60)                                  | 29<br>(26 to 33)                                  | -0.47<br>(-0.5 to -0.44)                         | 269.44<br>(246.88 to 294.44)                         | 123.06<br>(109.61 to 137.75)                         | -2.74<br>(-3.12 to -2.37)                          |
| Taiwan<br>(Province of China) | Thalassemias          | 0<br>(0 to 0)                                     | 0<br>(0 to 0)                                     | -0.62<br>(-0.66 to -0.58)                        | 0.64<br>(0.5 to 0.85)                                | 0.21<br>(0.17 to 0.26)                               | -3.88<br>(-4.29 to -3.46)                          |
| Taiwan<br>(Province of China) | Thalassemias trait    | 8<br>(7 to 9)                                     | 4<br>(4 to 5)                                     | -0.46<br>(-0.5 to -0.41)                         | 37.55<br>(32.87 to 43.07)                            | 17.63<br>(15.9 to 19.49)                             | -2.64<br>(-3.06 to -2.23)                          |
| Taiwan<br>(Province of China) | Sickle cell disorders | 0<br>(0 to 0)                                     | 0<br>(0 to 0)                                     | -0.17<br>(-0.3 to -0.01)                         | 0.04<br>(0.03 to 0.05)                               | 0.03<br>(0.02 to 0.03)                               | -0.8<br>(-1.47 to -0.12)                           |
| Taiwan<br>(Province of China) | Sickle cell trait     | 3<br>(3 to 3)                                     | 2<br>(2 to 2)                                     | -0.35<br>(-0.39 to -0.28)                        | 14.39<br>(12.35 to 16.89)                            | 8.13<br>(7.1 to 9.25)                                | -1.84<br>(-2.35 to -1.32)                          |
| Taiwan<br>(Province of China) | G6PD deficiency       | 10<br>(9 to 12)                                   | 5<br>(4 to 7)                                     | -0.48<br>(-0.56 to -0.39)                        | 51.13<br>(44.49 to 58.33)                            | 22.95<br>(17.68 to 28.72)                            | -2.85<br>(-3.29 to -2.41)                          |
| Taiwan<br>(Province of China) | G6PD trait            | 34<br>(30 to 37)                                  | 18<br>(16 to 19)                                  | -0.48<br>(-0.51 to -0.45)                        | 165.71<br>(149.06 to 183.03)                         | 74.12<br>(66.07 to 82.44)                            | -2.82<br>(-3.16 to -2.48)                          |
| Tajikistan                    | Inherited anemias     | 34<br>(31 to 37)                                  | 42<br>(38 to 46)                                  | 0.24<br>(0.21 to 0.26)                           | 624.59<br>(567.65 to 684.56)                         | 437.42<br>(398 to 479.79)                            | -0.85<br>(-1.08 to -0.62)                          |
| Tajikistan                    | Thalassemias          | 0<br>(0 to 0)                                     | 0<br>(0 to 0)                                     | 0.05<br>(-0.06 to 0.18)                          | 6.26<br>(4.84 to 8.11)                               | 3.73<br>(2.92 to 4.78)                               | -1.39<br>(-1.63 to -1.16)                          |
| Tajikistan                    | Thalassemias trait    | 13<br>(12 to 15)                                  | 17<br>(15 to 19)                                  | 0.26<br>(0.2 to 0.32)                            | 246.68<br>(217.58 to 278.04)                         | 176.18<br>(156.47 to 200.38)                         | -0.8<br>(-1.03 to -0.57)                           |

| Regions     | Causes                | Cases in 1990<br>No.×103<br>(95% UI) | Cases in 2019<br>No.×103<br>(95% UI) | Change in absolute number<br>(%) | Rates in 1990 per 100000<br>(95% UI) | Rates in 2019 per 100000<br>(95% UI) | EAPC from 1990 and 2019<br>(95%CI) |
|-------------|-----------------------|--------------------------------------|--------------------------------------|----------------------------------|--------------------------------------|--------------------------------------|------------------------------------|
| Tajikistan  | Sickle cell disorders | 0<br>(0 to 0)                        | 0<br>(0 to 0)                        | 0.23<br>(0.15 to 0.42)           | 0.02<br>(0.02 to 0.04)               | 0.02<br>(0.01 to 0.03)               | -0.87<br>(-1.11 to -0.64)          |
| Tajikistan  | Sickle cell trait     | 1<br>(1 to 1)                        | 1<br>(1 to 2)                        | 0.23<br>(0.22 to 0.33)           | 18.3<br>(14.29 to 22.7)              | 12.74<br>(9.91 to 15.84)             | -0.88<br>(-1.11 to -0.65)          |
| Tajikistan  | G6PD deficiency       | 3<br>(2 to 4)                        | 4<br>(3 to 5)                        | 0.25<br>(0.19 to 0.33)           | 53.61<br>(41.13 to 66.76)            | 37.91<br>(29.36 to 48.29)            | -0.76<br>(-0.98 to -0.54)          |
| Tajikistan  | G6PD trait            | 16<br>(14 to 18)                     | 20<br>(17 to 22)                     | 0.22<br>(0.22 to 0.22)           | 299.72<br>(266.93 to 332.69)         | 206.84<br>(184.21 to 229.59)         | -0.9<br>(-1.13 to -0.67)           |
| Thailand    | Inherited anemias     | 307<br>(291 to 324)                  | 178<br>(163 to 195)                  | -0.42<br>(-0.45 to -0.39)        | 540.17<br>(510.97 to 568.92)         | 253.95<br>(232.07 to 278.11)         | -2.51<br>(-2.59 to -2.42)          |
| Thailand    | Thalassemias          | 17<br>(14 to 22)                     | 8<br>(7 to 9)                        | -0.53<br>(-0.6 to -0.47)         | 29.28<br>(23.89 to 37.95)            | 11.08<br>(9.29 to 13.47)             | -3.25<br>(-3.32 to -3.18)          |
| Thailand    | Thalassemias trait    | 114<br>(105 to 124)                  | 72<br>(66 to 79)                     | -0.36<br>(-0.39 to -0.34)        | 200.02<br>(183.79 to 218.84)         | 103.13<br>(94.43 to 112.91)          | -2.2<br>(-2.27 to -2.12)           |
| Thailand    | Sickle cell disorders | 0<br>(0 to 0)                        | 0<br>(0 to 0)                        | -0.46<br>(-0.58 to -0.39)        | 0.01<br>(0.01 to 0.02)               | 0.01<br>(0 to 0.01)                  | -2.72<br>(-2.79 to -2.65)          |
| Thailand    | Sickle cell trait     | 5<br>(4 to 6)                        | 3<br>(2 to 4)                        | -0.45<br>(-0.51 to -0.41)        | 9.3<br>(7.58 to 11.36)               | 4.12<br>(3.37 to 4.99)               | -2.7<br>(-2.77 to -2.63)           |
| Thailand    | G6PD deficiency       | 54<br>(50 to 59)                     | 33<br>(25 to 41)                     | -0.4<br>(-0.52 to -0.28)         | 95.71<br>(87.83 to 103.71)           | 46.64<br>(36.06 to 58.4)             | -2.23<br>(-2.44 to -2.03)          |
| Thailand    | G6PD trait            | 117<br>(109 to 125)                  | 62<br>(56 to 68)                     | -0.47<br>(-0.51 to -0.43)        | 205.84<br>(190.79 to 220.26)         | 88.98<br>(79.74 to 97.4)             | -2.87<br>(-2.93 to -2.81)          |
| Timor-Leste | Inherited anemias     | 11<br>(10 to 12)                     | 10<br>(9 to 11)                      | -0.07<br>(-0.09 to -0.04)        | 1380.62<br>(1232.49 to 1529.03)      | 755.06<br>(678.46 to 835.57)         | -2.37<br>(-2.51 to -2.23)          |
| Timor-Leste | Thalassemias          | 0<br>(0 to 0)                        | 0<br>(0 to 0)                        | 0.06<br>(-0.08 to 0.2)           | 11.17<br>(8.42 to 15.2)              | 6.92<br>(5.1 to 9.05)                | -1.96<br>(-2.07 to -1.85)          |
| Timor-Leste | Thalassemias trait    | 3<br>(2 to 3)                        | 3<br>(3 to 4)                        | 0.11<br>(0.05 to 0.16)           | 352.55<br>(301.66 to 408)            | 229.47<br>(197.2 to 265.79)          | -1.79<br>(-1.89 to -1.68)          |

| Regions     | Causes                      | Cases in<br>1990<br>No.×103<br>(95% UI) | Cases in<br>2019<br>No.×103<br>(95% UI) | Change in<br>absolute<br>number<br>(%) | Rates in<br>1990 per<br>100000<br>(95% UI) | Rates in<br>2019 per<br>100000<br>(95% UI) | EAPC<br>from 1990<br>and 2019<br>(95%CI) |
|-------------|-----------------------------|-----------------------------------------|-----------------------------------------|----------------------------------------|--------------------------------------------|--------------------------------------------|------------------------------------------|
| Timor-Leste | Sickle<br>cell<br>disorders | 0<br>(0 to 0)                           | 0<br>(0 to 0)                           | 0.01<br>(−0.21 to<br>0.16)             | 0.04<br>(0.03 to<br>0.06)                  | 0.03<br>(0.02 to<br>0.04)                  | −2.05<br>(−2.14 to<br>−1.97)             |
| Timor-Leste | Sickle<br>cell trait        | 0<br>(0 to 0)                           | 0<br>(0 to 0)                           | 0.02<br>(−0.09 to<br>0.09)             | 27.26<br>(22.54 to<br>32.42)               | 16.24<br>(13.33 to<br>19.32)               | −2.05<br>(−2.14 to<br>−1.96)             |
| Timor-Leste | G6PD<br>deficiency          | 2<br>(2 to 3)                           | 2<br>(1 to 2)                           | −0.15<br>(−0.21 to<br>−0.08)           | 288.53<br>(223.36 to<br>358.18)            | 144.48<br>(111.7 to<br>180.19)             | −2.65<br>(−2.84 to<br>−2.46)             |
| Timor-Leste | G6PD trait                  | 5<br>(5 to 6)                           | 5<br>(4 to 5)                           | −0.13<br>(−0.16 to<br>−0.09)           | 701.07<br>(634.82 to<br>762.43)            | 357.91<br>(321.49 to<br>395.6)             | −2.6<br>(−2.78 to<br>−2.42)              |
| Togo        | Inherited<br>anemias        | 76<br>(70 to 83)                        | 110<br>(101 to<br>119)                  | 0.44<br>(0.4 to<br>0.48)               | 2081.8<br>(1921.66 to<br>2261.14)          | 1386.94<br>(1272.93 to<br>1507.7)          | −1.18<br>(−1.35 to<br>−1.01)             |
| Togo        | Thalassemi<br>as            | 0<br>(0 to 0)                           | 0<br>(0 to 0)                           | 1.01<br>(0.63 to<br>1.52)              | 0.27<br>(0.14 to<br>0.53)                  | 0.25<br>(0.14 to<br>0.42)                  | 0.05<br>(−0.14 to<br>0.24)               |
| Togo        | Thalassemi<br>as trait      | 3<br>(2 to 4)                           | 4<br>(3 to 6)                           | 0.64<br>(0.54 to<br>0.77)              | 73.55<br>(50.96 to<br>106.74)              | 55.93<br>(39.78 to<br>77.32)               | −0.69<br>(−0.86 to<br>−0.51)             |
| Togo        | Sickle<br>cell<br>disorders | 3<br>(3 to 4)                           | 5<br>(4 to 6)                           | 0.44<br>(0.31 to<br>0.57)              | 91.04<br>(80.1 to<br>105.35)               | 60.54<br>(51.14 to<br>70.69)               | −1.16<br>(−1.35 to<br>−0.97)             |
| Togo        | Sickle<br>cell trait        | 32<br>(29 to 35)                        | 45<br>(41 to 49)                        | 0.42<br>(0.34 to<br>0.5)               | 869.08<br>(803.64 to<br>943.45)            | 569.74<br>(512.65 to<br>621.71)            | −1.22<br>(−1.39 to<br>−1.06)             |
| Togo        | G6PD<br>deficiency          | 13<br>(10 to 16)                        | 18<br>(14 to 22)                        | 0.41<br>(0.33 to<br>0.48)              | 342.64<br>(265.06 to<br>429)               | 222.66<br>(172.08 to<br>281)               | −1.23<br>(−1.43 to<br>−1.03)             |
| Togo        | G6PD trait                  | 26<br>(24 to 28)                        | 38<br>(34 to 41)                        | 0.47<br>(0.44 to<br>0.5)               | 705.23<br>(641.81 to<br>766.02)            | 477.82<br>(433.77 to<br>521.36)            | −1.15<br>(−1.32 to<br>−0.98)             |
| Tokelau     | Inherited<br>anemias        | 0<br>(0 to 0)                           | 0<br>(0 to 0)                           | −0.34<br>(−0.35 to<br>−0.33)           | 791.83<br>(704.15 to<br>884.8)             | 628.71<br>(558.08 to<br>701.1)             | −0.83<br>(−1.05 to<br>−0.61)             |
| Tokelau     | Thalassemi<br>as            | 0<br>(0 to 0)                           | 0<br>(0 to 0)                           | −0.46<br>(−0.53 to<br>−0.38)           | 4.13<br>(2.25 to<br>6.42)                  | 2.65<br>(1.44 to<br>4.05)                  | −0.47<br>(−1.45 to<br>0.52)              |
| Tokelau     | Thalassemi<br>as trait      | 0<br>(0 to 0)                           | 0<br>(0 to 0)                           | −0.42<br>(−0.45 to<br>−0.38)           | 125.87<br>(97.9 to<br>153.71)              | 87.04<br>(66.79 to<br>106.27)              | −0.89<br>(−1.32 to<br>−0.45)             |

| <b>Regions</b>                 | <b>Causes</b>                | <b>Cases in<br/>1990<br/>No.×103<br/>(95% UI)</b> | <b>Cases in<br/>2019<br/>No.×103<br/>(95% UI)</b> | <b>Change in<br/>absolute<br/>number<br/>(%)</b> | <b>Rates in<br/>1990 per<br/>100000<br/>(95% UI)</b> | <b>Rates in<br/>2019 per<br/>100000<br/>(95% UI)</b> | <b>EAPC<br/>from 1990<br/>and 2019<br/>(95%CI)</b> |
|--------------------------------|------------------------------|---------------------------------------------------|---------------------------------------------------|--------------------------------------------------|------------------------------------------------------|------------------------------------------------------|----------------------------------------------------|
| <b>Tokelau</b>                 | Sickle<br>cell<br>disorders  | 0<br>(0 to 0)                                     | 0<br>(0 to 0)                                     | -0.4<br>(-0.41 to<br>-0.18)                      | 0<br>(0 to 0.01)                                     | 0<br>(0 to 0)                                        | -1.04<br>(-1.24 to<br>-0.84)                       |
| <b>Tokelau</b>                 | Sickle<br>cell trait         | 0<br>(0 to 0)                                     | 0<br>(0 to 0)                                     | -0.4<br>(-0.41 to<br>-0.23)                      | 4.88<br>(2.01 to<br>7.66)                            | 3.53<br>(1.52 to<br>5.44)                            | -1.11<br>(-1.26 to<br>-0.95)                       |
| <b>Tokelau</b>                 | G6PD<br>deficiency           | 0<br>(0 to 0)                                     | 0<br>(0 to 0)                                     | -0.28<br>(-0.3 to<br>-0.27)                      | 163.57<br>(126.26 to<br>203.65)                      | 141.26<br>(109.11 to<br>175.93)                      | -0.62<br>(-0.88 to<br>-0.36)                       |
| <b>Tokelau</b>                 | G6PD trait                   | 0<br>(0 to 0)                                     | 0<br>(0 to 0)                                     | -0.33<br>(-0.34 to<br>-0.32)                     | 493.37<br>(444.07 to<br>542.2)                       | 394.24<br>(356.04 to<br>429)                         | -0.9<br>(-1.09 to<br>-0.71)                        |
| <b>Tonga</b>                   | <b>Inherited<br/>anemias</b> | 1<br>(0 to 1)                                     | 1<br>(0 to 1)                                     | 0<br>(-0.02 to<br>0.03)                          | 545.71<br>(486.07 to<br>612.09)                      | 517.02<br>(459.71 to<br>577)                         | -0.02<br>(-0.12 to<br>0.09)                        |
| <b>Tonga</b>                   | Thalassemi<br>as             | 0<br>(0 to 0)                                     | 0<br>(0 to 0)                                     | -0.19<br>(-0.3 to<br>-0.07)                      | 2.79<br>(1.56 to<br>4.26)                            | 2.14<br>(1.16 to<br>3.22)                            | 0.4<br>(-0.58 to<br>1.39)                          |
| <b>Tonga</b>                   | Thalassemi<br>as trait       | 0<br>(0 to 0)                                     | 0<br>(0 to 0)                                     | -0.12<br>(-0.18 to<br>-0.07)                     | 86.57<br>(67.34 to<br>105.4)                         | 71.76<br>(55.04 to<br>86.75)                         | -0.04<br>(-0.44 to<br>0.35)                        |
| <b>Tonga</b>                   | Sickle<br>cell<br>disorders  | 0<br>(0 to 0)                                     | 0<br>(0 to 0)                                     | -0.01<br>(-0.1 to<br>0.95)                       | 0<br>(0 to 0)                                        | 0<br>(0 to 0)                                        | -0.13<br>(-0.25 to<br>-0.01)                       |
| <b>Tonga</b>                   | Sickle<br>cell trait         | 0<br>(0 to 0)                                     | 0<br>(0 to 0)                                     | -0.04<br>(-0.1 to<br>0.45)                       | 3.4<br>(1.5 to<br>5.26)                              | 3.09<br>(1.27 to<br>4.84)                            | -0.24<br>(-0.33 to<br>-0.15)                       |
| <b>Tonga</b>                   | G6PD<br>deficiency           | 0<br>(0 to 0)                                     | 0<br>(0 to 0)                                     | 0.09<br>(0.02 to<br>0.17)                        | 110.99<br>(85.41 to<br>140.5)                        | 114.17<br>(88.45 to<br>144.15)                       | 0.19<br>(0.06 to<br>0.32)                          |
| <b>Tonga</b>                   | G6PD trait                   | 0<br>(0 to 0)                                     | 0<br>(0 to 0)                                     | 0.01<br>(-0.01 to<br>0.03)                       | 341.96<br>(307.87 to<br>376.93)                      | 325.85<br>(294.77 to<br>354.77)                      | -0.09<br>(-0.15 to<br>-0.03)                       |
| <b>Trinidad<br/>and Tobago</b> | <b>Inherited<br/>anemias</b> | 6<br>(6 to 7)                                     | 4<br>(4 to 5)                                     | -0.32<br>(-0.34 to<br>-0.29)                     | 532.8<br>(470.78 to<br>603.1)                        | 315.06<br>(279.05 to<br>356.29)                      | -1.09<br>(-1.37 to<br>-0.81)                       |
| <b>Trinidad<br/>and Tobago</b> | Thalassemi<br>as             | 0<br>(0 to 0)                                     | 0<br>(0 to 0)                                     | 0.09<br>(-0.35 to<br>1.22)                       | 0.01<br>(0.01 to<br>0.02)                            | 0.01<br>(0 to 0.01)                                  | 0.32<br>(0.08 to<br>0.56)                          |
| <b>Trinidad<br/>and Tobago</b> | Thalassemi<br>as trait       | 0<br>(0 to 0)                                     | 0<br>(0 to 0)                                     | -0.22<br>(-0.34 to<br>0)                         | 6.99<br>(5.32 to<br>8.93)                            | 4.72<br>(3.63 to<br>5.74)                            | -0.74<br>(-0.94 to<br>-0.55)                       |

| <b>Regions</b>         | <b>Causes</b>               | <b>Cases in<br/>1990<br/>No.×103<br/>(95% UI)</b> | <b>Cases in<br/>2019<br/>No.×103<br/>(95% UI)</b> | <b>Change in<br/>absolute<br/>number<br/>(%)</b> | <b>Rates in<br/>1990 per<br/>100000<br/>(95% UI)</b> | <b>Rates in<br/>2019 per<br/>100000<br/>(95% UI)</b> | <b>EAPC<br/>from 1990<br/>and 2019<br/>(95%CI)</b> |
|------------------------|-----------------------------|---------------------------------------------------|---------------------------------------------------|--------------------------------------------------|------------------------------------------------------|------------------------------------------------------|----------------------------------------------------|
| Trinidad<br>and Tobago | Sickle<br>cell<br>disorders | 0<br>(0 to 0)                                     | 0<br>(0 to 0)                                     | -0.25<br>(-0.34 to<br>-0.17)                     | 6.54<br>(4.73 to<br>8.82)                            | 4.24<br>(2.98 to<br>5.76)                            | -0.66<br>(-1.14 to<br>-0.19)                       |
| Trinidad<br>and Tobago | Sickle<br>cell trait        | 2<br>(2 to 3)                                     | 2<br>(1 to 2)                                     | -0.3<br>(-0.35 to<br>-0.26)                      | 184.55<br>(154.26 to<br>216.5)                       | 111.28<br>(92.73 to<br>131.72)                       | -0.94<br>(-1.31 to<br>-0.57)                       |
| Trinidad<br>and Tobago | G6PD<br>deficiency          | 2<br>(1 to 2)                                     | 1<br>(1 to 2)                                     | -0.31<br>(-0.38 to<br>-0.25)                     | 149.72<br>(115.44 to<br>187.65)                      | 89.19<br>(68.94 to<br>111.02)                        | -1.09<br>(-1.35 to<br>-0.84)                       |
| Trinidad<br>and Tobago | G6PD trait                  | 2<br>(2 to 2)                                     | 1<br>(1 to 2)                                     | -0.34<br>(-0.37 to<br>-0.32)                     | 184.99<br>(164.99 to<br>203.53)                      | 105.63<br>(94.18 to<br>116.43)                       | -1.27<br>(-1.5 to<br>-1.03)                        |
| Tunisia                | Inherited<br>anemias        | 89<br>(82 to 98)                                  | 61<br>(55 to 66)                                  | -0.32<br>(-0.34 to<br>-0.3)                      | 1057.92<br>(970.61 to<br>1158.8)                     | 523.1<br>(476.61 to<br>574.07)                       | -2.14<br>(-2.26 to<br>-2.01)                       |
| Tunisia                | Thalassemi<br>as            | 0<br>(0 to 0)                                     | 0<br>(0 to 0)                                     | -0.42<br>(-0.49 to<br>-0.35)                     | 3.73<br>(2.77 to<br>4.95)                            | 1.57<br>(1.19 to<br>2.03)                            | -2.46<br>(-2.73 to<br>-2.18)                       |
| Tunisia                | Thalassemi<br>as trait      | 18<br>(15 to 20)                                  | 12<br>(10 to 13)                                  | -0.35<br>(-0.38 to<br>-0.31)                     | 209.85<br>(183 to<br>240.43)                         | 99.86<br>(87.87 to<br>112.8)                         | -2.17<br>(-2.36 to<br>-1.98)                       |
| Tunisia                | Sickle<br>cell<br>disorders | 0<br>(0 to 0)                                     | 0<br>(0 to 0)                                     | -0.45<br>(-0.5 to<br>-0.41)                      | 3.81<br>(3.11 to<br>4.65)                            | 1.52<br>(1.2 to<br>1.9)                              | -2.38<br>(-2.68 to<br>-2.09)                       |
| Tunisia                | Sickle<br>cell trait        | 17<br>(15 to 19)                                  | 10<br>(9 to 12)                                   | -0.38<br>(-0.41 to<br>-0.36)                     | 200.49<br>(181.98 to<br>220.9)                       | 90.26<br>(80.79 to<br>100.92)                        | -2.21<br>(-2.41 to<br>-2.01)                       |
| Tunisia                | G6PD<br>deficiency          | 16<br>(13 to 20)                                  | 12<br>(9 to 14)                                   | -0.28<br>(-0.34 to<br>-0.22)                     | 190.92<br>(150.89 to<br>240.78)                      | 99.82<br>(76.77 to<br>124.97)                        | -2.32<br>(-2.49 to<br>-2.15)                       |
| Tunisia                | G6PD trait                  | 38<br>(34 to 41)                                  | 27<br>(24 to 29)                                  | -0.3<br>(-0.32 to<br>-0.27)                      | 449.12<br>(407.63 to<br>488.14)                      | 230.08<br>(209.29 to<br>250.88)                      | -2.01<br>(-2.14 to<br>-1.88)                       |
| Turkey                 | Inherited<br>anemias        | 572<br>(554 to<br>589)                            | 325<br>(296 to<br>358)                            | -0.43<br>(-0.48 to<br>-0.38)                     | 956.81<br>(926.94 to<br>985.17)                      | 399.9<br>(363.36 to<br>439.6)                        | -2.9<br>(-3.23 to<br>-2.57)                        |
| Turkey                 | Thalassemi<br>as            | 1<br>(1 to 1)                                     | 1<br>(0 to 1)                                     | -0.25<br>(-0.34 to<br>-0.15)                     | 1.32<br>(1 to 1.72)                                  | 0.73<br>(0.55 to<br>0.94)                            | -2.24<br>(-2.56 to<br>-1.93)                       |
| Turkey                 | Thalassemi<br>as trait      | 77<br>(68 to 88)                                  | 51<br>(45 to 58)                                  | -0.33<br>(-0.37 to<br>-0.29)                     | 129.16<br>(113.15 to<br>147.9)                       | 63.27<br>(55.66 to<br>71.67)                         | -2.77<br>(-2.98 to<br>-2.56)                       |

| Regions          | Causes                      | Cases in<br>1990<br>No.×103<br>(95% UI) | Cases in<br>2019<br>No.×103<br>(95% UI) | Change in<br>absolute<br>number<br>(%) | Rates in<br>1990 per<br>100000<br>(95% UI) | Rates in<br>2019 per<br>100000<br>(95% UI) | EAPC<br>from 1990<br>and 2019<br>(95%CI) |
|------------------|-----------------------------|-----------------------------------------|-----------------------------------------|----------------------------------------|--------------------------------------------|--------------------------------------------|------------------------------------------|
| Turkey           | Sickle<br>cell<br>disorders | 1<br>(1 to 1)                           | 0<br>(0 to 0)                           | -0.69<br>(-0.71 to<br>-0.66)           | 1.58<br>(1.34 to<br>1.88)                  | 0.36<br>(0.31 to<br>0.42)                  | -5.9<br>(-6.32 to<br>-5.48)              |
| Turkey           | Sickle<br>cell trait        | 75<br>(69 to 82)                        | 32<br>(29 to 34)                        | -0.58<br>(-0.6 to<br>-0.56)            | 125.53<br>(115.45 to<br>137.34)            | 38.77<br>(35.94 to<br>41.85)               | -4.7<br>(-5 to<br>-4.39)                 |
| Turkey           | G6PD<br>deficiency          | 113<br>(107 to<br>119)                  | 66<br>(52 to 84)                        | -0.41<br>(-0.54 to<br>-0.26)           | 188.66<br>(178.76 to<br>198.78)            | 81.64<br>(63.66 to<br>103.33)              | -1.89<br>(-2.45 to<br>-1.33)             |
| Turkey           | G6PD trait                  | 305<br>(299 to<br>311)                  | 175<br>(161 to<br>188)                  | -0.43<br>(-0.47 to<br>-0.38)           | 510.57<br>(499.54 to<br>519.99)            | 215.12<br>(197.28 to<br>231.41)            | -2.84<br>(-3.23 to<br>-2.45)             |
| Turkmenista<br>n | Inherited<br>anemias        | 20<br>(18 to 22)                        | 17<br>(15 to 19)                        | -0.15<br>(-0.17 to<br>-0.13)           | 535.74<br>(479.69 to<br>594.26)            | 330.6<br>(295.23 to<br>368.11)             | -1.18<br>(-1.55 to<br>-0.81)             |
| Turkmenista<br>n | Thalassemi<br>as            | 0<br>(0 to 0)                           | 0<br>(0 to 0)                           | -0.32<br>(-0.4 to<br>-0.22)            | 4.28<br>(3.08 to<br>5.91)                  | 2.12<br>(1.51 to<br>2.96)                  | -1.98<br>(-2.34 to<br>-1.61)             |
| Turkmenista<br>n | Thalassemi<br>as trait      | 7<br>(6 to 8)                           | 6<br>(5 to 7)                           | -0.14<br>(-0.19 to<br>-0.08)           | 181.22<br>(151.21 to<br>220.77)            | 113.9<br>(94.5 to<br>138.32)               | -1.16<br>(-1.53 to<br>-0.8)              |
| Turkmenista<br>n | Sickle<br>cell<br>disorders | 0<br>(0 to 0)                           | 0<br>(0 to 0)                           | -0.16<br>(-0.27 to<br>-0.03)           | 0.02<br>(0.01 to<br>0.03)                  | 0.01<br>(0.01 to<br>0.02)                  | -1.17<br>(-1.55 to<br>-0.79)             |
| Turkmenista<br>n | Sickle<br>cell trait        | 1<br>(0 to 1)                           | 1<br>(0 to 1)                           | -0.16<br>(-0.22 to<br>-0.09)           | 17.01<br>(13.4 to<br>21.1)                 | 10.47<br>(8.24 to<br>13.03)                | -1.17<br>(-1.55 to<br>-0.8)              |
| Turkmenista<br>n | G6PD<br>deficiency          | 2<br>(1 to 2)                           | 2<br>(1 to 2)                           | -0.14<br>(-0.19 to<br>-0.09)           | 50.13<br>(38.64 to<br>63.73)               | 31.53<br>(24.26 to<br>39.62)               | -1.04<br>(-1.44 to<br>-0.65)             |
| Turkmenista<br>n | G6PD trait                  | 10<br>(9 to 12)                         | 9<br>(8 to 10)                          | -0.16<br>(-0.18 to<br>-0.16)           | 283.07<br>(252.27 to<br>317.08)            | 172.57<br>(153.87 to<br>192.26)            | -1.21<br>(-1.58 to<br>-0.84)             |
| Tuvalu           | Inherited<br>anemias        | 0<br>(0 to 0)                           | 0<br>(0 to 0)                           | -0.19<br>(-0.21 to<br>-0.18)           | 683.21<br>(605.24 to<br>763.66)            | 435.91<br>(385.58 to<br>484.93)            | -1.5<br>(-1.78 to<br>-1.21)              |
| Tuvalu           | Thalassemi<br>as            | 0<br>(0 to 0)                           | 0<br>(0 to 0)                           | -0.33<br>(-0.42 to<br>-0.24)           | 3.87<br>(2.1 to<br>5.85)                   | 2.05<br>(1.14 to<br>3.15)                  | -1.09<br>(-2.04 to<br>-0.13)             |
| Tuvalu           | Thalassemi<br>as trait      | 0<br>(0 to 0)                           | 0<br>(0 to 0)                           | -0.29<br>(-0.34 to<br>-0.24)           | 112.35<br>(86.79 to<br>136.29)             | 63.24<br>(48.94 to<br>77.56)               | -1.54<br>(-1.96 to<br>-1.11)             |

| Regions | Causes                      | Cases in<br>1990<br>No.×103<br>(95% UI) | Cases in<br>2019<br>No.×103<br>(95% UI) | Change in<br>absolute<br>number<br>(%) | Rates in<br>1990 per<br>100000<br>(95% UI) | Rates in<br>2019 per<br>100000<br>(95% UI) | EAPC<br>from 1990<br>and 2019<br>(95%CI) |
|---------|-----------------------------|-----------------------------------------|-----------------------------------------|----------------------------------------|--------------------------------------------|--------------------------------------------|------------------------------------------|
| Tuvalu  | Sickle<br>cell<br>disorders | 0<br>(0 to 0)                           | 0<br>(0 to 0)                           | -0.19<br>(-0.28 to<br>1.05)            | 0<br>(0 to 0)                              | 0<br>(0 to 0)                              | -1.43<br>(-1.65 to<br>-1.21)             |
| Tuvalu  | Sickle<br>cell trait        | 0<br>(0 to 0)                           | 0<br>(0 to 0)                           | -0.22<br>(-0.28 to<br>0.67)            | 4.28<br>(1.82 to<br>6.56)                  | 2.65<br>(1.13 to<br>4.53)                  | -1.6<br>(-1.8 to<br>-1.41)               |
| Tuvalu  | G6PD<br>deficiency          | 0<br>(0 to 0)                           | 0<br>(0 to 0)                           | -0.13<br>(-0.18 to<br>-0.08)           | 140.46<br>(108.48 to<br>176.68)            | 97.3<br>(75.45 to<br>120.99)               | -1.29<br>(-1.63 to<br>-0.94)             |
| Tuvalu  | G6PD trait                  | 0<br>(0 to 0)                           | 0<br>(0 to 0)                           | -0.19<br>(-0.2 to<br>-0.18)            | 422.25<br>(380.12 to<br>464.03)            | 270.67<br>(244.46 to<br>294.49)            | -1.57<br>(-1.84 to<br>-1.3)              |
| Uganda  | Inherited<br>anemias        | 437<br>(398 to<br>477)                  | 776<br>(702 to<br>857)                  | 0.78<br>(0.71 to<br>0.83)              | 2521.18<br>(2300.3 to<br>2753)             | 1887.75<br>(1706.89 to<br>2084.47)         | -1.27<br>(-1.38 to<br>-1.17)             |
| Uganda  | Thalassemi<br>as            | 0<br>(0 to 0)                           | 0<br>(0 to 0)                           | 2.81<br>(2.32 to<br>3.66)              | 0.11<br>(0.07 to<br>0.16)                  | 0.18<br>(0.1 to<br>0.27)                   | 1.22<br>(0.99 to<br>1.46)                |
| Uganda  | Thalassemi<br>as trait      | 5<br>(4 to 7)                           | 13<br>(10 to 16)                        | 1.36<br>(1.19 to<br>1.62)              | 31.6<br>(25.19 to<br>38.37)                | 31.35<br>(24.7 to<br>38.36)                | -0.26<br>(-0.41 to<br>-0.12)             |
| Uganda  | Sickle<br>cell<br>disorders | 6<br>(5 to 8)                           | 9<br>(7 to 11)                          | 0.4<br>(0.15 to<br>0.66)               | 35.32<br>(28.23 to<br>46.4)                | 20.83<br>(16.22 to<br>25.69)               | -2.29<br>(-2.48 to<br>-2.1)              |
| Uganda  | Sickle<br>cell trait        | 139<br>(125 to<br>157)                  | 216<br>(192 to<br>238)                  | 0.55<br>(0.42 to<br>0.68)              | 801.22<br>(724.19 to<br>909)               | 524.36<br>(467.09 to<br>578.72)            | -1.73<br>(-1.83 to<br>-1.63)             |
| Uganda  | G6PD<br>deficiency          | 93<br>(72 to 116)                       | 209<br>(161 to<br>260)                  | 1.26<br>(1.13 to<br>1.38)              | 535.6<br>(413.96 to<br>670.91)             | 508.79<br>(392.74 to<br>631.39)            | -0.69<br>(-0.88 to<br>-0.49)             |
| Uganda  | G6PD trait                  | 193<br>(179 to<br>206)                  | 330<br>(305 to<br>351)                  | 0.71<br>(0.7 to<br>0.71)               | 1117.32<br>(1033.75 to<br>1190.74)         | 802.25<br>(742.63 to<br>854.51)            | -1.27<br>(-1.37 to<br>-1.16)             |
| Ukraine | Inherited<br>anemias        | 82<br>(78 to 86)                        | 51<br>(48 to 53)                        | -0.38<br>(-0.39 to<br>-0.37)           | 155.35<br>(148.69 to<br>162.97)            | 114.72<br>(109.98 to<br>120.18)            | -0.02<br>(-0.45 to<br>0.42)              |
| Ukraine | Thalassemi<br>as            | 0<br>(0 to 1)                           | 0<br>(0 to 0)                           | -0.58<br>(-0.63 to<br>-0.52)           | 0.76<br>(0.53 to<br>1.11)                  | 0.38<br>(0.27 to<br>0.55)                  | -1.26<br>(-1.72 to<br>-0.81)             |
| Ukraine | Thalassemi<br>as trait      | 17<br>(14 to 21)                        | 11<br>(9 to 13)                         | -0.36<br>(-0.4 to<br>-0.31)            | 31.96<br>(26.35 to<br>39.07)               | 24.42<br>(20.29 to<br>29.32)               | 0.12<br>(-0.31 to<br>0.55)               |



| Regions              | Causes                | Cases in 1990<br>No.×103<br>(95% UI) | Cases in 2019<br>No.×103<br>(95% UI) | Change in absolute number<br>(%) | Rates in 1990 per 100000<br>(95% UI) | Rates in 2019 per 100000<br>(95% UI) | EAPC from 1990 and 2019<br>(95%CI) |
|----------------------|-----------------------|--------------------------------------|--------------------------------------|----------------------------------|--------------------------------------|--------------------------------------|------------------------------------|
| Ukraine              | Sickle cell disorders | 0<br>(0 to 0)                        | 0<br>(0 to 0)                        | -0.38<br>(-0.48 to -0.24)        | 0.01<br>(0.01 to 0.01)               | 0.01<br>(0 to 0.01)                  | -0.02<br>(-0.45 to 0.42)           |
| Ukraine              | Sickle cell trait     | 3<br>(3 to 4)                        | 2<br>(2 to 2)                        | -0.39<br>(-0.44 to -0.32)        | 6.05<br>(4.84 to 7.42)               | 4.42<br>(3.54 to 5.38)               | -0.01<br>(-0.45 to 0.42)           |
| Ukraine              | G6PD deficiency       | 13<br>(12 to 13)                     | 8<br>(8 to 9)                        | -0.35<br>(-0.36 to -0.34)        | 23.99<br>(22.85 to 25.06)            | 18.65<br>(17.76 to 19.43)            | -0.14<br>(-0.57 to 0.29)           |
| Ukraine              | G6PD trait            | 49<br>(48 to 50)                     | 29<br>(29 to 30)                     | -0.4<br>(-0.4 to -0.4)           | 92.59<br>(90.32 to 94.69)            | 66.85<br>(65.22 to 68.36)            | -0.02<br>(-0.47 to 0.42)           |
| United Arab Emirates | Inherited anemias     | 17<br>(16 to 18)                     | 20<br>(18 to 22)                     | 0.18<br>(0.08 to 0.26)           | 897.72<br>(841.26 to 944.8)          | 214.58<br>(193.63 to 236.6)          | -4.38<br>(-4.58 to -4.17)          |
| United Arab Emirates | Thalassemias          | 0<br>(0 to 0)                        | 0<br>(0 to 0)                        | 0.31<br>(0.15 to 0.47)           | 2.24<br>(1.65 to 3.01)               | 0.6<br>(0.45 to 0.82)                | -3.98<br>(-4.2 to -3.77)           |
| United Arab Emirates | Thalassemias trait    | 3<br>(2 to 3)                        | 4<br>(3 to 4)                        | 0.28<br>(0.21 to 0.35)           | 152.31<br>(132.08 to 174.82)         | 39.58<br>(34.77 to 45.67)            | -4.07<br>(-4.29 to -3.85)          |
| United Arab Emirates | Sickle cell disorders | 0<br>(0 to 0)                        | 0<br>(0 to 0)                        | 0.19<br>(0.12 to 0.28)           | 0.73<br>(0.6 to 0.88)                | 0.18<br>(0.14 to 0.21)               | -4.52<br>(-4.75 to -4.29)          |
| United Arab Emirates | Sickle cell trait     | 2<br>(1 to 2)                        | 2<br>(2 to 2)                        | 0.2<br>(0.16 to 0.24)            | 83.27<br>(75.85 to 91.33)            | 20.25<br>(18.42 to 22.21)            | -4.39<br>(-4.61 to -4.17)          |
| United Arab Emirates | G6PD deficiency       | 4<br>(4 to 5)                        | 5<br>(4 to 6)                        | 0.05<br>(-0.16 to 0.26)          | 233.69<br>(198.76 to 260.3)          | 49.72<br>(38.43 to 62.8)             | -4.88<br>(-5.02 to -4.74)          |
| United Arab Emirates | G6PD trait            | 8<br>(8 to 8)                        | 10<br>(9 to 10)                      | 0.21<br>(0.12 to 0.3)            | 425.47<br>(408.17 to 447.7)          | 104.27<br>(95.15 to 112.51)          | -4.23<br>(-4.47 to -3.99)          |
| United Kingdom       | Inherited anemias     | 146<br>(138 to 156)                  | 148<br>(142 to 155)                  | 0.01<br>(-0.01 to 0.03)          | 254.85<br>(240.95 to 271.5)          | 220.32<br>(210.67 to 231.06)         | -0.23<br>(-0.43 to -0.03)          |
| United Kingdom       | Thalassemias          | 0<br>(0 to 0)                        | 0<br>(0 to 0)                        | -0.06<br>(-0.13 to -0.01)        | 0.08<br>(0.06 to 0.11)               | 0.06<br>(0.04 to 0.09)               | -0.63<br>(-0.78 to -0.49)          |
| United Kingdom       | Thalassemias trait    | 11<br>(10 to 14)                     | 11<br>(9 to 14)                      | -0.01<br>(-0.04 to 0.01)         | 19.88<br>(16.67 to 24.38)            | 16.77<br>(13.91 to 20.71)            | -0.4<br>(-0.56 to -0.24)           |

| <b>Regions</b>              | <b>Causes</b>         | <b>Cases in<br/>1990<br/>No.×103<br/>(95% UI)</b> | <b>Cases in<br/>2019<br/>No.×103<br/>(95% UI)</b> | <b>Change in<br/>absolute<br/>number<br/>(%)</b> | <b>Rates in<br/>1990 per<br/>100000<br/>(95% UI)</b> | <b>Rates in<br/>2019 per<br/>100000<br/>(95% UI)</b> | <b>EAPC<br/>from 1990<br/>and 2019<br/>(95%CI)</b> |
|-----------------------------|-----------------------|---------------------------------------------------|---------------------------------------------------|--------------------------------------------------|------------------------------------------------------|------------------------------------------------------|----------------------------------------------------|
| United Kingdom              | Sickle cell disorders | 1<br>(0 to 1)                                     | 1<br>(0 to 1)                                     | 0.04<br>(−0.08 to 0.16)                          | 1.1<br>(0.77 to 1.55)                                | 0.98<br>(0.72 to 1.29)                               | −0.12<br>(−0.4 to 0.16)                            |
| United Kingdom              | Sickle cell trait     | 31<br>(24 to 40)                                  | 30<br>(24 to 36)                                  | −0.05<br>(−0.13 to 0.04)                         | 54.28<br>(42.14 to 69.23)                            | 43.97<br>(35.93 to 52.88)                            | −0.37<br>(−0.59 to −0.15)                          |
| United Kingdom              | G6PD deficiency       | 12<br>(11 to 12)                                  | 19<br>(18 to 20)                                  | 0.63<br>(0.61 to 0.66)                           | 20.57<br>(19.6 to 21.51)                             | 28.72<br>(27.44 to 29.88)                            | 1.45<br>(0.86 to 2.06)                             |
| United Kingdom              | G6PD trait            | 91<br>(90 to 93)                                  | 87<br>(86 to 89)                                  | −0.04<br>(−0.05 to −0.04)                        | 158.94<br>(155.75 to 161.99)                         | 129.82<br>(127.29 to 132.13)                         | −0.44<br>(−0.64 to −0.25)                          |
| United Republic of Tanzania | Inherited anemias     | 553<br>(501 to 607)                               | 877<br>(797 to 960)                               | 0.59<br>(0.55 to 0.62)                           | 2134.49<br>(1934.72 to 2344.4)                       | 1546.02<br>(1404.45 to 1691.26)                      | −1.07<br>(−1.26 to −0.89)                          |
| United Republic of Tanzania | Thalassemias          | 0<br>(0 to 0)                                     | 0<br>(0 to 0)                                     | 2.81<br>(2.3 to 3.48)                            | 0.1<br>(0.06 to 0.15)                                | 0.17<br>(0.09 to 0.25)                               | 1.63<br>(1.42 to 1.85)                             |
| United Republic of Tanzania | Thalassemias trait    | 7<br>(6 to 9)                                     | 17<br>(13 to 21)                                  | 1.35<br>(1.17 to 1.55)                           | 27.8<br>(22.03 to 33.89)                             | 29.77<br>(23.38 to 36.25)                            | 0.12<br>(0 to 0.25)                                |
| United Republic of Tanzania | Sickle cell disorders | 7<br>(6 to 9)                                     | 13<br>(10 to 16)                                  | 0.79<br>(0.62 to 0.99)                           | 27.74<br>(21.73 to 34.23)                            | 22.7<br>(18.12 to 28.1)                              | −0.71<br>(−0.92 to −0.5)                           |
| United Republic of Tanzania | Sickle cell trait     | 173<br>(155 to 191)                               | 301<br>(271 to 332)                               | 0.74<br>(0.66 to 0.82)                           | 669.22<br>(598.21 to 738.77)                         | 530.17<br>(478.51 to 585.45)                         | −0.8<br>(−0.94 to −0.66)                           |
| United Republic of Tanzania | G6PD deficiency       | 134<br>(104 to 166)                               | 177<br>(137 to 223)                               | 0.32<br>(0.24 to 0.41)                           | 515.96<br>(400.06 to 641.5)                          | 311.79<br>(241.04 to 392.18)                         | −1.68<br>(−2.03 to −1.33)                          |
| United Republic of Tanzania | G6PD trait            | 231<br>(212 to 249)                               | 370<br>(337 to 399)                               | 0.6<br>(0.59 to 0.61)                            | 893.68<br>(819.86 to 960.59)                         | 651.43<br>(594.23 to 703.22)                         | −1.02<br>(−1.17 to −0.87)                          |
| United States of America    | Inherited anemias     | 1295<br>(1231 to 1367)                            | 781<br>(761 to 800)                               | −0.4<br>(−0.43 to −0.37)                         | 510.73<br>(485.32 to 539.15)                         | 238.02<br>(232.03 to 243.78)                         | −1.85<br>(−2.29 to −1.42)                          |
| United States of America    | Thalassemias          | 1<br>(1 to 1)                                     | 1<br>(1 to 1)                                     | −0.02<br>(−0.11 to 0.09)                         | 0.43<br>(0.32 to 0.57)                               | 0.32<br>(0.26 to 0.42)                               | −0.65<br>(−0.82 to −0.48)                          |
| United States of America    | Thalassemias trait    | 89<br>(76 to 103)                                 | 87<br>(78 to 98)                                  | −0.02<br>(−0.07 to 0.04)                         | 35.03<br>(29.99 to 40.8)                             | 26.53<br>(23.67 to 29.74)                            | −0.68<br>(−0.82 to −0.54)                          |

| <b>Regions</b>               | <b>Causes</b>         | <b>Cases in<br/>1990<br/>No.×103<br/>(95% UI)</b> | <b>Cases in<br/>2019<br/>No.×103<br/>(95% UI)</b> | <b>Change in<br/>absolute<br/>number<br/>(%)</b> | <b>Rates in<br/>1990 per<br/>100000<br/>(95% UI)</b> | <b>Rates in<br/>2019 per<br/>100000<br/>(95% UI)</b> | <b>EAPC<br/>from 1990<br/>and 2019<br/>(95%CI)</b> |
|------------------------------|-----------------------|---------------------------------------------------|---------------------------------------------------|--------------------------------------------------|------------------------------------------------------|------------------------------------------------------|----------------------------------------------------|
| United States of America     | Sickle cell disorders | 44<br>(33 to 58)                                  | 2<br>(2 to 2)                                     | -0.96<br>(-0.97 to -0.95)                        | 17.25<br>(12.87 to 22.9)                             | 0.52<br>(0.46 to 0.57)                               | -8.16<br>(-10.5 to -5.75)                          |
| United States of America     | Sickle cell trait     | 524<br>(470 to 583)                               | 117<br>(110 to 125)                               | -0.78<br>(-0.8 to -0.75)                         | 206.67<br>(185.41 to 229.82)                         | 35.81<br>(33.61 to 38.24)                            | -4.17<br>(-5.15 to -3.19)                          |
| United States of America     | G6PD deficiency       | 212<br>(204 to 220)                               | 163<br>(156 to 170)                               | -0.23<br>(-0.26 to -0.21)                        | 83.66<br>(80.4 to 86.79)                             | 49.78<br>(47.48 to 51.98)                            | -1.92<br>(-2.97 to -0.85)                          |
| United States of America     | G6PD trait            | 425<br>(418 to 432)                               | 410<br>(402 to 418)                               | -0.04<br>(-0.05 to -0.02)                        | 167.7<br>(164.73 to 170.39)                          | 125.07<br>(122.55 to 127.39)                         | -0.83<br>(-1 to -0.67)                             |
| United States Virgin Islands | Inherited anemias     | 1<br>(0 to 1)                                     | 0<br>(0 to 0)                                     | -0.43<br>(-0.45 to -0.41)                        | 532.53<br>(468.36 to 605.39)                         | 311.7<br>(273.61 to 352.89)                          | -1.86<br>(-1.89 to -1.84)                          |
| United States Virgin Islands | Thalassemias          | 0<br>(0 to 0)                                     | 0<br>(0 to 0)                                     | -0.08<br>(-0.45 to 0.87)                         | 0.01<br>(0.01 to 0.02)                               | 0.01<br>(0 to 0.01)                                  | -0.36<br>(-0.6 to -0.12)                           |
| United States Virgin Islands | Thalassemias trait    | 0<br>(0 to 0)                                     | 0<br>(0 to 0)                                     | -0.34<br>(-0.45 to -0.16)                        | 7.28<br>(5.62 to 9.1)                                | 4.9<br>(3.86 to 5.97)                                | -1.43<br>(-1.5 to -1.35)                           |
| United States Virgin Islands | Sickle cell disorders | 0<br>(0 to 0)                                     | 0<br>(0 to 0)                                     | -0.35<br>(-0.43 to -0.27)                        | 3.7<br>(2.69 to 4.92)                                | 2.43<br>(1.72 to 3.39)                               | -1.53<br>(-1.71 to -1.36)                          |
| United States Virgin Islands | Sickle cell trait     | 0<br>(0 to 0)                                     | 0<br>(0 to 0)                                     | -0.4<br>(-0.44 to -0.36)                         | 153.34<br>(128.96 to 179.6)                          | 93.39<br>(75.9 to 112.08)                            | -1.75<br>(-1.83 to -1.66)                          |
| United States Virgin Islands | G6PD deficiency       | 0<br>(0 to 0)                                     | 0<br>(0 to 0)                                     | -0.44<br>(-0.49 to -0.39)                        | 167.27<br>(129.48 to 210.3)                          | 95.25<br>(73.3 to 118.27)                            | -1.95<br>(-1.97 to -1.92)                          |
| United States Virgin Islands | G6PD trait            | 0<br>(0 to 0)                                     | 0<br>(0 to 0)                                     | -0.44<br>(-0.46 to -0.4)                         | 200.93<br>(178.92 to 224.01)                         | 115.72<br>(102.98 to 129.04)                         | -1.91<br>(-1.93 to -1.9)                           |
| Uruguay                      | Inherited anemias     | 6<br>(5 to 6)                                     | 4<br>(4 to 5)                                     | -0.22<br>(-0.25 to -0.19)                        | 177.74<br>(156.31 to 201.29)                         | 127.06<br>(111.76 to 143.92)                         | -1.25<br>(-1.34 to -1.15)                          |

| <b>Regions</b> | <b>Causes</b>                | <b>Cases in<br/>1990<br/>No.×103<br/>(95% UI)</b> | <b>Cases in<br/>2019<br/>No.×103<br/>(95% UI)</b> | <b>Change in<br/>absolute<br/>number<br/>(%)</b> | <b>Rates in<br/>1990 per<br/>100000<br/>(95% UI)</b> | <b>Rates in<br/>2019 per<br/>100000<br/>(95% UI)</b> | <b>EAPC<br/>from 1990<br/>and 2019<br/>(95%CI)</b> |
|----------------|------------------------------|---------------------------------------------------|---------------------------------------------------|--------------------------------------------------|------------------------------------------------------|------------------------------------------------------|----------------------------------------------------|
| Uruguay        | Thalassemi<br>as             | 0<br>(0 to 0)                                     | 0<br>(0 to 0)                                     | -0.23<br>(-0.37 to<br>0.01)                      | 0.23<br>(0.14 to<br>0.36)                            | 0.16<br>(0.11 to<br>0.23)                            | -1.31<br>(-1.69 to<br>-0.93)                       |
| Uruguay        | Thalassemi<br>as trait       | 0<br>(0 to 0)                                     | 0<br>(0 to 0)                                     | 0.61<br>(0.36 to<br>0.94)                        | 7<br>(5.73 to<br>8.4)                                | 10.29<br>(8.74 to<br>12.11)                          | 1.61<br>(1.17 to<br>2.05)                          |
| Uruguay        | Sickle<br>cell<br>disorders  | 0<br>(0 to 0)                                     | 0<br>(0 to 0)                                     | -0.12<br>(-0.16 to<br>0.32)                      | 0<br>(0 to 0)                                        | 0<br>(0 to 0)                                        | -0.75<br>(-0.82 to<br>-0.68)                       |
| Uruguay        | Sickle<br>cell trait         | 0<br>(0 to 0)                                     | 0<br>(0 to 0)                                     | -0.12<br>(-0.16 to<br>0.23)                      | 3.24<br>(1.83 to<br>4.84)                            | 2.59<br>(1.46 to<br>3.91)                            | -0.79<br>(-0.88 to<br>-0.7)                        |
| Uruguay        | G6PD<br>deficiency           | 1<br>(1 to 1)                                     | 1<br>(1 to 1)                                     | -0.22<br>(-0.26 to<br>-0.17)                     | 28.08<br>(21.75 to<br>34.99)                         | 20.13<br>(15.59 to<br>25.54)                         | -1.3<br>(-1.39 to<br>-1.22)                        |
| Uruguay        | G6PD trait                   | 4<br>(4 to 5)                                     | 3<br>(3 to 4)                                     | -0.26<br>(-0.3 to<br>-0.23)                      | 139.2<br>(124.27 to<br>155.06)                       | 93.89<br>(83.1 to<br>105.08)                         | -1.45<br>(-1.55 to<br>-1.35)                       |
| Uzbekistan     | <b>Inherited<br/>anemias</b> | 92<br>(83 to 101)                                 | 92<br>(83 to 102)                                 | 0<br>(-0.01 to<br>0.02)                          | 436.95<br>(394.14 to<br>483.45)                      | 272.24<br>(244.98 to<br>301.41)                      | -1.21<br>(-1.49 to<br>-0.92)                       |
| Uzbekistan     | Thalassemi<br>as             | 1<br>(0 to 1)                                     | 0<br>(0 to 1)                                     | -0.28<br>(-0.36 to<br>-0.19)                     | 2.59<br>(1.85 to<br>3.75)                            | 1.16<br>(0.86 to<br>1.58)                            | -2.32<br>(-2.61 to<br>-2.03)                       |
| Uzbekistan     | Thalassemi<br>as trait       | 22<br>(19 to 26)                                  | 23<br>(20 to 26)                                  | 0.04<br>(-0.01 to<br>0.1)                        | 106.2<br>(92.88 to<br>122.15)                        | 68.92<br>(60.66 to<br>77.95)                         | -1.1<br>(-1.39 to<br>-0.81)                        |
| Uzbekistan     | Sickle<br>cell<br>disorders  | 0<br>(0 to 0)                                     | 0<br>(0 to 0)                                     | 0.02<br>(-0.13 to<br>0.22)                       | 0.02<br>(0.01 to<br>0.03)                            | 0.01<br>(0.01 to<br>0.02)                            | -1.13<br>(-1.42 to<br>-0.84)                       |
| Uzbekistan     | Sickle<br>cell trait         | 3<br>(3 to 4)                                     | 3<br>(3 to 4)                                     | 0.01<br>(-0.08 to<br>0.11)                       | 15.68<br>(12.39 to<br>19.54)                         | 9.89<br>(7.81 to<br>12.33)                           | -1.16<br>(-1.45 to<br>-0.88)                       |
| Uzbekistan     | G6PD<br>deficiency           | 10<br>(7 to 12)                                   | 10<br>(8 to 13)                                   | 0.03<br>(-0.03 to<br>0.1)                        | 46.6<br>(35.69 to<br>59.31)                          | 29.94<br>(23.04 to<br>37.98)                         | -1.04<br>(-1.34 to<br>-0.74)                       |
| Uzbekistan     | G6PD trait                   | 56<br>(50 to 62)                                  | 55<br>(49 to 61)                                  | -0.02<br>(-0.02 to<br>-0.02)                     | 265.85<br>(236.39 to<br>297.92)                      | 162.32<br>(144.33 to<br>181.91)                      | -1.27<br>(-1.56 to<br>-0.99)                       |
| Vanuatu        | <b>Inherited<br/>anemias</b> | 1<br>(1 to 1)                                     | 2<br>(2 to 2)                                     | 0.42<br>(0.36 to<br>0.49)                        | 837.72<br>(770.22 to<br>908.99)                      | 612.08<br>(543.98 to<br>681.91)                      | -1.06<br>(-1.17 to<br>-0.95)                       |

| <b>Regions</b>                              | <b>Causes</b>               | <b>Cases in<br/>1990<br/>No.×103<br/>(95% UI)</b> | <b>Cases in<br/>2019<br/>No.×103<br/>(95% UI)</b> | <b>Change in<br/>absolute<br/>number<br/>(%)</b> | <b>Rates in<br/>1990 per<br/>100000<br/>(95% UI)</b> | <b>Rates in<br/>2019 per<br/>100000<br/>(95% UI)</b> | <b>EAPC<br/>from 1990<br/>and 2019<br/>(95%CI)</b> |
|---------------------------------------------|-----------------------------|---------------------------------------------------|---------------------------------------------------|--------------------------------------------------|------------------------------------------------------|------------------------------------------------------|----------------------------------------------------|
| Vanuatu                                     | Thalassemi<br>as            | 0<br>(0 to 0)                                     | 0<br>(0 to 0)                                     | 0.19<br>(0.01 to<br>0.37)                        | 4.74<br>(2.62 to<br>7.24)                            | 2.89<br>(1.58 to<br>4.3)                             | -0.58<br>(-1.52 to<br>0.38)                        |
| Vanuatu                                     | Thalassemi<br>as trait      | 0<br>(0 to 0)                                     | 0<br>(0 to 0)                                     | 0.28<br>(0.2 to<br>0.37)                         | 135.19<br>(103.75 to<br>164.79)                      | 89.28<br>(68.81 to<br>107.4)                         | -0.99<br>(-1.37 to<br>-0.6)                        |
| Vanuatu                                     | Sickle<br>cell<br>disorders | 0<br>(0 to 0)                                     | 0<br>(0 to 0)                                     | 0.44<br>(0.32 to<br>1.85)                        | 0<br>(0 to 0.01)                                     | 0<br>(0 to 0)                                        | -1.01<br>(-1.11 to<br>-0.9)                        |
| Vanuatu                                     | Sickle<br>cell trait        | 0<br>(0 to 0)                                     | 0<br>(0 to 0)                                     | 0.4<br>(0.32 to<br>1.17)                         | 5.1<br>(2.19 to<br>7.86)                             | 3.67<br>(1.49 to<br>5.87)                            | -1.13<br>(-1.21 to<br>-1.05)                       |
| Vanuatu                                     | G6PD<br>deficiency          | 0<br>(0 to 0)                                     | 0<br>(0 to 0)                                     | 0.34<br>(0.1 to<br>0.58)                         | 193.29<br>(178.92 to<br>208.08)                      | 132.78<br>(102.5 to<br>165.37)                       | -1.36<br>(-1.4 to<br>-1.31)                        |
| Vanuatu                                     | G6PD trait                  | 1<br>(1 to 1)                                     | 1<br>(1 to 1)                                     | 0.49<br>(0.45 to<br>0.54)                        | 499.39<br>(449.04 to<br>544.7)                       | 383.46<br>(346.14 to<br>417.43)                      | -0.99<br>(-1.11 to<br>-0.87)                       |
| Venezuela<br>(Bolivarian<br>Republic<br>of) | Inherited<br>anemias        | 117<br>(105 to<br>130)                            | 82<br>(73 to 91)                                  | -0.3<br>(-0.32 to<br>-0.28)                      | 623.71<br>(557.42 to<br>691.53)                      | 292.36<br>(260.36 to<br>325.68)                      | -2.14<br>(-2.36 to<br>-1.92)                       |
| Venezuela<br>(Bolivarian<br>Republic<br>of) | Thalassemi<br>as            | 0<br>(0 to 0)                                     | 0<br>(0 to 0)                                     | 0.42<br>(-0.15 to<br>1.84)                       | 0.01<br>(0.01 to<br>0.02)                            | 0.01<br>(0.01 to<br>0.02)                            | 0.25<br>(-0.07 to<br>0.57)                         |
| Venezuela<br>(Bolivarian<br>Republic<br>of) | Thalassemi<br>as trait      | 2<br>(1 to 2)                                     | 2<br>(2 to 2)                                     | 0.02<br>(-0.15 to<br>0.31)                       | 10.22<br>(7.96 to<br>12.78)                          | 7.02<br>(5.46 to<br>8.57)                            | -0.84<br>(-1.05 to<br>-0.63)                       |
| Venezuela<br>(Bolivarian<br>Republic<br>of) | Sickle<br>cell<br>disorders | 0<br>(0 to 0)                                     | 0<br>(0 to 0)                                     | -0.59<br>(-0.65 to<br>-0.52)                     | 1.29<br>(1.03 to<br>1.58)                            | 0.36<br>(0.27 to<br>0.45)                            | -4.24<br>(-4.54 to<br>-3.94)                       |
| Venezuela<br>(Bolivarian<br>Republic<br>of) | Sickle<br>cell trait        | 17<br>(15 to 20)                                  | 7<br>(6 to 8)                                     | -0.58<br>(-0.61 to<br>-0.55)                     | 92.5<br>(81.89 to<br>105.05)                         | 26.24<br>(22.84 to<br>30.24)                         | -4.25<br>(-4.56 to<br>-3.95)                       |
| Venezuela<br>(Bolivarian<br>Republic<br>of) | G6PD<br>deficiency          | 20<br>(16 to 25)                                  | 13<br>(10 to 16)                                  | -0.36<br>(-0.39 to<br>-0.32)                     | 108.26<br>(83.15 to<br>135.29)                       | 46.66<br>(36.05 to<br>58.04)                         | -2.37<br>(-2.76 to<br>-1.97)                       |

| Regions                            | Causes                | Cases in 1990<br>No.×103<br>(95% UI) | Cases in 2019<br>No.×103<br>(95% UI) | Change in absolute number<br>(%) | Rates in 1990 per 100000<br>(95% UI) | Rates in 2019 per 100000<br>(95% UI) | EAPC from 1990 and 2019<br>(95%CI) |
|------------------------------------|-----------------------|--------------------------------------|--------------------------------------|----------------------------------|--------------------------------------|--------------------------------------|------------------------------------|
| Venezuela (Bolivarian Republic of) | G6PD trait            | 77<br>(70 to 85)                     | 60<br>(54 to 65)                     | -0.23<br>(-0.25 to -0.21)        | 411.43<br>(370.73 to 451.25)         | 212.07<br>(191.01 to 232.26)         | -1.77<br>(-2.03 to -1.52)          |
| Viet Nam                           | Inherited anemias     | 449<br>(409 to 490)                  | 306<br>(280 to 334)                  | -0.32<br>(-0.34 to -0.3)         | 660.5<br>(602.22 to 721.6)           | 317.58<br>(290.51 to 346.36)         | -2.11<br>(-2.32 to -1.9)           |
| Viet Nam                           | Thalassemi as         | 5<br>(4 to 6)                        | 4<br>(3 to 4)                        | -0.3<br>(-0.37 to -0.22)         | 7.5<br>(6.24 to 9.22)                | 3.7<br>(3.15 to 4.4)                 | -1.99<br>(-2.16 to -1.83)          |
| Viet Nam                           | Thalassemi as trait   | 122<br>(111 to 134)                  | 101<br>(93 to 111)                   | -0.17<br>(-0.2 to -0.14)         | 179.54<br>(163.98 to 197.16)         | 105.25<br>(96.12 to 115.22)          | -1.41<br>(-1.57 to -1.25)          |
| Viet Nam                           | Sickle cell disorders | 0<br>(0 to 0)                        | 0<br>(0 to 0)                        | -0.25<br>(-0.44 to -0.05)        | 0.02<br>(0.01 to 0.03)               | 0.01<br>(0.01 to 0.01)               | -1.69<br>(-1.89 to -1.5)           |
| Viet Nam                           | Sickle cell trait     | 9<br>(7 to 11)                       | 7<br>(6 to 8)                        | -0.25<br>(-0.35 to -0.16)        | 13.38<br>(10.9 to 16.06)             | 7.04<br>(5.73 to 8.51)               | -1.73<br>(-1.91 to -1.56)          |
| Viet Nam                           | G6PD deficiency       | 56<br>(43 to 70)                     | 34<br>(26 to 42)                     | -0.4<br>(-0.43 to -0.36)         | 82.84<br>(63.76 to 103.03)           | 35<br>(27.14 to 43.69)               | -2.62<br>(-2.89 to -2.34)          |
| Viet Nam                           | G6PD trait            | 256<br>(231 to 280)                  | 161<br>(144 to 176)                  | -0.37<br>(-0.4 to -0.35)         | 377.23<br>(340.71 to 411.8)          | 166.58<br>(149.83 to 182.99)         | -2.4<br>(-2.64 to -2.15)           |
| Yemen                              | Inherited anemias     | 221<br>(200 to 243)                  | 313<br>(283 to 345)                  | 0.42<br>(0.39 to 0.44)           | 1609.29<br>(1454.34 to 1769.64)      | 994.97<br>(897.64 to 1094.65)        | -1.53<br>(-1.77 to -1.29)          |
| Yemen                              | Thalassemi as         | 1<br>(0 to 1)                        | 1<br>(1 to 1)                        | 0.49<br>(0.33 to 0.7)            | 4.84<br>(3.2 to 7.19)                | 3.14<br>(2.17 to 4.57)               | -1.43<br>(-1.65 to -1.2)           |
| Yemen                              | Thalassemi as trait   | 44<br>(36 to 53)                     | 65<br>(55 to 77)                     | 0.47<br>(0.39 to 0.56)           | 320.4<br>(264.93 to 386.3)           | 205.31<br>(173.14 to 244.51)         | -1.44<br>(-1.68 to -1.21)          |
| Yemen                              | Sickle cell disorders | 0<br>(0 to 0)                        | 0<br>(0 to 0)                        | 0.4<br>(0.32 to 0.49)            | 1.59<br>(1.34 to 1.87)               | 0.97<br>(0.82 to 1.17)               | -1.58<br>(-1.83 to -1.33)          |
| Yemen                              | Sickle cell trait     | 23<br>(22 to 26)                     | 33<br>(30 to 36)                     | 0.4<br>(0.36 to 0.44)            | 170.78<br>(156.82 to 185.96)         | 103.84<br>(95.57 to 114.3)           | -1.58<br>(-1.83 to -1.33)          |
| Yemen                              | G6PD deficiency       | 42<br>(33 to 53)                     | 59<br>(46 to 74)                     | 0.39<br>(0.32 to 0.46)           | 309.42<br>(239.56 to 387.94)         | 187.22<br>(144.98 to 235.59)         | -1.61<br>(-1.86 to -1.35)          |

| <b>Regions</b> | <b>Causes</b>         | <b>Cases in<br/>1990<br/>No.×103<br/>(95% UI)</b> | <b>Cases in<br/>2019<br/>No.×103<br/>(95% UI)</b> | <b>Change in<br/>absolute<br/>number<br/>(%)</b> | <b>Rates in<br/>1990 per<br/>100000<br/>(95% UI)</b> | <b>Rates in<br/>2019 per<br/>100000<br/>(95% UI)</b> | <b>EAPC<br/>from 1990<br/>and 2019<br/>(95%CI)</b> |
|----------------|-----------------------|---------------------------------------------------|---------------------------------------------------|--------------------------------------------------|------------------------------------------------------|------------------------------------------------------|----------------------------------------------------|
| Yemen          | G6PD trait            | 110<br>(100 to 120)                               | 156<br>(142 to 169)                               | 0.41<br>(0.4 to 0.44)                            | 802.25<br>(729.52 to 874)                            | 494.49<br>(449.75 to 536.35)                         | -1.53<br>(-1.76 to -1.3)                           |
| Zambia         | Inherited anemias     | 210<br>(188 to 232)                               | 316<br>(284 to 349)                               | 0.51<br>(0.45 to 0.56)                           | 2637.68<br>(2370.15 to 2917.04)                      | 1732.24<br>(1559.13 to 1914.22)                      | -1.47<br>(-1.64 to -1.3)                           |
| Zambia         | Thalassemias          | 0<br>(0 to 0)                                     | 0<br>(0 to 0)                                     | 2.47<br>(2.04 to 3.08)                           | 0.1<br>(0.06 to 0.16)                                | 0.15<br>(0.09 to 0.23)                               | 1.09<br>(0.86 to 1.32)                             |
| Zambia         | Thalassemias trait    | 2<br>(2 to 3)                                     | 5<br>(4 to 6)                                     | 1.17<br>(1.02 to 1.36)                           | 29.01<br>(22.77 to 35.5)                             | 27.38<br>(21.75 to 33.29)                            | -0.38<br>(-0.53 to -0.23)                          |
| Zambia         | Sickle cell disorders | 4<br>(3 to 5)                                     | 5<br>(4 to 6)                                     | 0.28<br>(0.08 to 0.5)                            | 50.15<br>(38.96 to 66.63)                            | 28.05<br>(22.65 to 35.11)                            | -1.83<br>(-2.28 to -1.38)                          |
| Zambia         | Sickle cell trait     | 70<br>(62 to 80)                                  | 100<br>(91 to 111)                                | 0.43<br>(0.32 to 0.54)                           | 881.5<br>(785.04 to 1005.69)                         | 549.76<br>(498.96 to 610.93)                         | -1.58<br>(-1.84 to -1.32)                          |
| Zambia         | G6PD deficiency       | 57<br>(44 to 71)                                  | 86<br>(67 to 106)                                 | 0.51<br>(0.39 to 0.62)                           | 719.65<br>(558.35 to 893.7)                          | 472.22<br>(365.39 to 583.62)                         | -1.51<br>(-1.65 to -1.36)                          |
| Zambia         | G6PD trait            | 76<br>(70 to 81)                                  | 119<br>(110 to 128)                               | 0.57<br>(0.52 to 0.62)                           | 957.27<br>(880.26 to 1025.9)                         | 654.67<br>(603.12 to 701.92)                         | -1.36<br>(-1.48 to -1.25)                          |
| Zimbabwe       | Inherited anemias     | 125<br>(111 to 140)                               | 138<br>(122 to 154)                               | 0.1<br>(0.07 to 0.12)                            | 1210.48<br>(1071.29 to 1356.02)                      | 917.68<br>(813.25 to 1023.71)                        | -0.67<br>(-0.81 to -0.53)                          |
| Zimbabwe       | Thalassemias          | 0<br>(0 to 0)                                     | 0<br>(0 to 0)                                     | 1.43<br>(1.04 to 1.97)                           | 0.08<br>(0.05 to 0.12)                               | 0.14<br>(0.08 to 0.21)                               | 1.81<br>(1.64 to 1.98)                             |
| Zimbabwe       | Thalassemias trait    | 3<br>(3 to 4)                                     | 4<br>(4 to 5)                                     | 0.48<br>(0.35 to 0.64)                           | 29.12<br>(24.46 to 34.81)                            | 29.72<br>(24.26 to 35.38)                            | 0.29<br>(0.17 to 0.41)                             |
| Zimbabwe       | Sickle cell disorders | 0<br>(0 to 0)                                     | 0<br>(0 to 0)                                     | -0.08<br>(-0.19 to 0.02)                         | 1.69<br>(1.3 to 2.24)                                | 1.07<br>(0.8 to 1.42)                                | -1.9<br>(-2.1 to -1.7)                             |
| Zimbabwe       | Sickle cell trait     | 16<br>(14 to 18)                                  | 16<br>(14 to 19)                                  | 0.03<br>(-0.04 to 0.08)                          | 153.73<br>(134.56 to 177.18)                         | 108.56<br>(94.28 to 125.73)                          | -1.21<br>(-1.31 to -1.12)                          |
| Zimbabwe       | G6PD deficiency       | 36<br>(28 to 46)                                  | 39<br>(30 to 49)                                  | 0.06<br>(0.03 to 0.1)                            | 352.6<br>(271.28 to 441.64)                          | 258.58<br>(198.98 to 324.49)                         | -0.75<br>(-0.94 to -0.56)                          |

| <b>Regions</b> | <b>Causes</b> | <b>Cases in<br/>1990<br/>No.×103<br/>(95% UI)</b> | <b>Cases in<br/>2019<br/>No.×103<br/>(95% UI)</b> | <b>Change in<br/>absolute<br/>number<br/>(%)</b> | <b>Rates in<br/>1990 per<br/>100000<br/>(95% UI)</b> | <b>Rates in<br/>2019 per<br/>100000<br/>(95% UI)</b> | <b>EAPC<br/>from 1990<br/>and 2019<br/>(95%CI)</b> |
|----------------|---------------|---------------------------------------------------|---------------------------------------------------|--------------------------------------------------|------------------------------------------------------|------------------------------------------------------|----------------------------------------------------|
| Zimbabwe       | G6PD trait    | 70<br>(64 to 75)                                  | 78<br>(71 to 84)                                  | 0.12<br>(0.09 to<br>0.15)                        | 673.26<br>(615.69 to<br>728.09)                      | 519.61<br>(473.24 to<br>561.3)                       | -0.56<br>(-0.7 to<br>-0.42)                        |

**Abbreviations:** EAPC, estimated annual percentage change; UI, uncertainty interval. CI, confidence interval.
